# Supplementary material for: Comparative genomics of the nonlegume Parasponia reveals insights into evolution of nitrogen-fixing rhizobium symbioses
Source: PubMed Central journal article supplement — Proc Natl Acad Sci U S A. 2018 May 1;115(20):E4700–9. doi: 10.1073/pnas.1721395115 (PMC5960304; doi:10.1073/pnas.1721395115), 2018-05-01

## Comparative genomics of the non-legume *Parasponia* reveals insights into evolution of nitrogen-fixing rhizobium symbioses

Robin van Velzen, Rens Holmer, Fengjiao Bu, Luuk Rutten, Arjan van Zeijl, Wei Liu, Luca Santuari, Qingqin Cao, Trupti Sharma, Defeng Shen, Yuda Roswanjaya, Titis A.K. Wardhani, Maryam Seifi Kalhor, Joelle Jansen, Johan van den Hoogen, Berivan Güngör, Marijke Hartog, Jan Hontelez, Jan Verver, Wei-Cai Yang, Elio Schijlen, Rimi Repin, Menno Schilthuizen, M. Eric Schranz, Renze Heidstra, Kana Miyata, Elena Fedorova, Wouter Kohlen, Ton Bisseling, Sandra Smit, & Rene Geurts

Phylogenetic analysis of *Parasponia andersonii* and *Trema orientalis* RG33 putative orthologs of legume genes that function in symbioses.

Phylogenetic trees (based on Maximum Likelihood) of orthogroups containing published genes that function in symbiosis (see also Dataset S1). OrthoGroup number corresponds to Dataset S2. Node labels indicate bootstrap support values; scale bars represent evolutionary distance in substitutions per site. Legume genes that function in symbioses are marked in bold. Proteins from *Arabidopsis thaliana* (AT) are marked in green, *Eucalyptus grandis* (Eucgr) in olive, *Populus trichocarpa* (Potri) in light blue, *Medicago truncatula* (Medtr) in purple, *Glycine max* (Glyma) in mint, *Fragaria vesca* (Fvesca) in pink, *P. andersonii* (Pan) in dark blue, and *T. orientalis* RG33 (Tor) in dark red. Legume or actinorrhizal symbiosis genes from species not included in the orthogroup inferences are in black. Agl = *Alnus glutinosa*, Cgl = *Casuarina glauca*, Dgl = *Datisca glomerata*, Lja = *Lotus japonicus*, Msa = *Medicago sativa*, Mtr = *Medicago truncatula*, Phy = *Petunia hybrida*, Psa = *Pisum sativum*, Pvu = *Phaseolus vulgaris*.

# OG0007755: Receptor complexes. LysM receptor kinase (type 1)

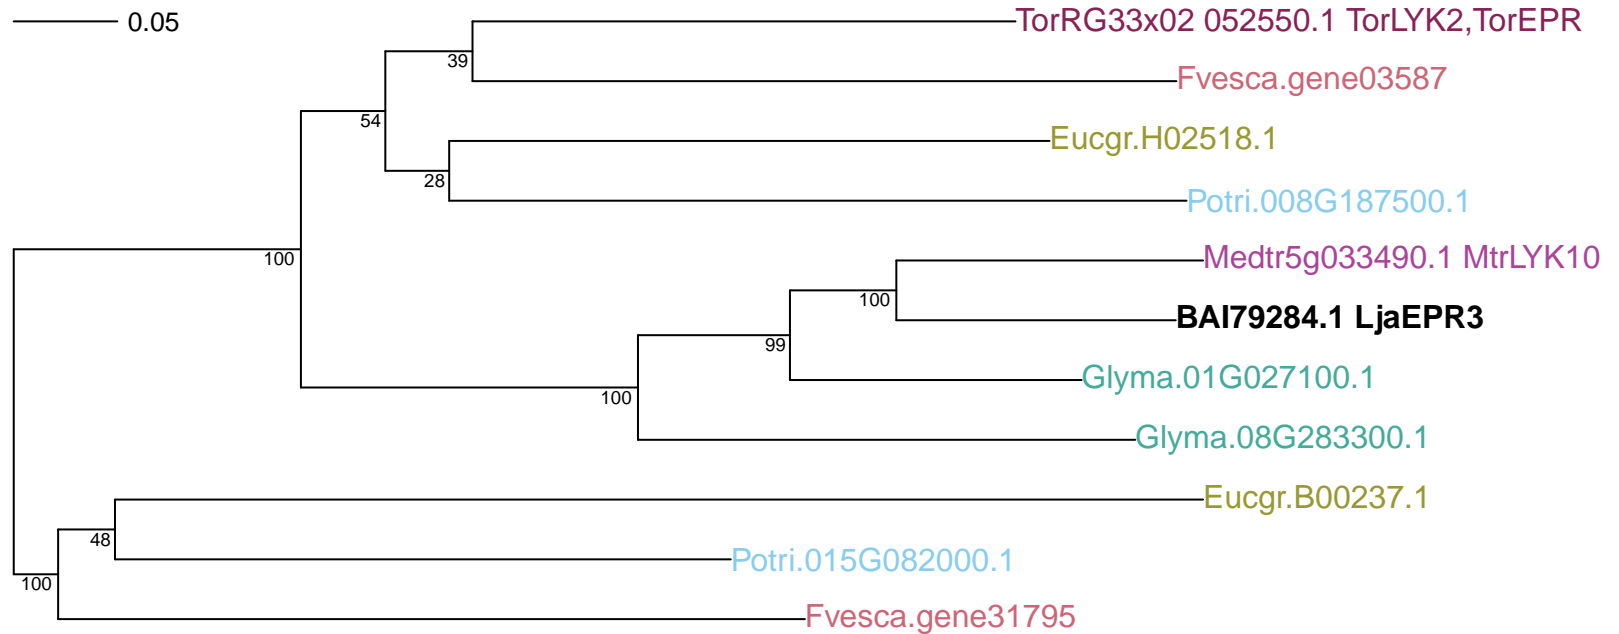

# OG0002182: Receptor complexes. LysM receptor kinase (type 1)

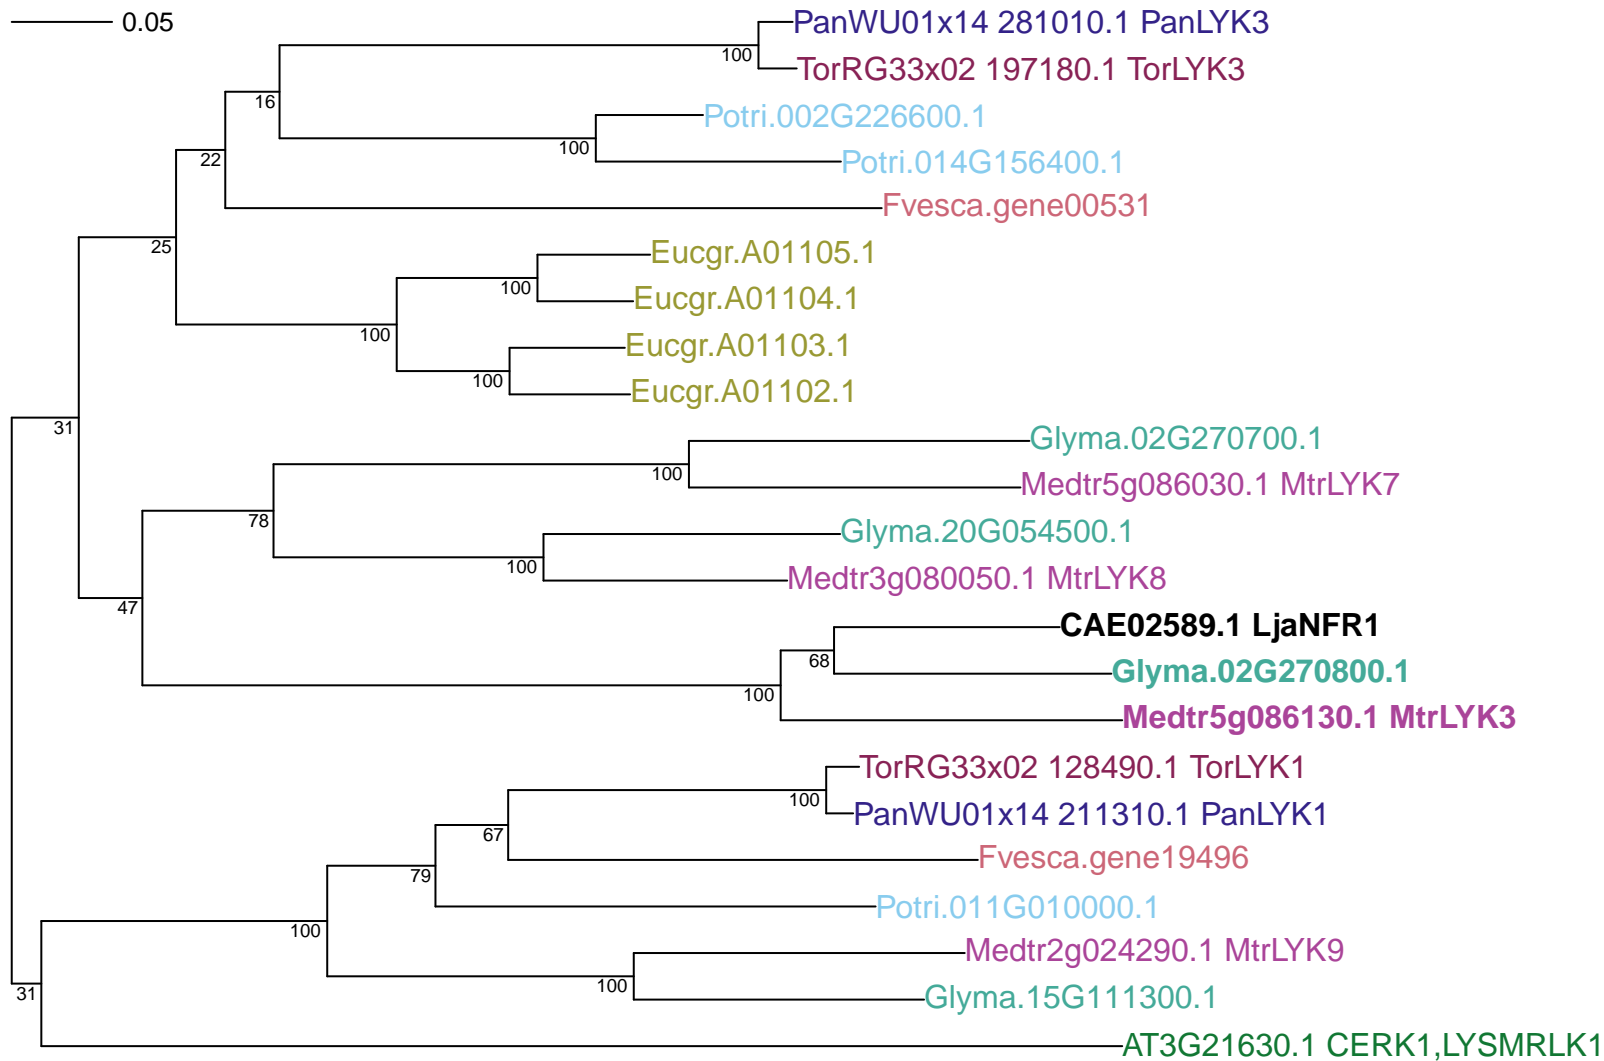

# OG0006376: Receptor complexes. LysM receptor kinase (type 2)

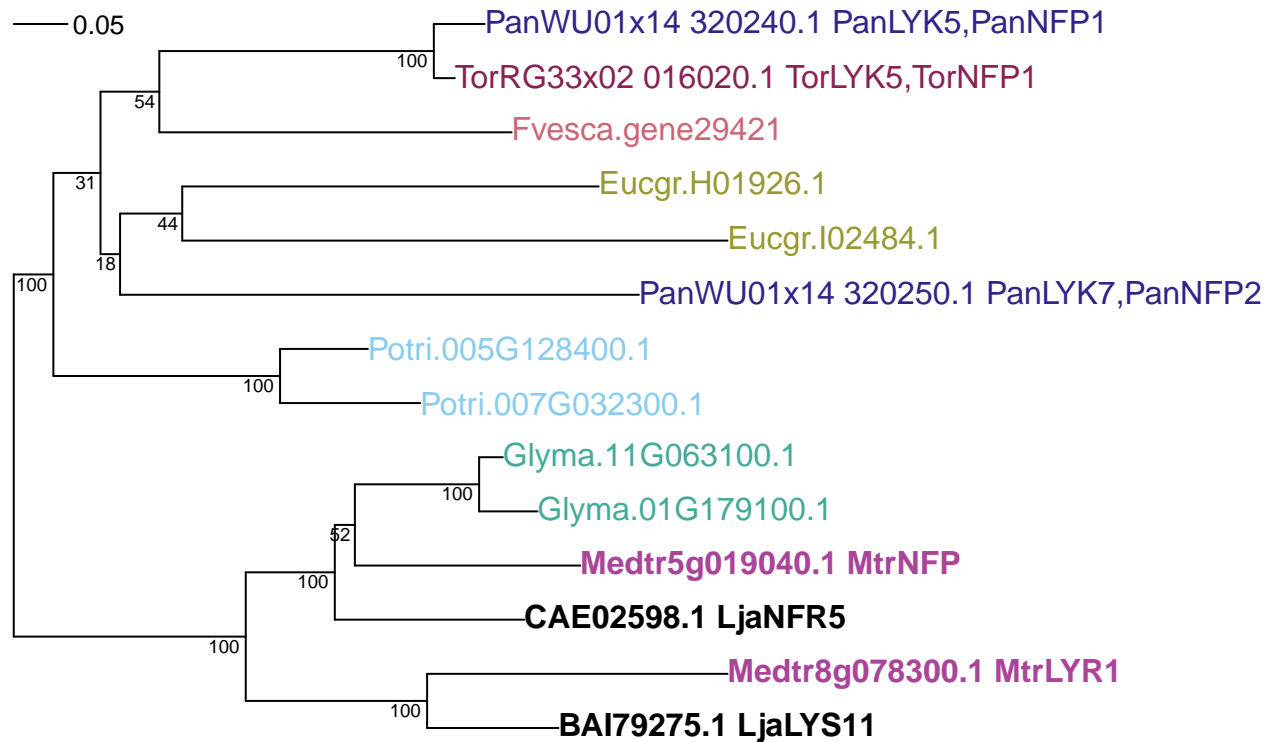

# OG0003224-0018959: Receptor complexes. LysM receptor kinase (type 2)

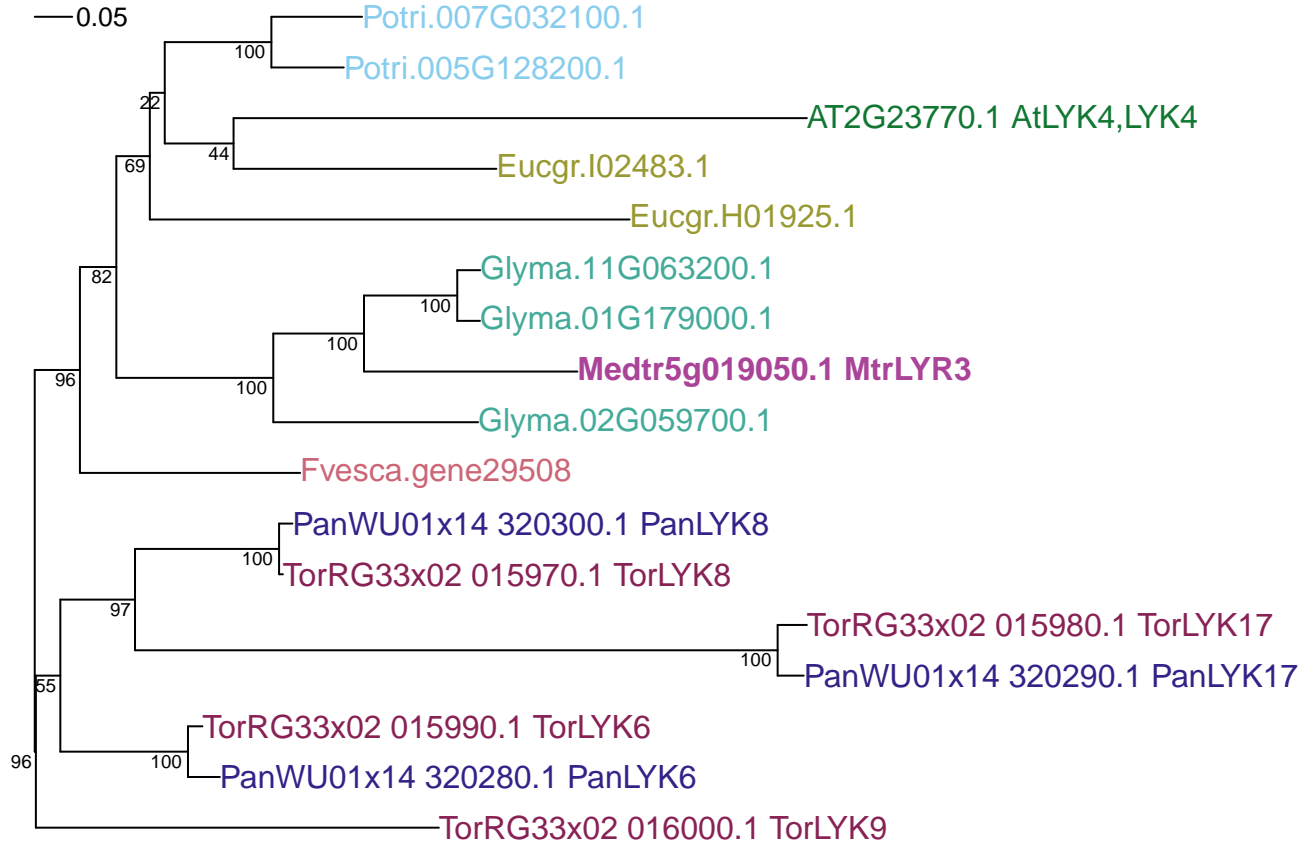

# OG0001771: Receptor complexes. Flotilin

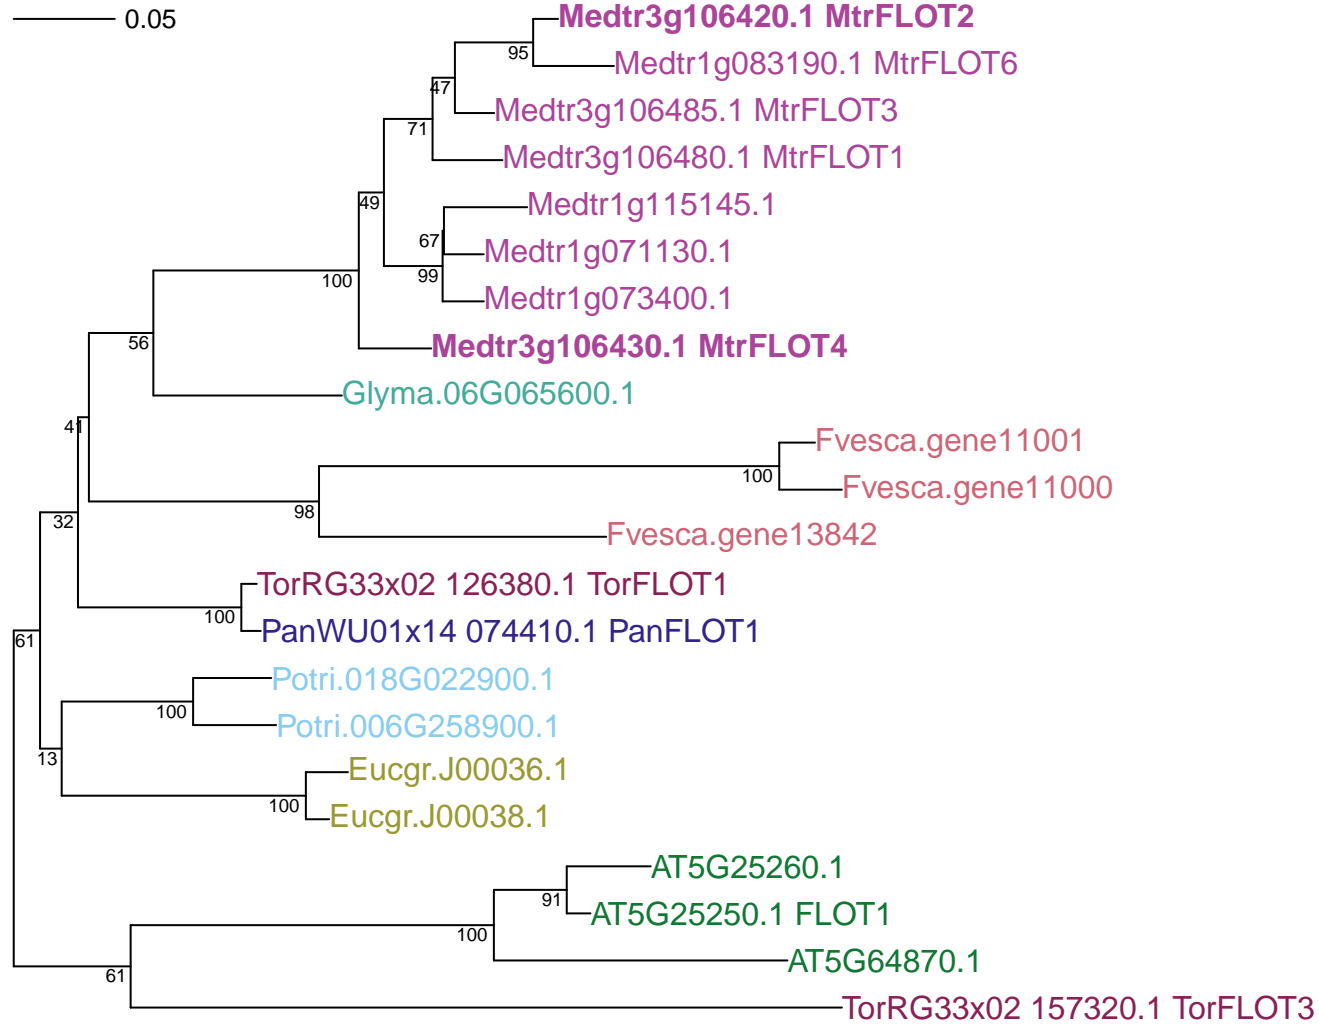

# OG0013351: Receptor complexes. Plant U-box protein PUB1

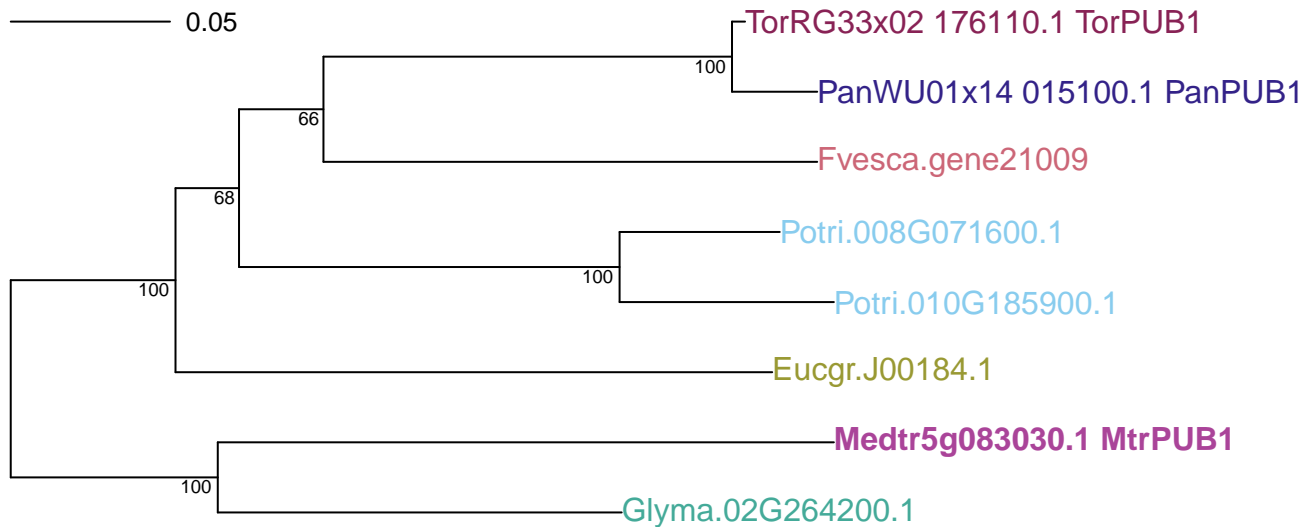

## OG0012091: Receptor complexes. SYMRK symbiotic receptor kinase

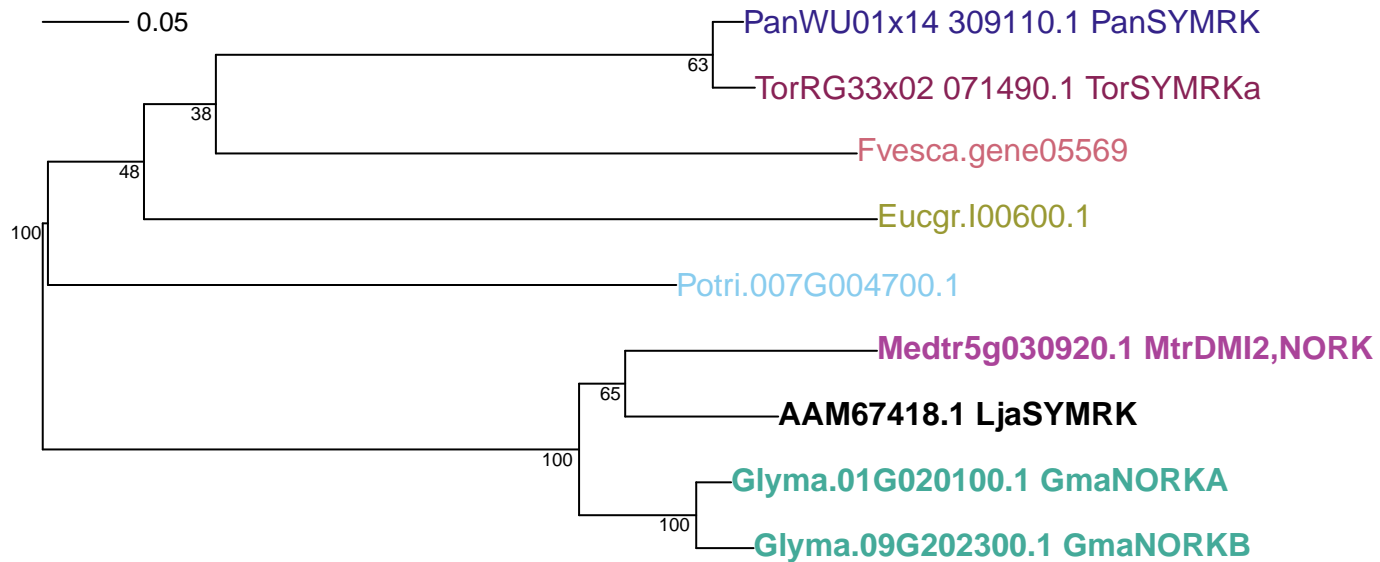



# OG0000580: Receptor complexes. SYMRK interacting protein HMGR

— 0.05

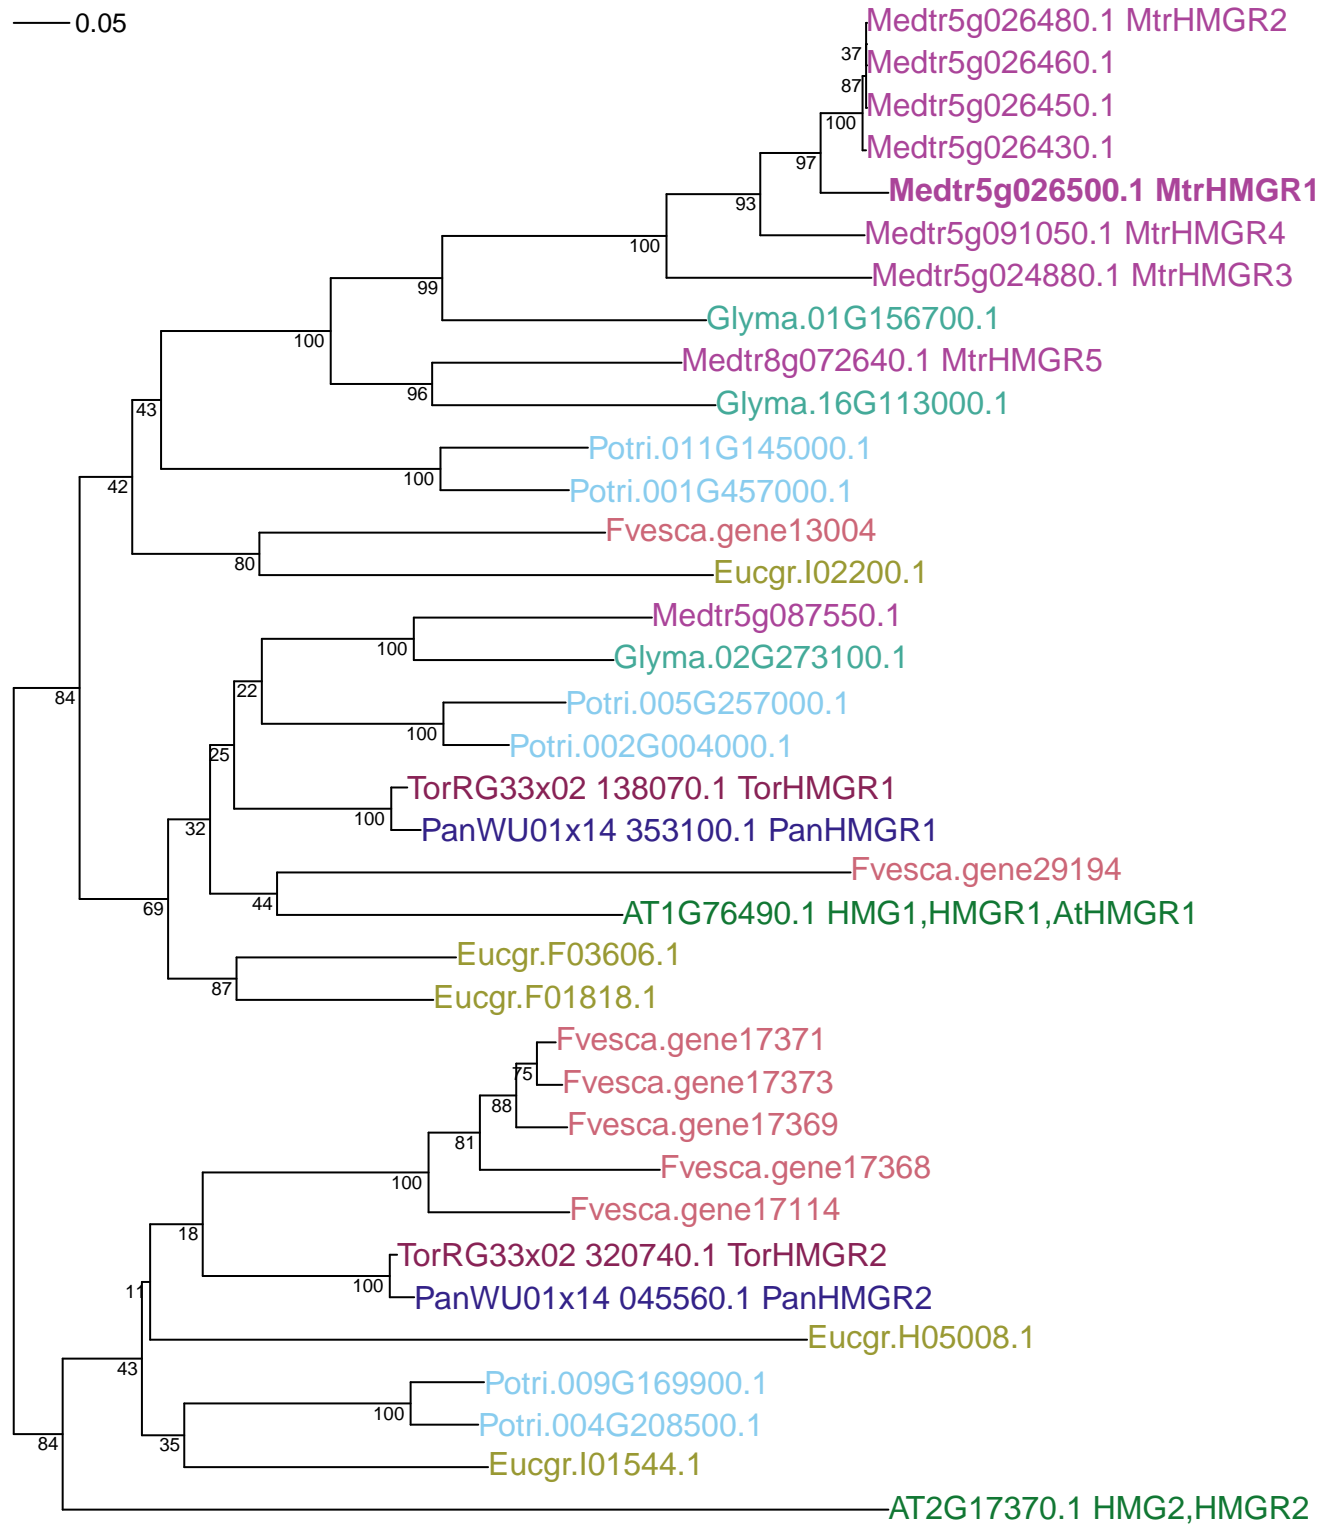

# OG0001217: Receptor complexes. SYMRK interacting protein SIP1

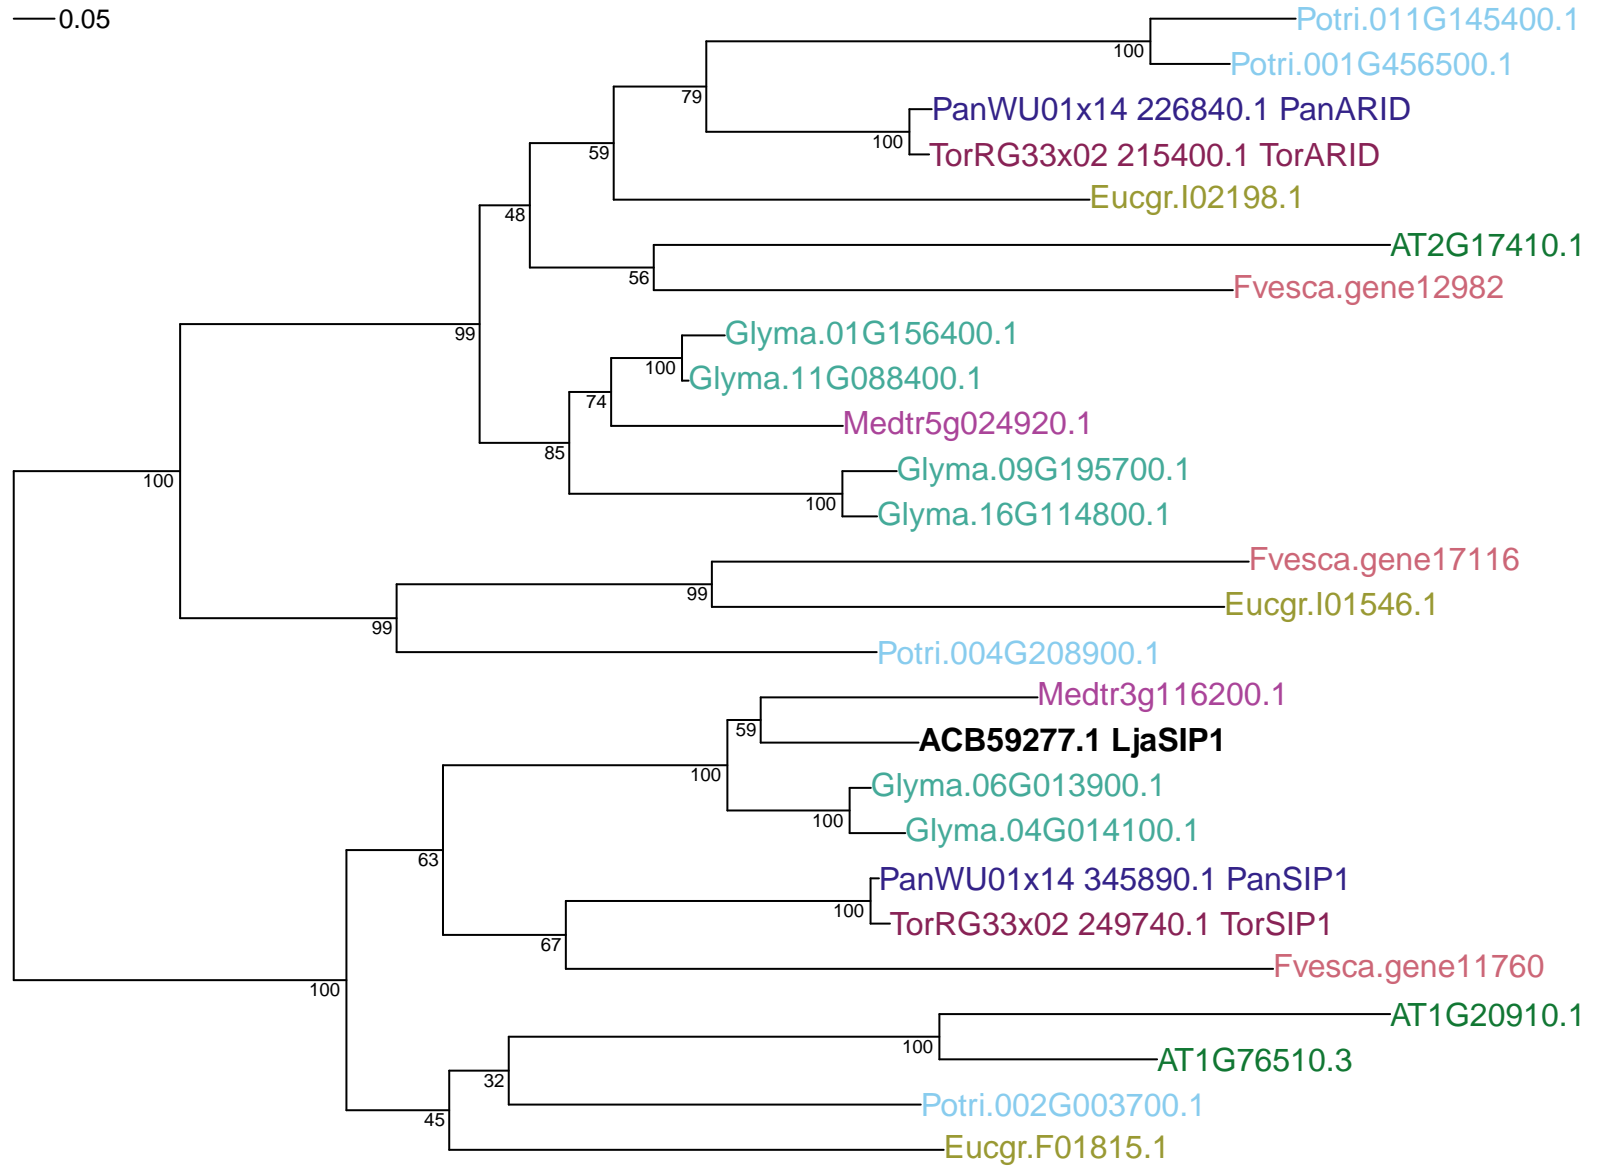

# OG0006630: Receptor complexes. SYMRK interacting protein SIP2

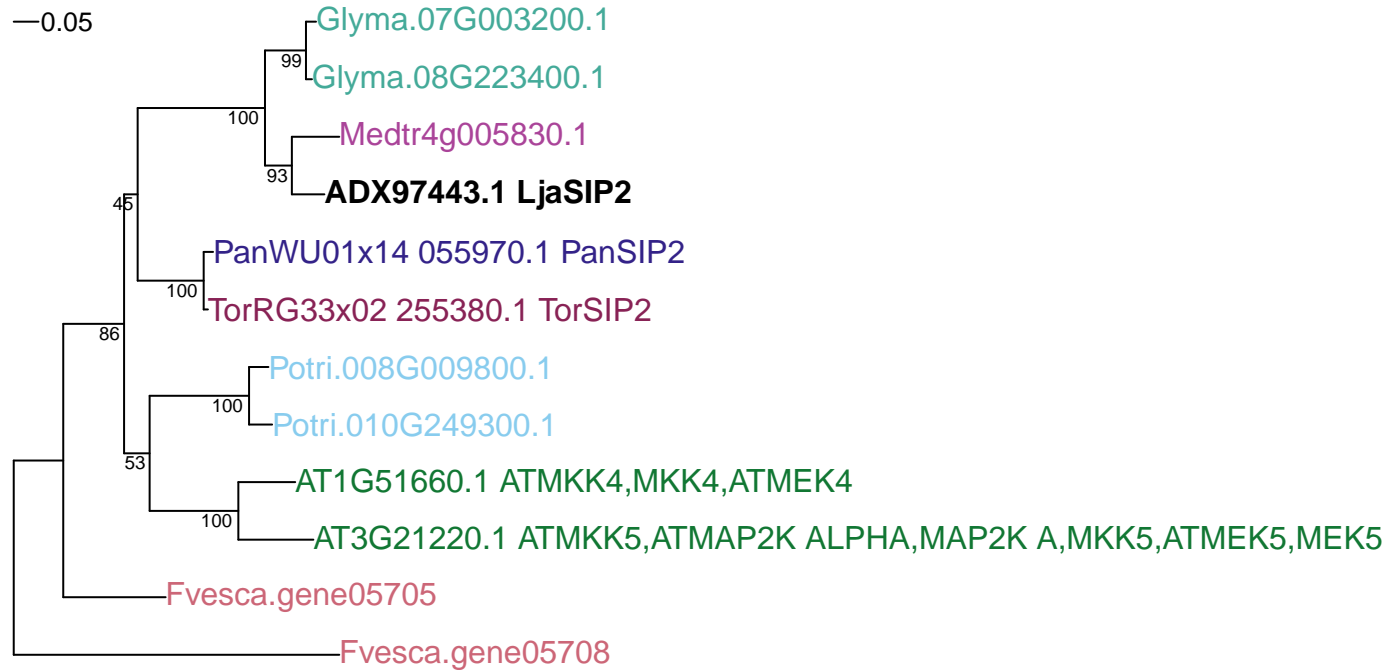

# OG0002406: Receptor complexes. SYMRK interacting protein SINA4

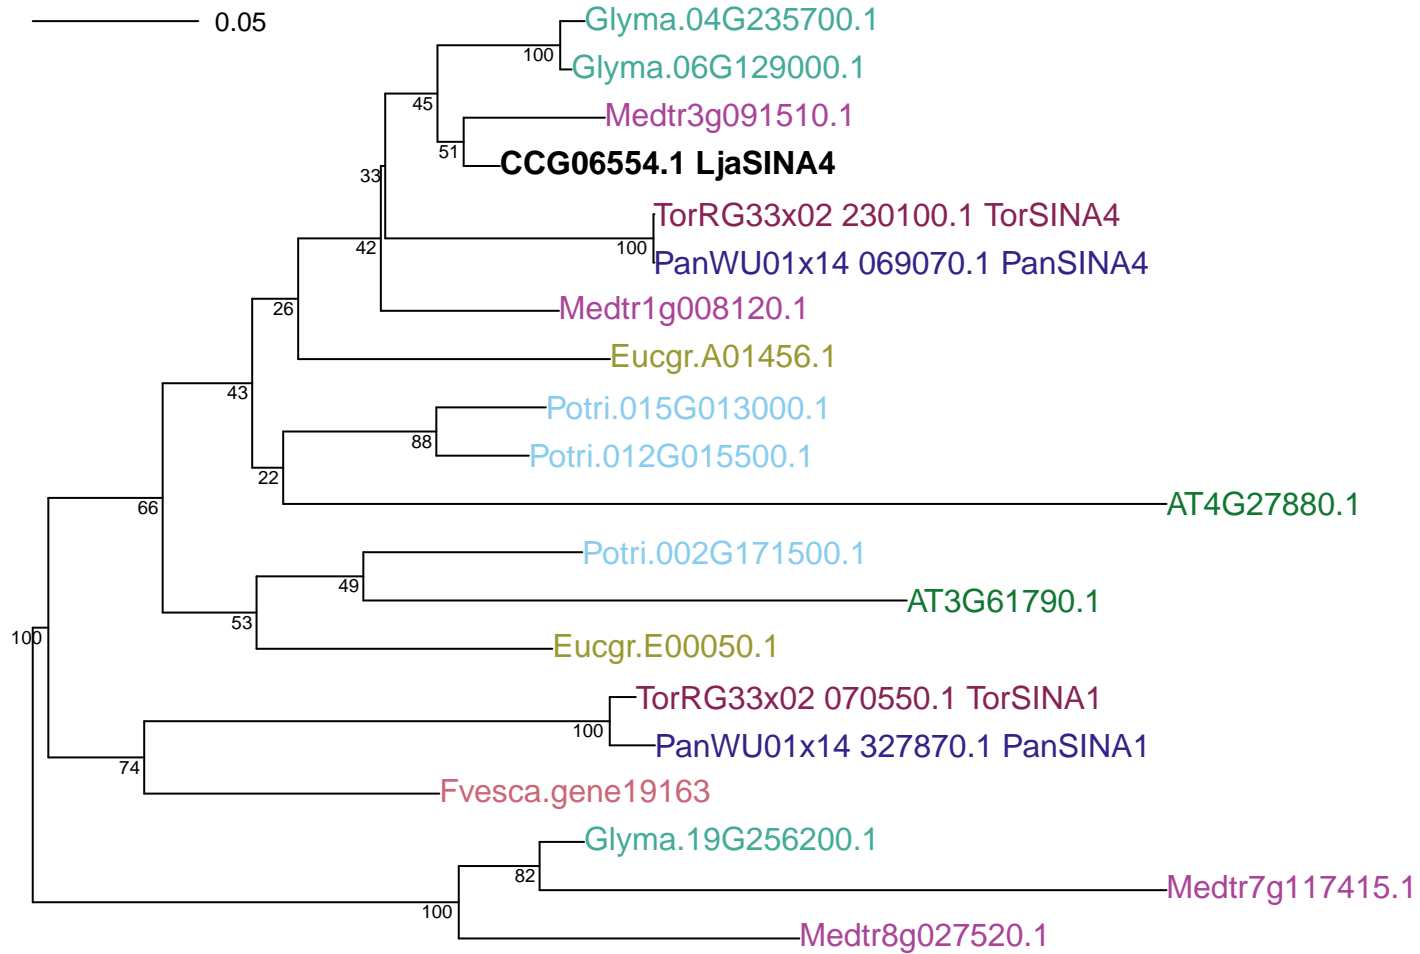

# OG0002105: Receptor complexes. SYMRK interacting protein SIE3

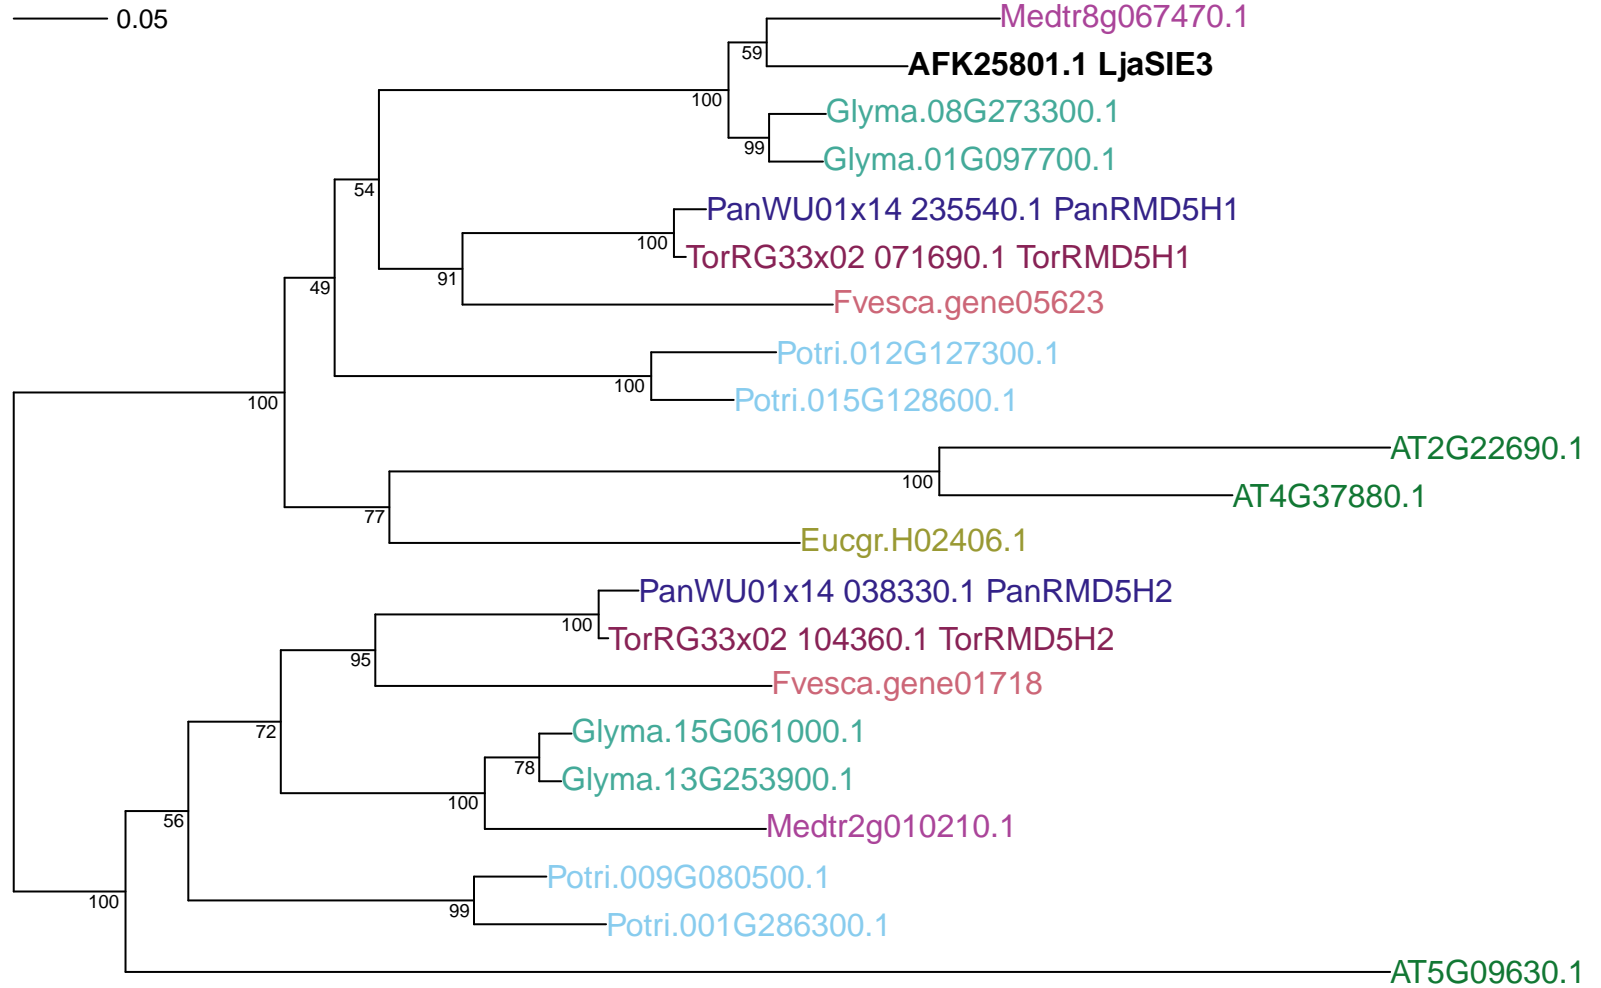

# OG0000601: Receptor complexes. Calcium-dependent protein kinase

— 0.05

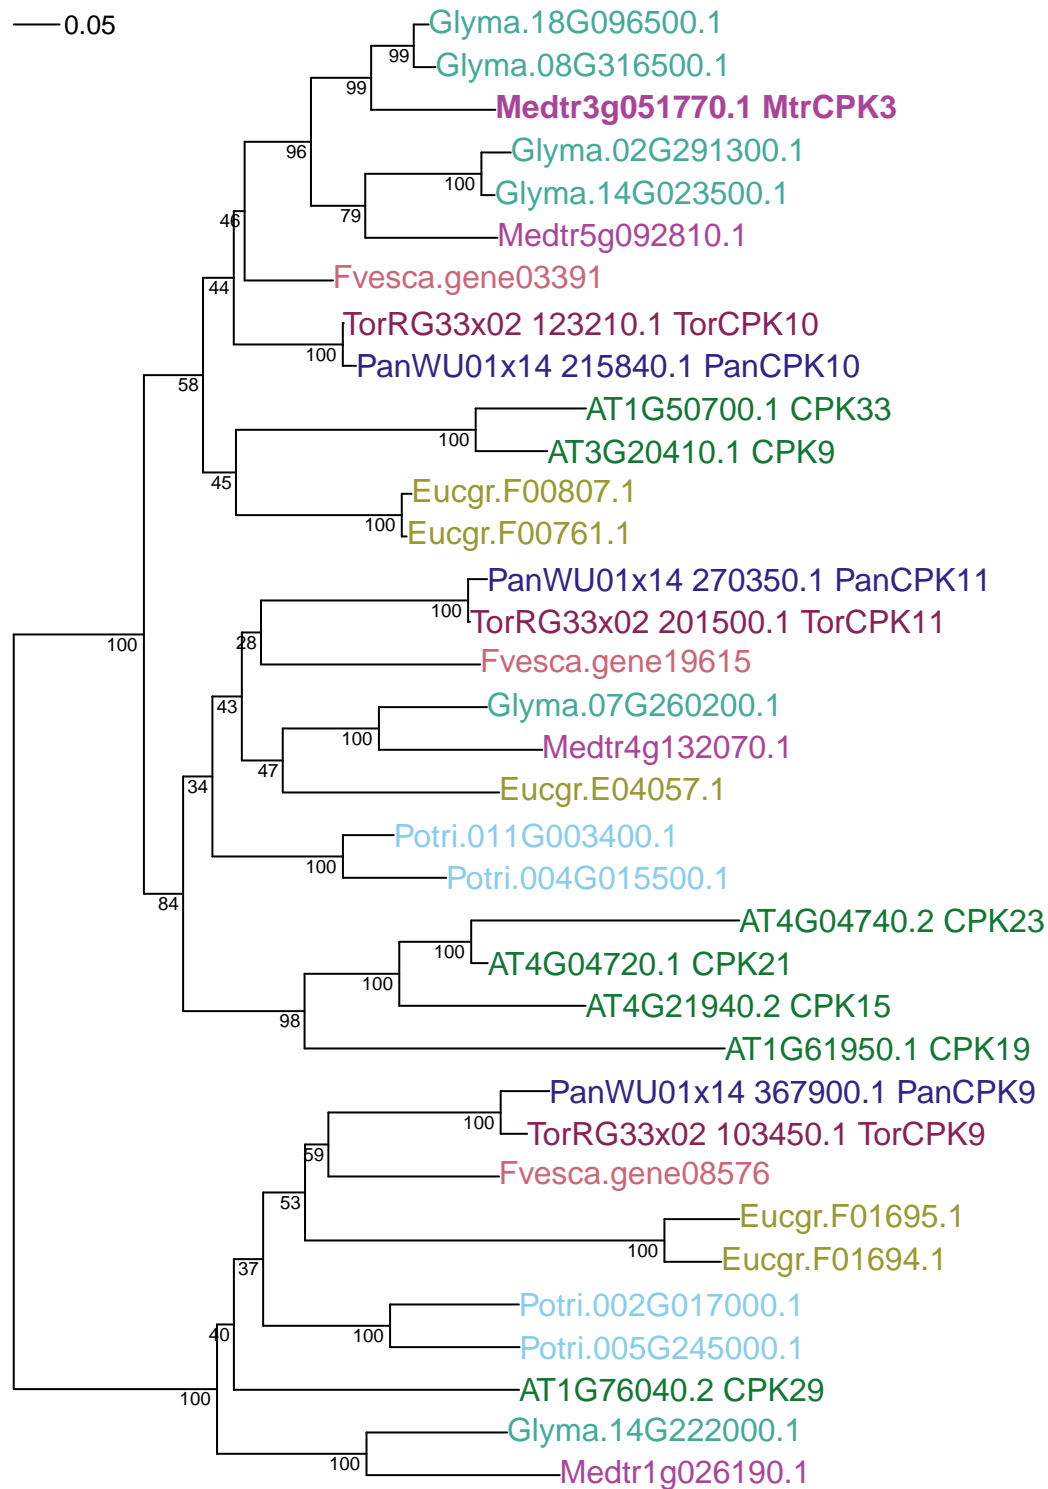

# OG0001336: Nuclear signaling. Calcium ATP-ase

— 0.05

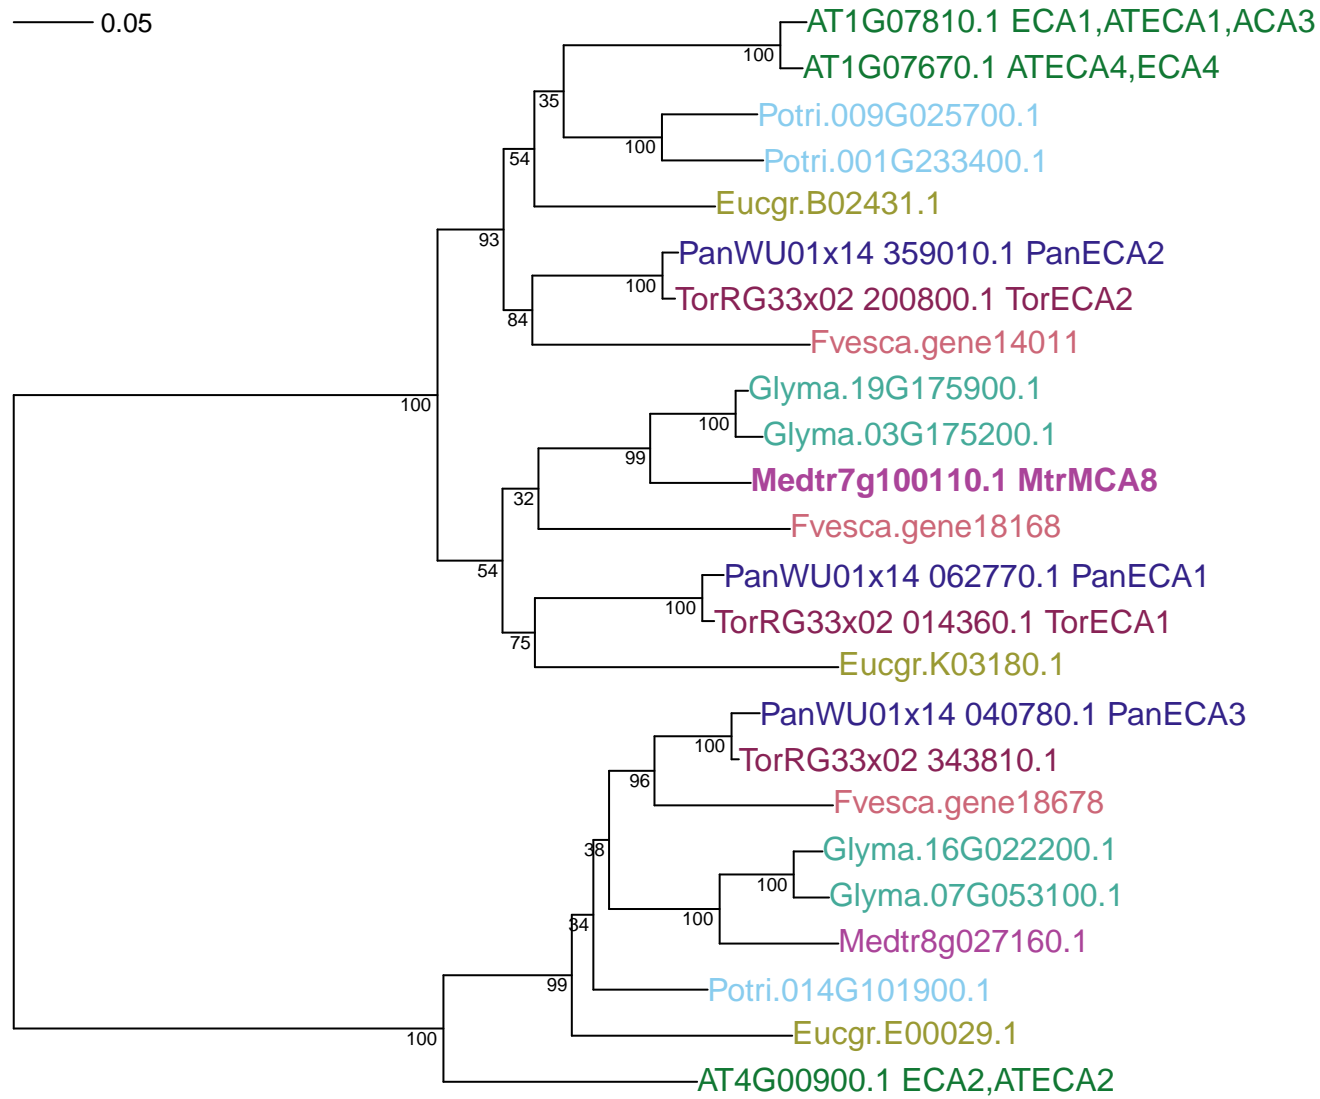

# OG0002604: Nuclear signaling. Cyclic nucleotide-gated Ca<sup>2+</sup> channel

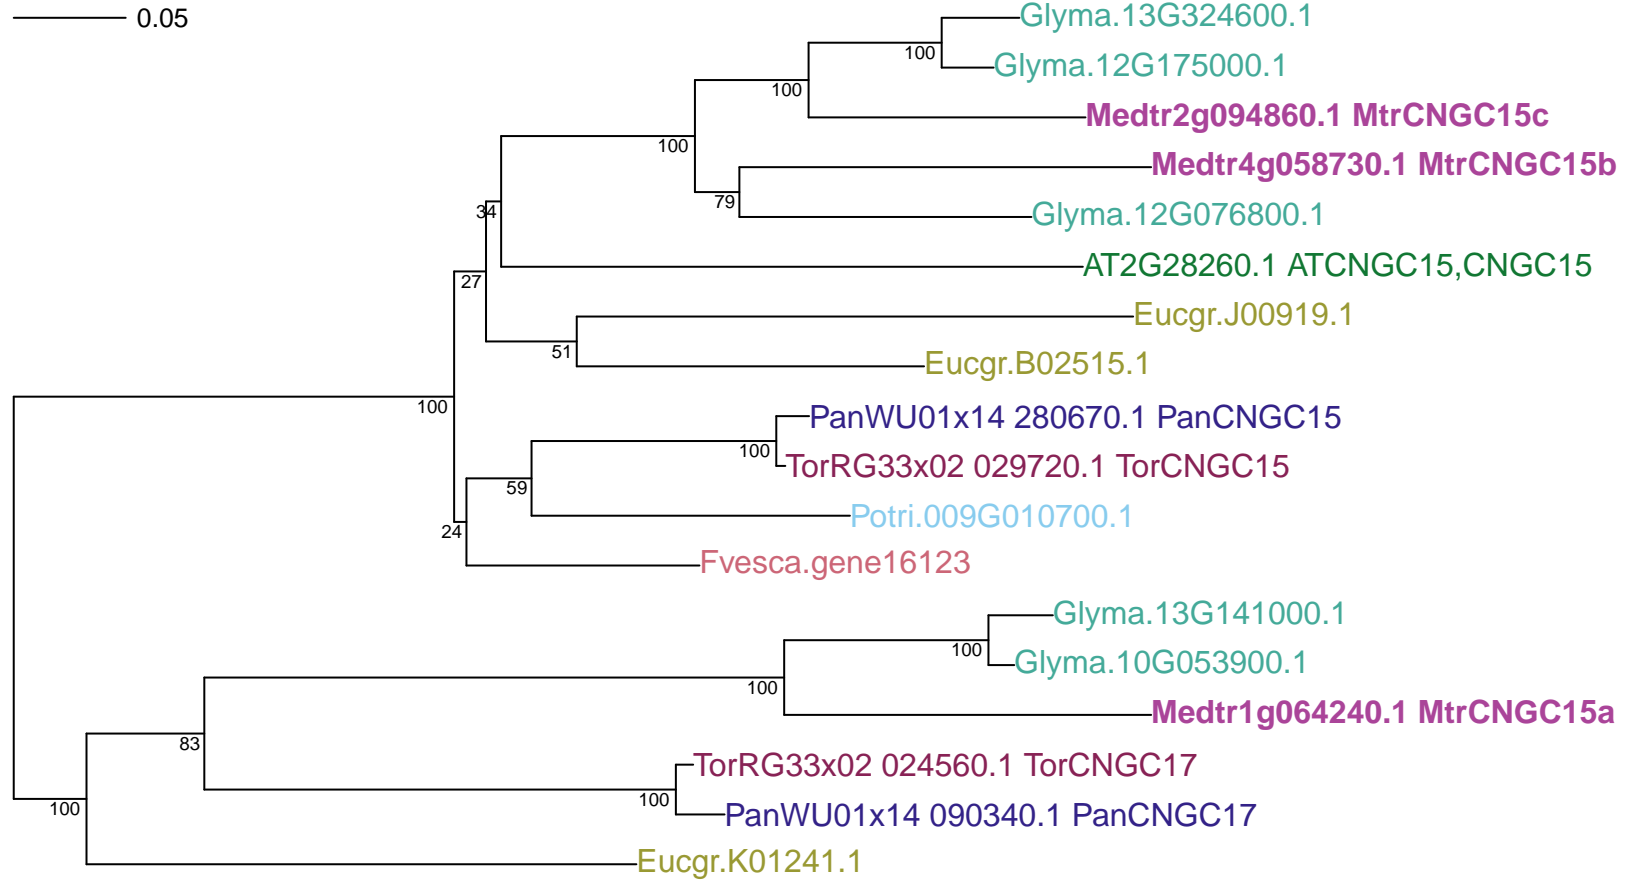



# OG0011366: Nuclear signaling. Nucleoporin

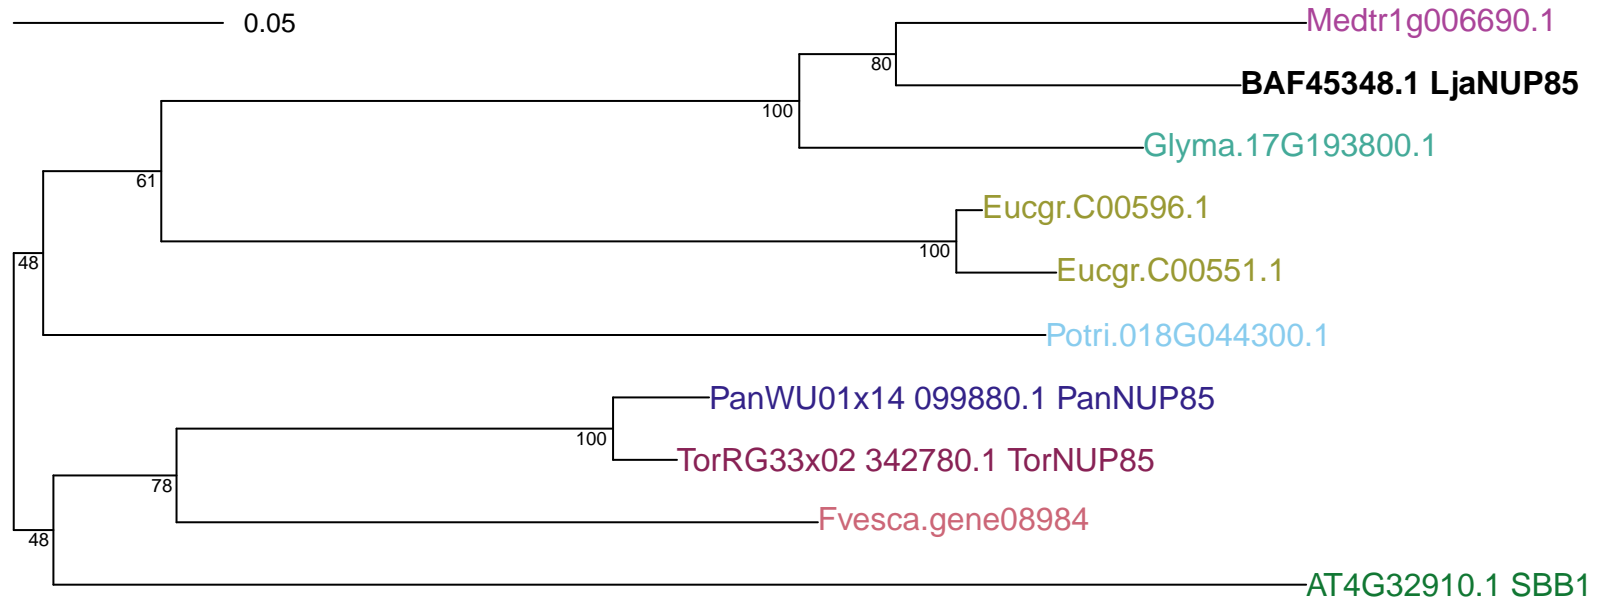

# OG0008434: Nuclear signaling. Nucleoporin

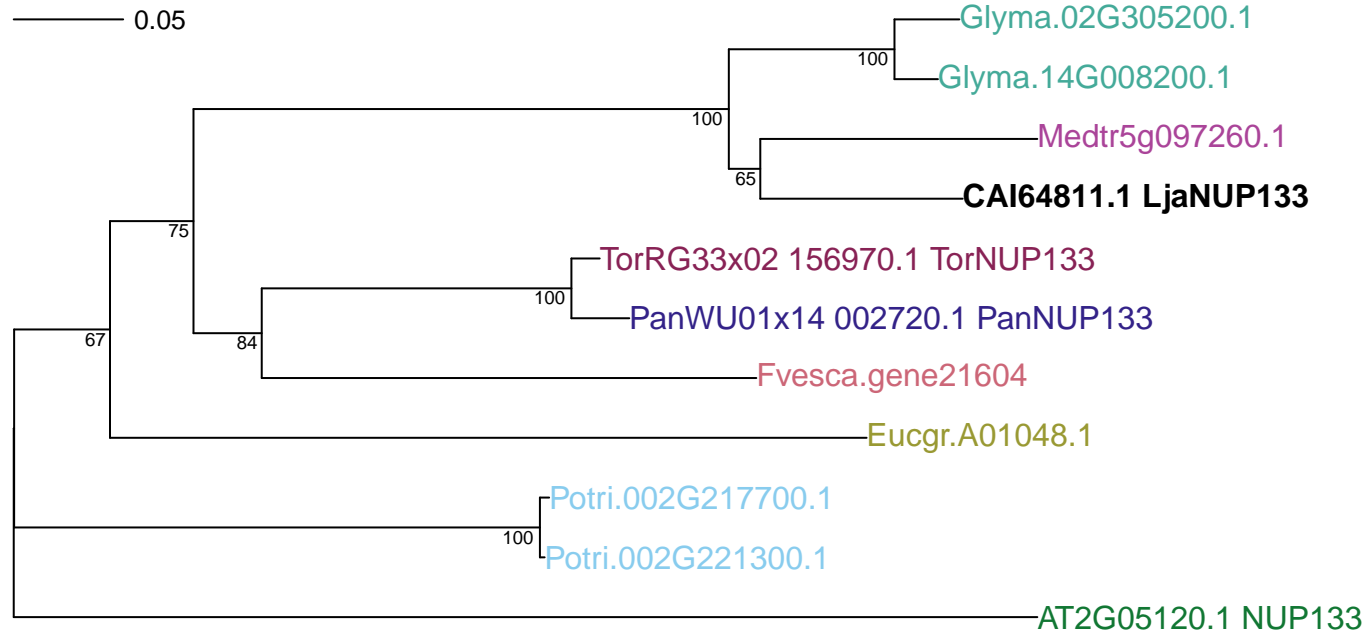

## OG0012376: Nuclear signaling. Nucleoporin

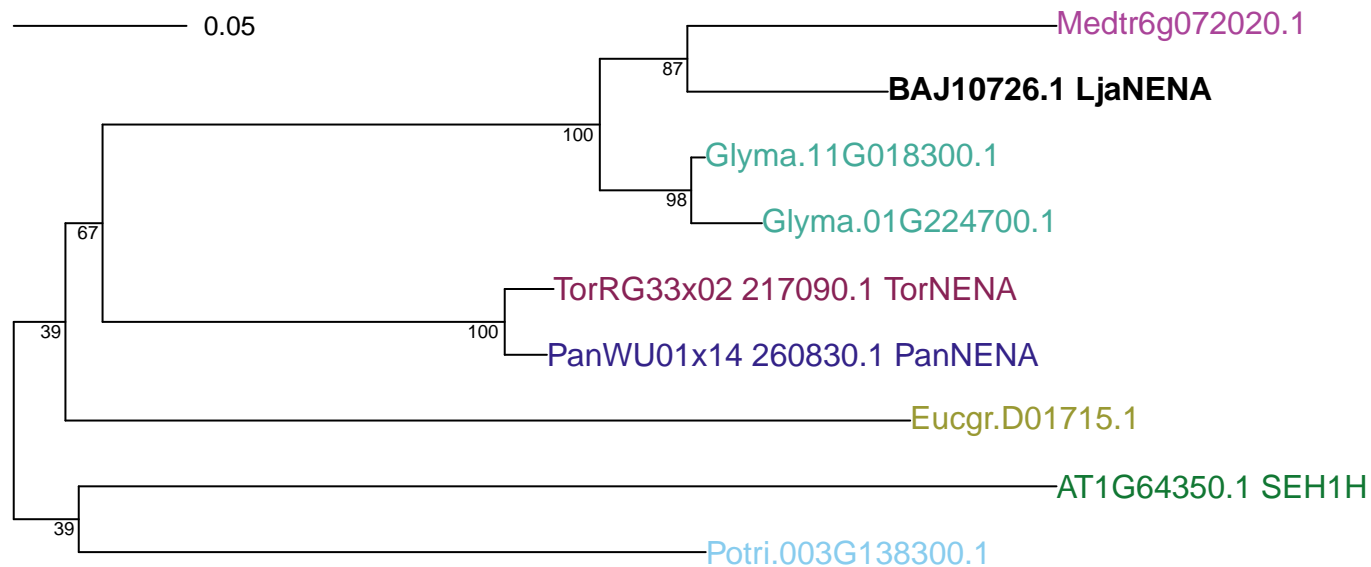

# OG0003393: Nuclear signaling. Potassium channel

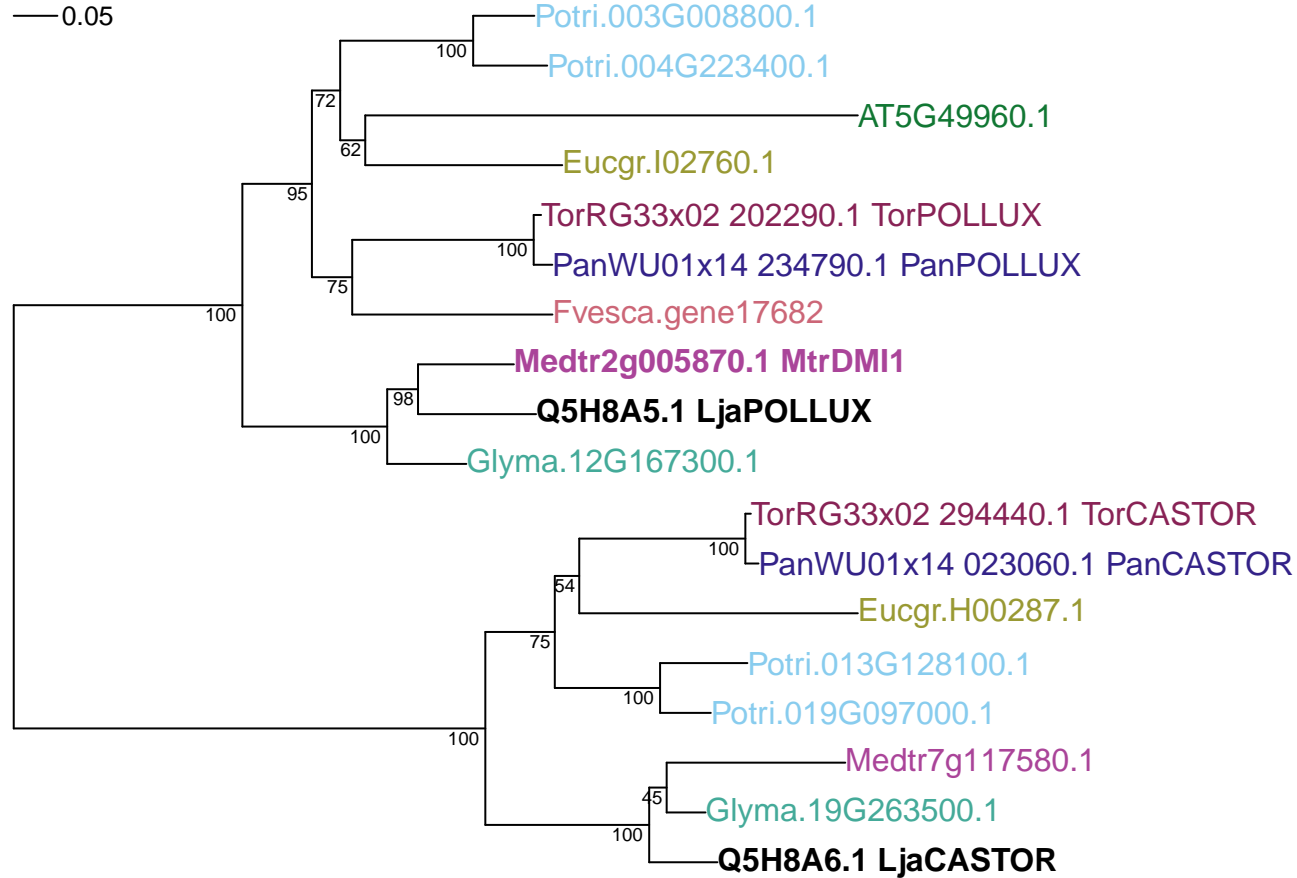

# OG0013507: Nuclear signaling. Calcium Calmodulin dependent kinase

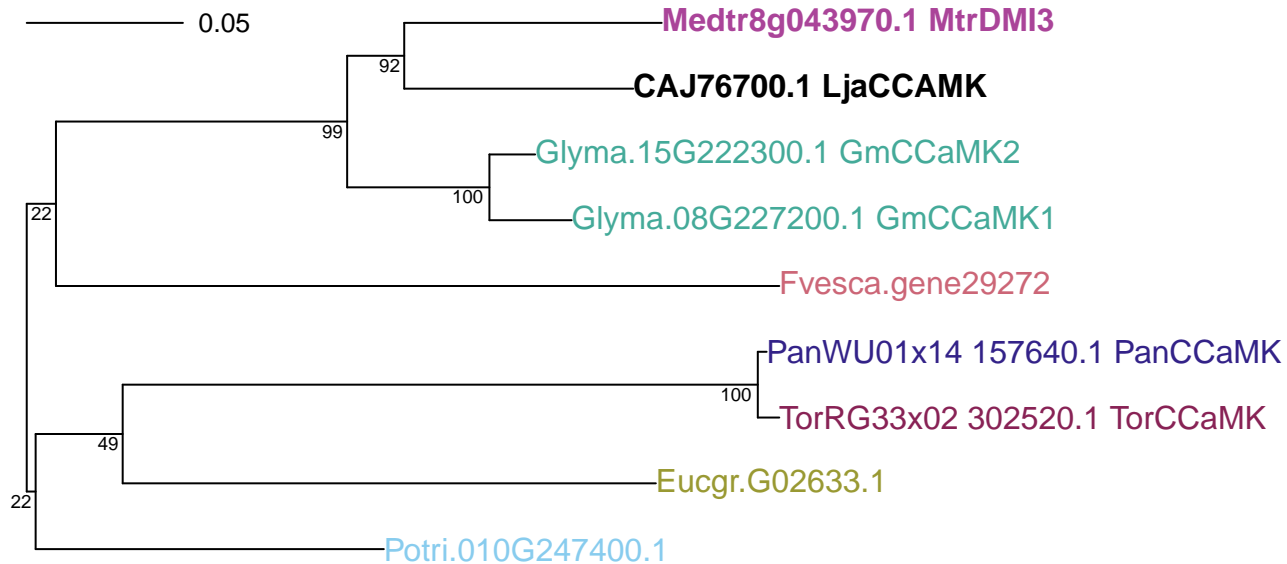

## OG0012045: Transcriptional regulators. CYCLOPS transcription factor

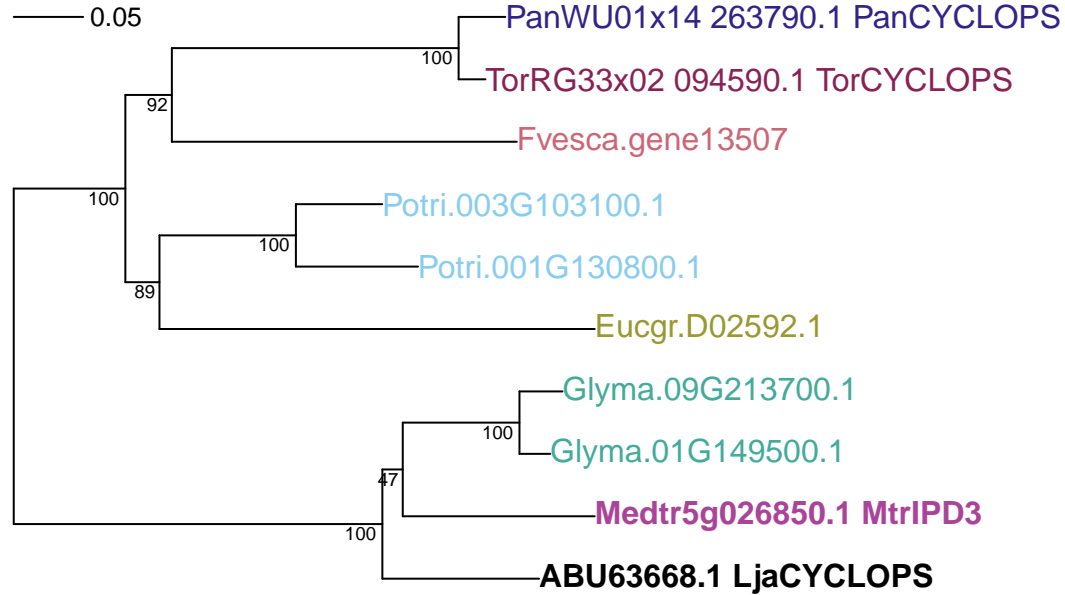

# OG0001118: Transcriptional regulators. NODULE INCEPTION transcription factor

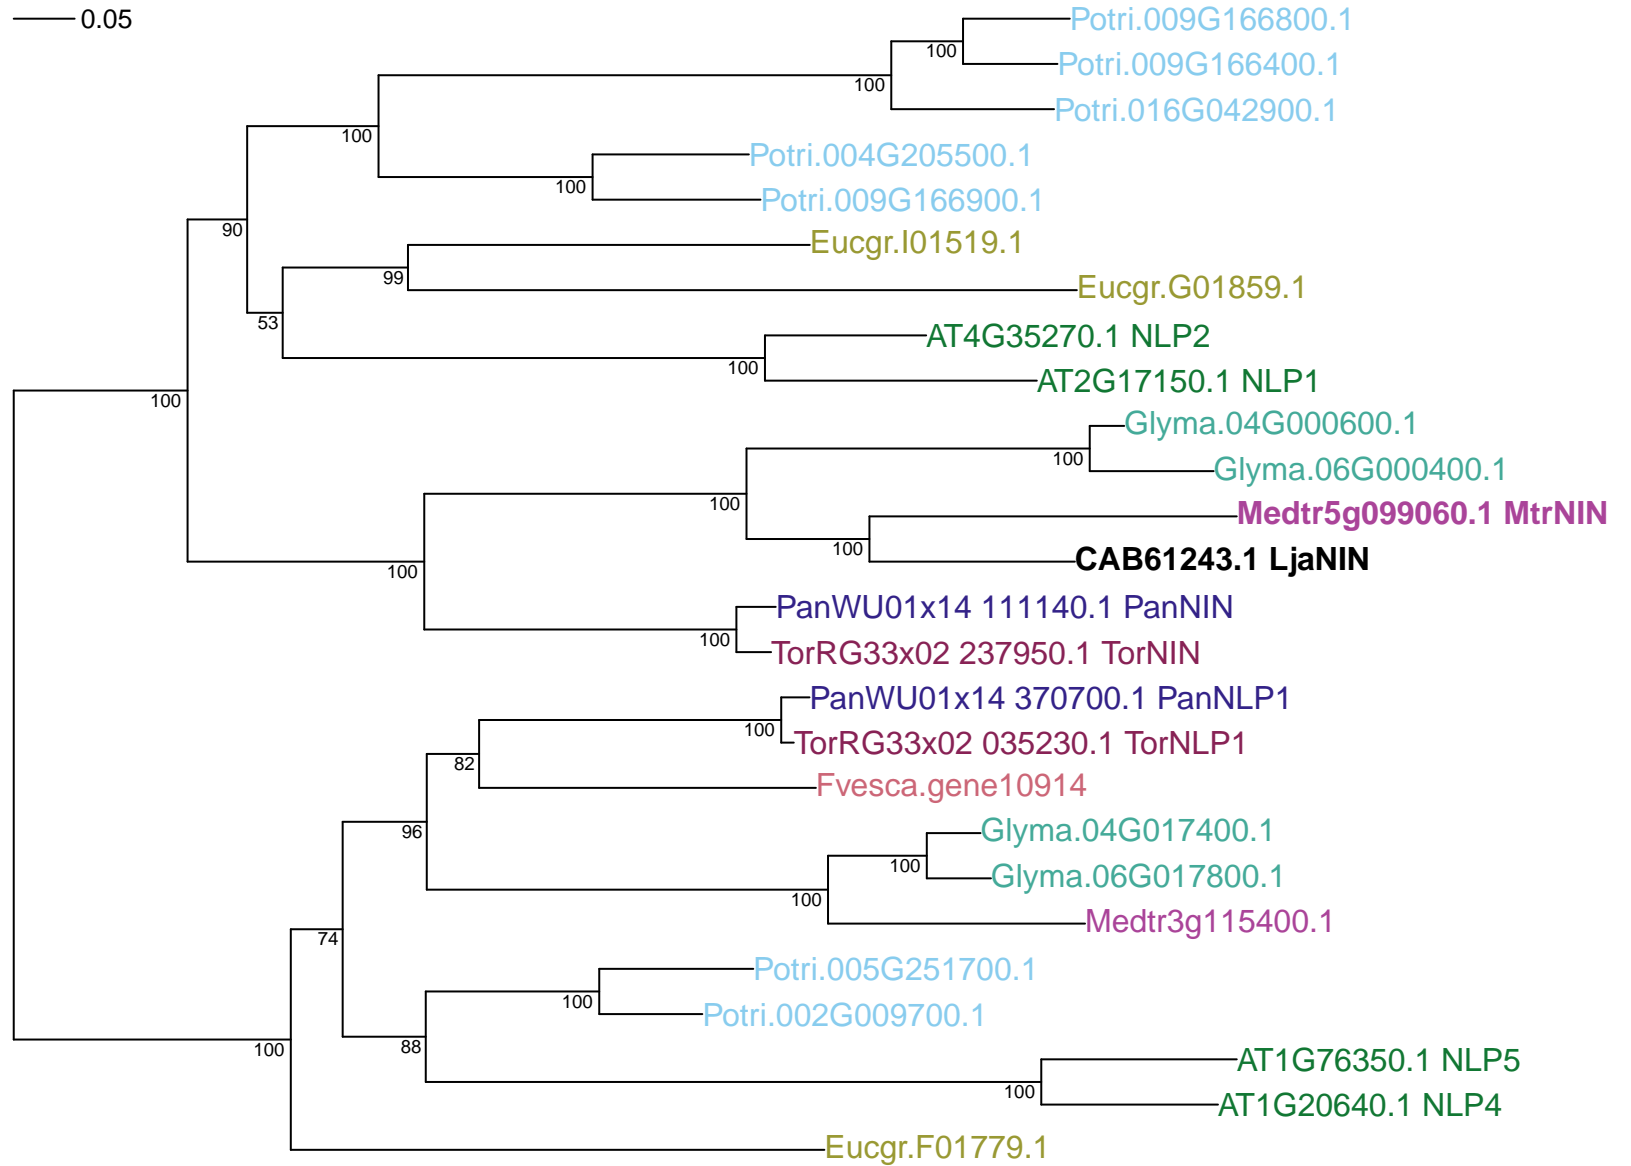

# OG0003683: Transcriptional regulators. Nuclear Factor YA transcription factor

—0.05

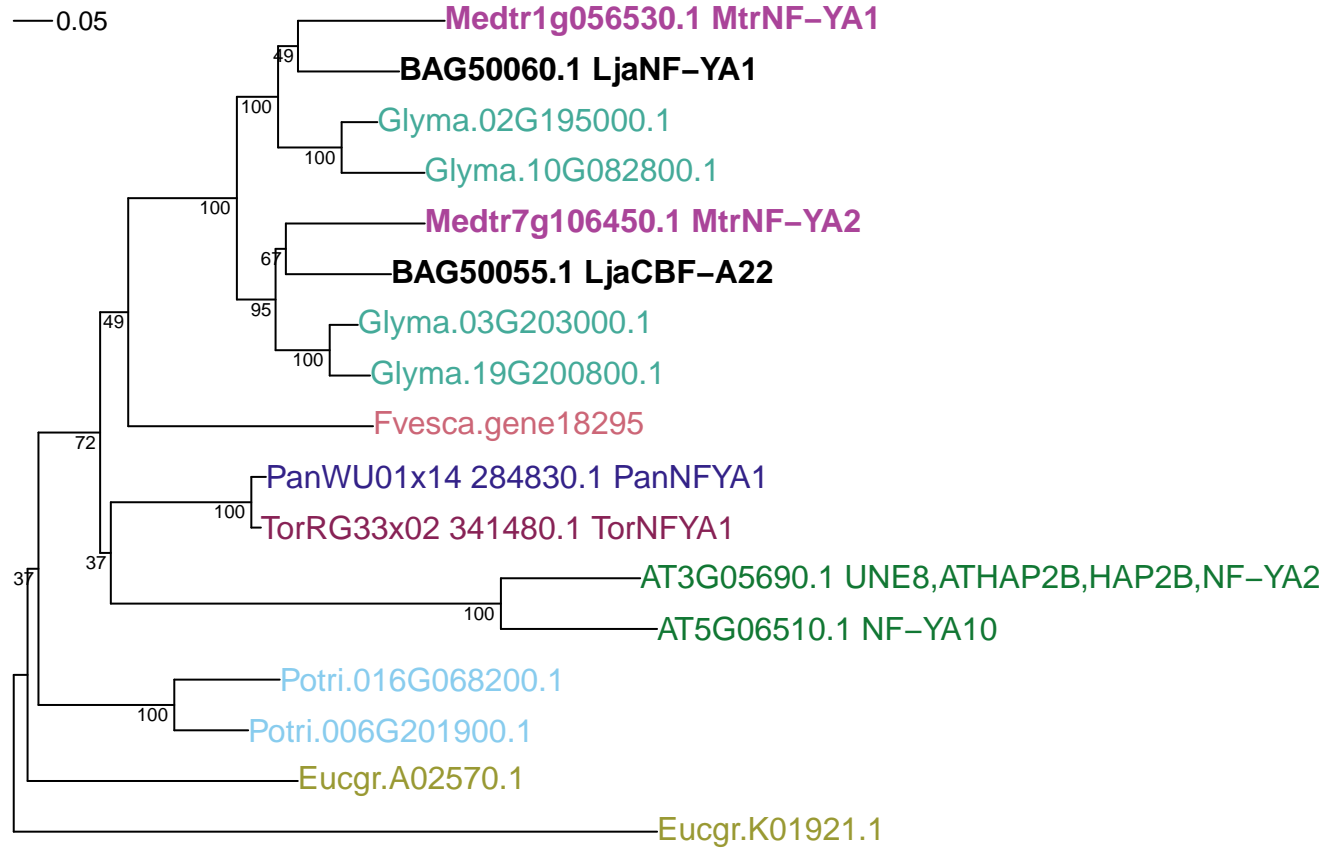



# OG0000523: Transcriptional regulators. Nuclear Factor YB transcription factor

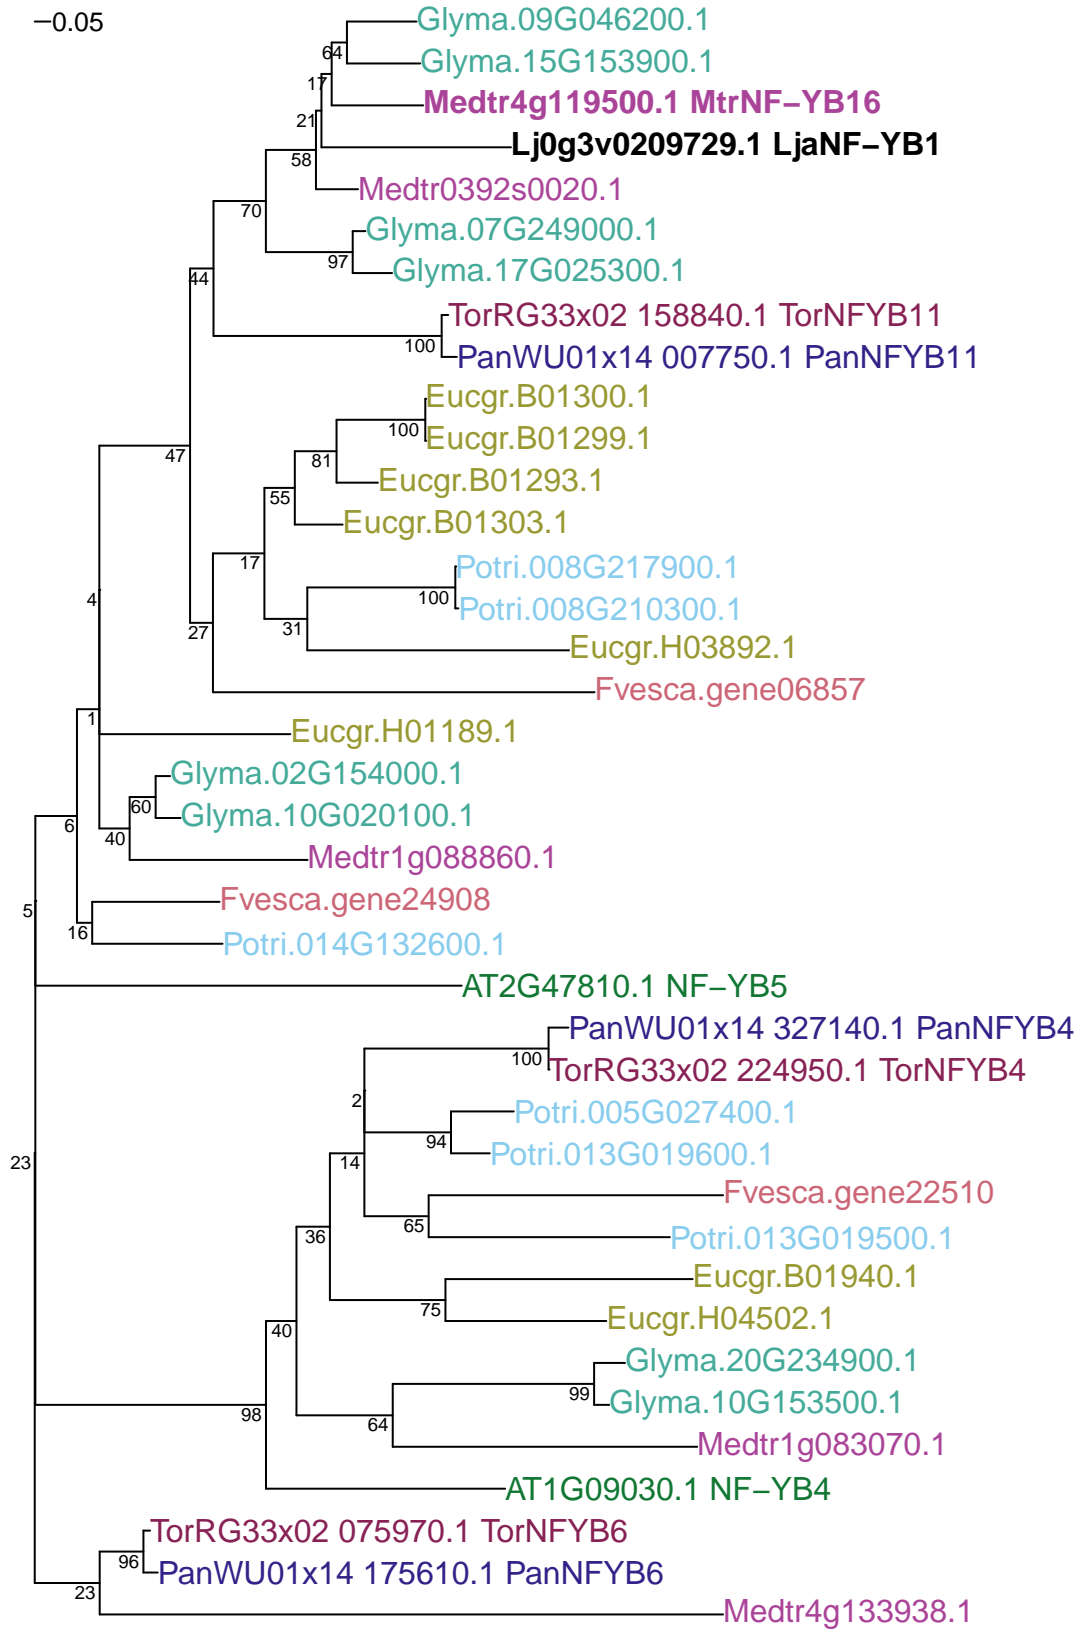

# OG0002046: Transcriptional regulators. Nuclear Factor YC transcription factor

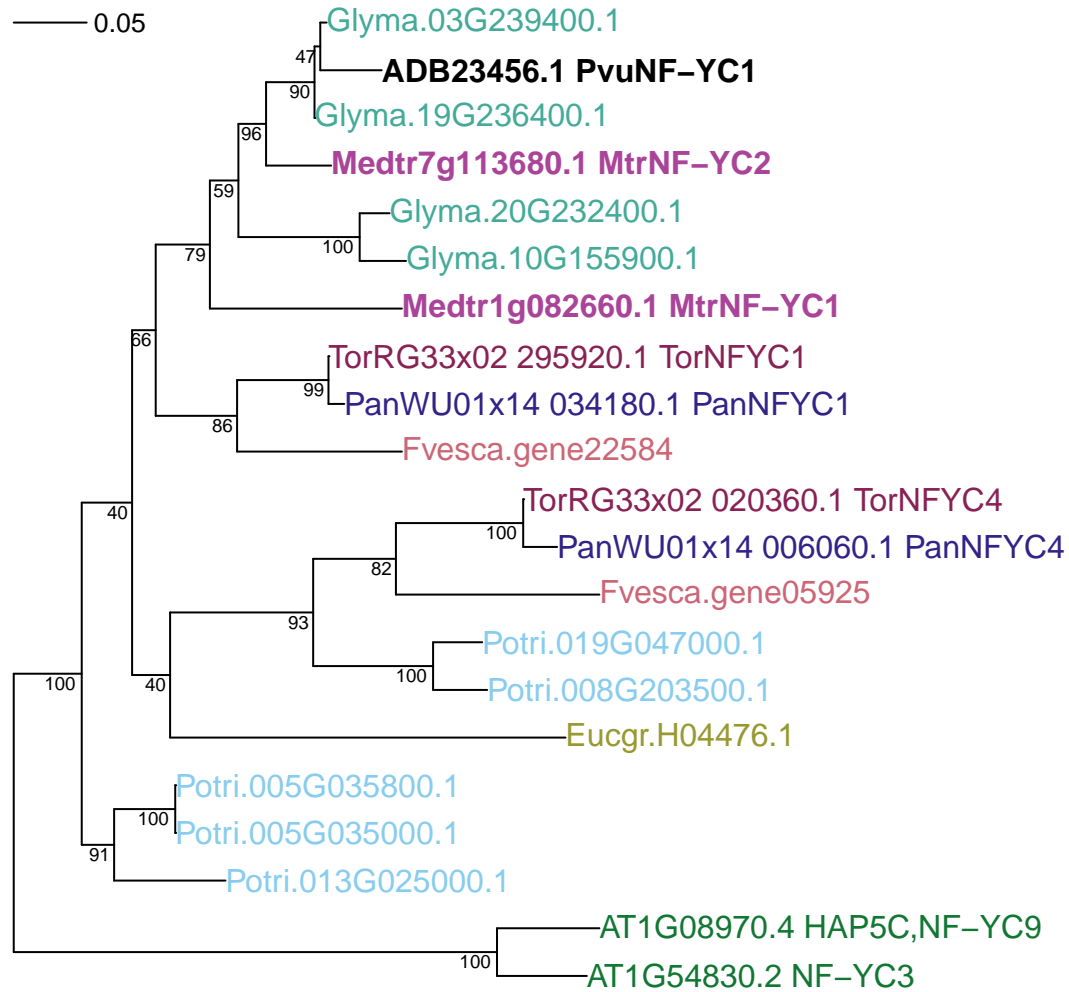

# OG0003025: Transcriptional regulators. AP2-ERF transcription factor

—0.05

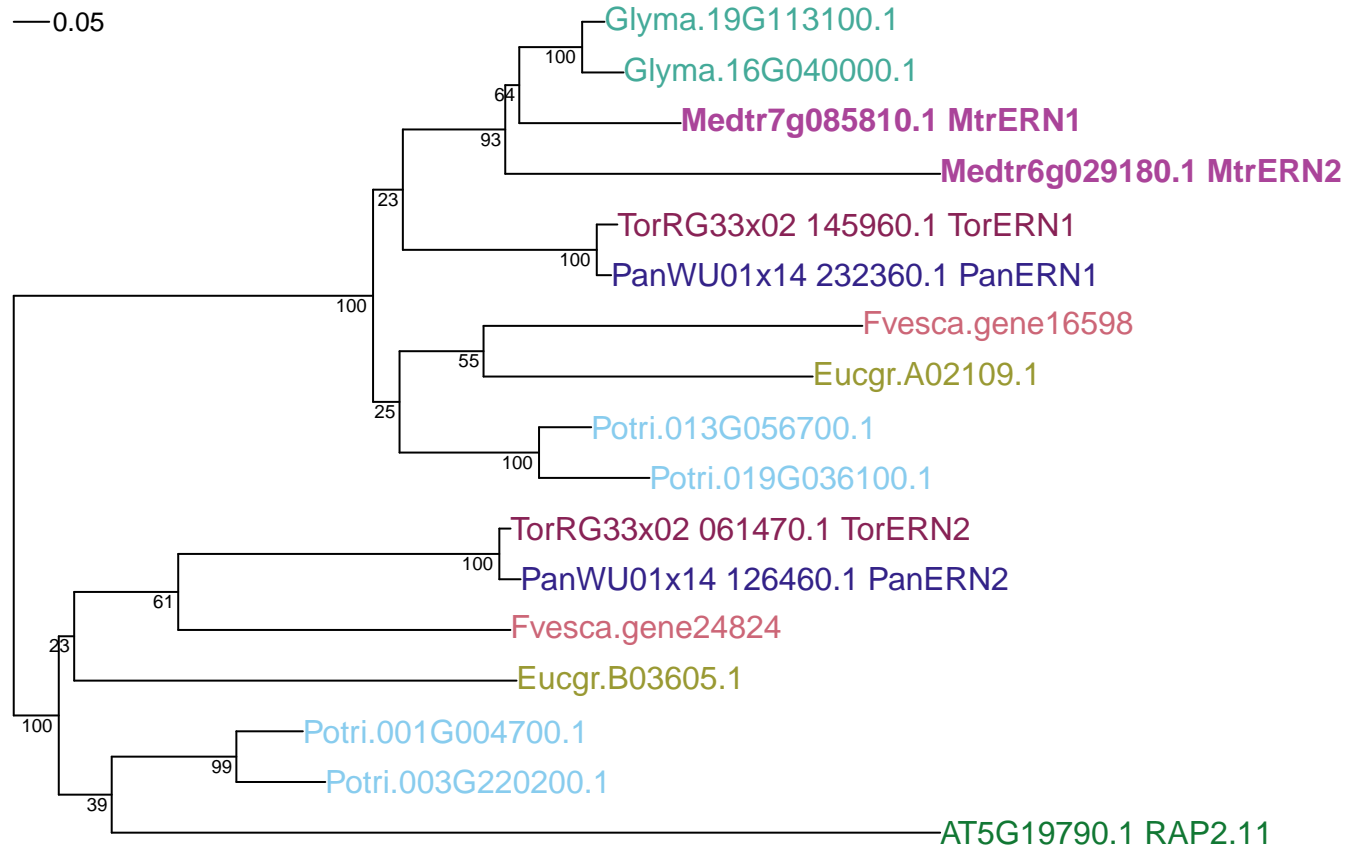

# OG0001539: Transcriptional regulators. AP2-ERF transcription factor

— 0.05

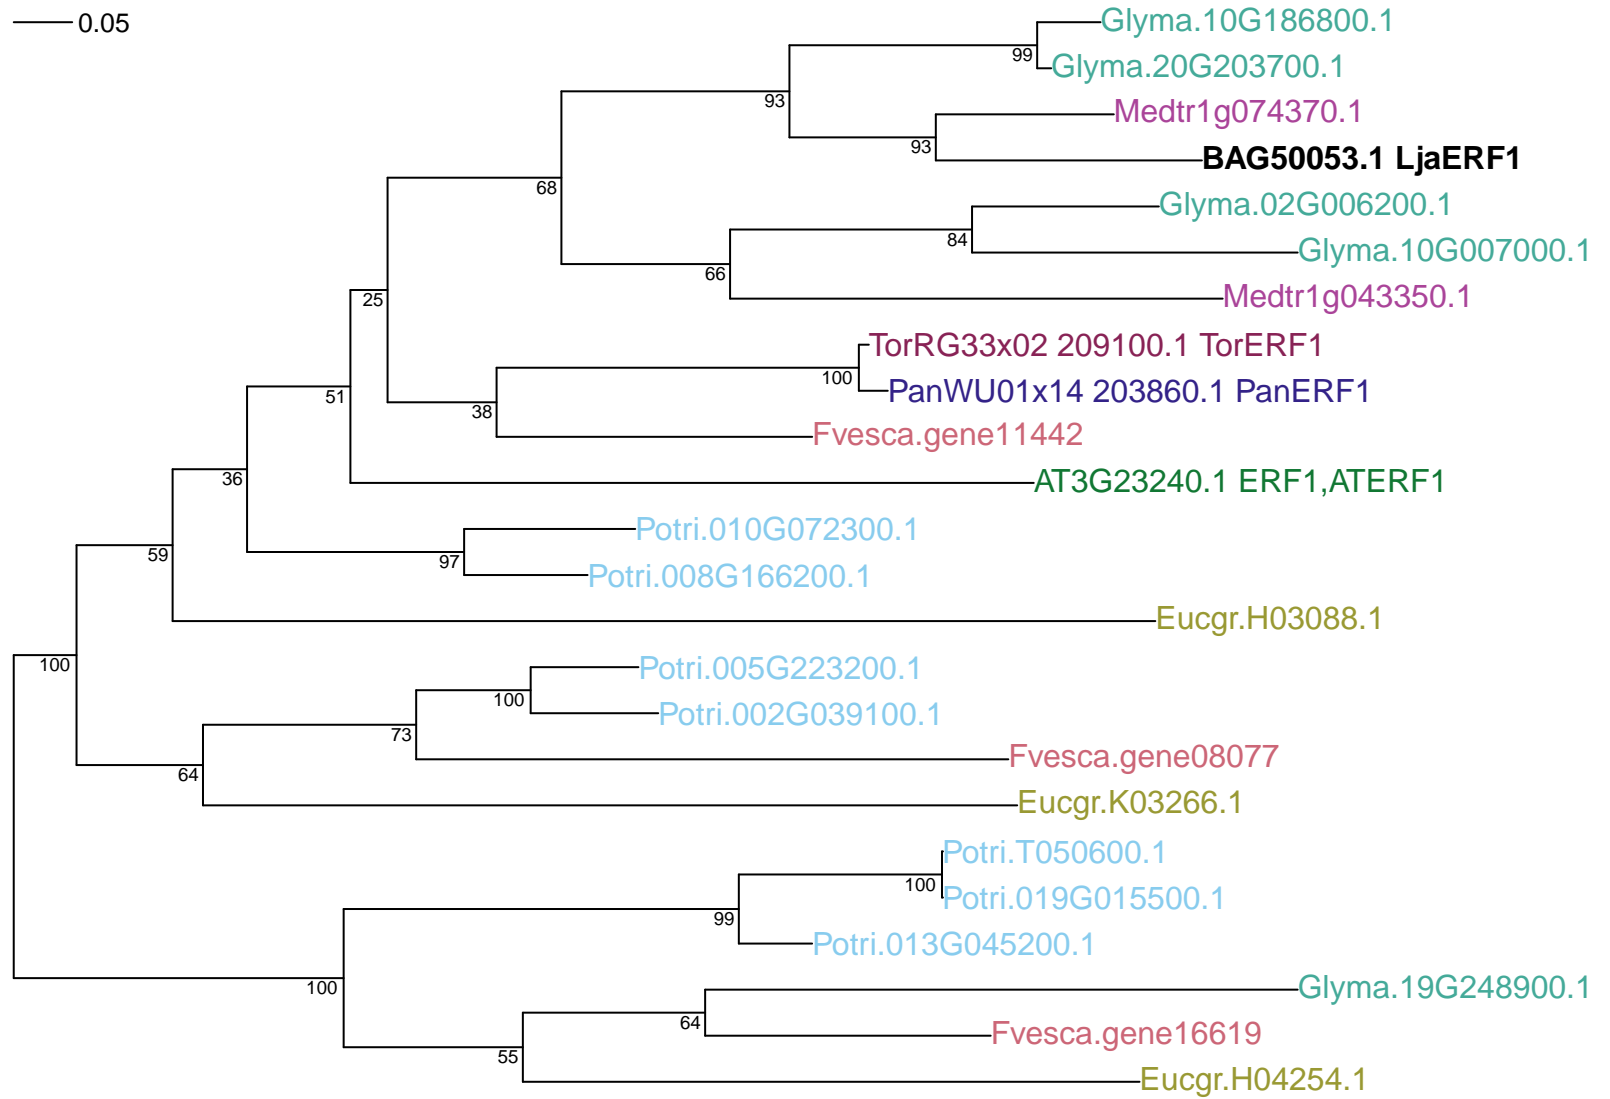

# OG0001773: Transcriptional regulators. AP2-ERF transcription factor

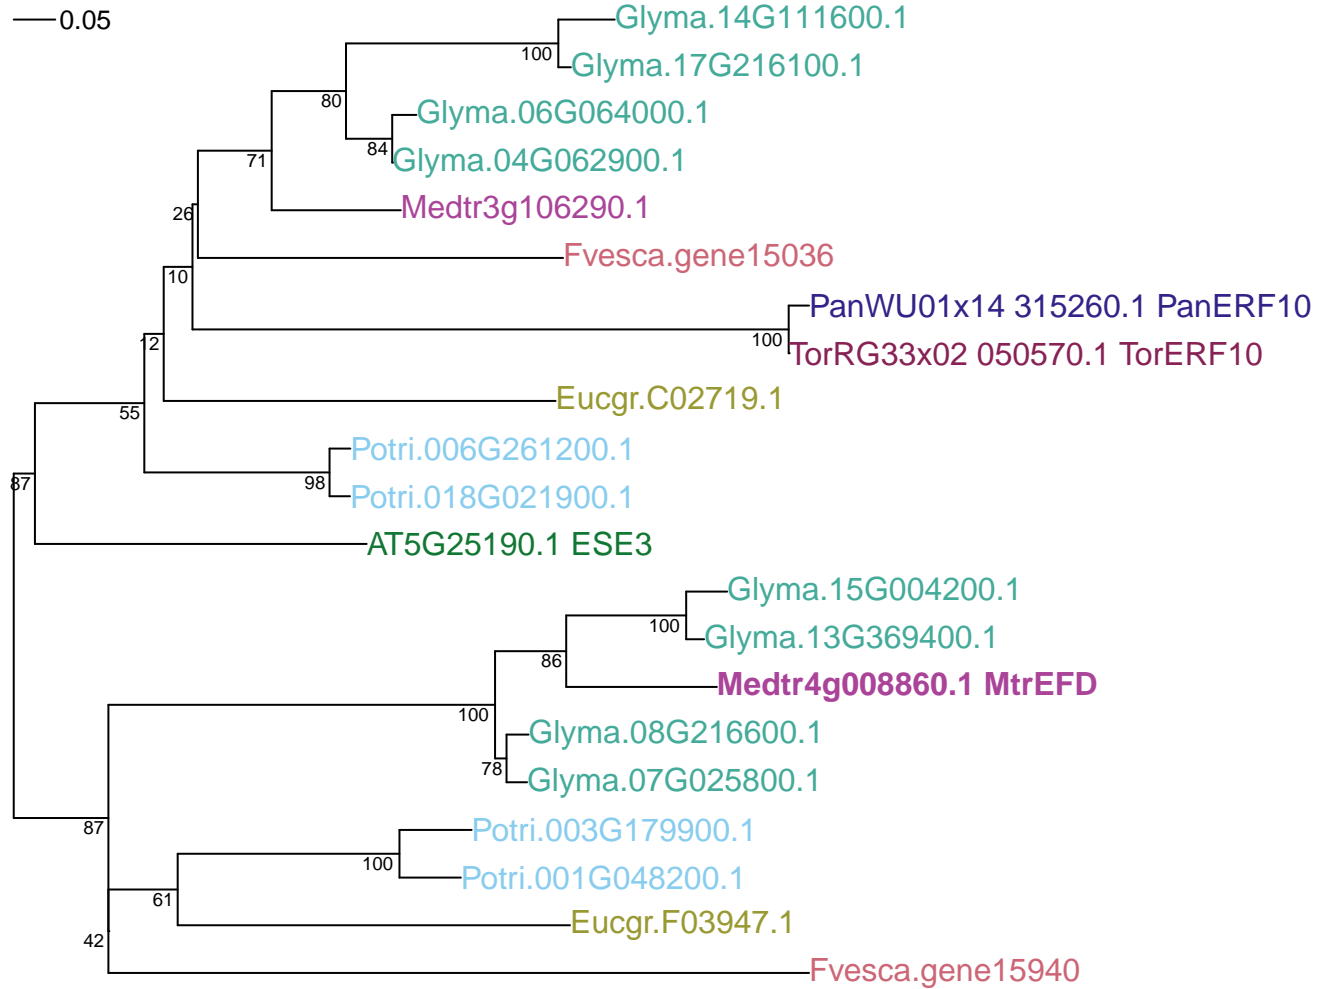

# OG0008769: Transcriptional regulators. GRAS-type transcriptional regulator

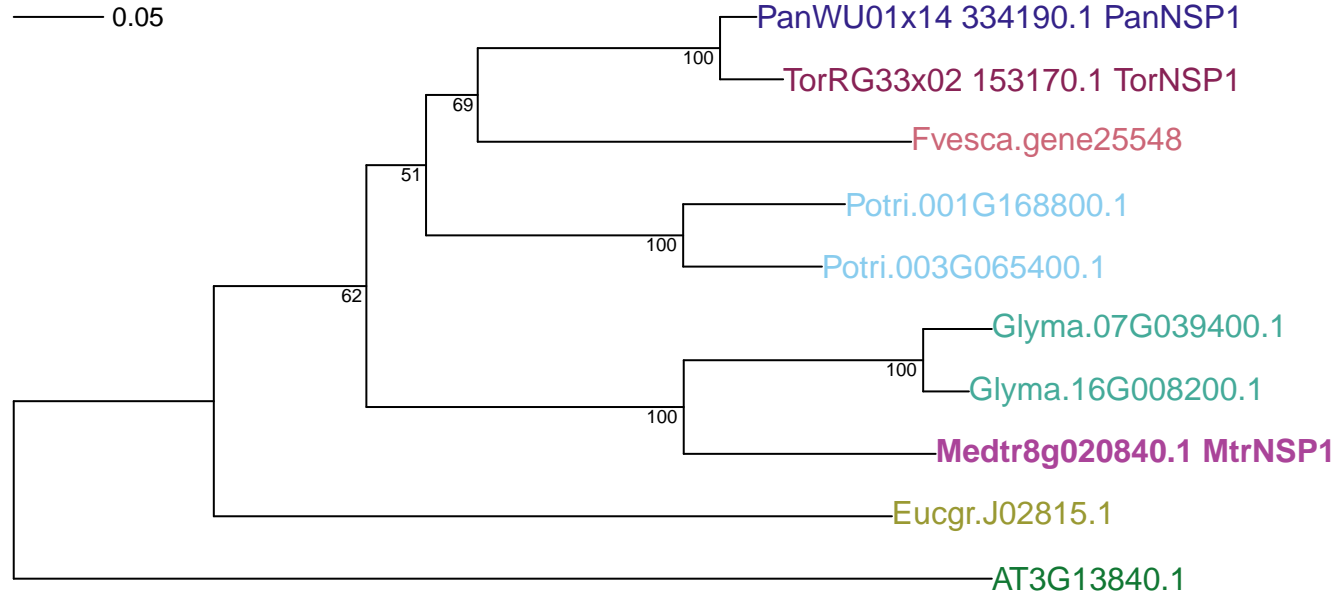

# OG0006113: Transcriptional regulators. GRAS-type transcriptional regulator

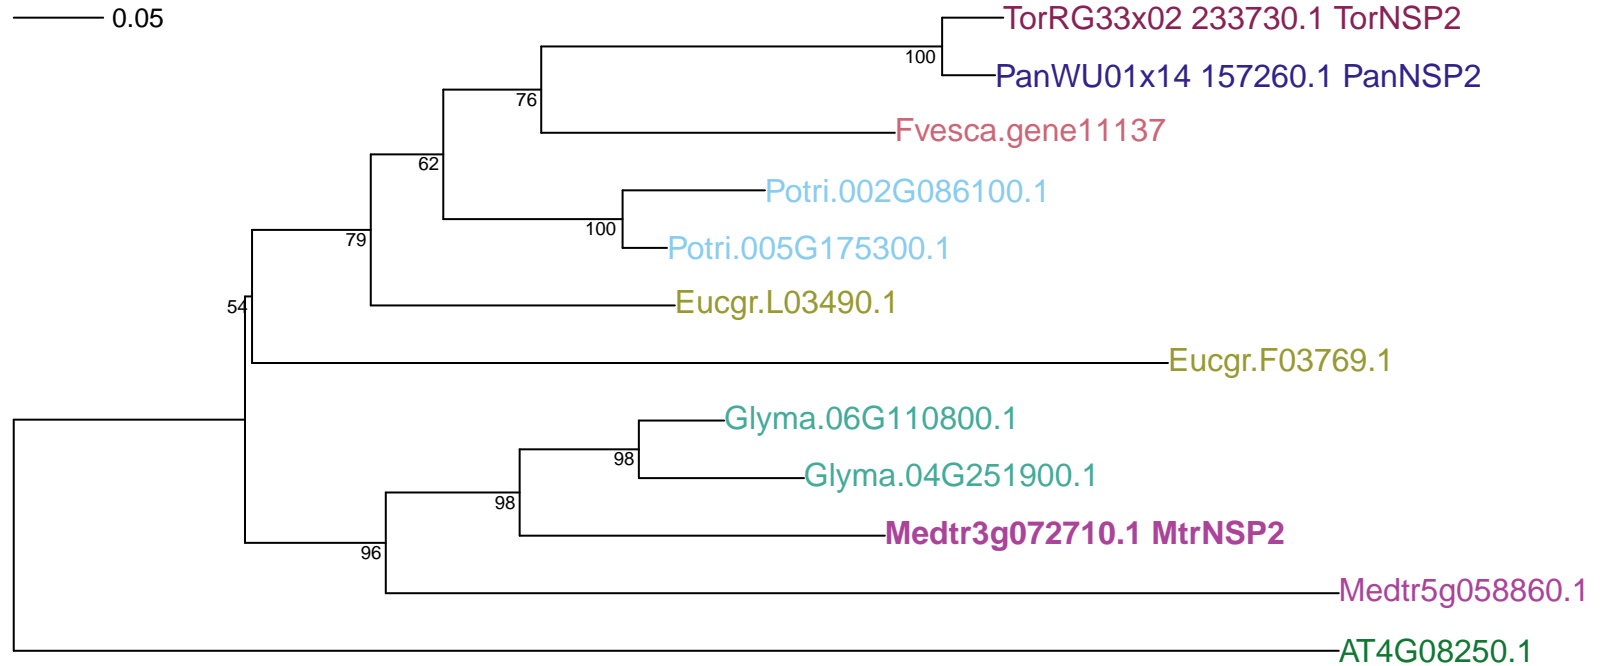

# OG0013541: Transcriptional regulators. GRAS-type transcriptional regulator

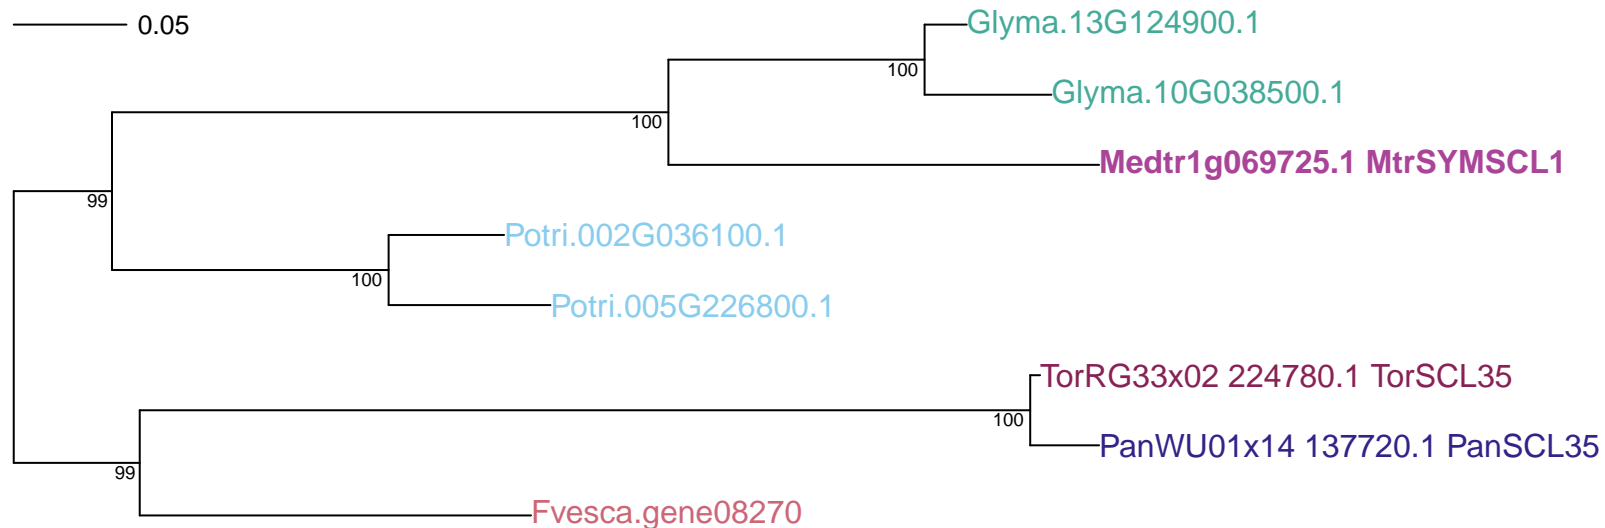



# OG0000482: Transcriptional regulators. bHLH transcription factor

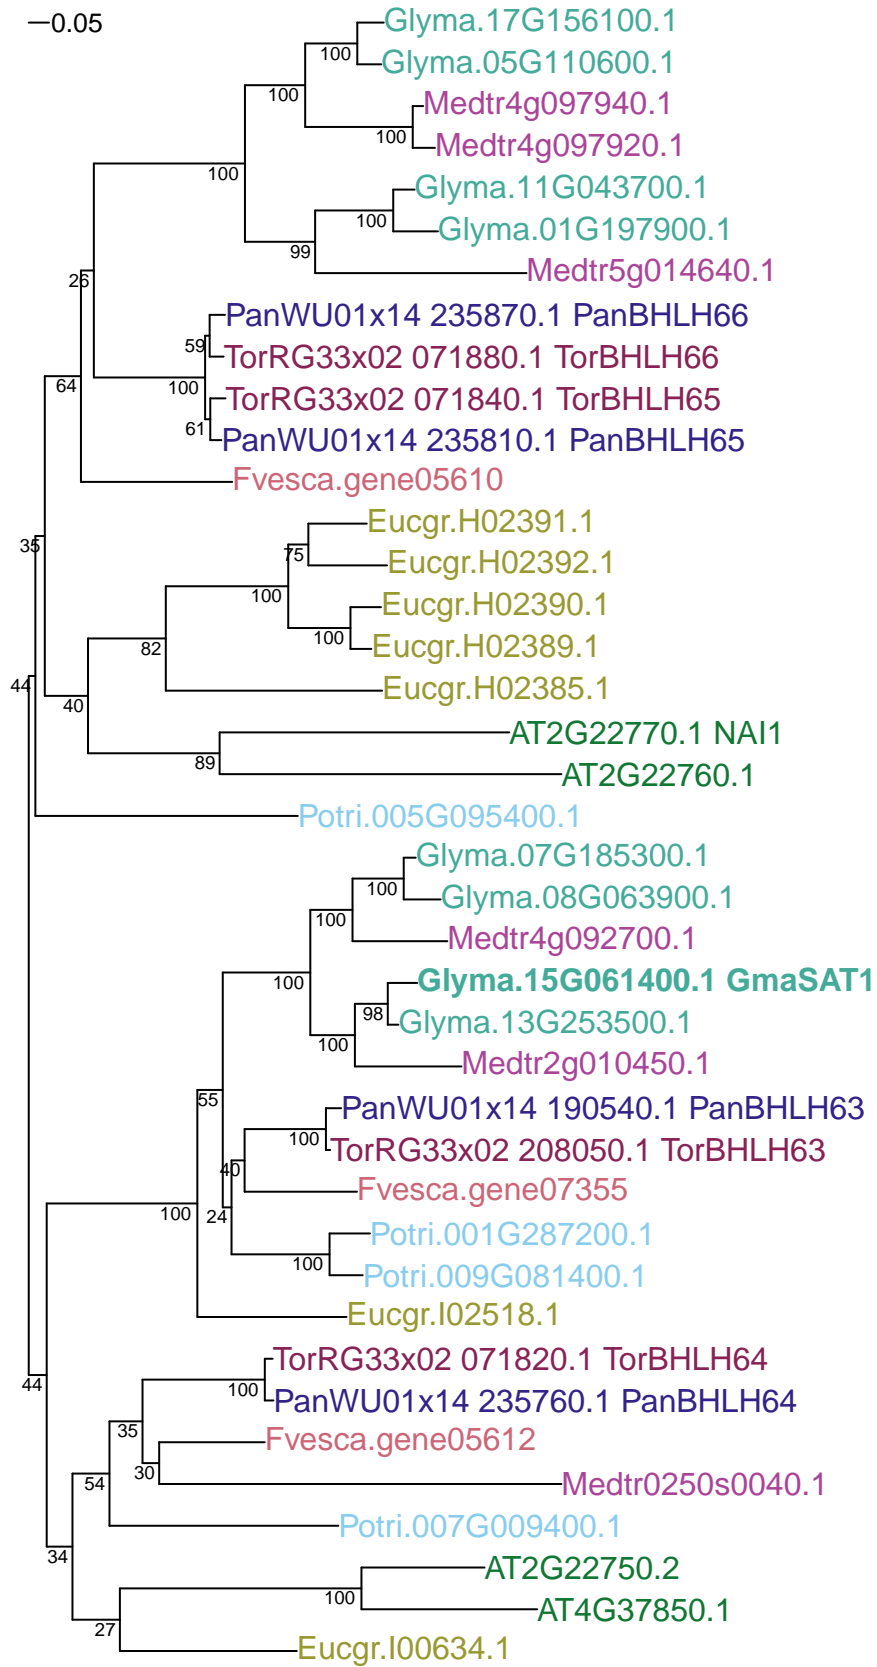

# OG0000817: Transcriptional regulators. bHLH transcription factor

—0.05

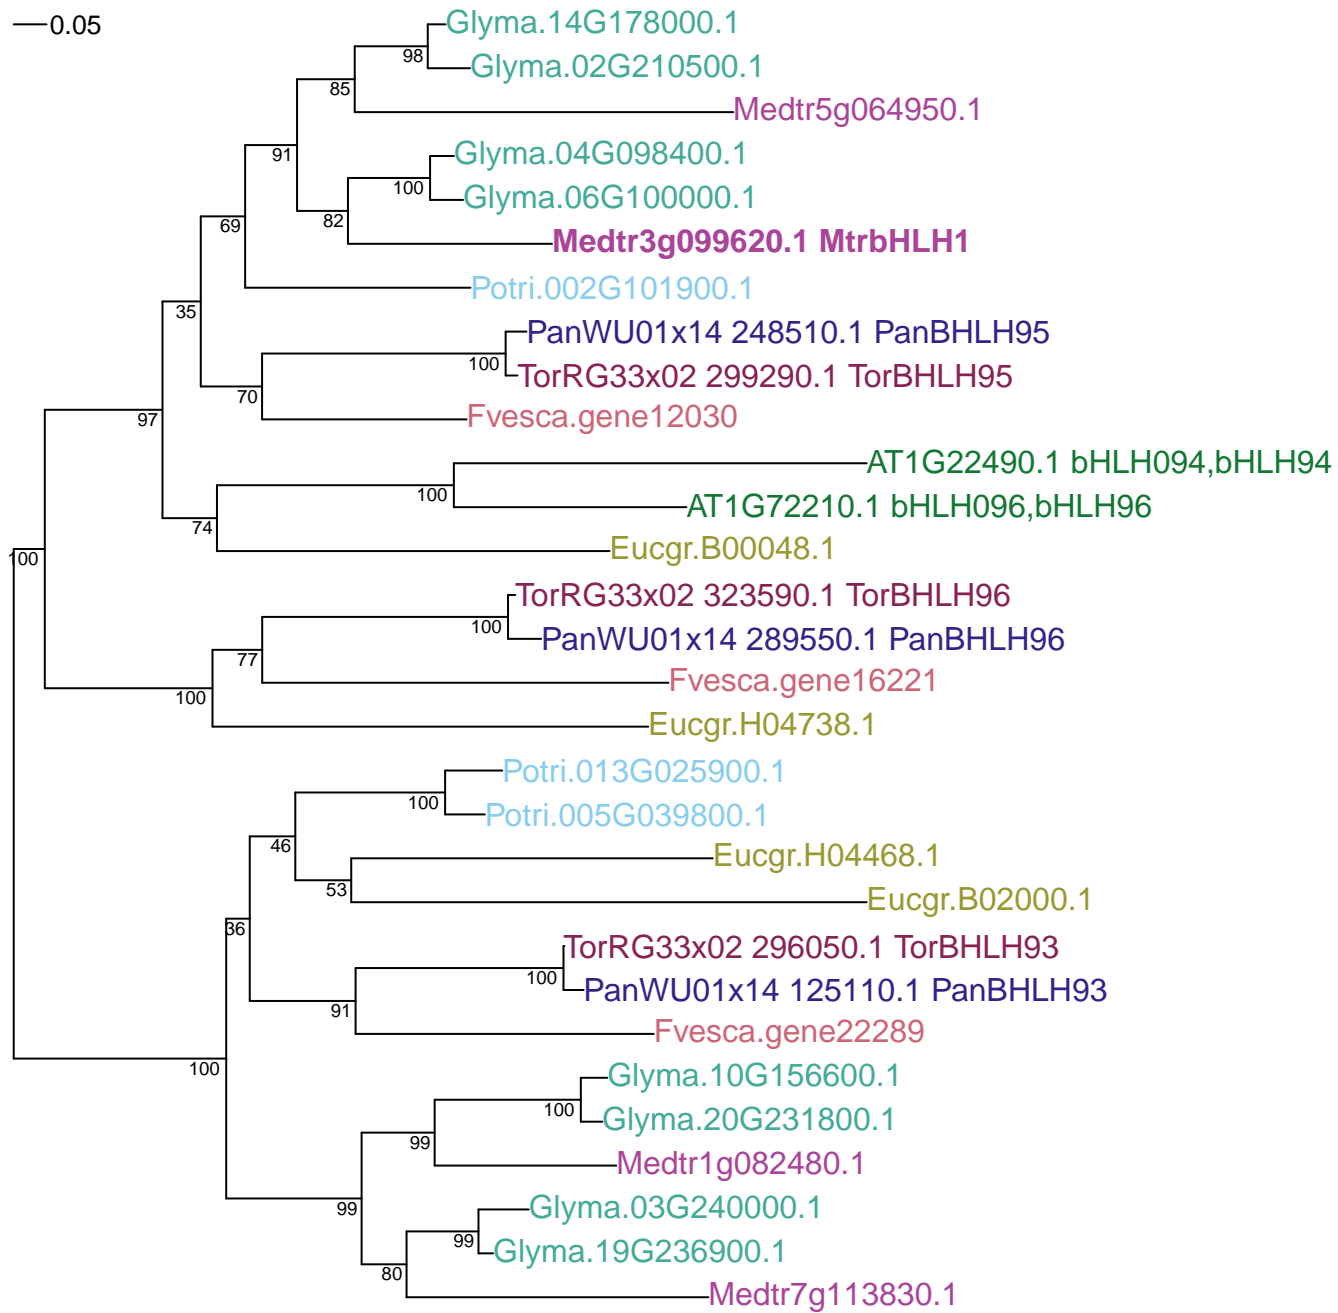

# OG0004789: Transcriptional regulators. BOP-type transcriptional regulator

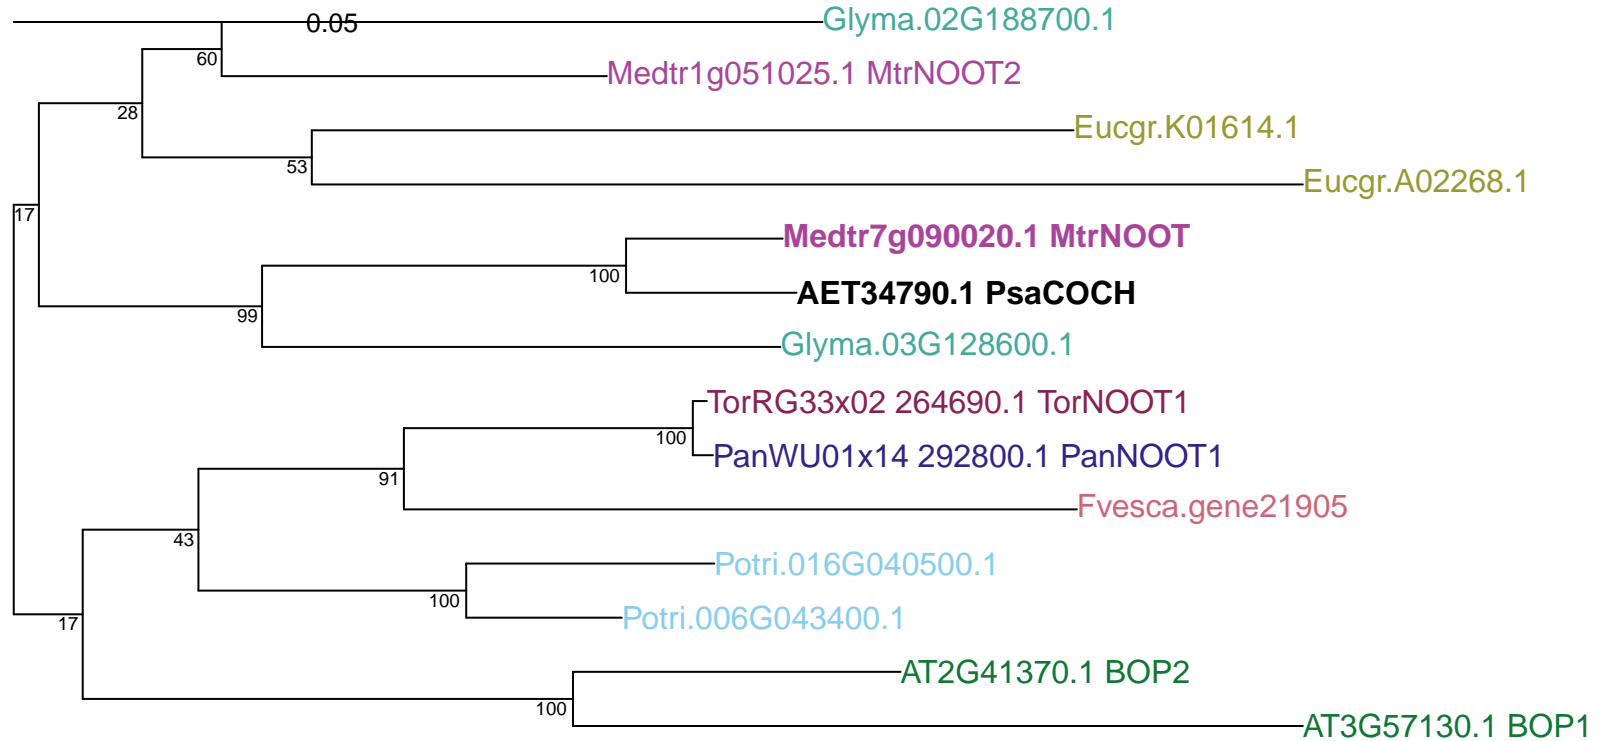

# OG0001033: Transcriptional regulators. C2H2 transcription factor

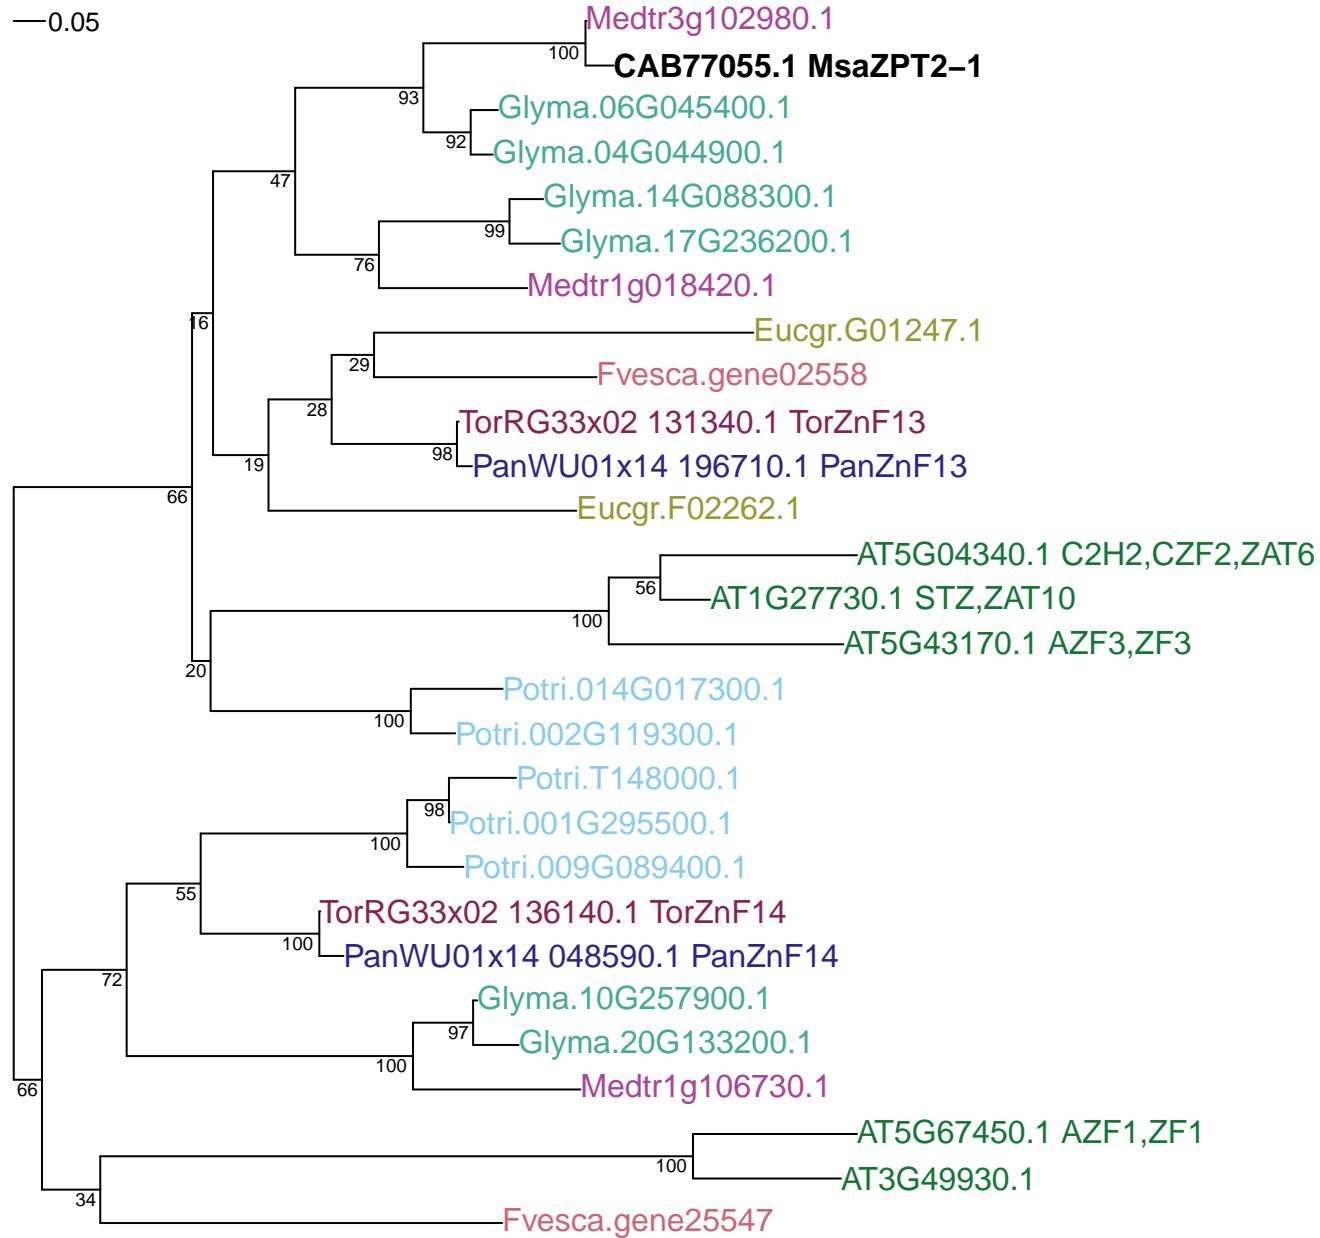

# OG0002397: Transcriptional regulators. C2H2 transcription factor

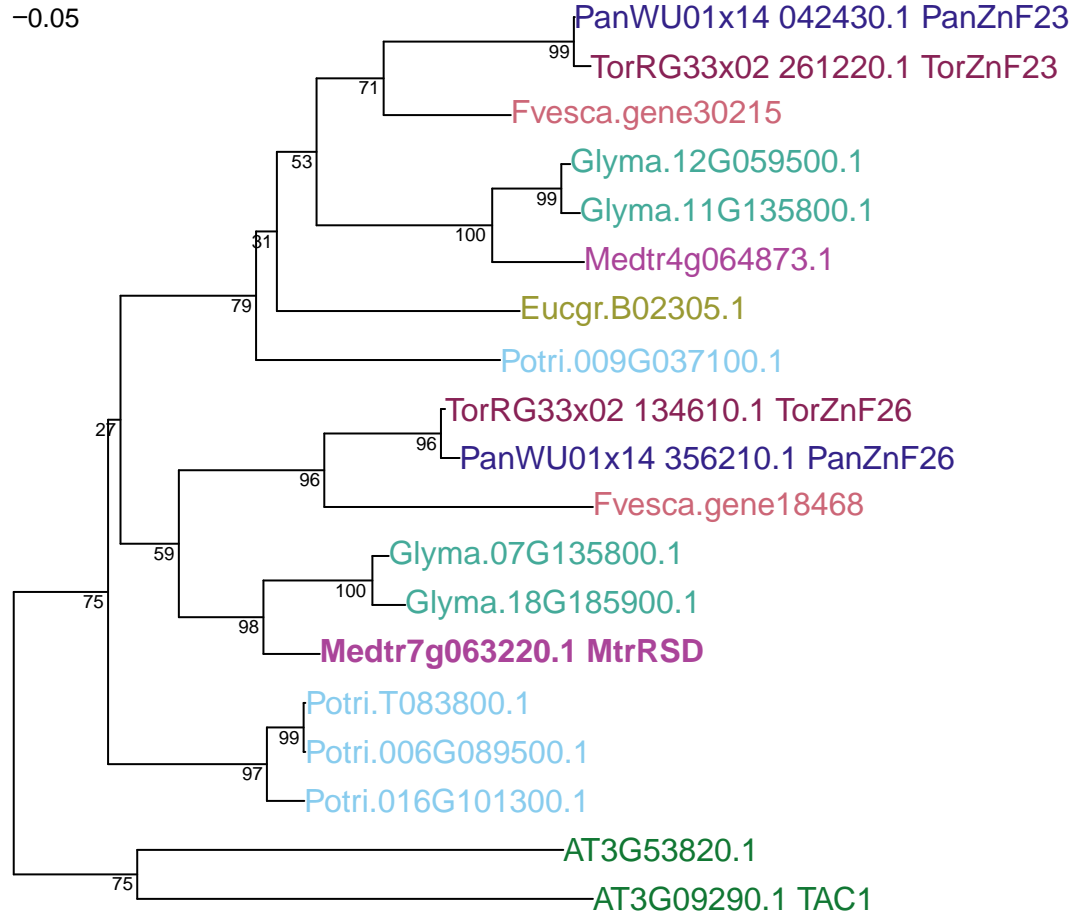

# OG0005509: Transcriptional regulators. NAC transcription factor

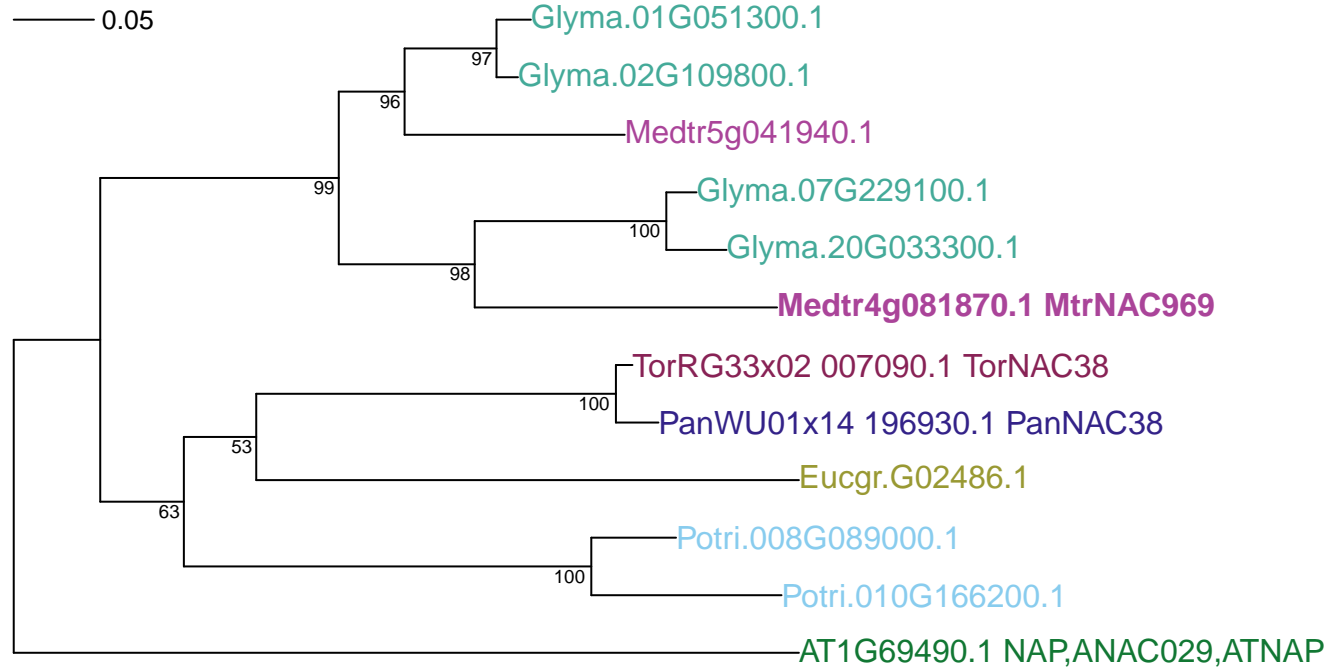

# OG0006786: Transcriptional regulators. MYB transcription factor

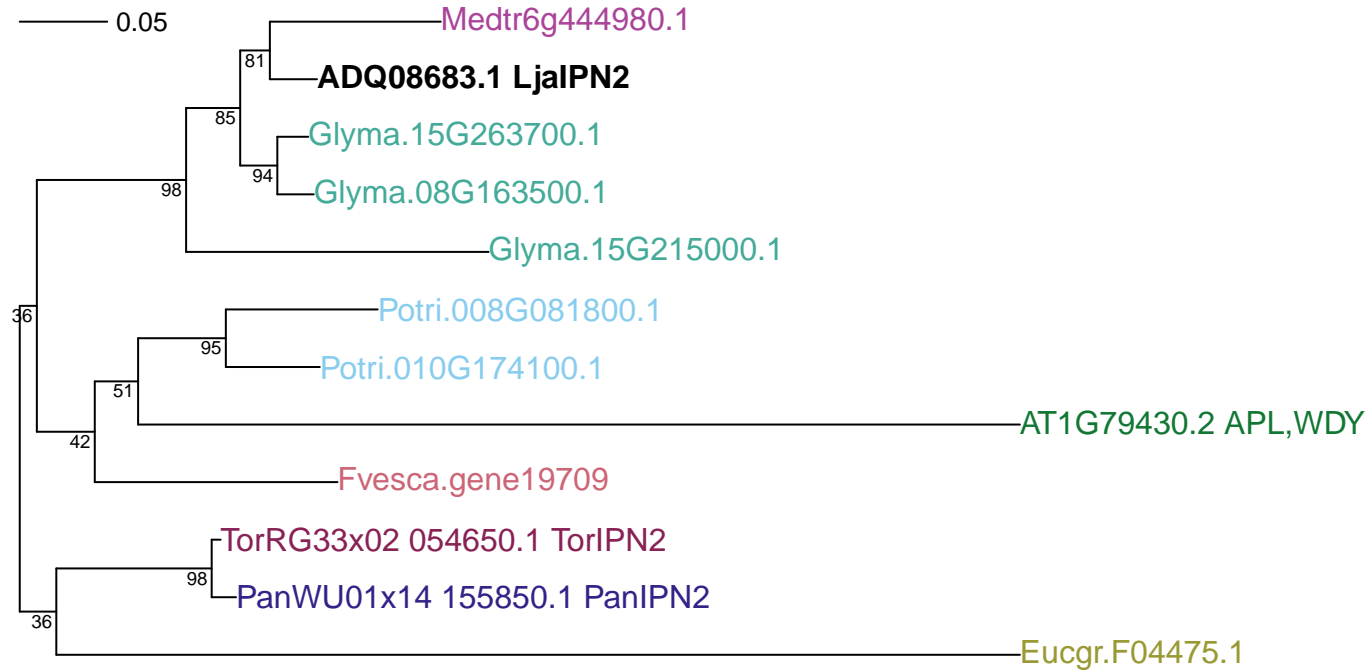

# OG0000726: Transcriptional regulators. MYB transcription factor

—0.05

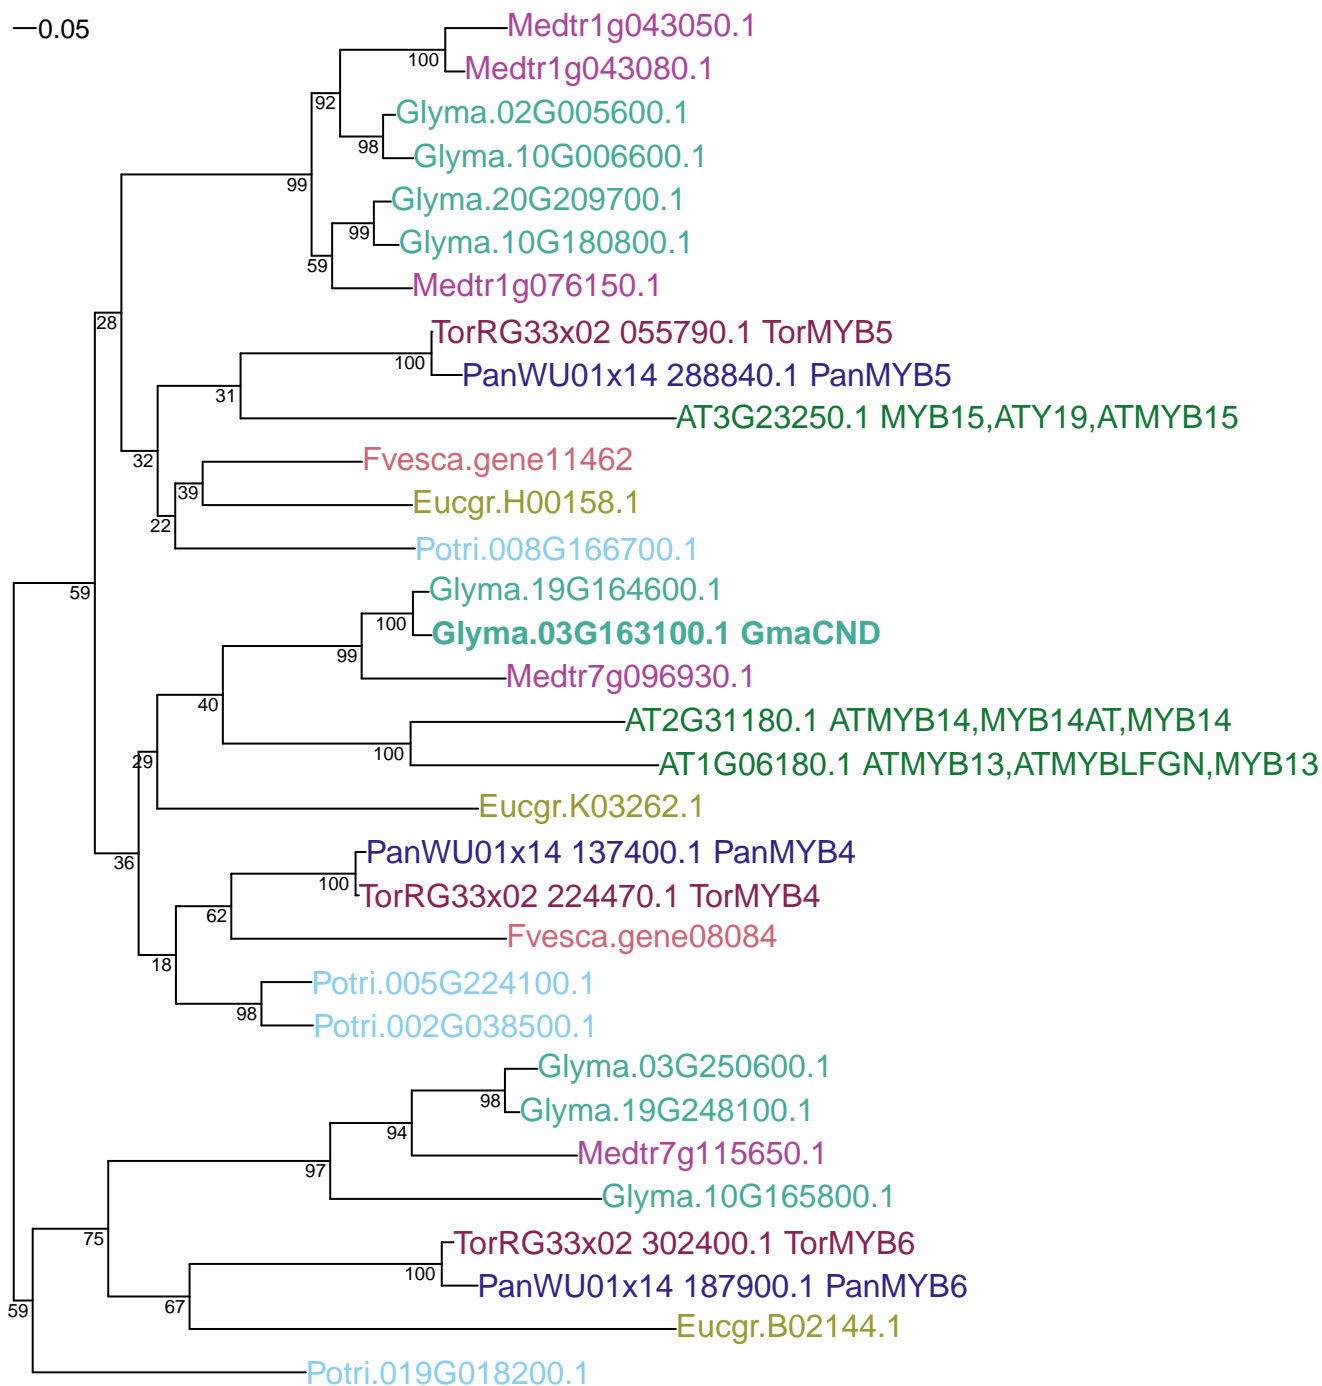



# OG0000972: Transcriptional regulators. MADS box transcription factor

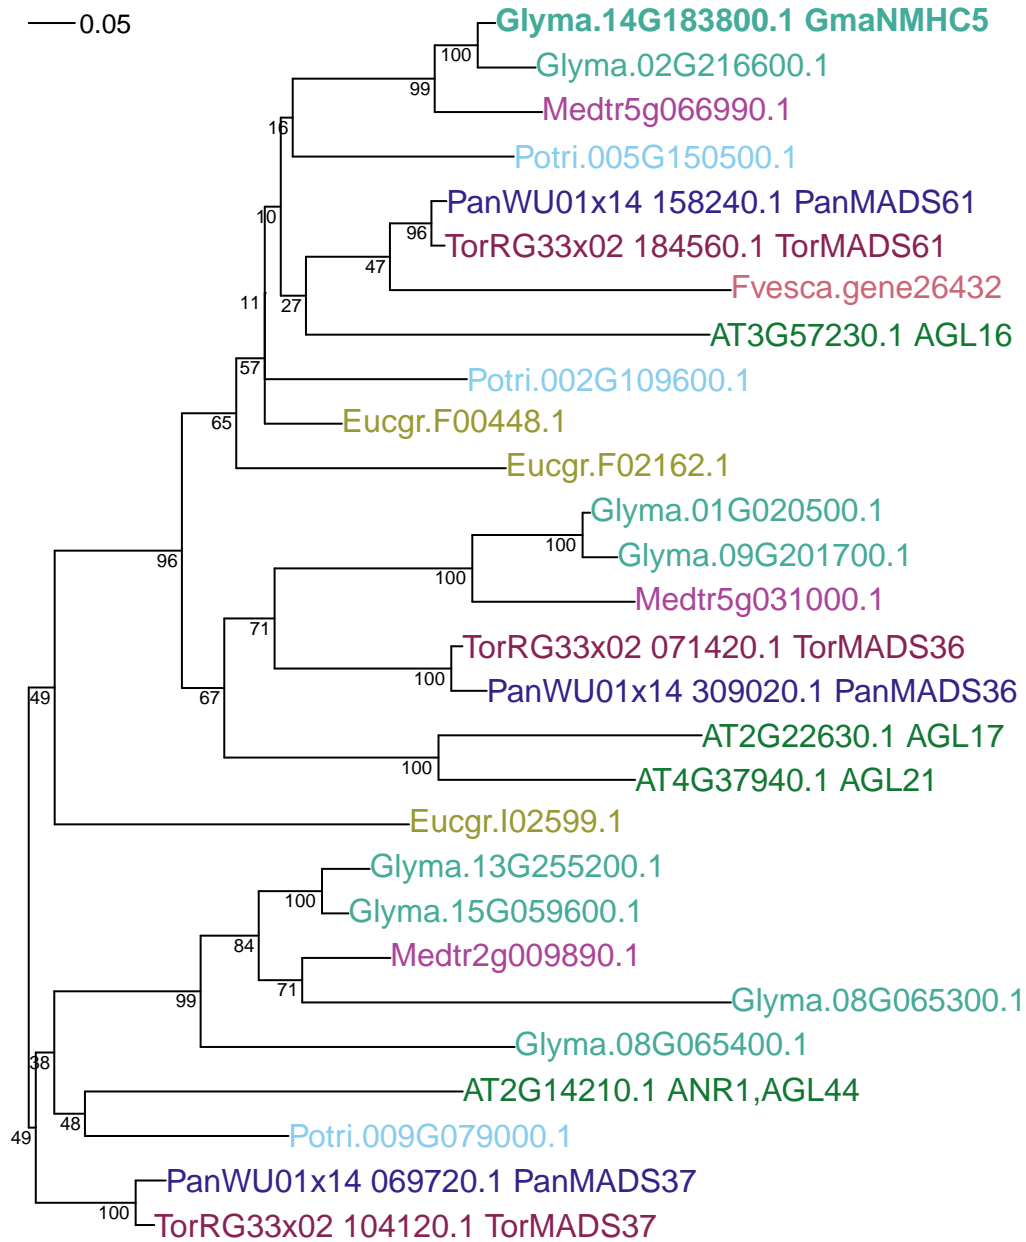

# OG0001293: Transcriptional regulators. KNOX homeodomain transcription factor

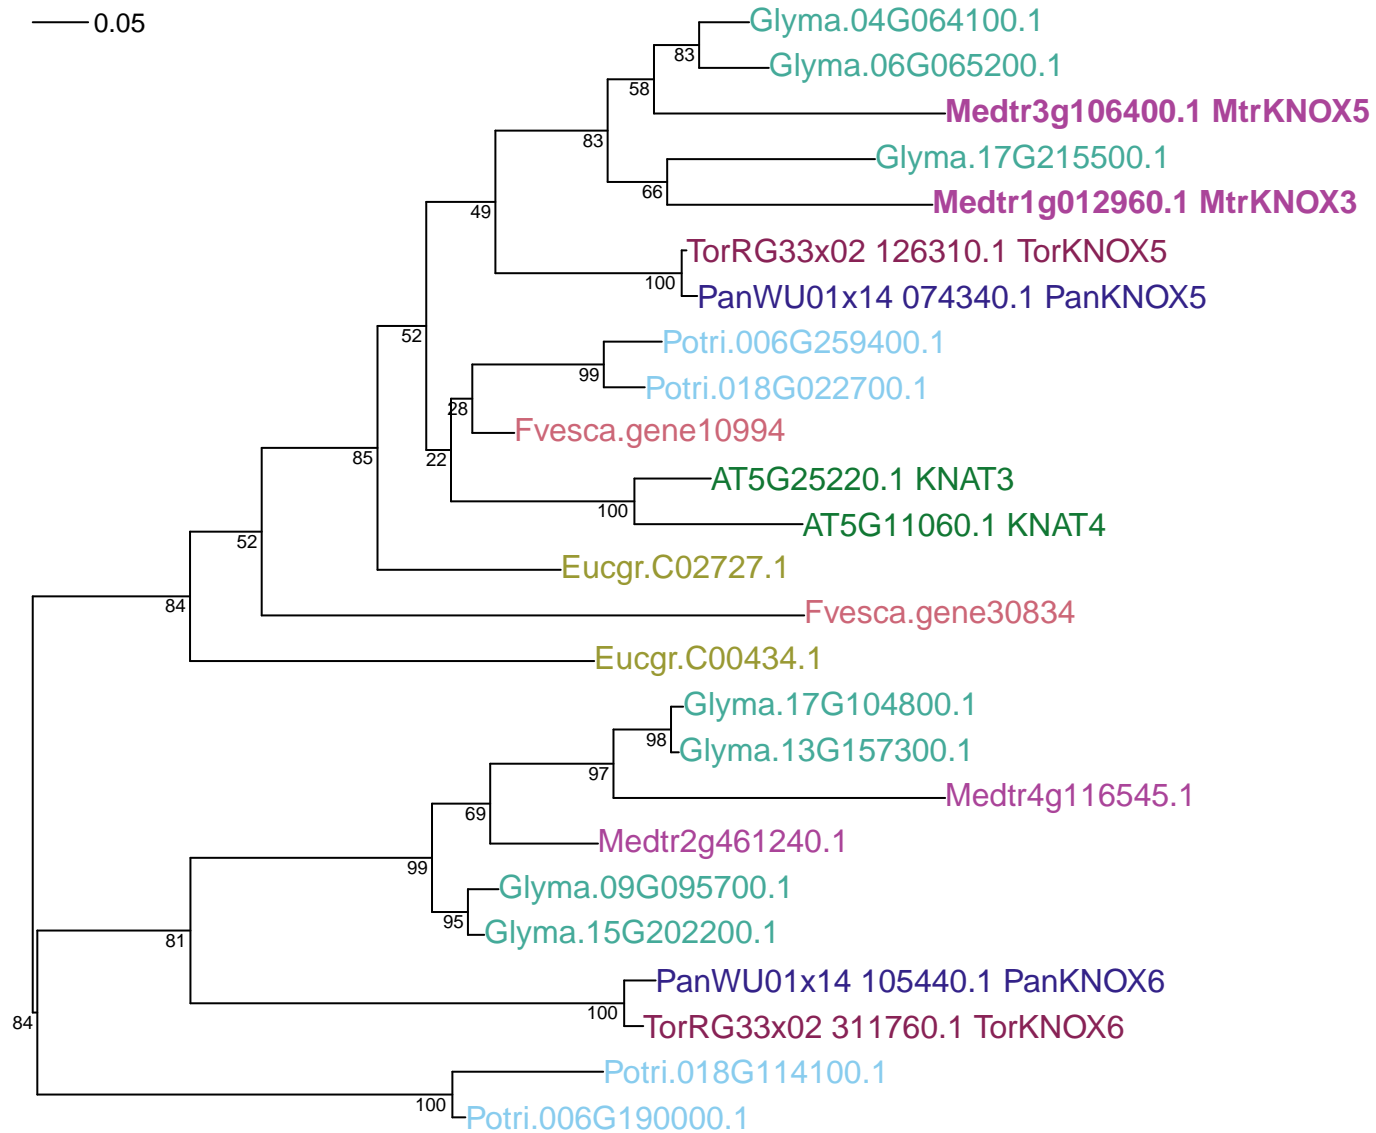

# OG0006742: Transcriptional regulators. KNOX homeodomain transcription factor

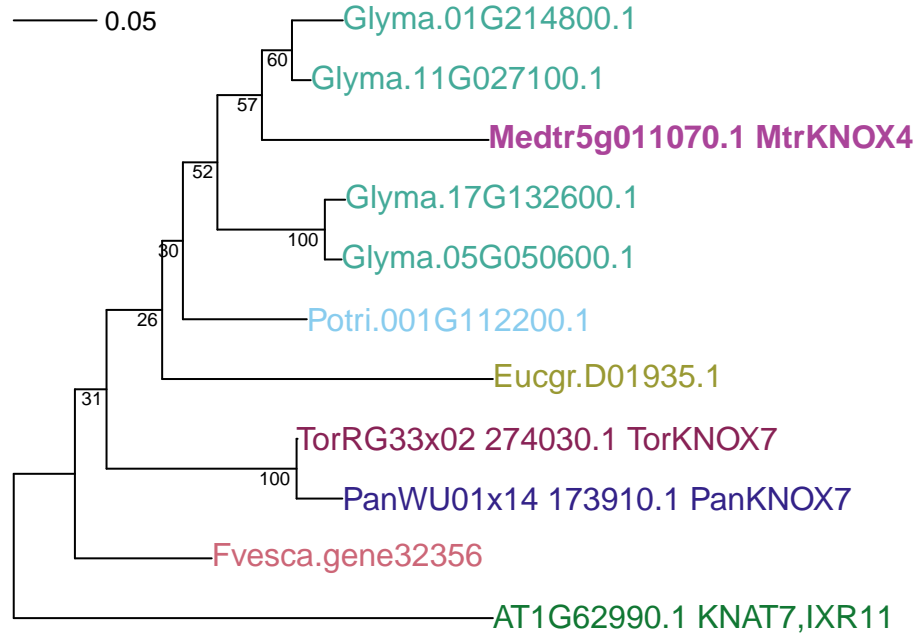

# OG0007076: Transcriptional regulators. WOX homeobox transcription factor

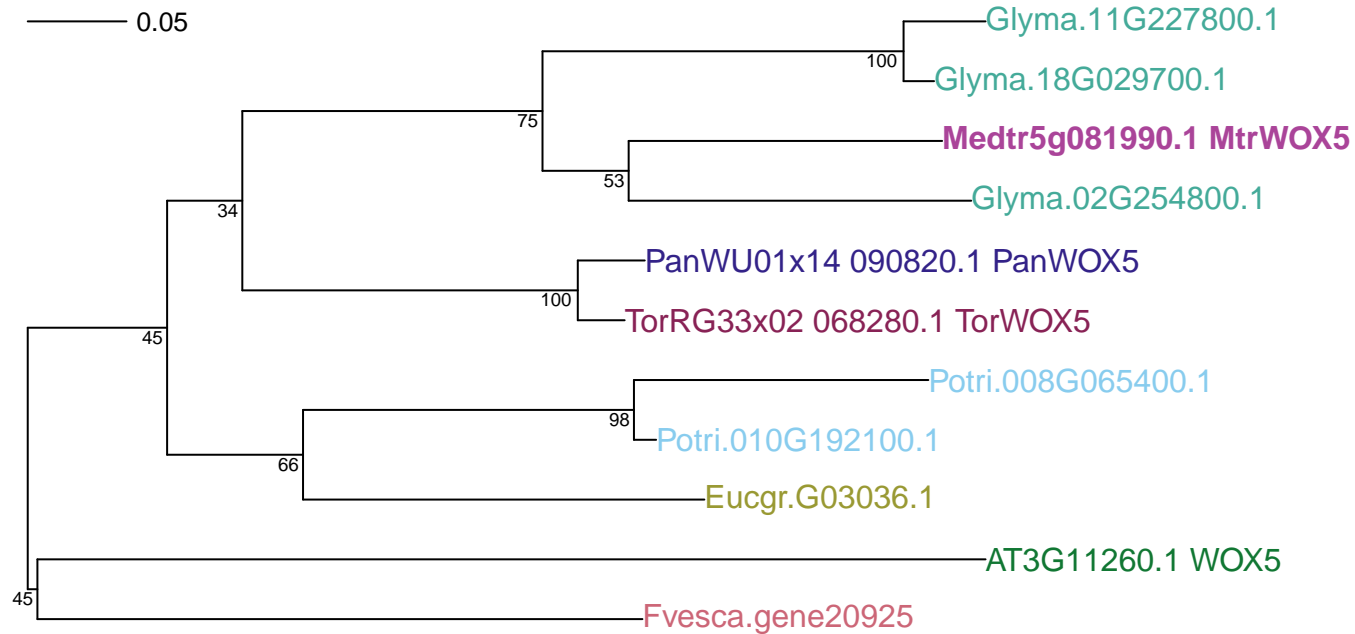

# OG0009597: Transcriptional regulators. bZIP transcription factor

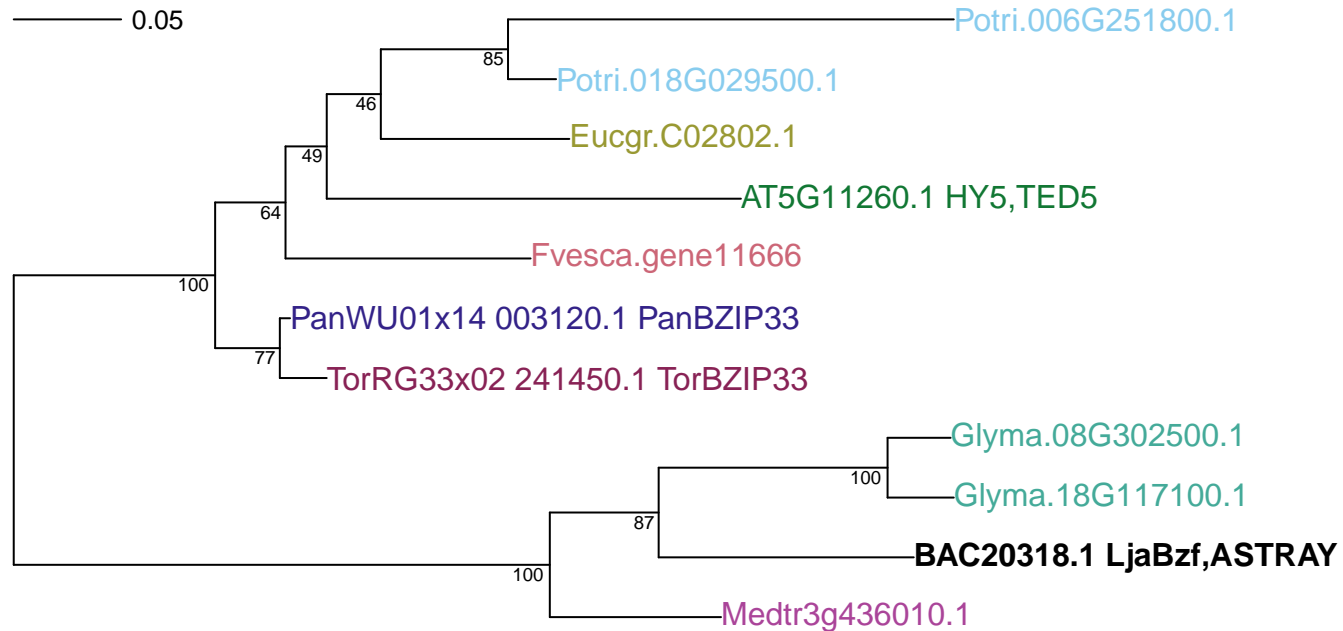

# OG0006889: Infection related. actin-related protein component

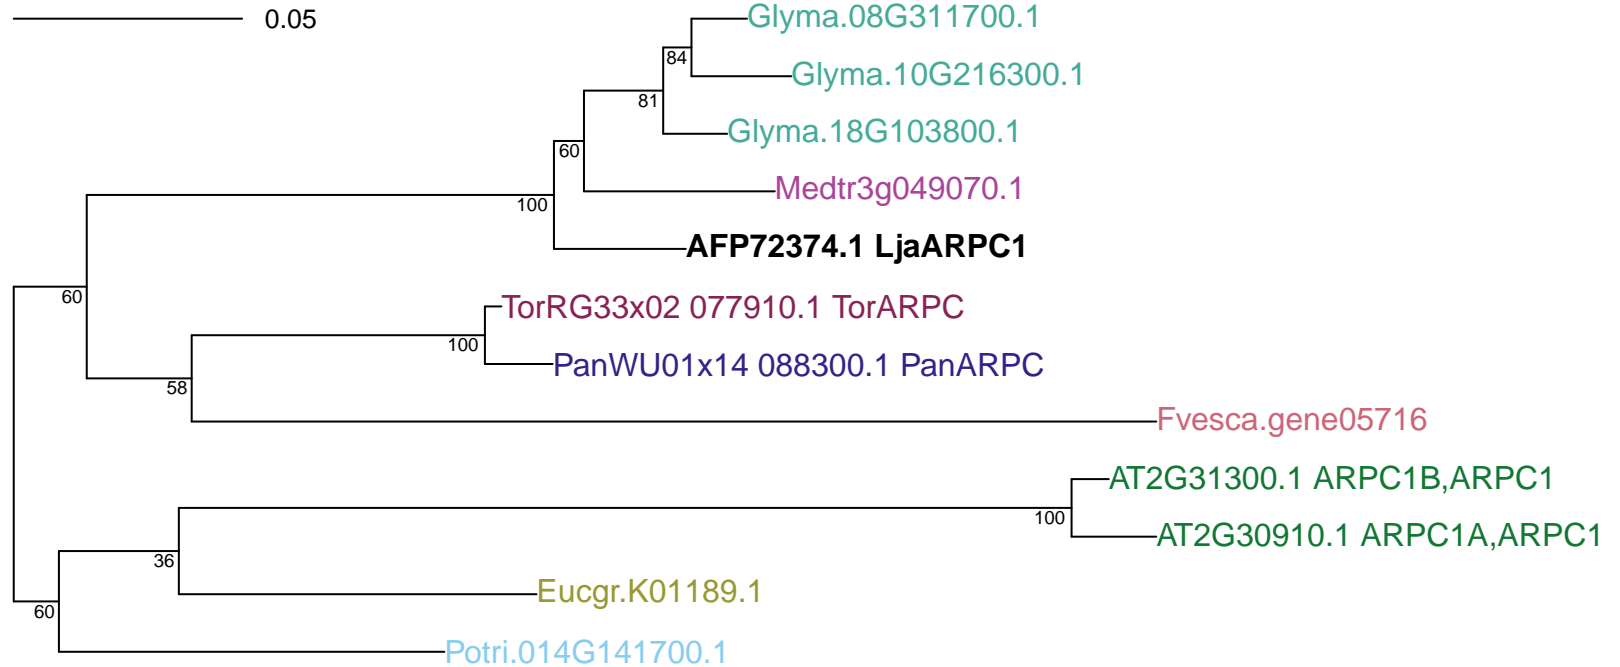

# OG0001569: Infection related. Annexin

— 0.05

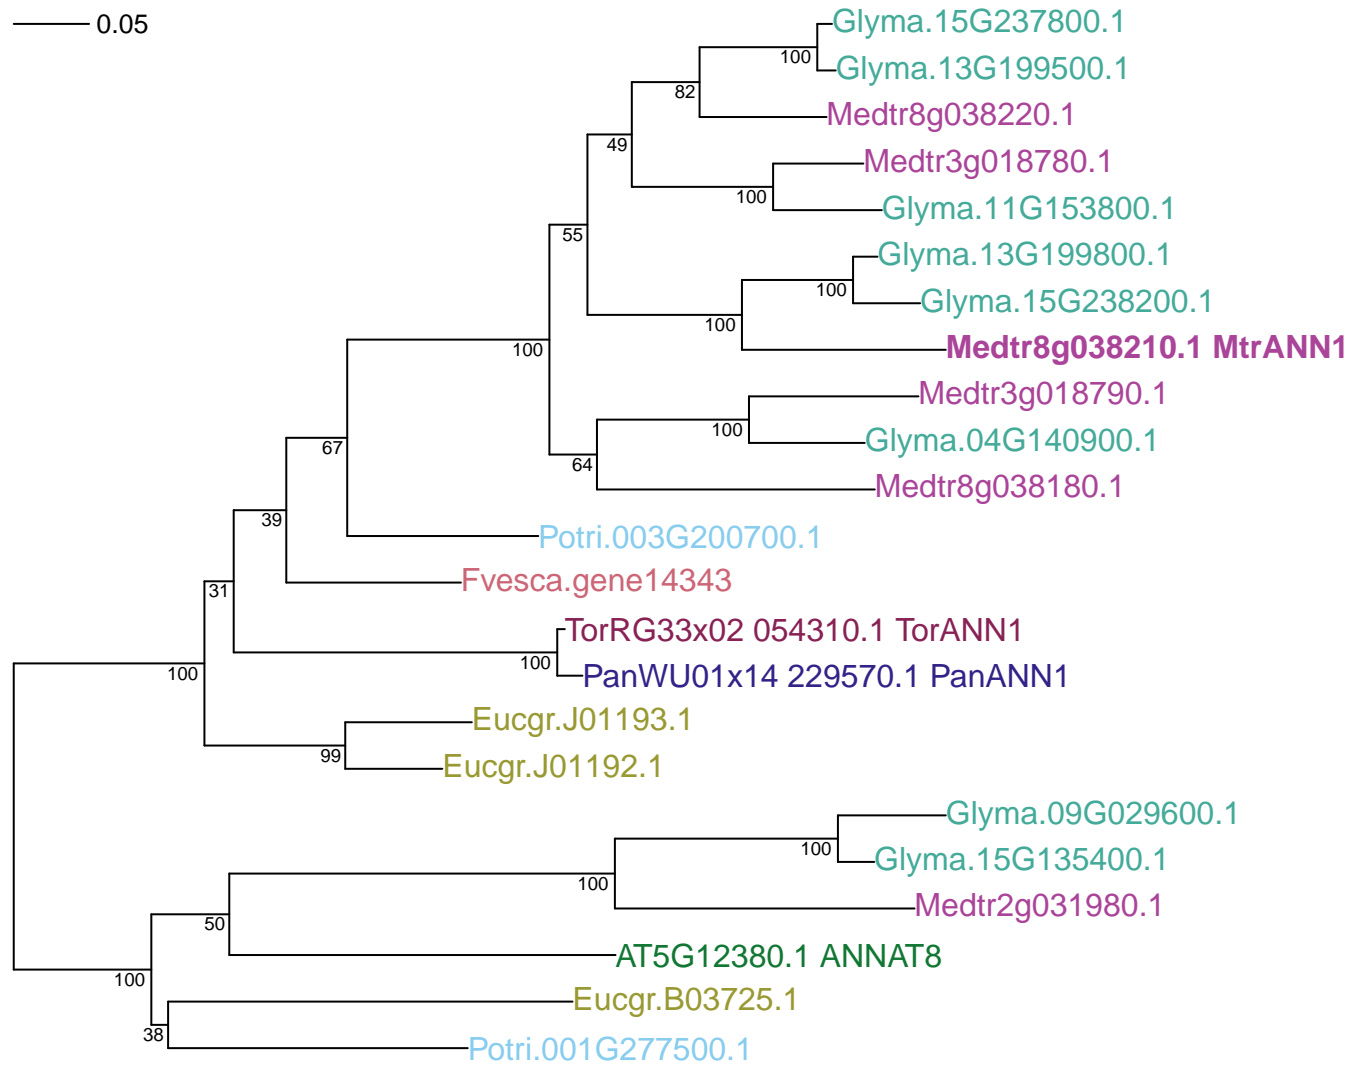

# OG0003786: Infection related. Cystathionine-beta-Synthase

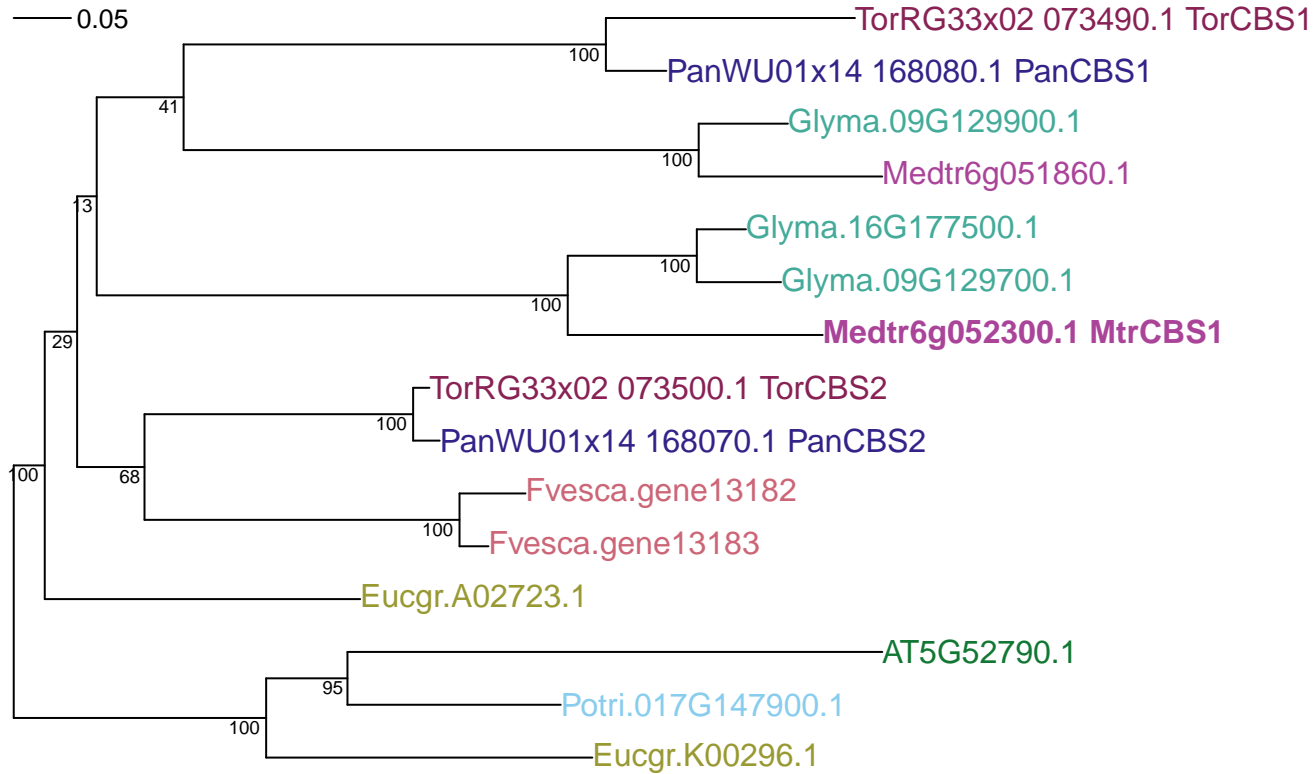



# OG0000343: Infection related. Devil-type peptide

-0.05

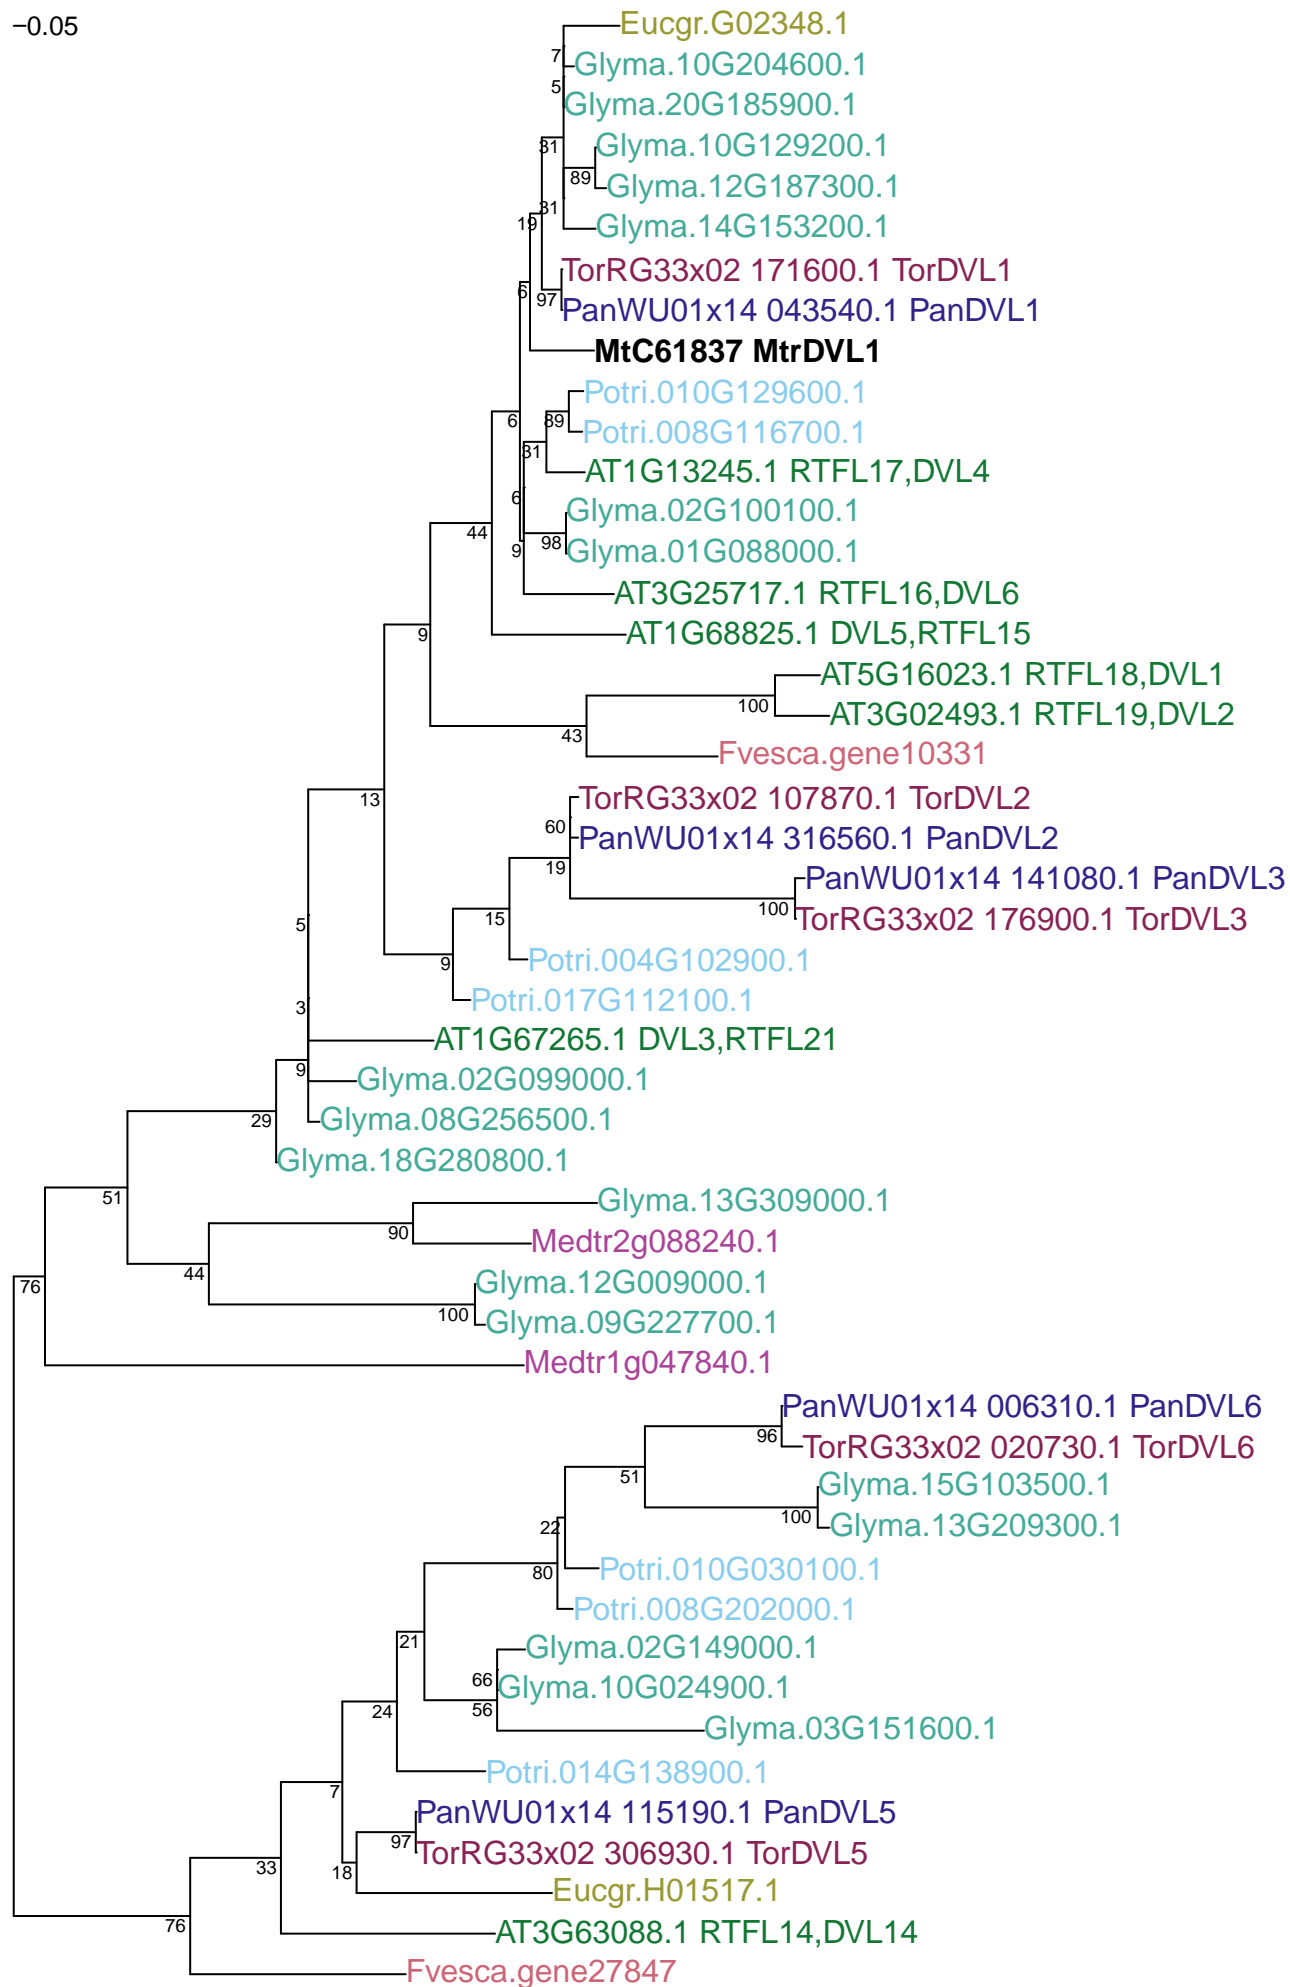

# OG0005590: Infection related. deubiquitinating enzyme

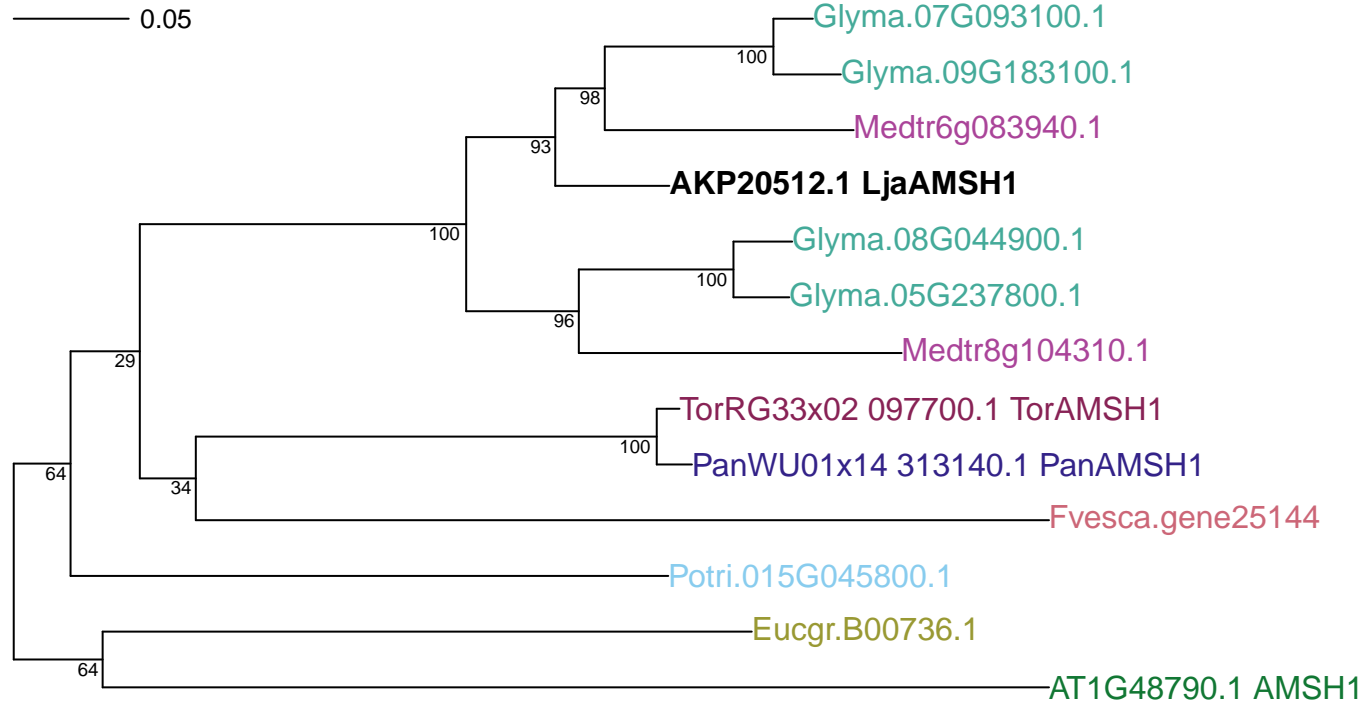

# OG0011786: Infection related. DNA topoisomerase VI subunit A

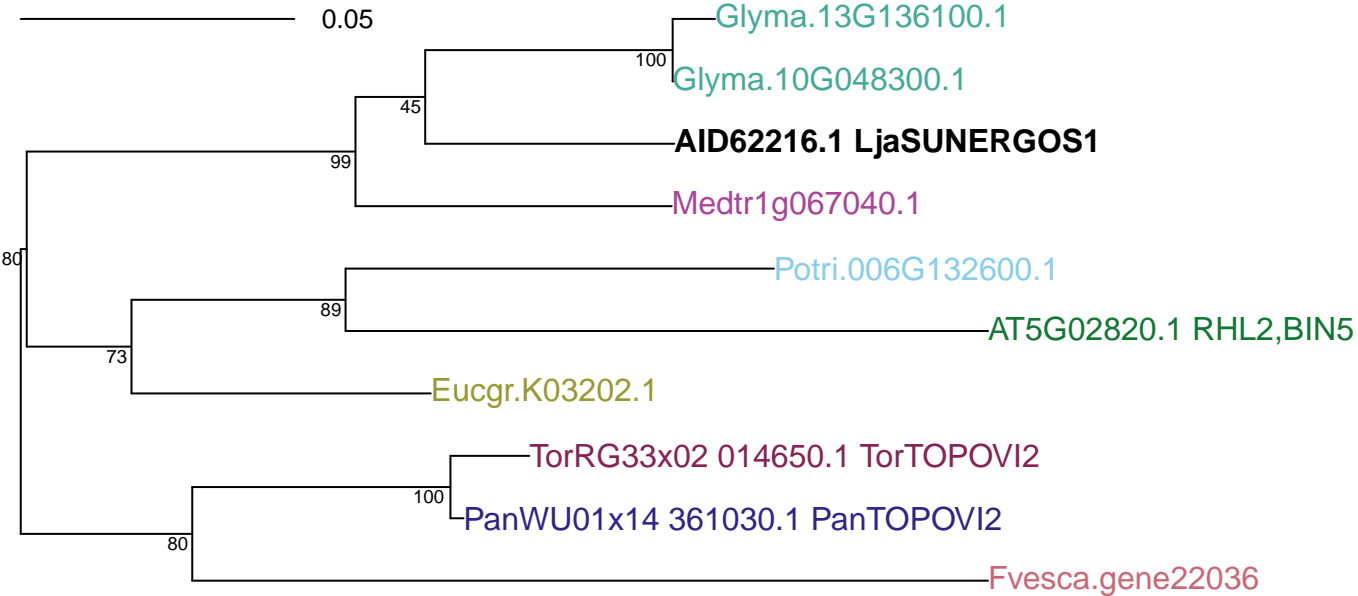

# OG0008368: Infection related. DNA topoisomerase VI RHL1

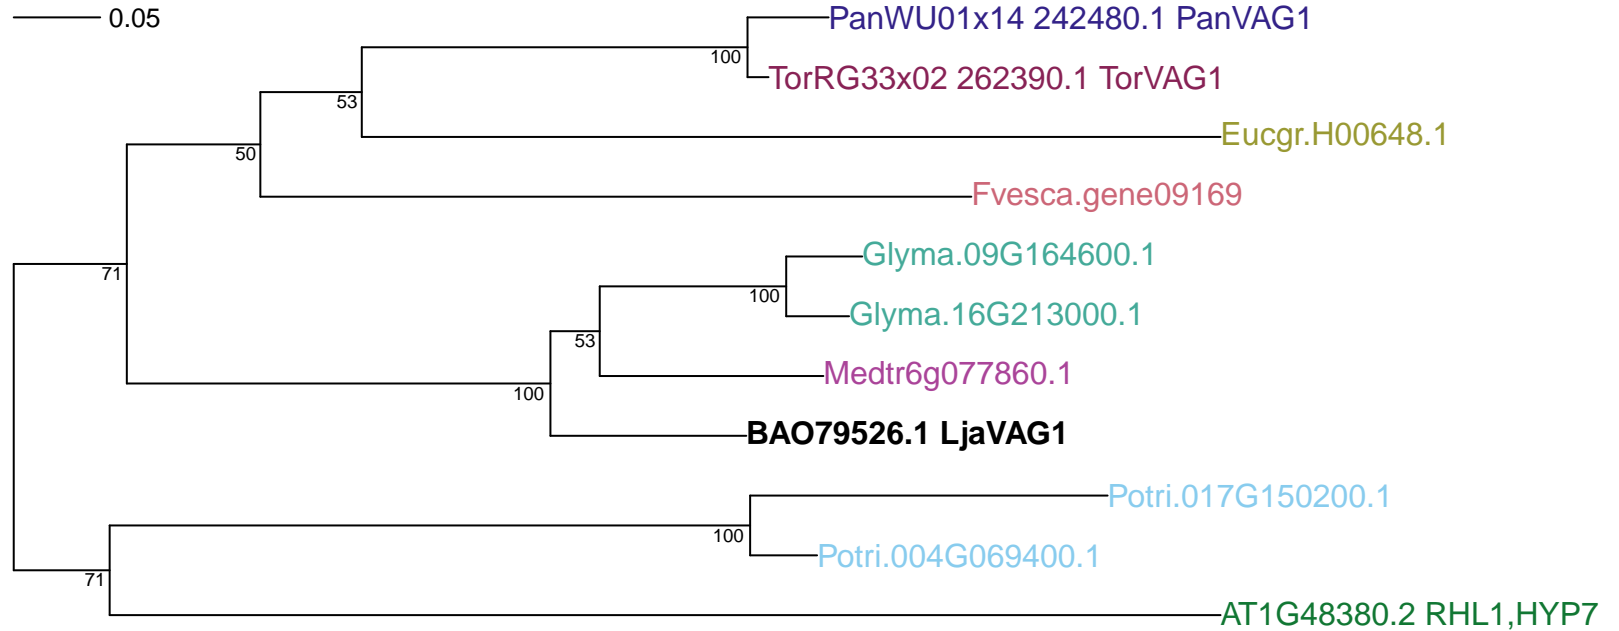

# OG0009774: Infection related. E3 ubiquitin ligase

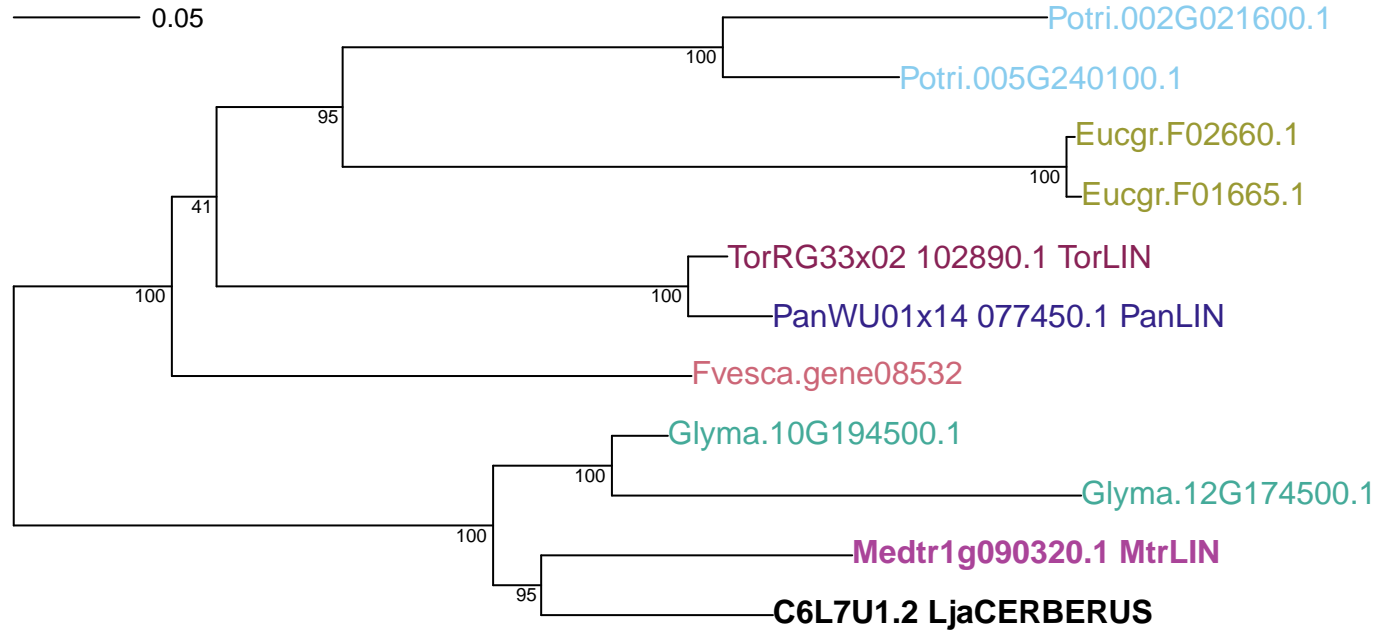

## OG0014072: Infection related. Long coiled-coil proetin

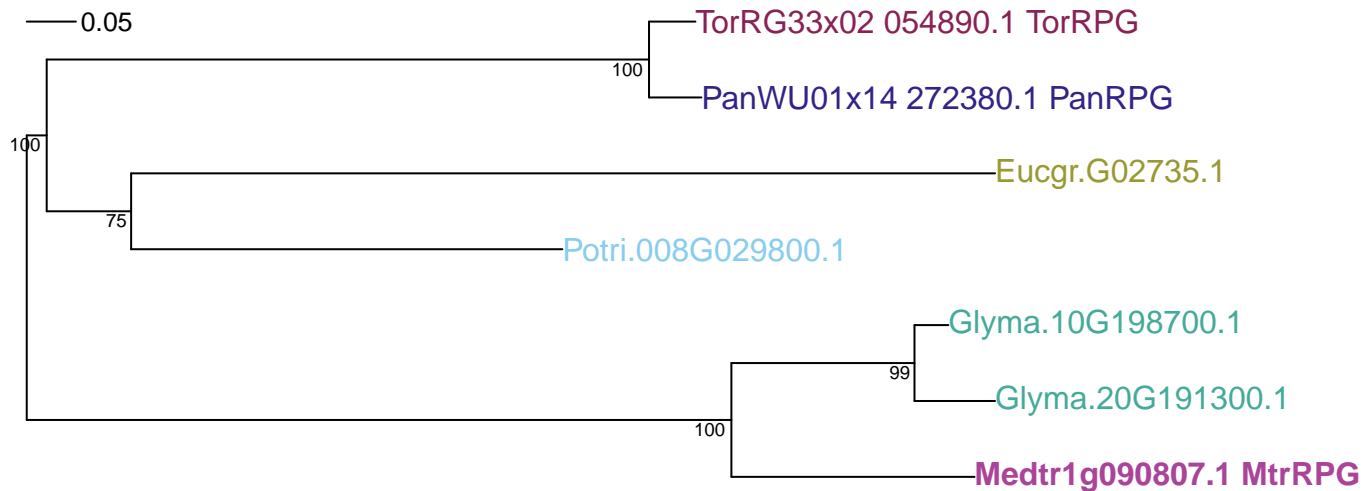

## OG0012612: Infection related. SCAR/WAVE protein

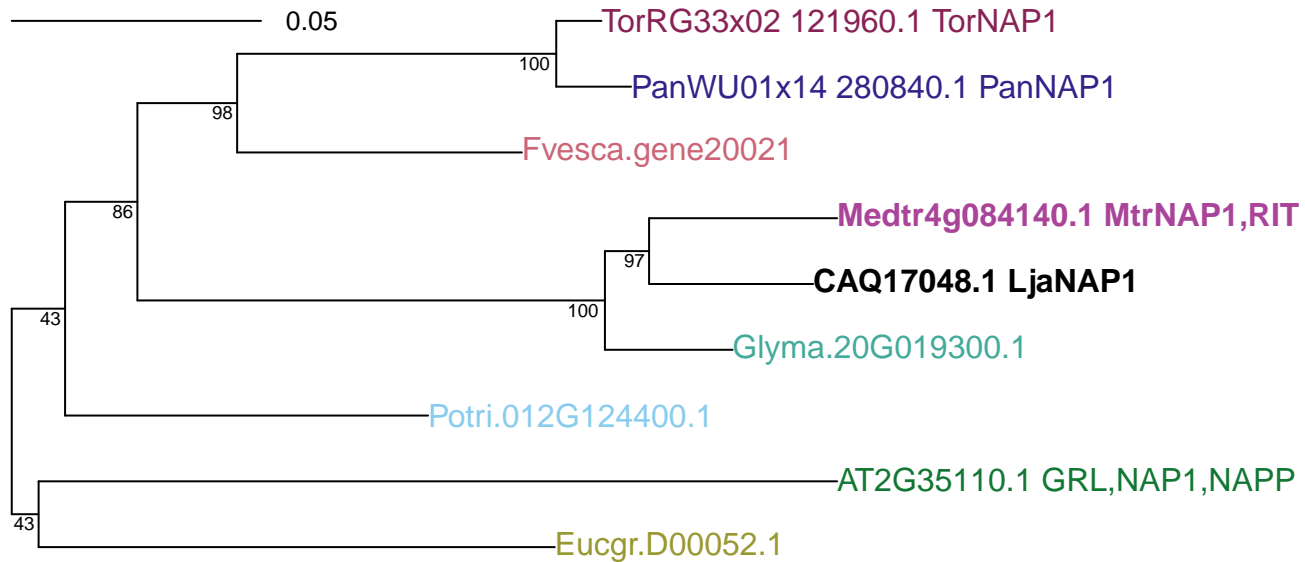

# OG0011867: Infection related. p53 inducible RNA

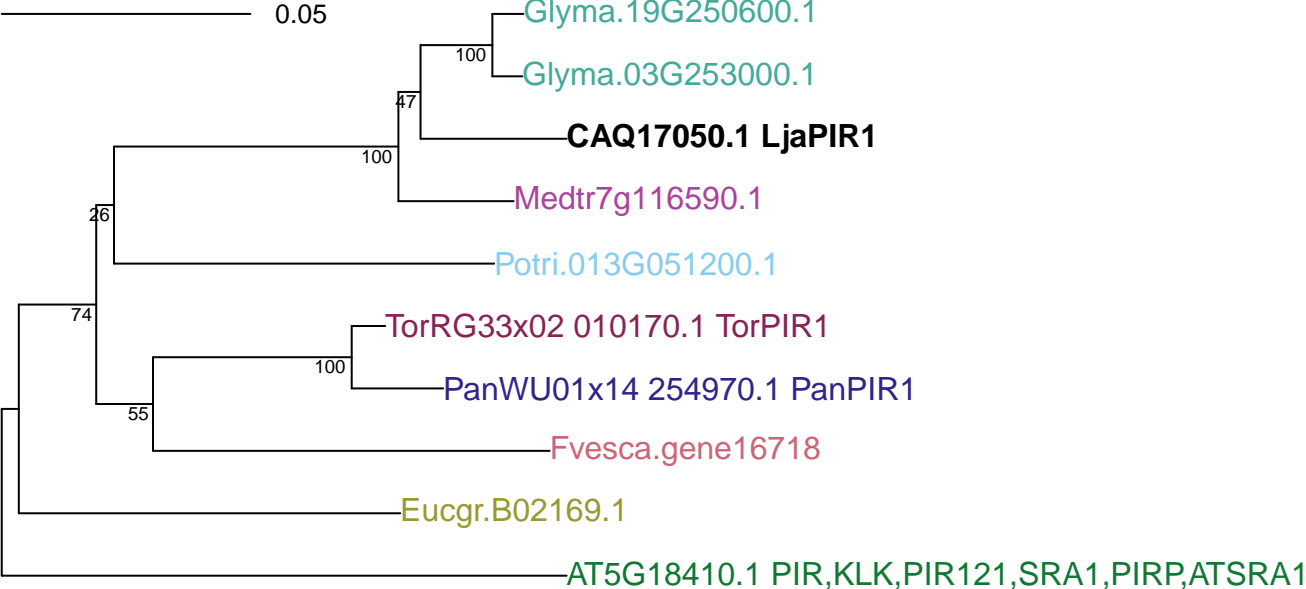



# OG0000686: Infection related. pectate lyase

0.05

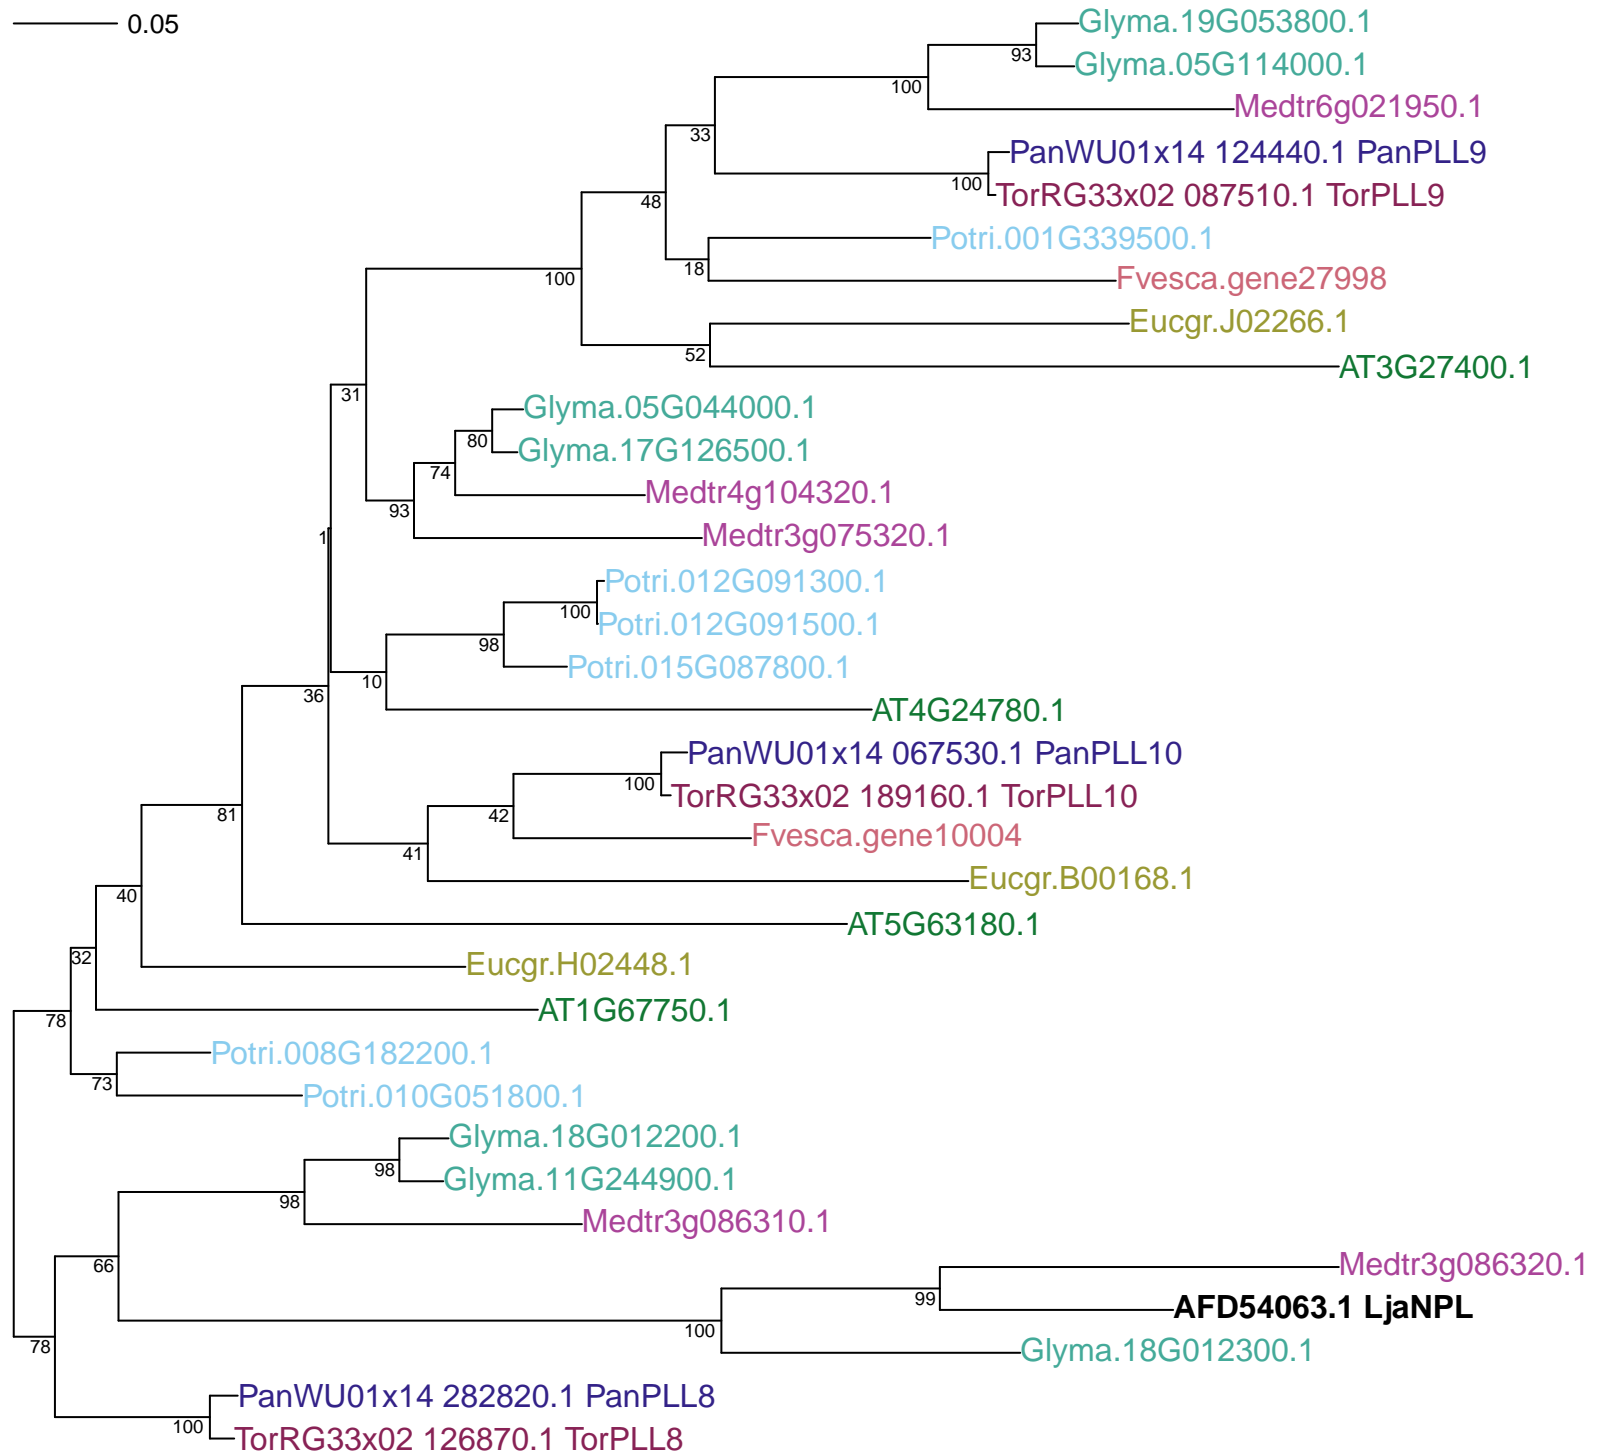

OG0000054: Infection related. peroxidase

—0.05

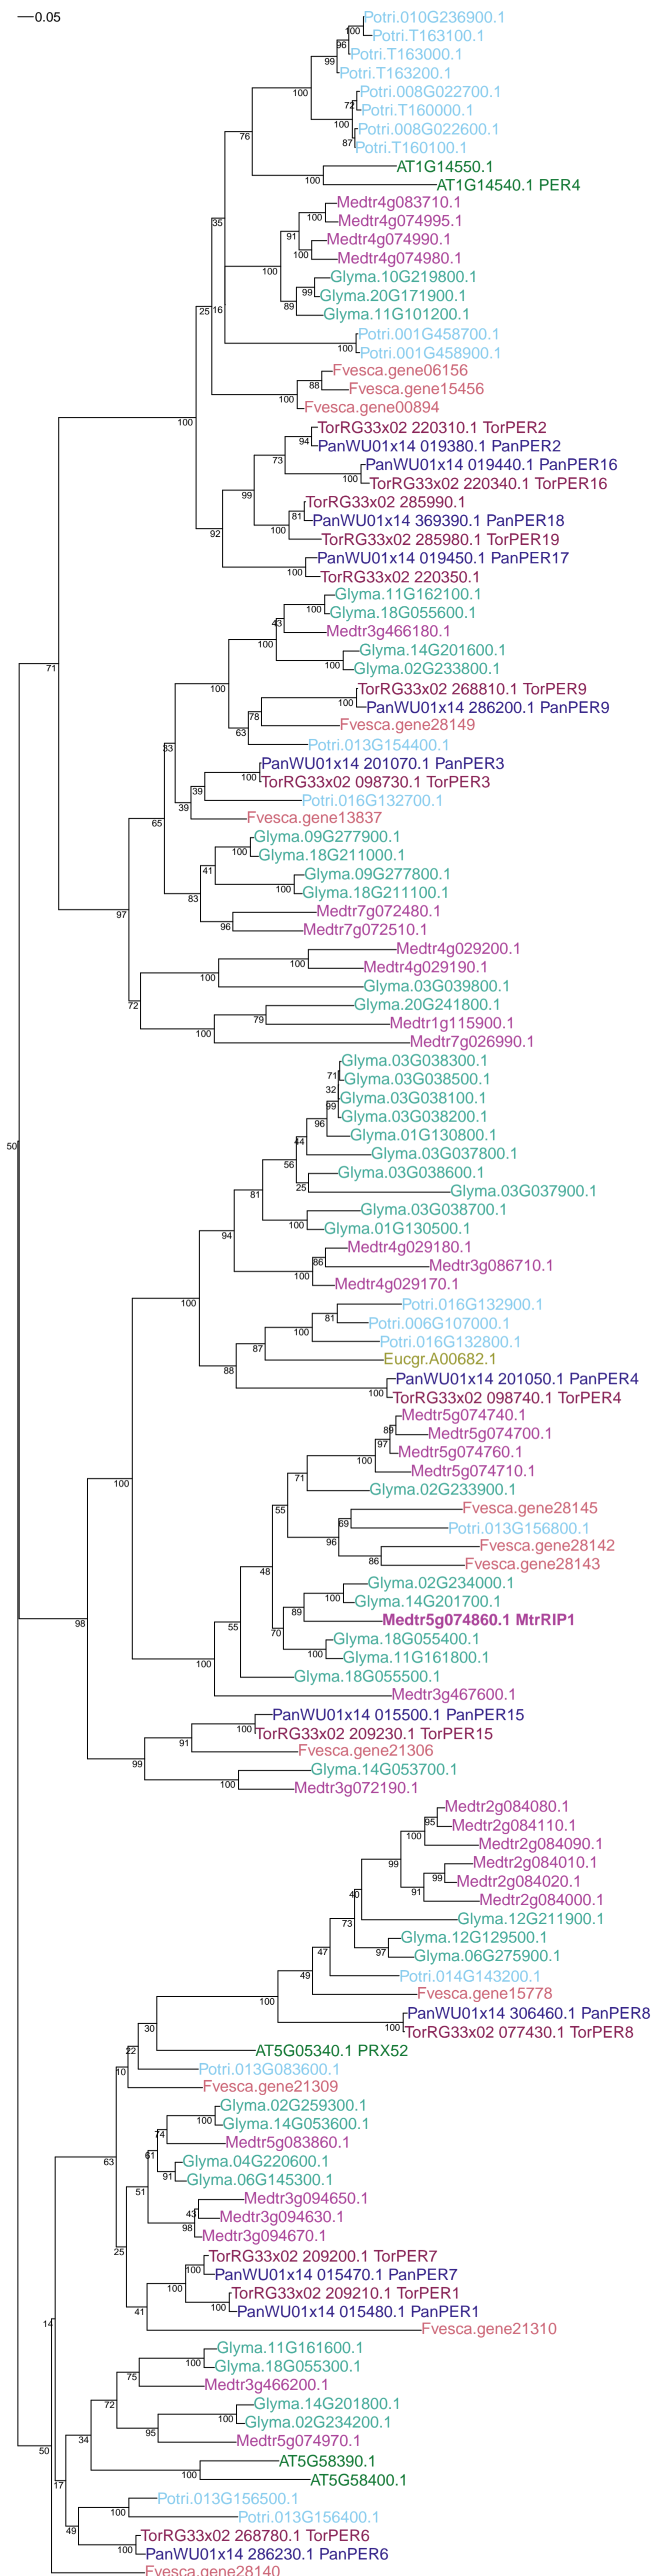

# OG0004210: Infection related. Rapid alkalization factor (RALF) peptide

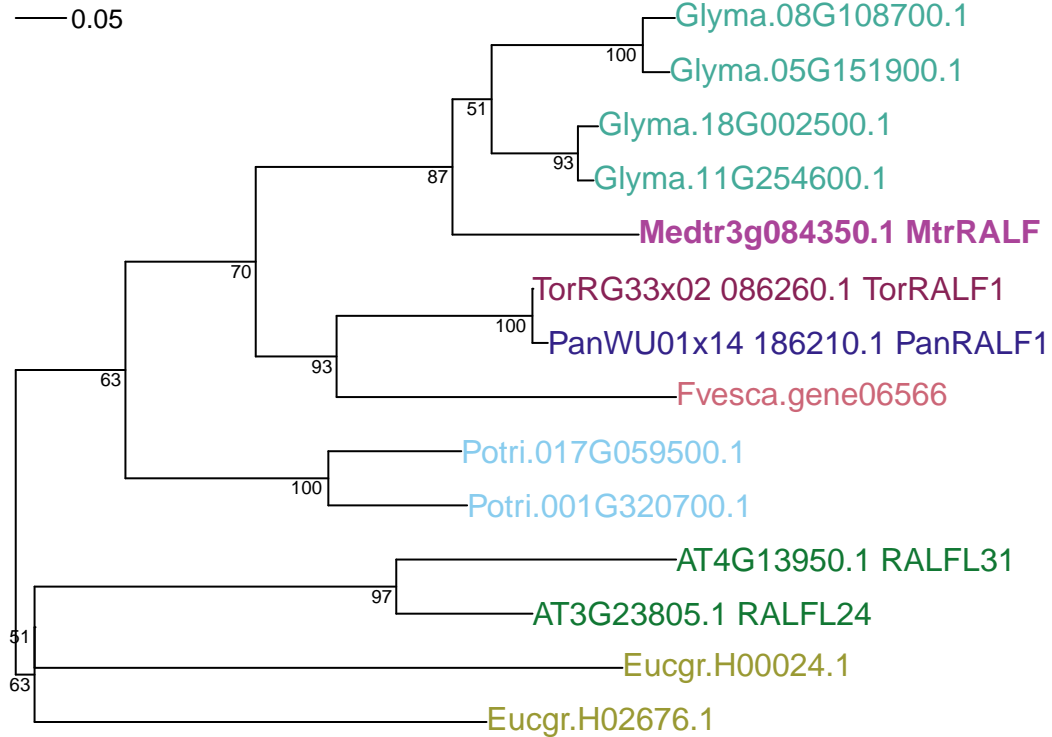

# OG0013991: Infection related. Vapyrin

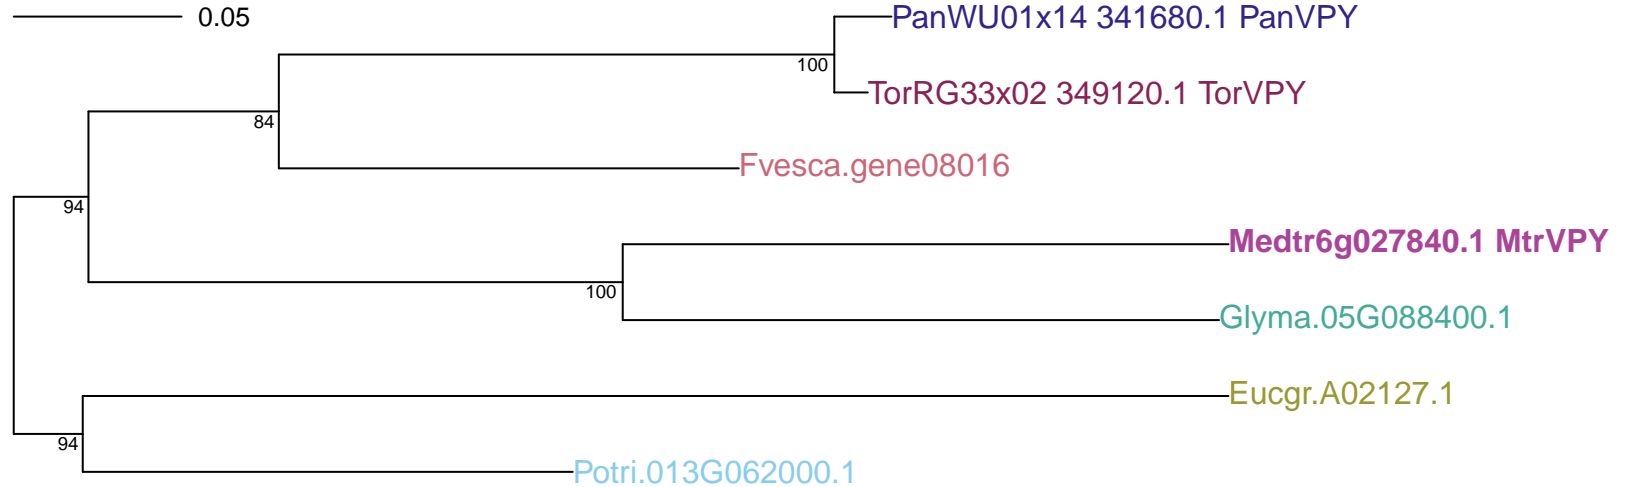

# OG0002788: Nodule & symbiosome development. Symbiosome localized esterase

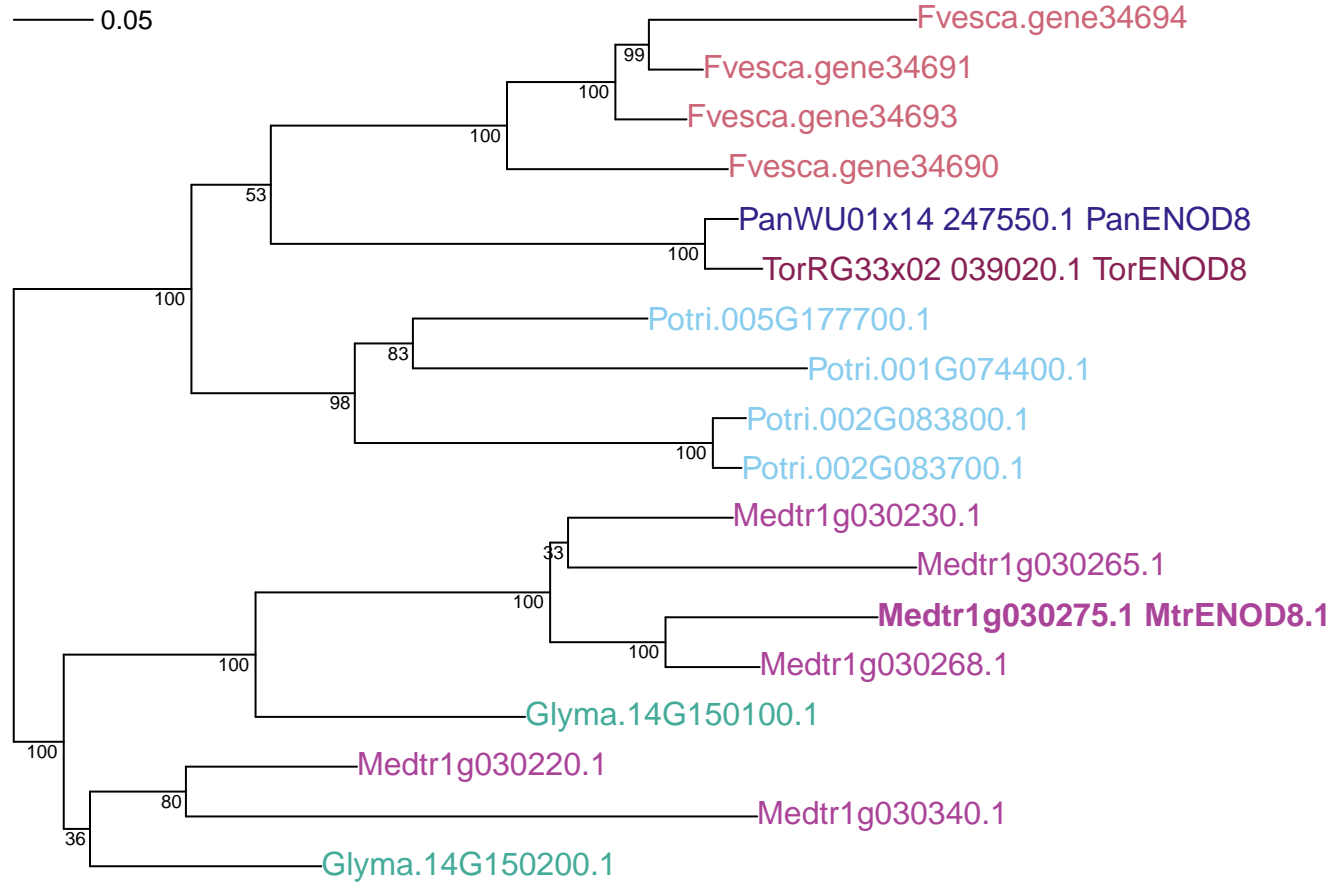

# OG0001416: Nodule & symbiosome development. early nodulin

—0.05

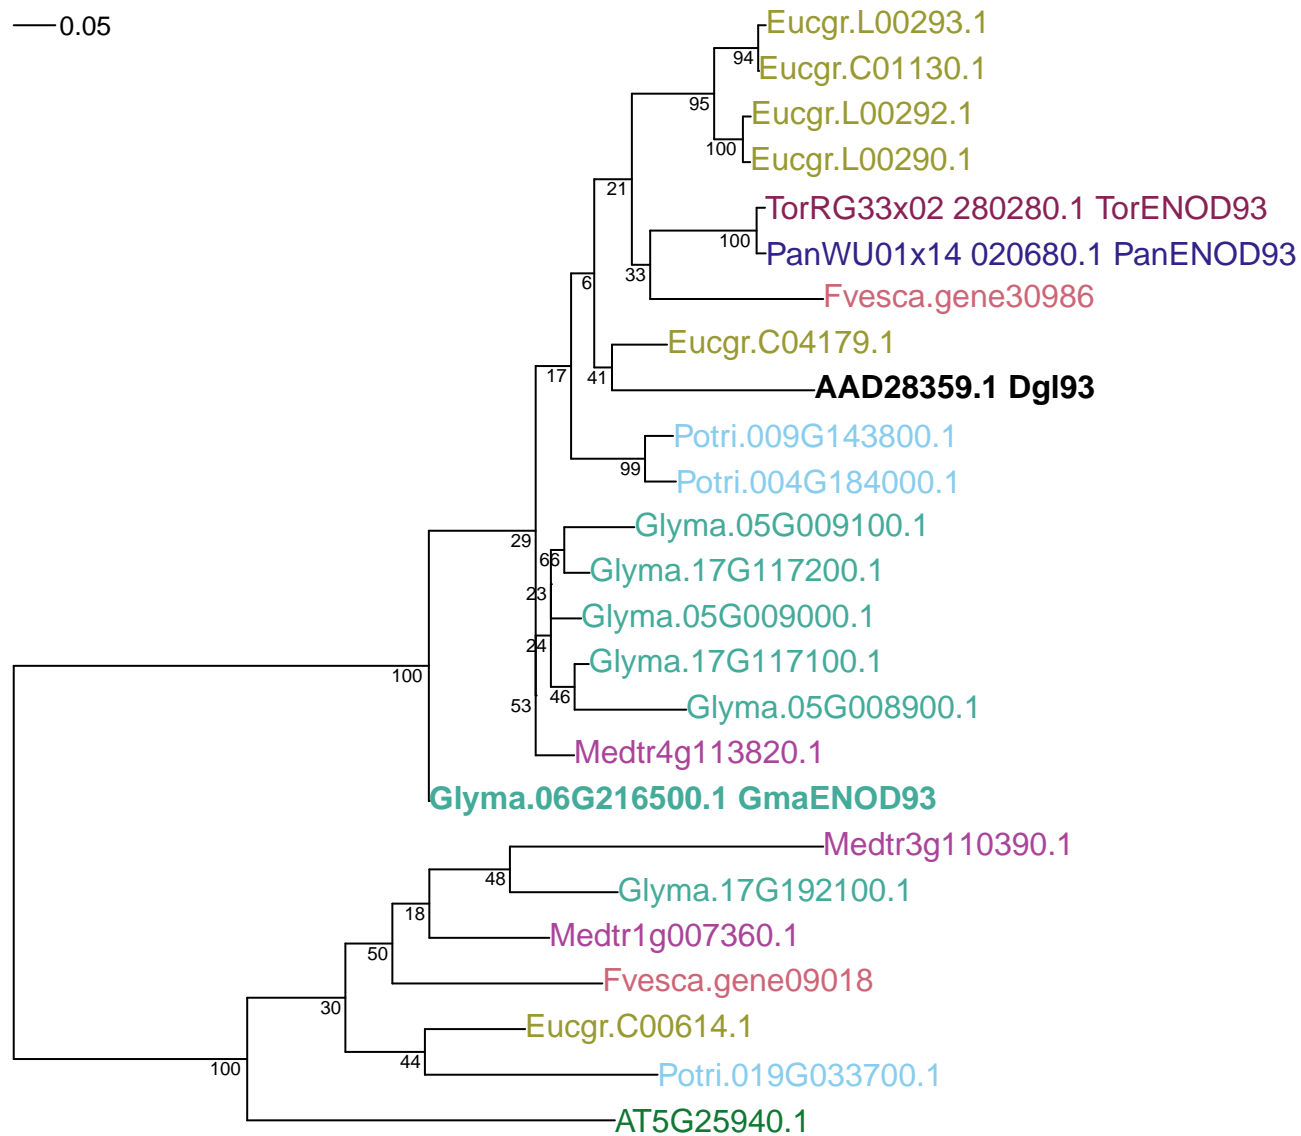

# OG0002946: Nodule & symbiosome development. Ankyrin-repeat membrane protein

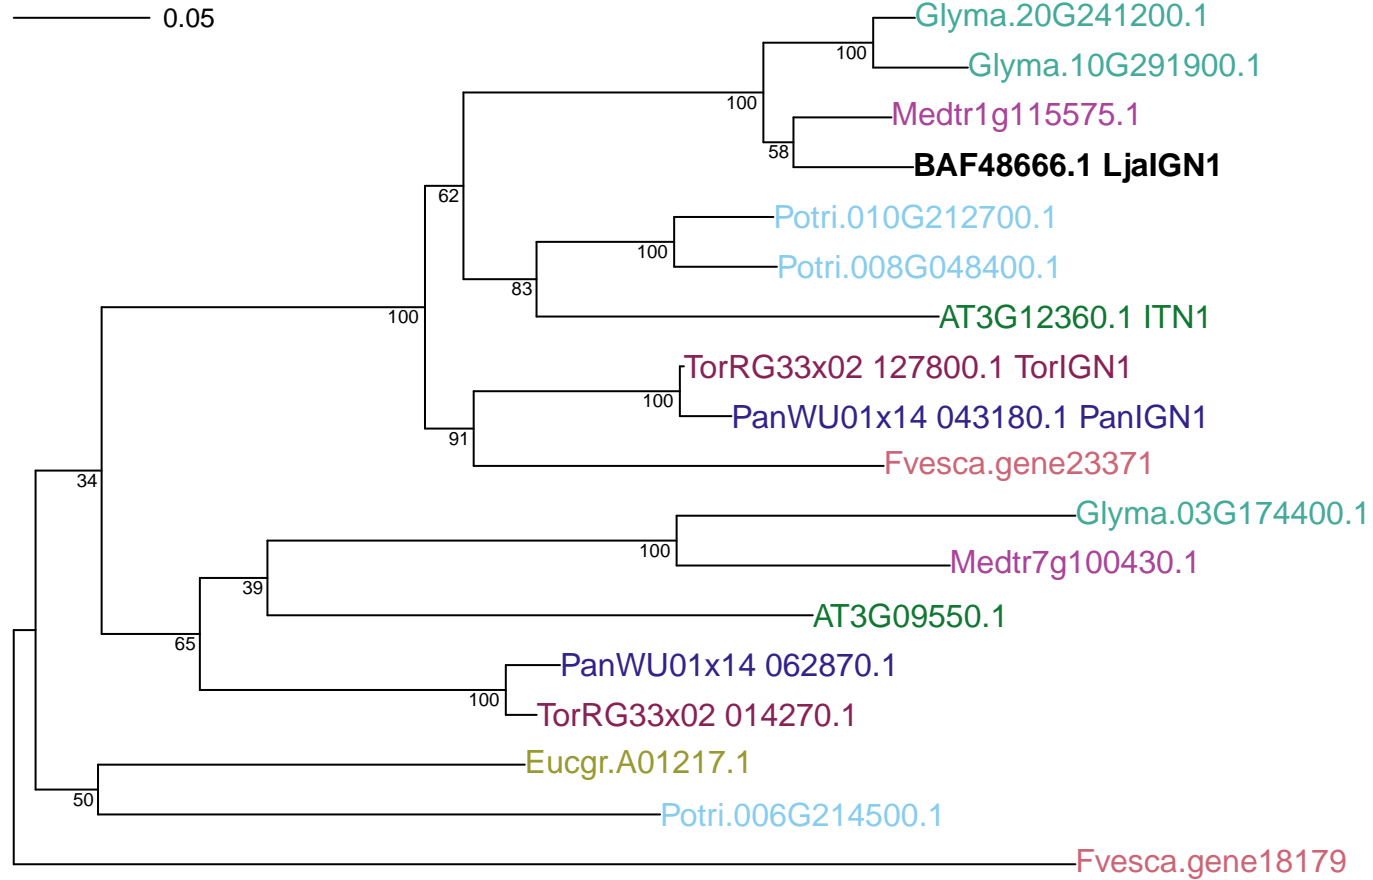

# OG0015109–0018304: Nodule & symbiosome development. methionine–rich membrane protein

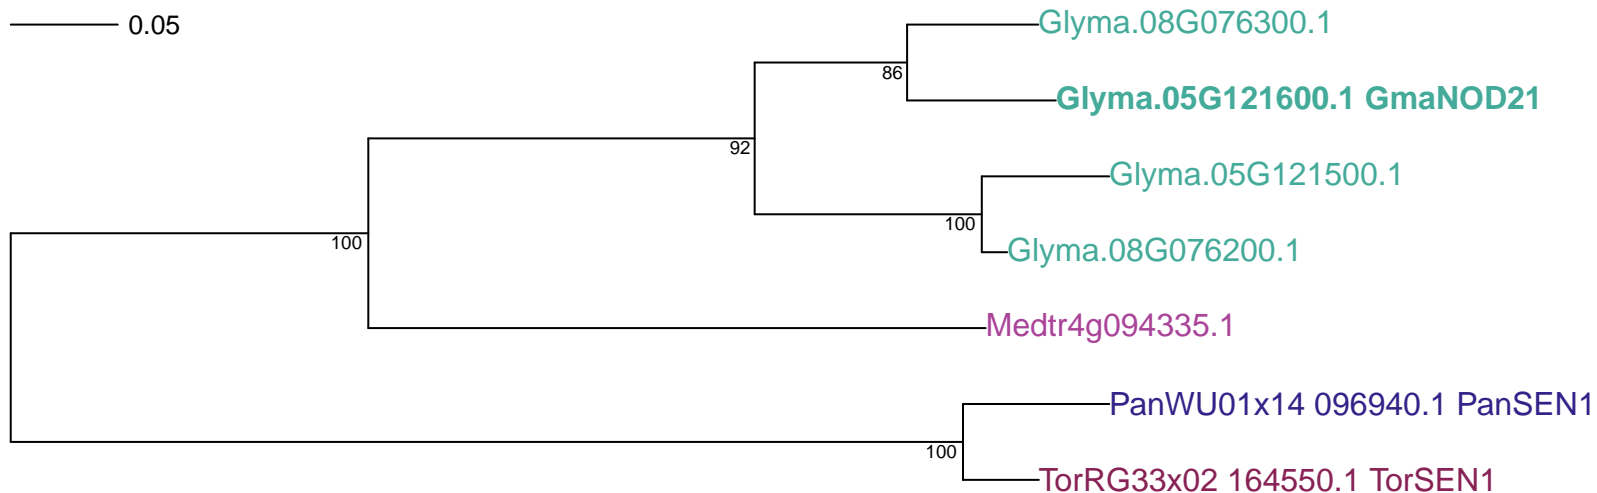



# OG0015095: Nodule & symbiosome development. small membrane localised protein

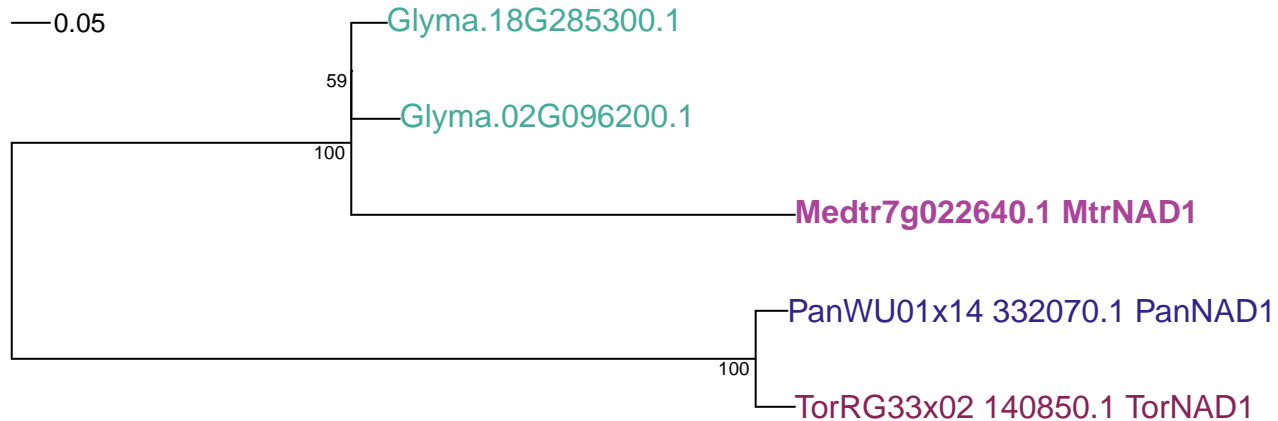

# OG0000842: Nodule & symbiosome development. Stress up-regulated Nod 19

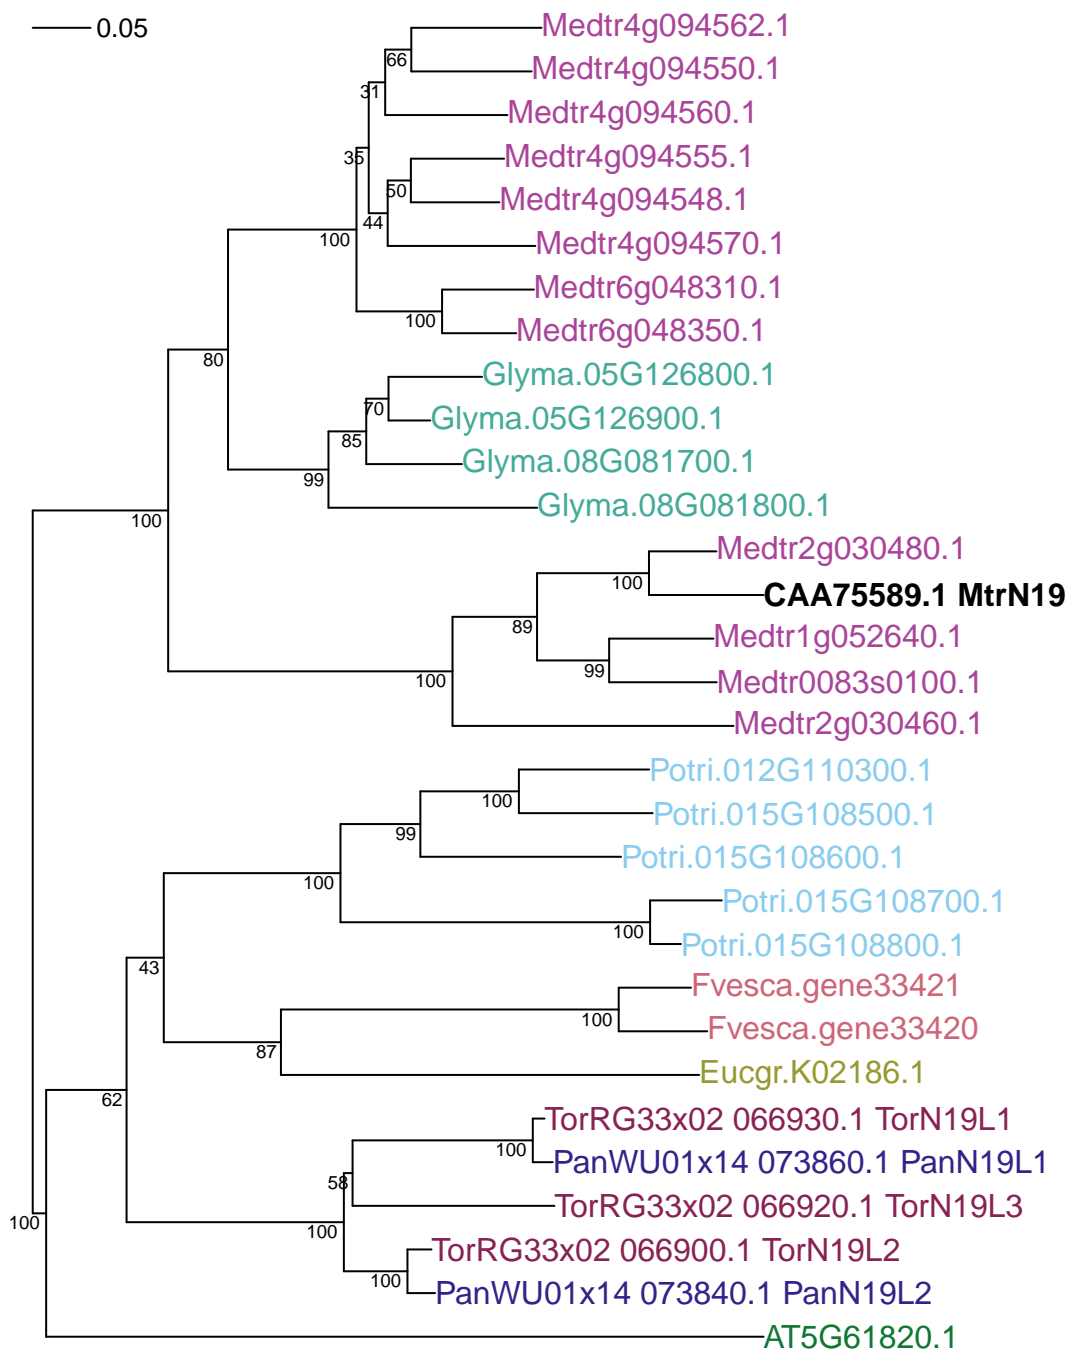

# OG0006355: Nodule & symbiosome development. Remorin

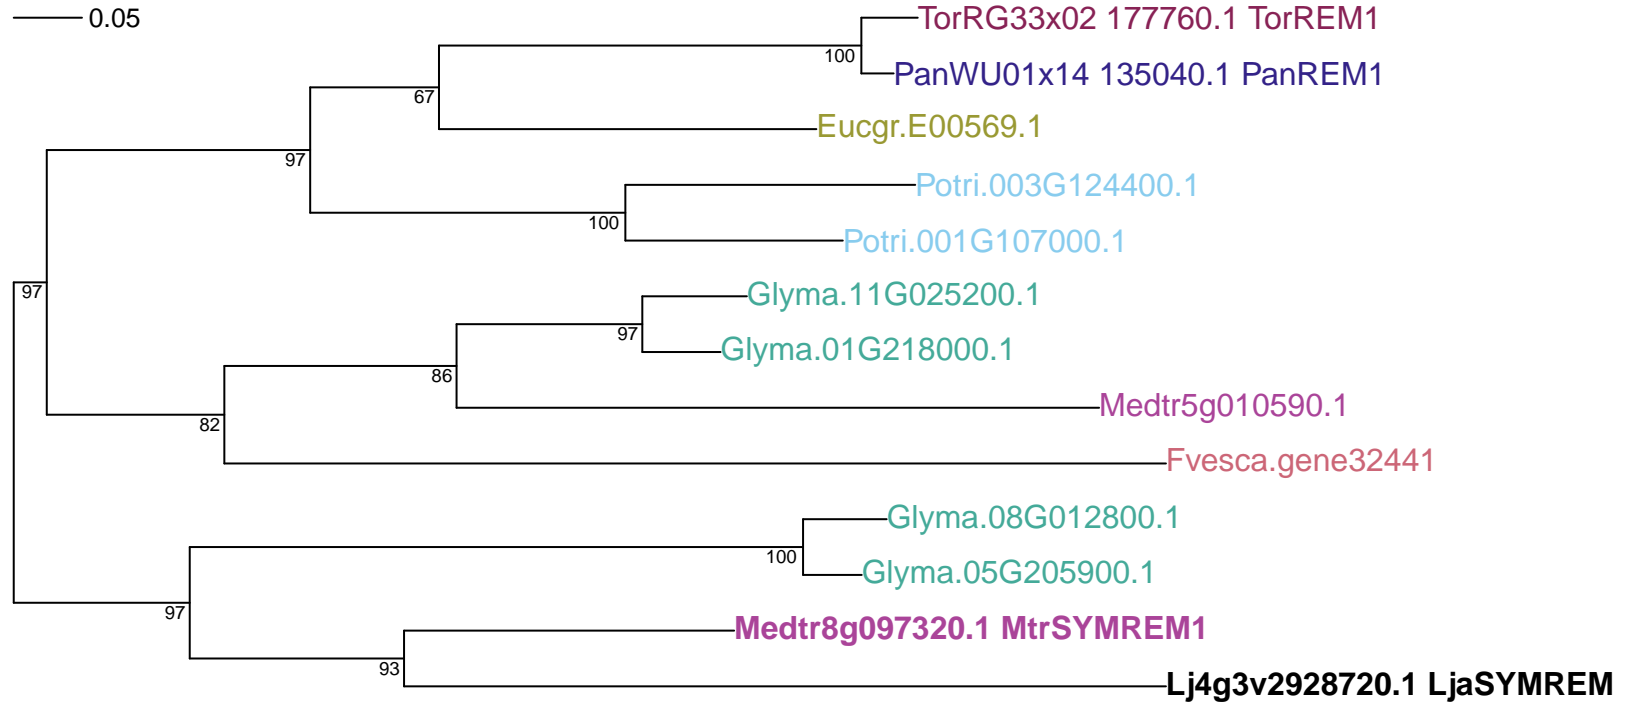

# OG0002964: Nodule & symbiosome development. signal peptidase

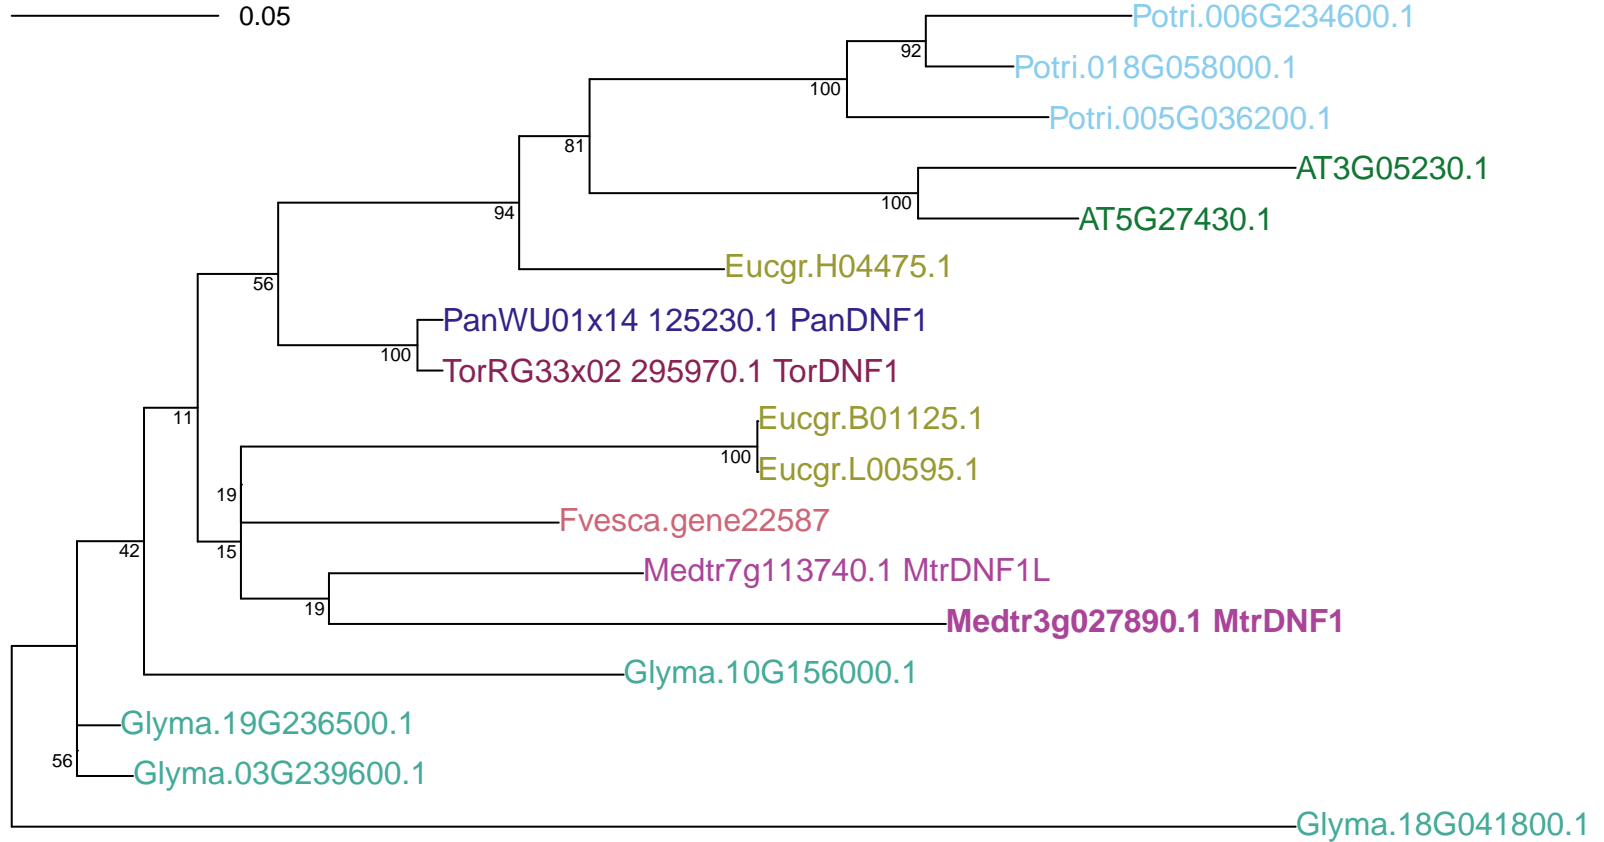

## OG0013491: Nodule & symbiosome development. t-SNARE syntaxin

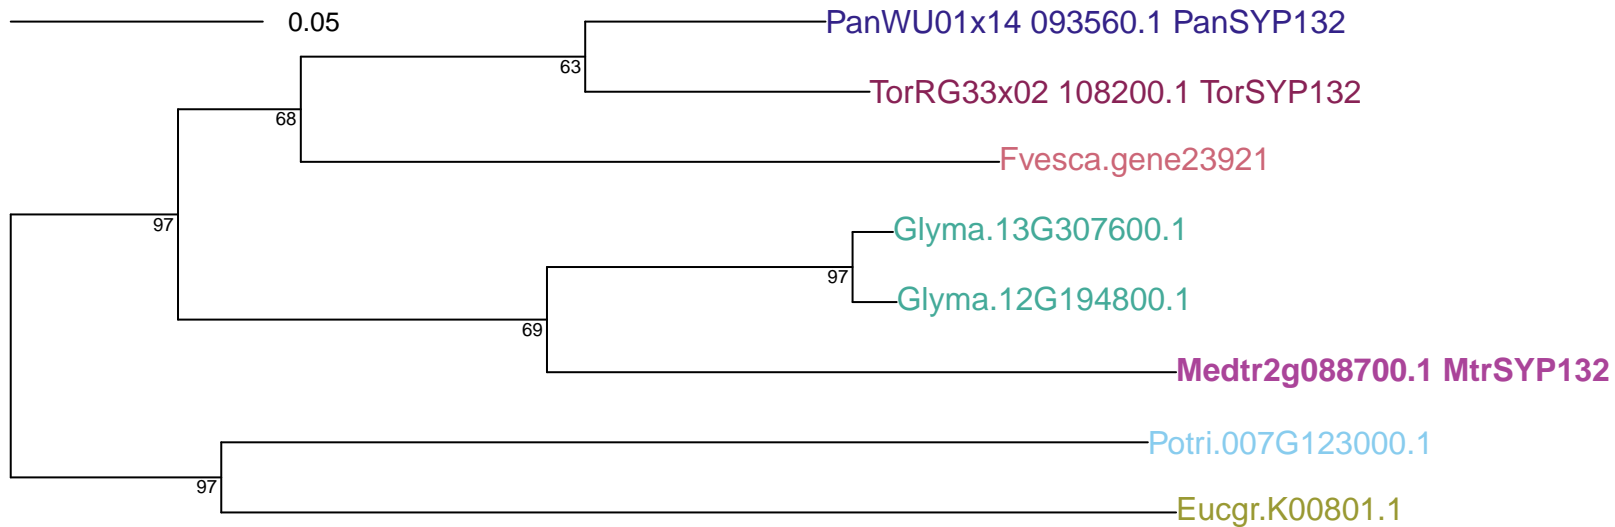

# OG0001731: Nodule & symbiosome development. v-SNARE syntaxin

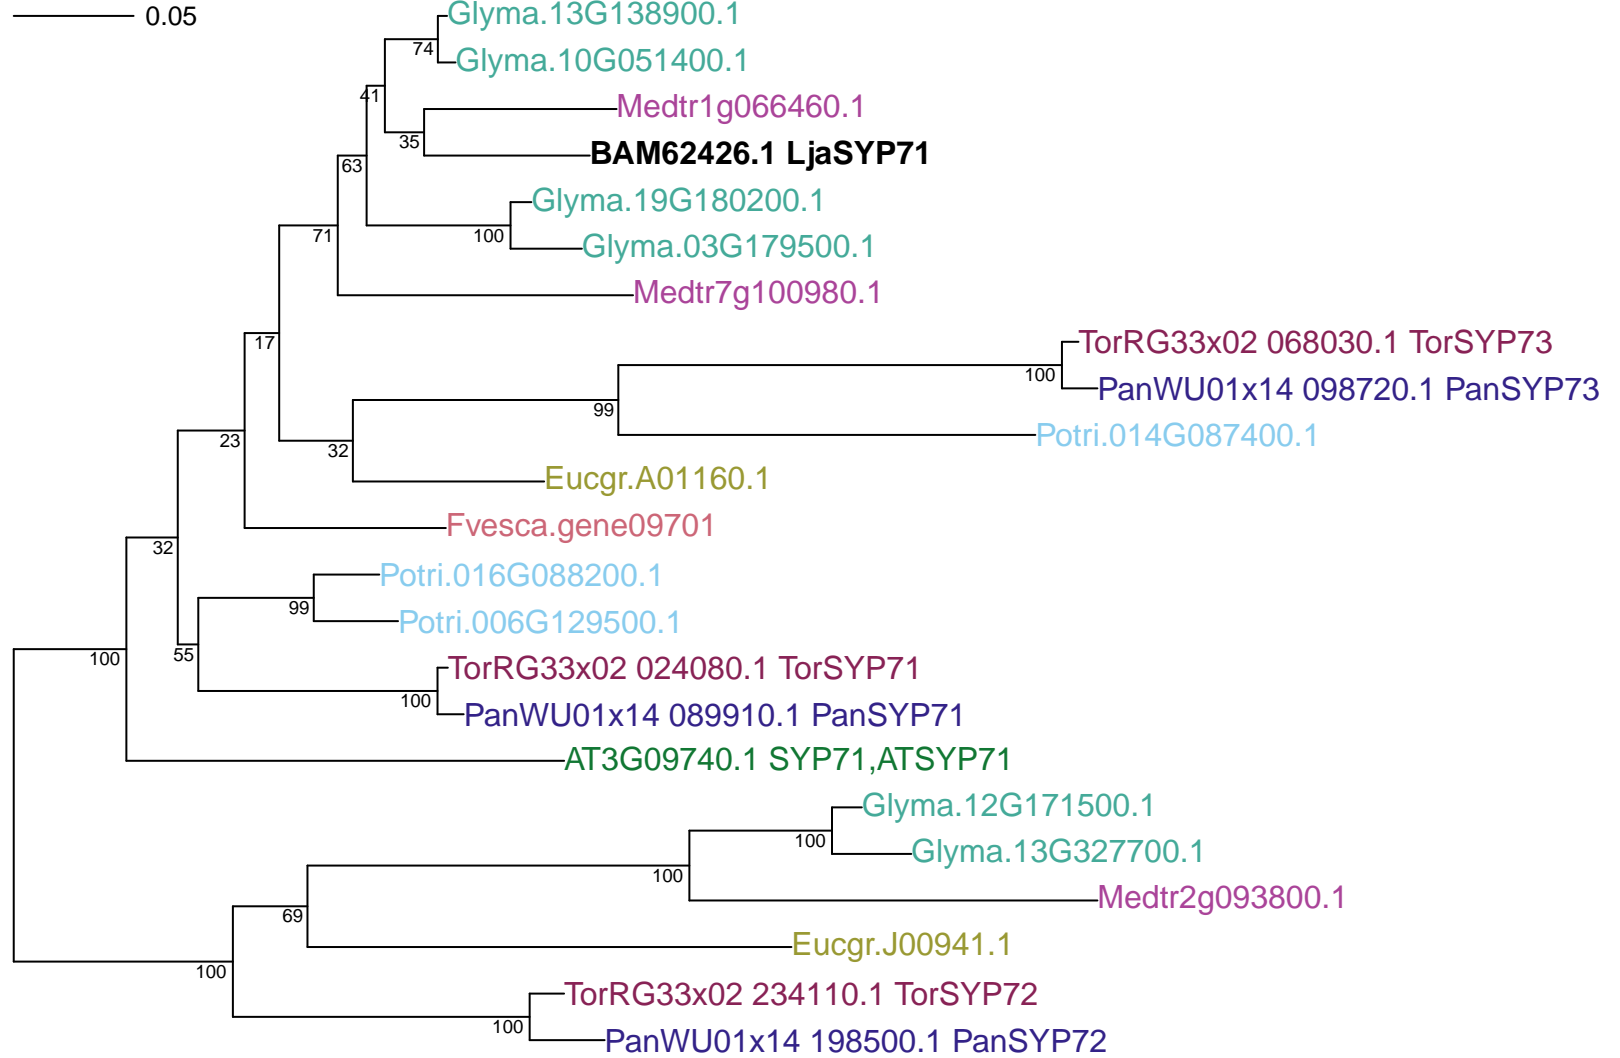

# OG0001468: Nodule & symbiosome development. v-SNARE syntaxin

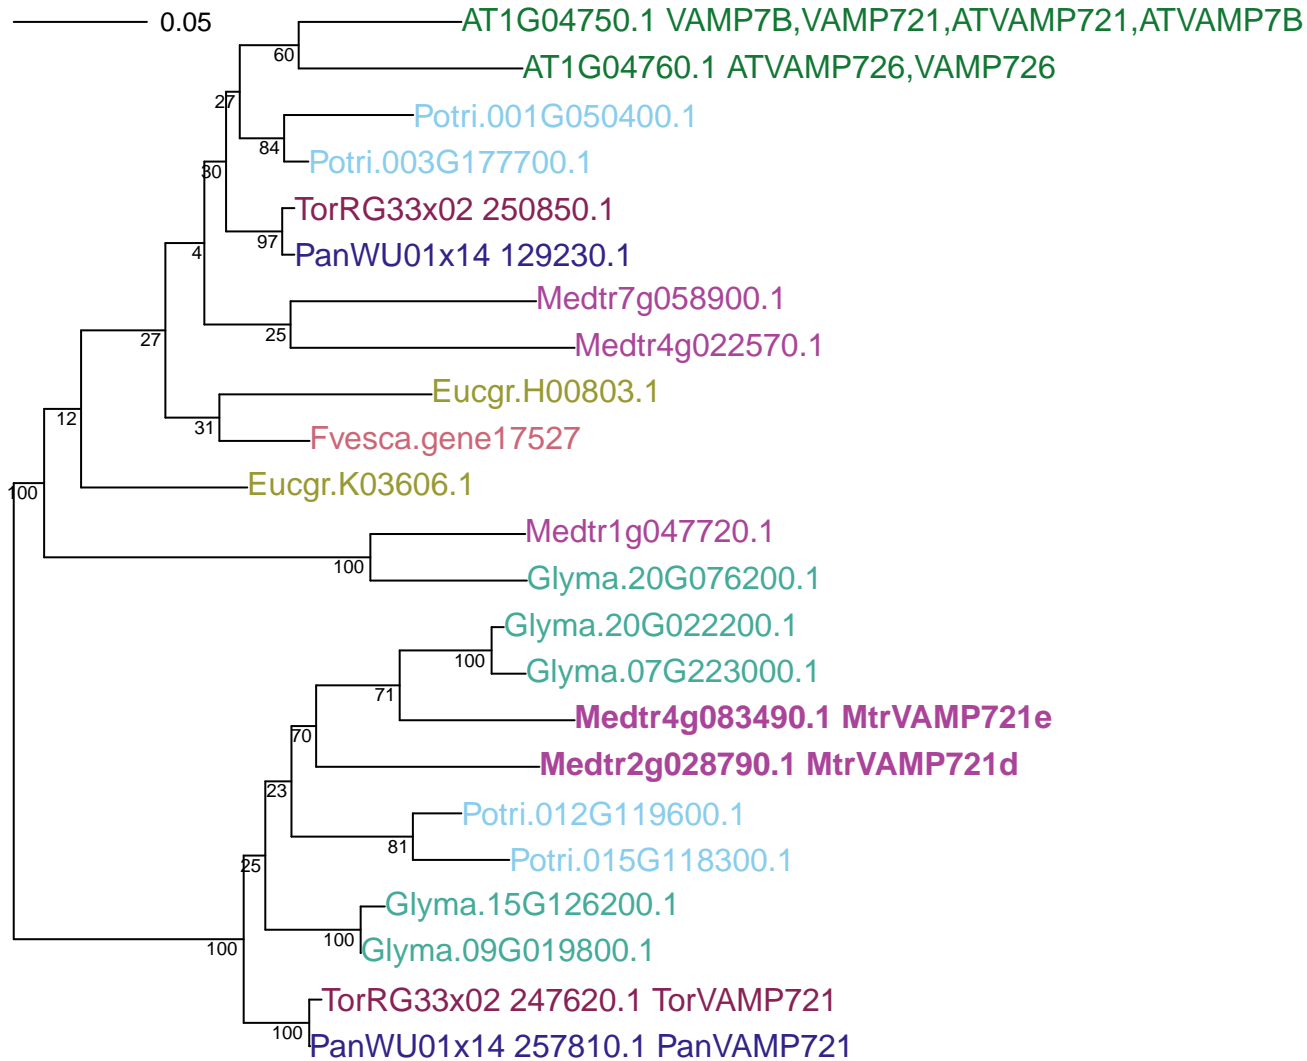

# OG0001133: Systemic signaling. CLV1-type LRR-receptor kinase

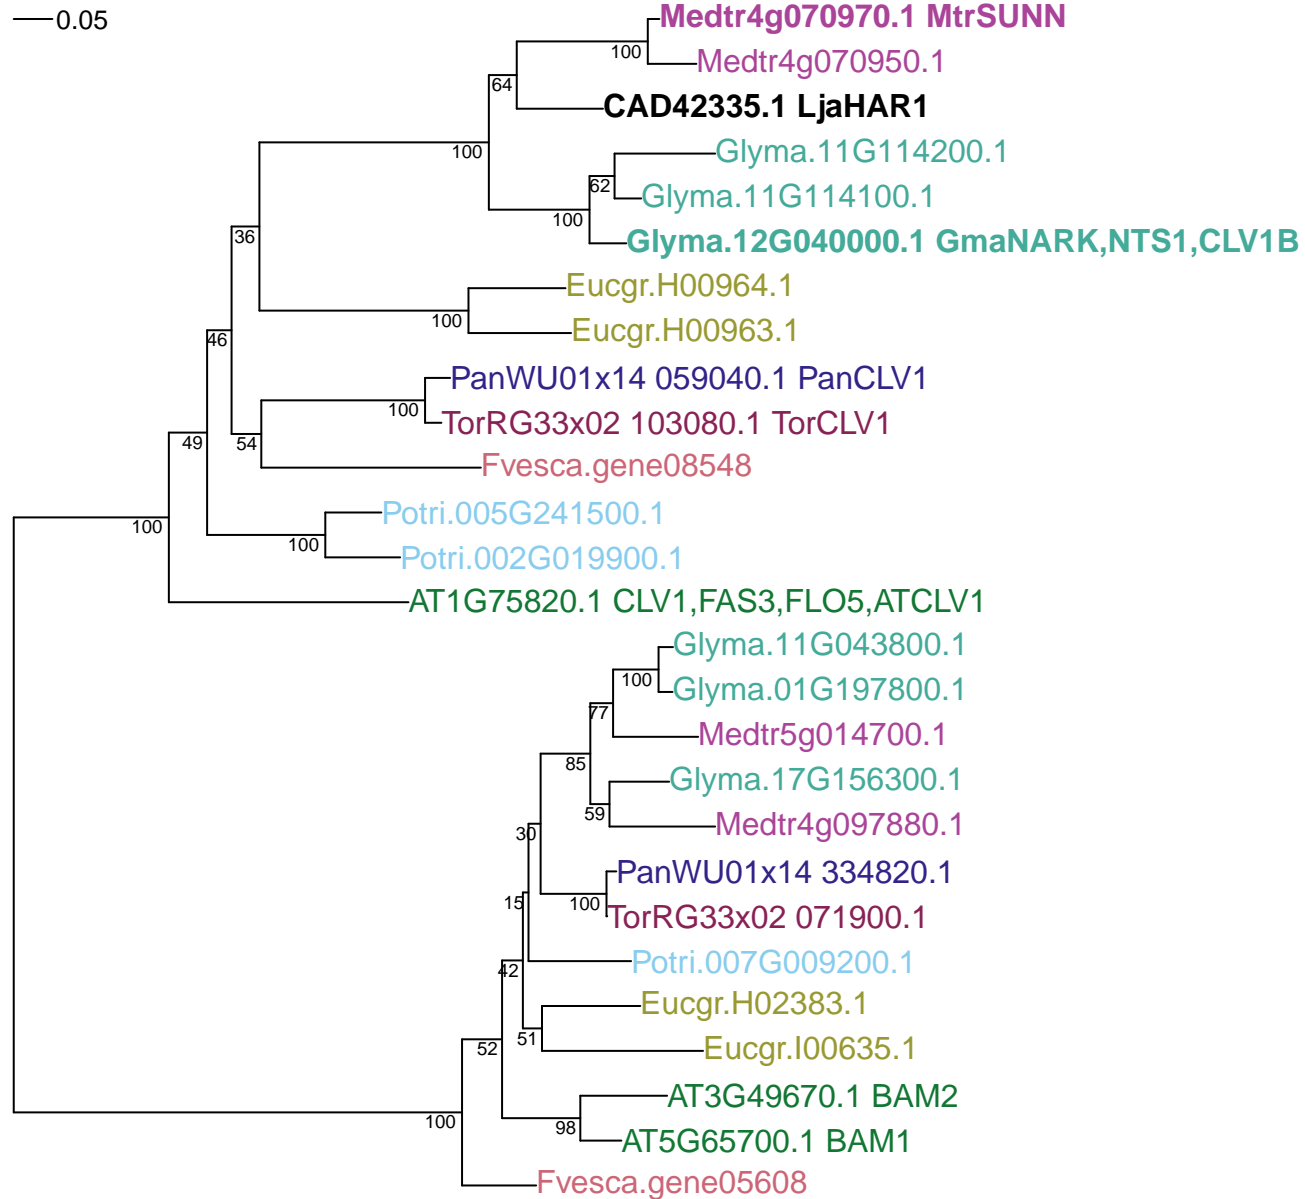



# OG0003324: Systemic signaling. CLI1-type LRR-receptor kinase

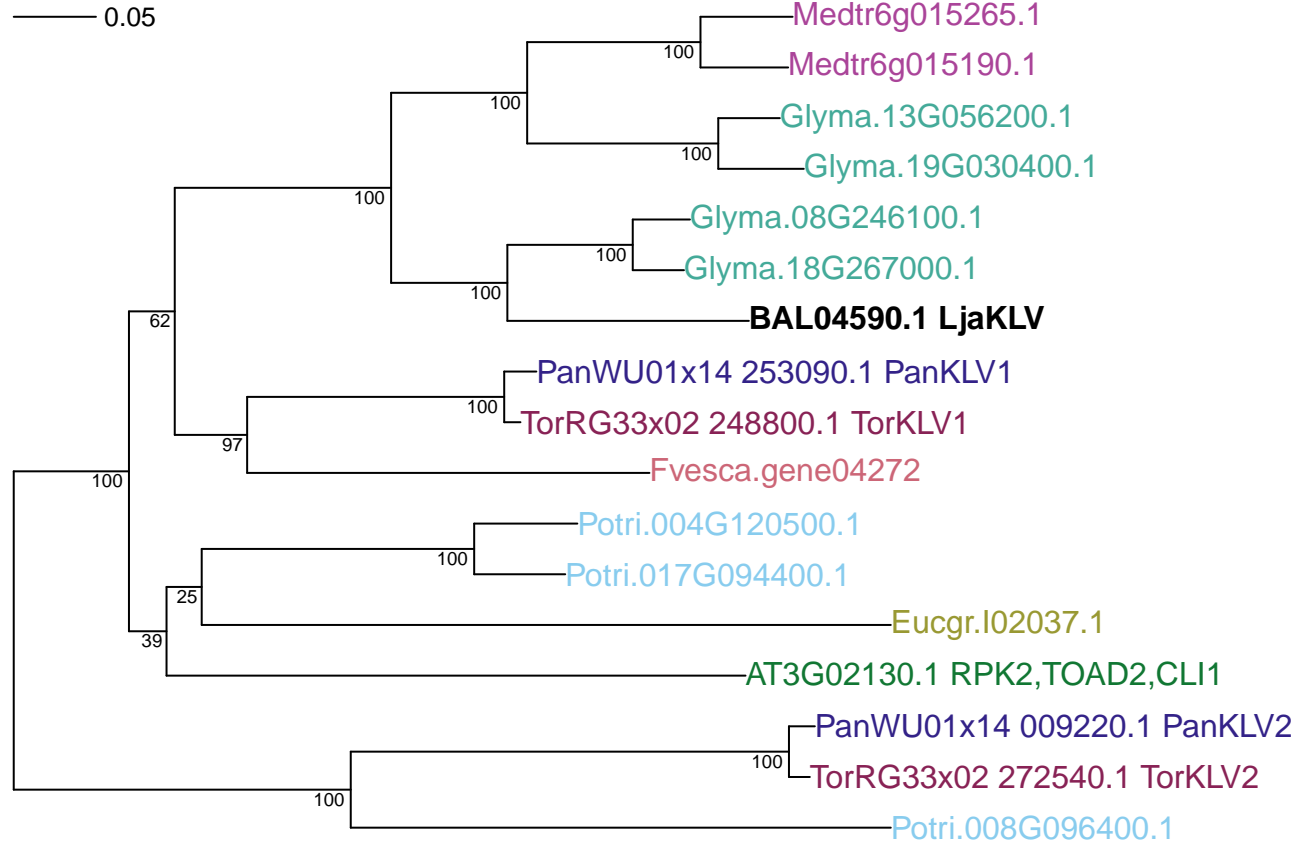

# OG0010087: Systemic signaling. CLV2-type LRR-receptor

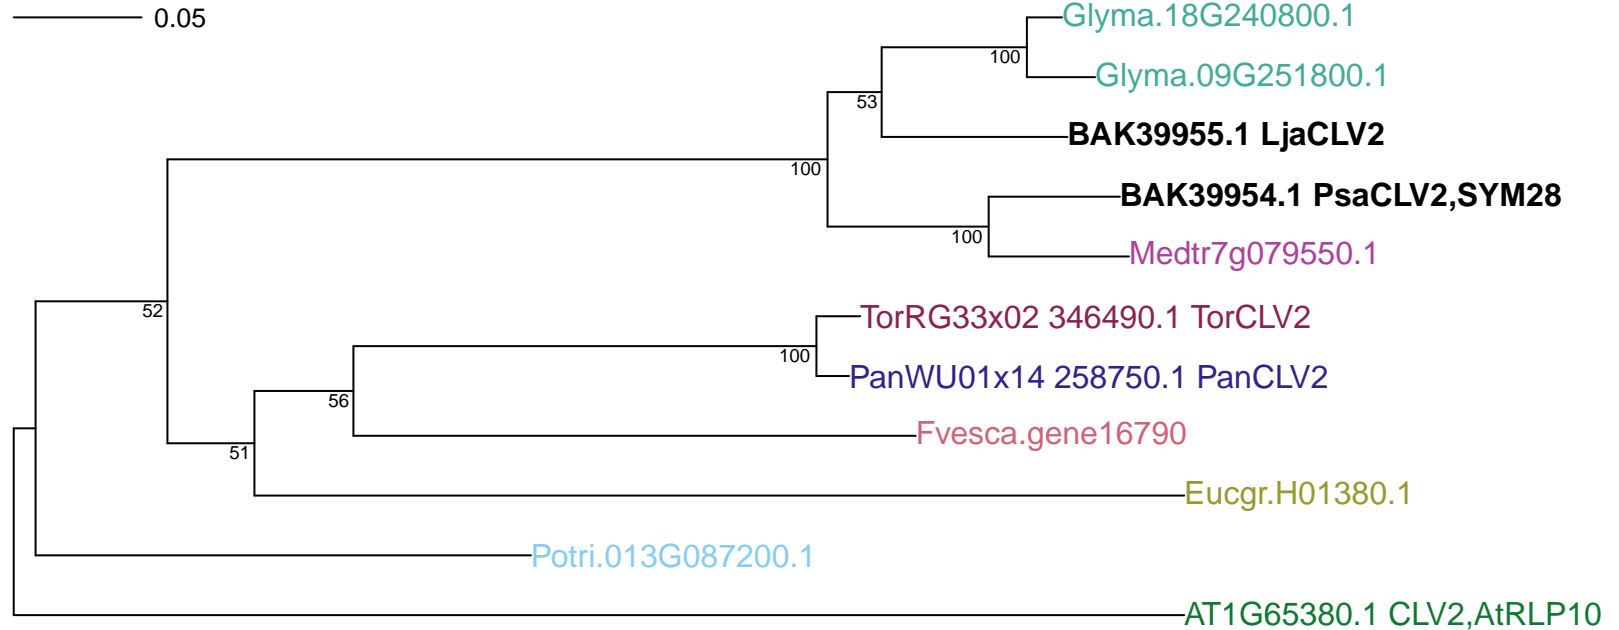

## OG0012170: Systemic signaling. CLE peptide

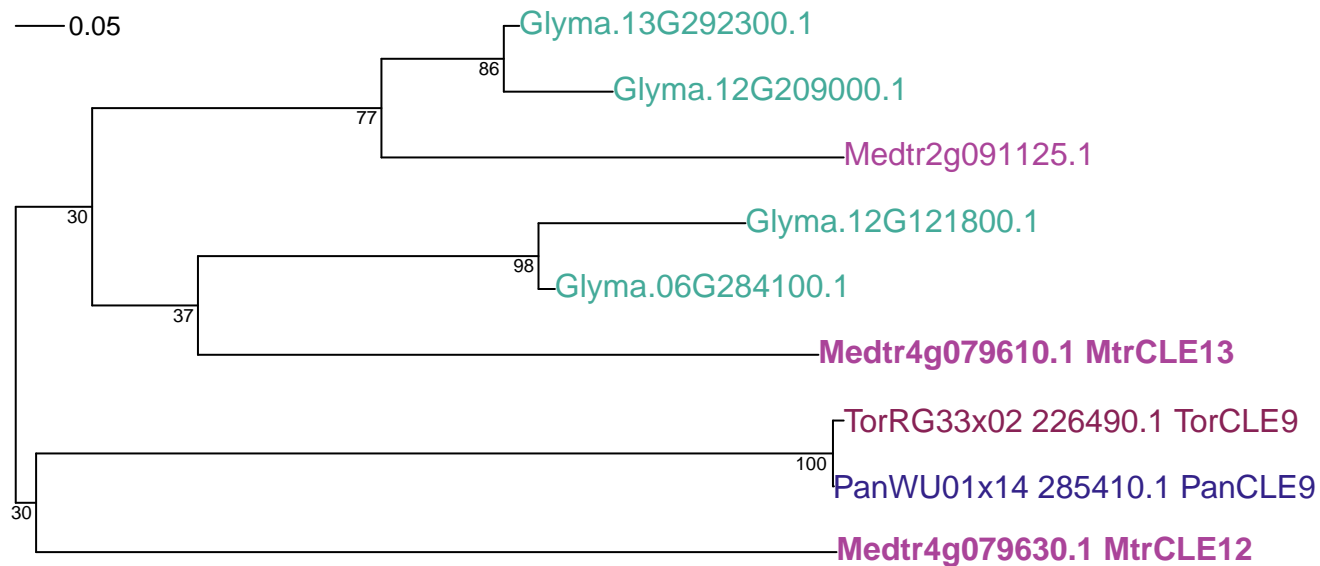

# OG0004187: Systemic signaling. CLE peptide

—0.05

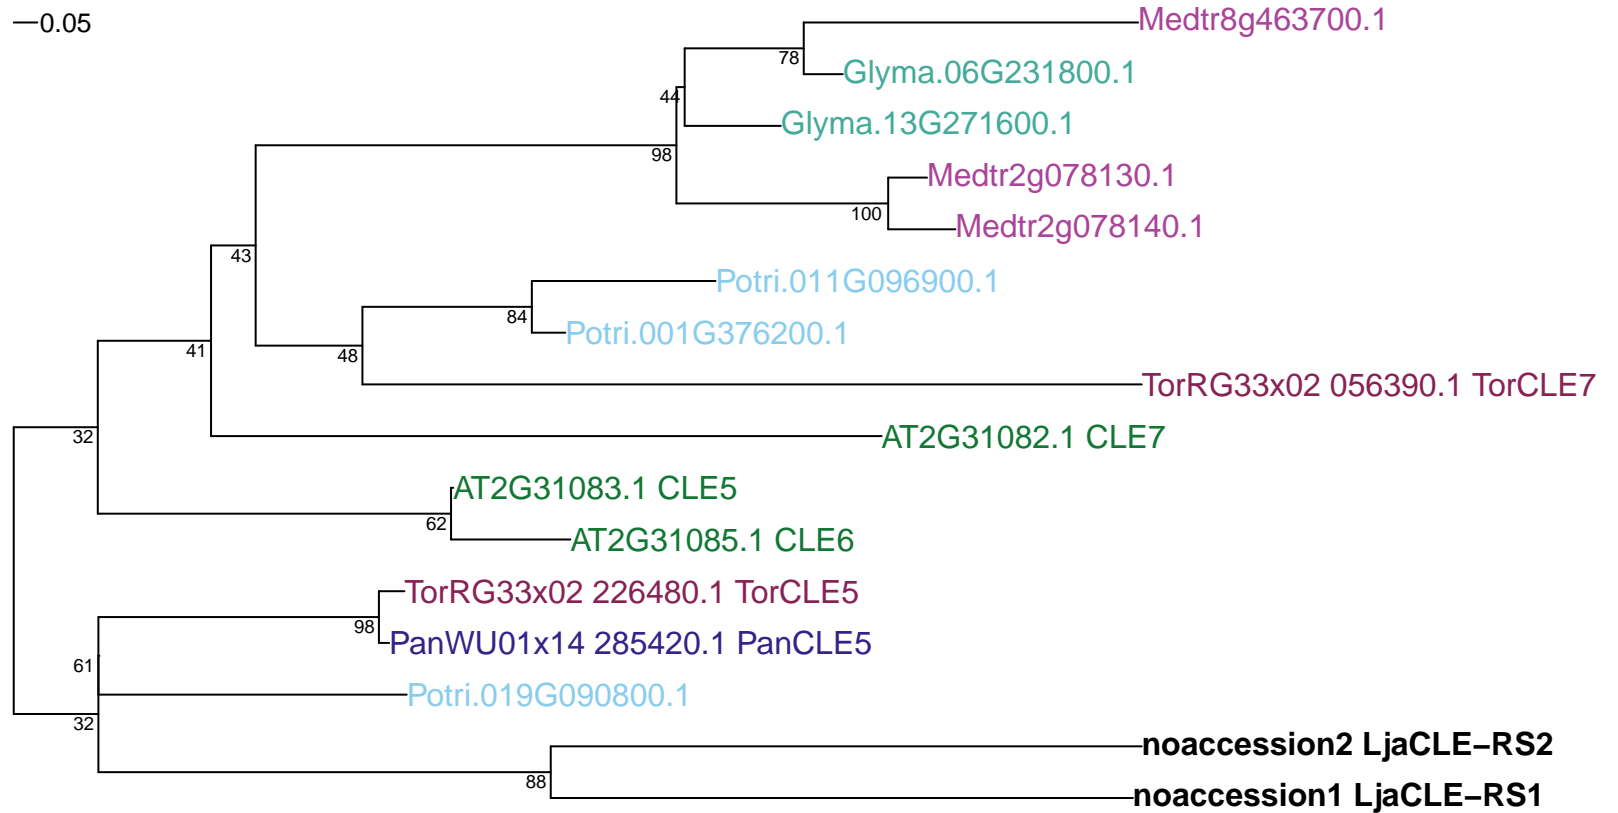

# OG0005040: Systemic signaling. Kelch repeat-containing F-box protein

— 0.05

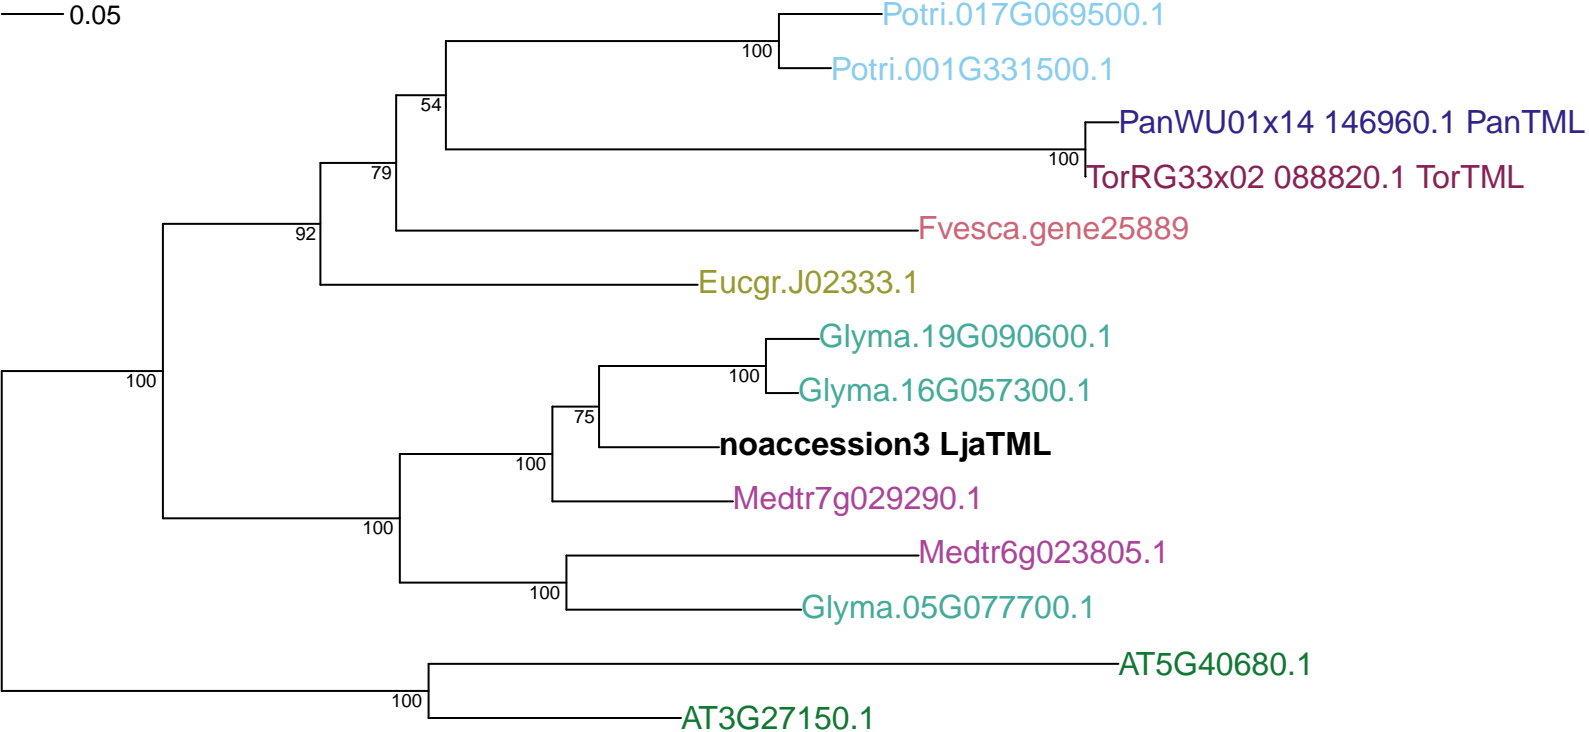

# OG0000779: Systemic signaling. arabinosyl transferase

— 0.05

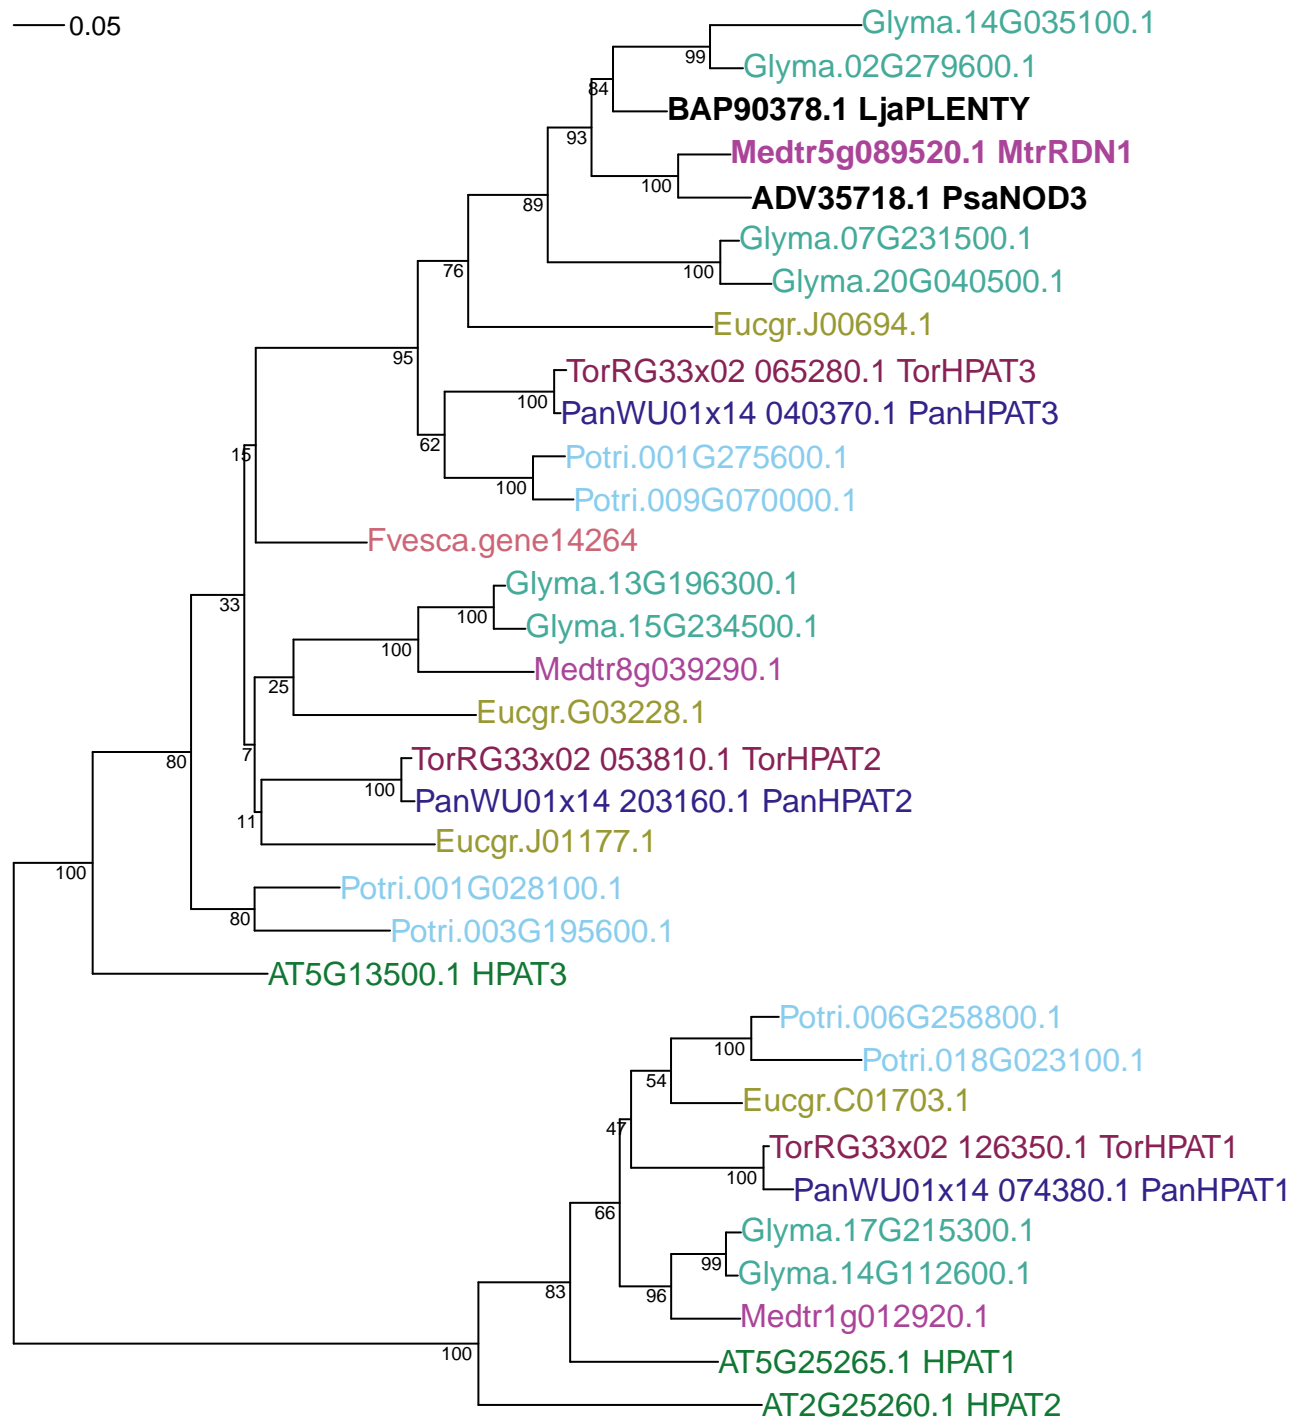

## OG0007520: Hormones. essential for ethylene mediated signalling

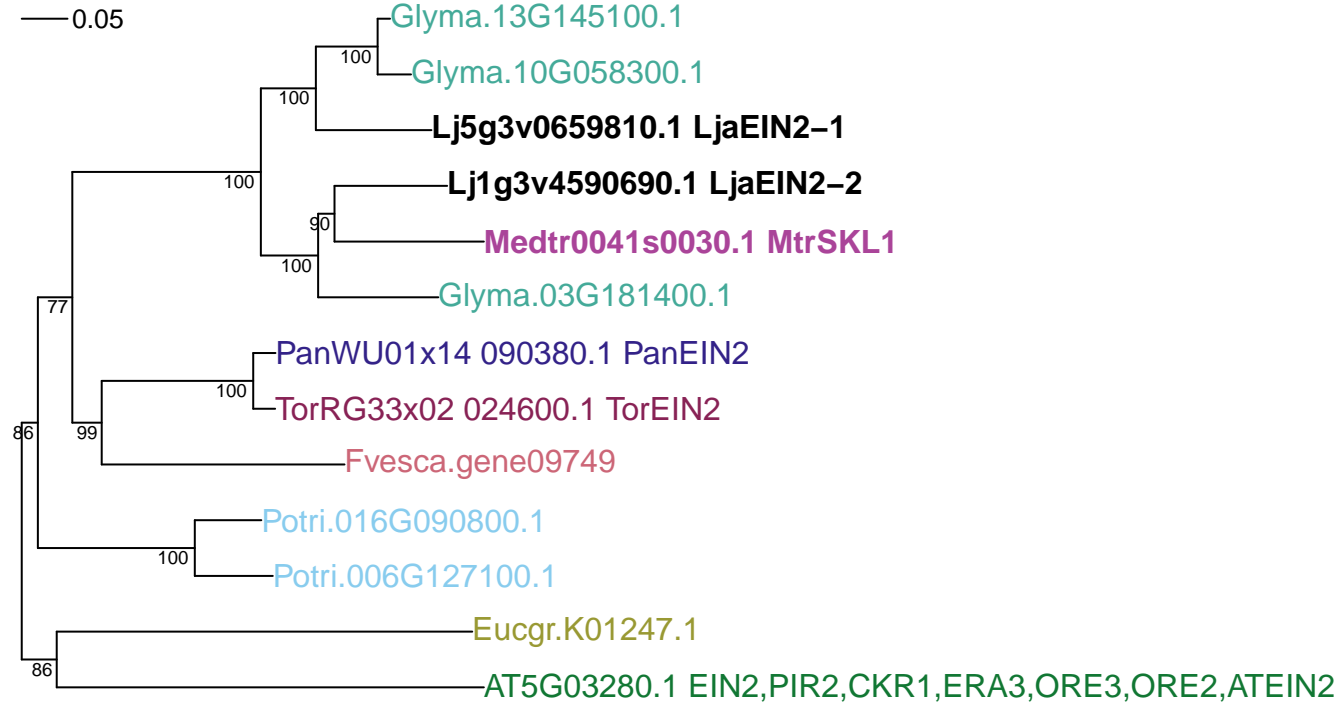

# OG0010632: Hormones. Histidine kinase Cytokinin receptor

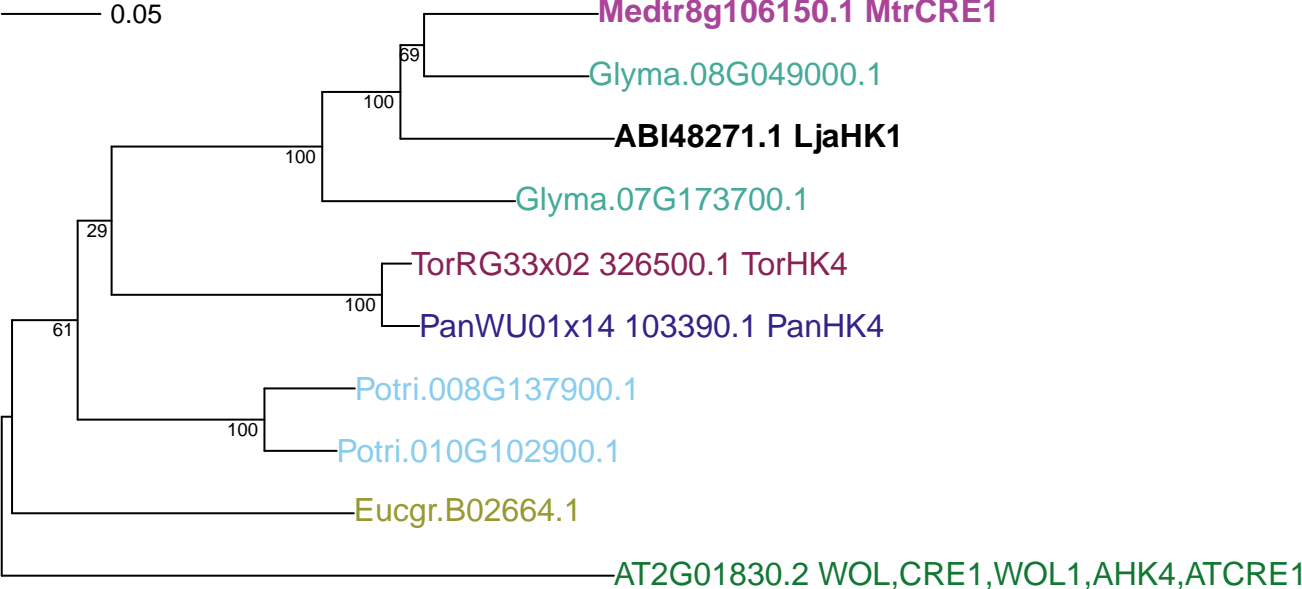



# OG0001173: Hormones. Isopentenyltransferase

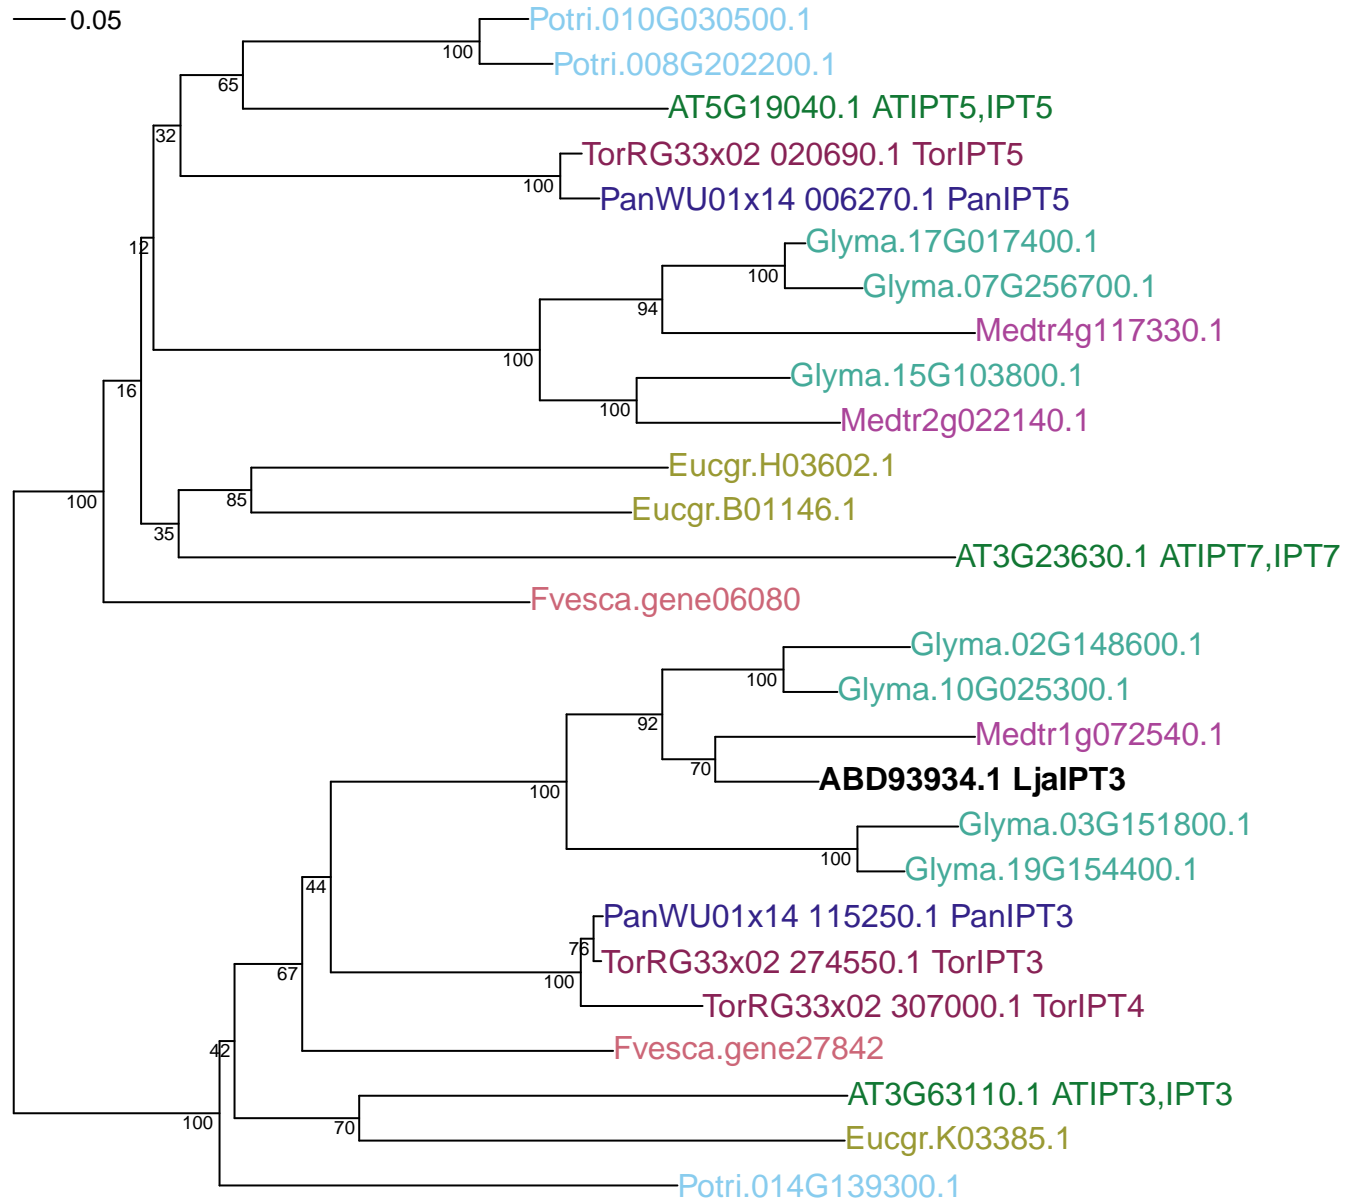

# OG0009417: Hormones. cytokinin oxidase / dehydrogenase

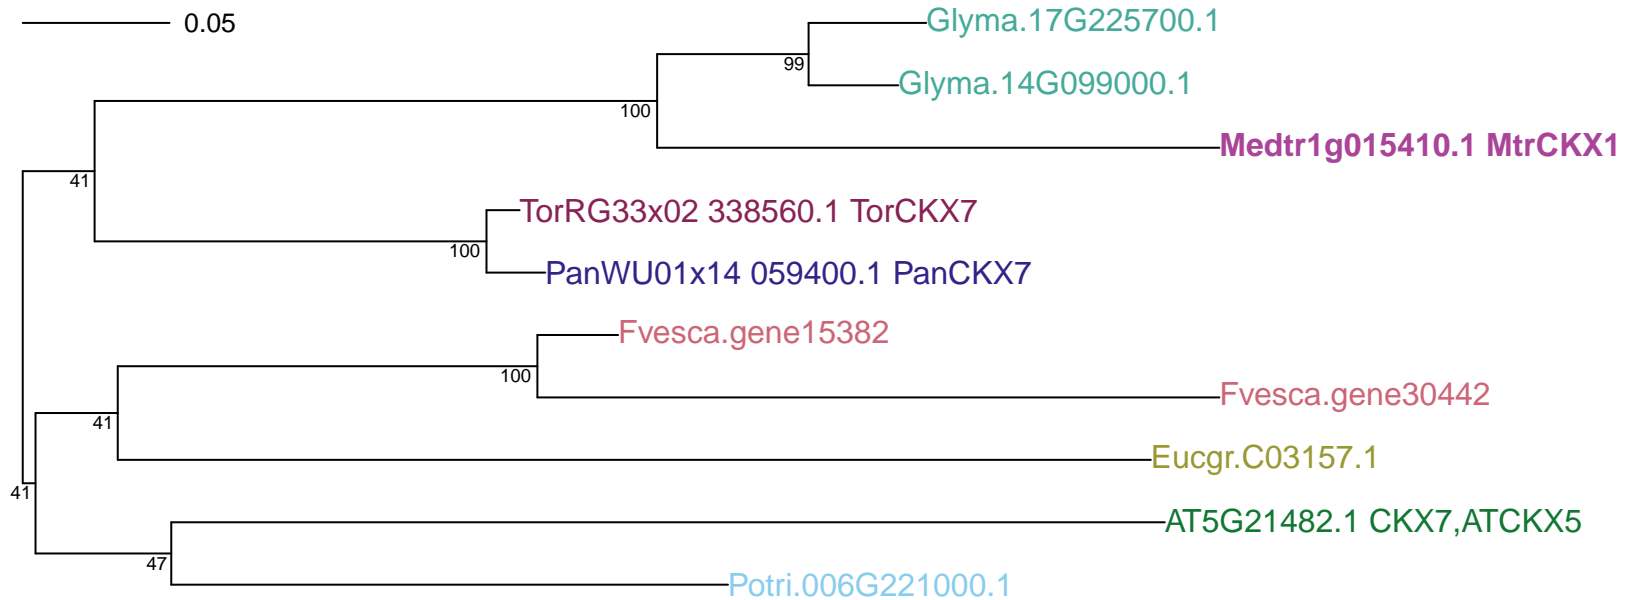

# OG0001053: Hormones. cytokinin oxidase / dehydrogenase

— 0.05

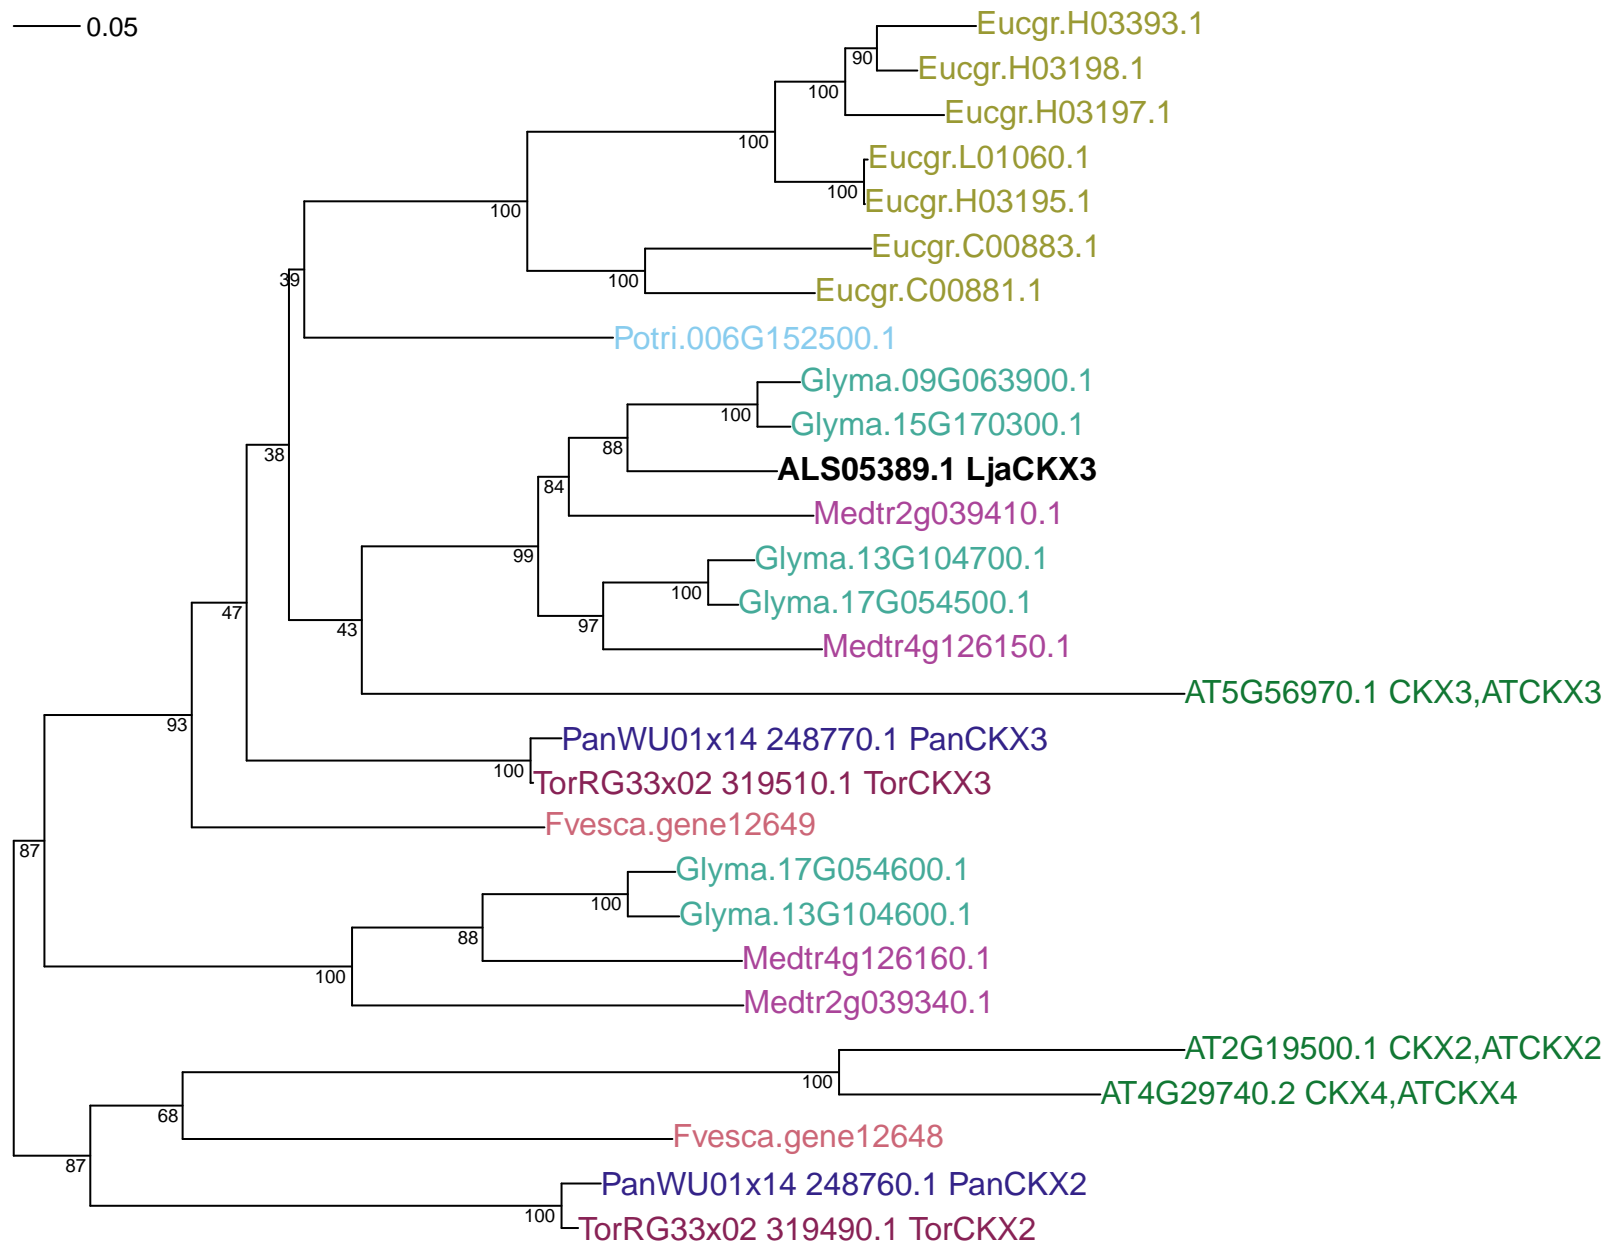

# OG0000946: Hormones. Cytokinin type-A Response Regulator

—0.05

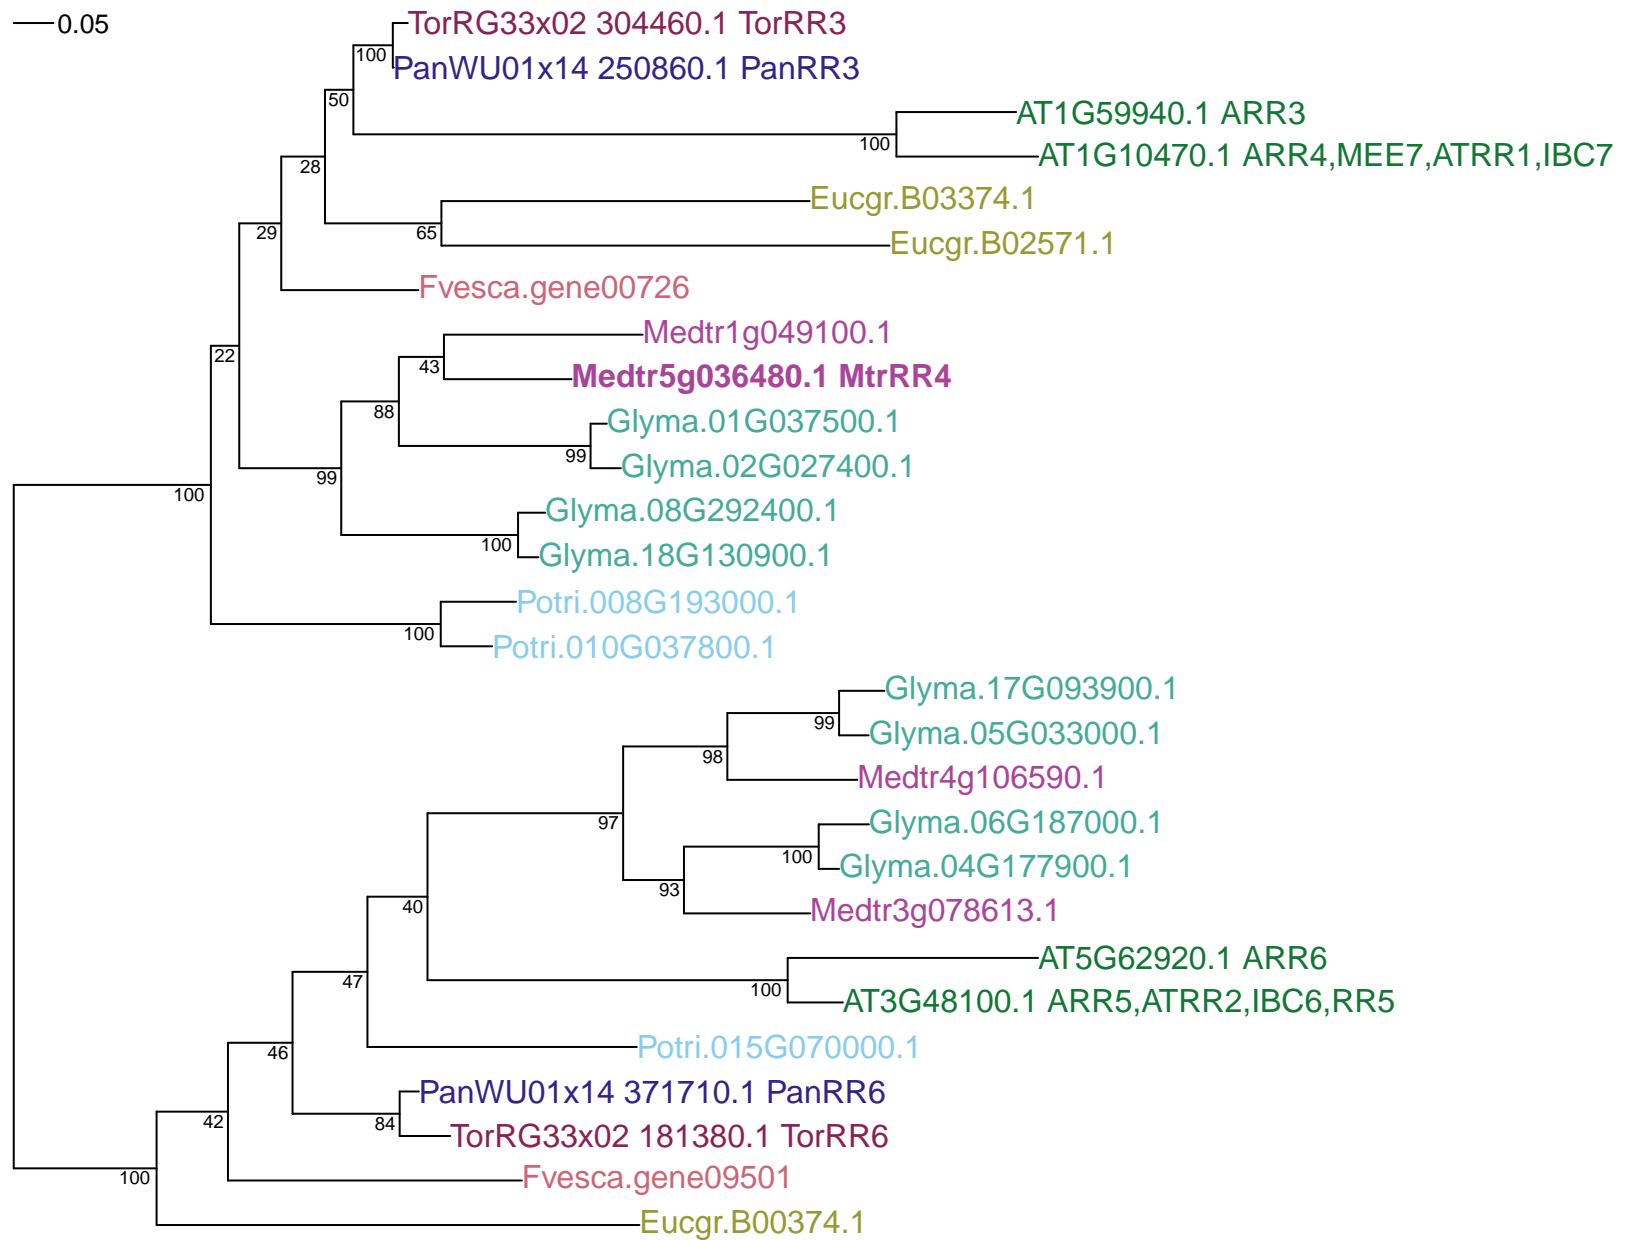

# OG0001052: Hormones. Cytokinin type-A Response Regulator

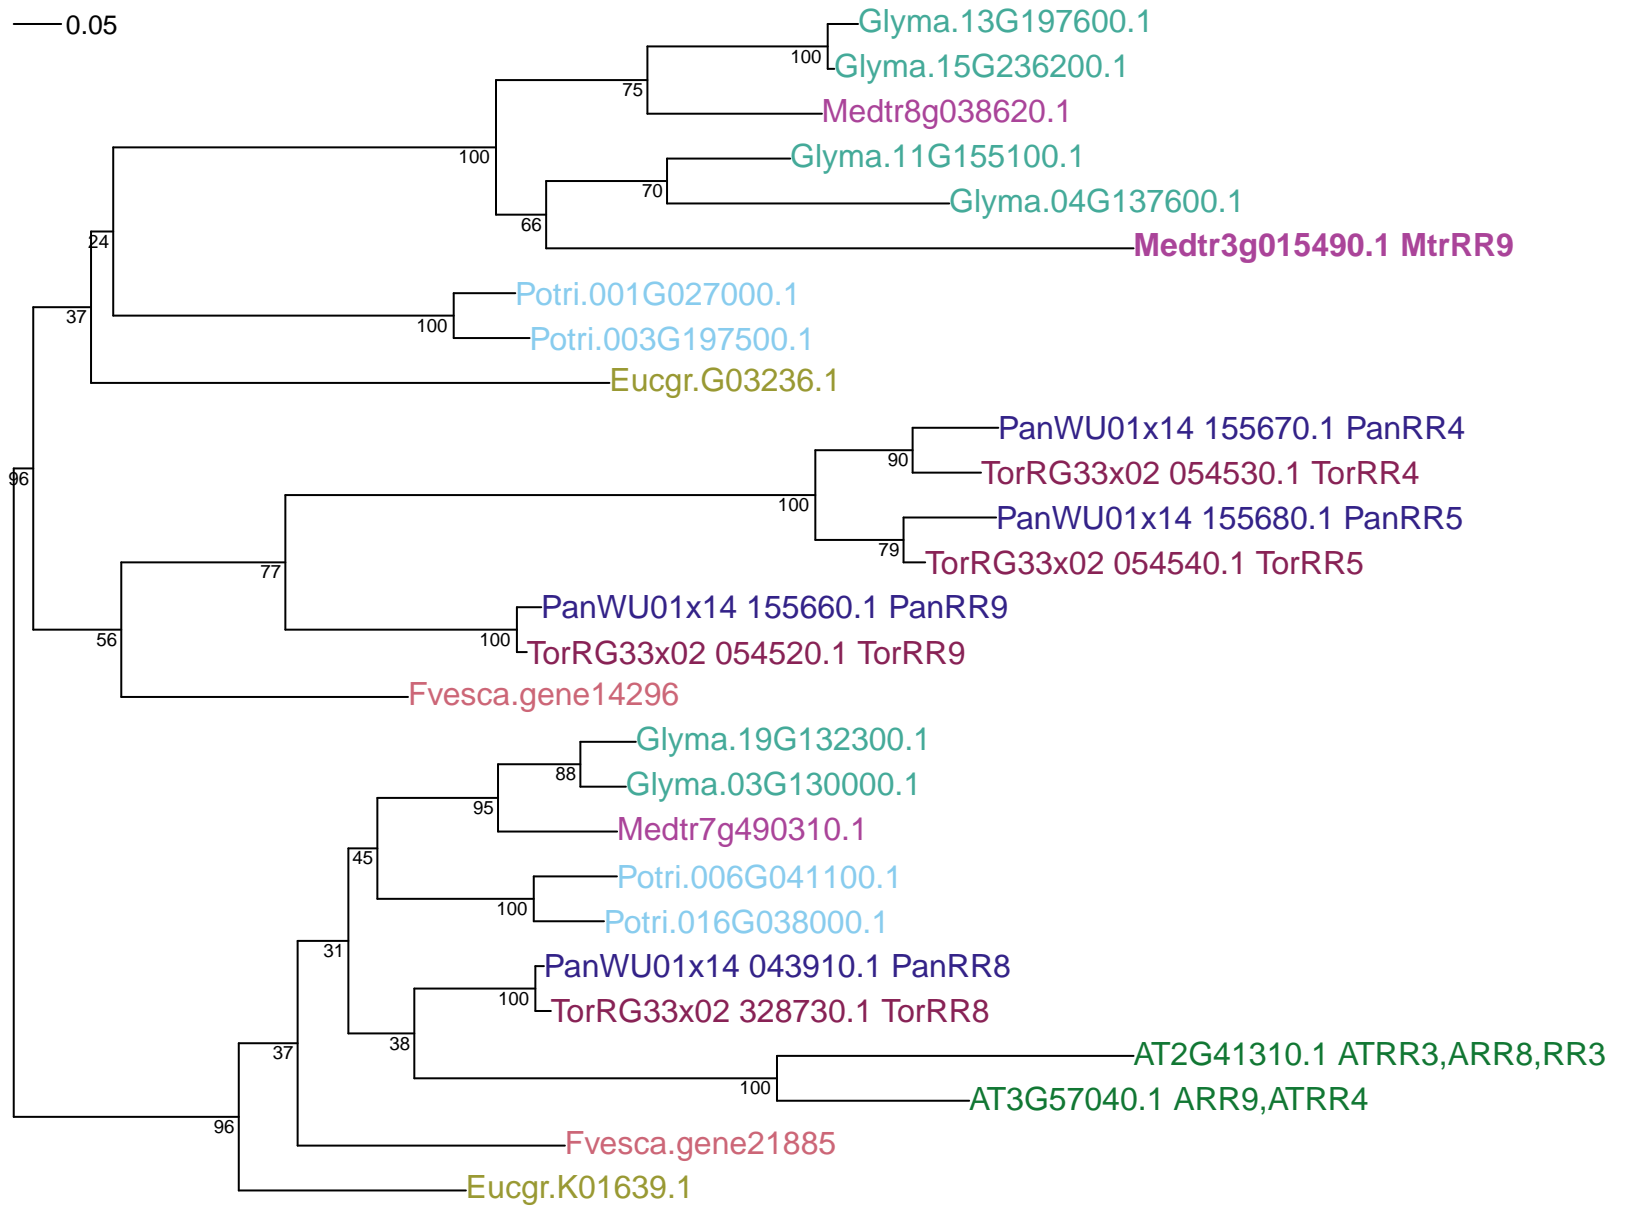

# OG0002725: Hormones. Carotene Hydroxylase

—0.05

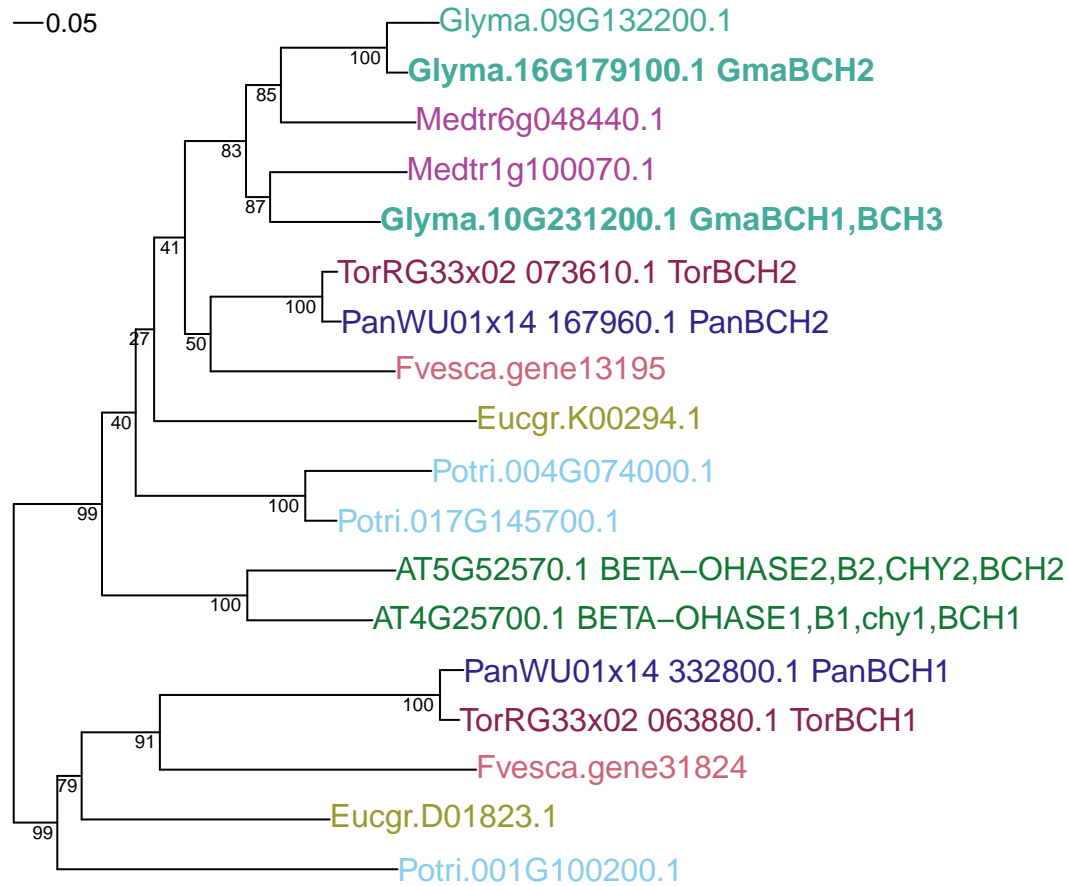

# OG0006580: Hormones. carotene isomerase

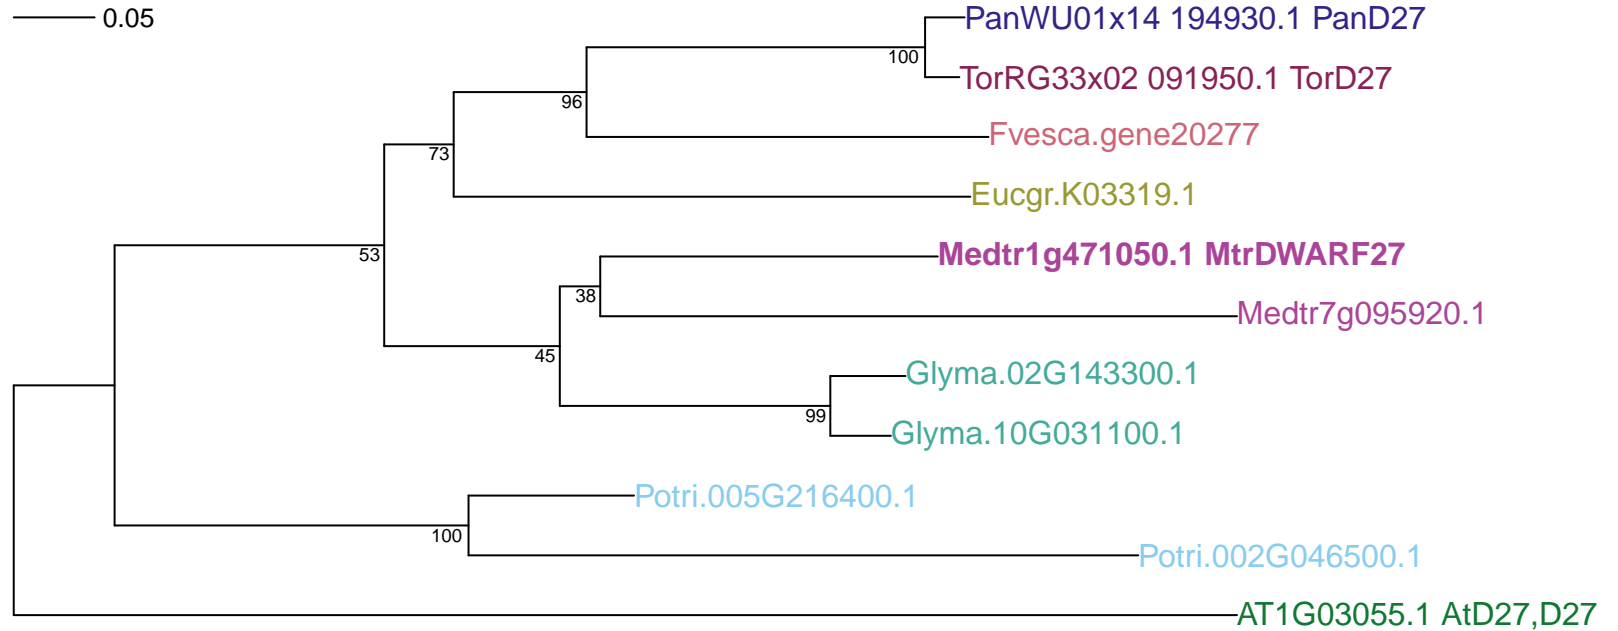

# OG0010543: Hormones. carotenoid cleavage dioxygenase

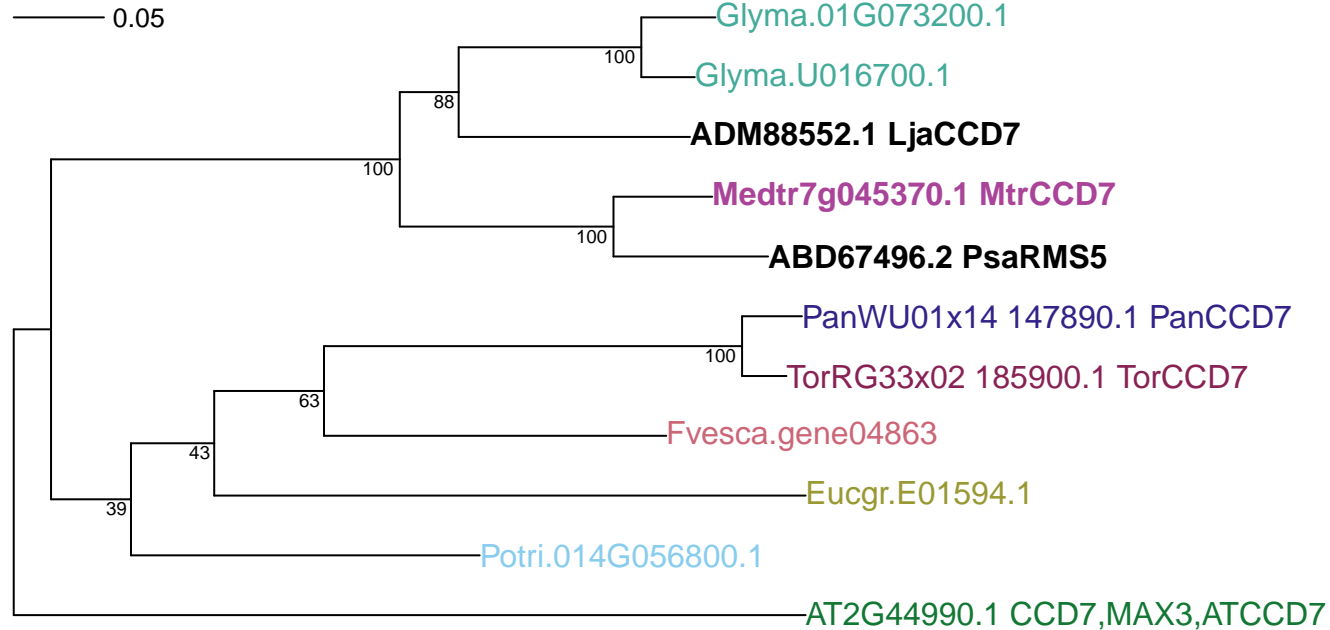



# OG0006118: Hormones. carotenoid cleavage dioxygenase

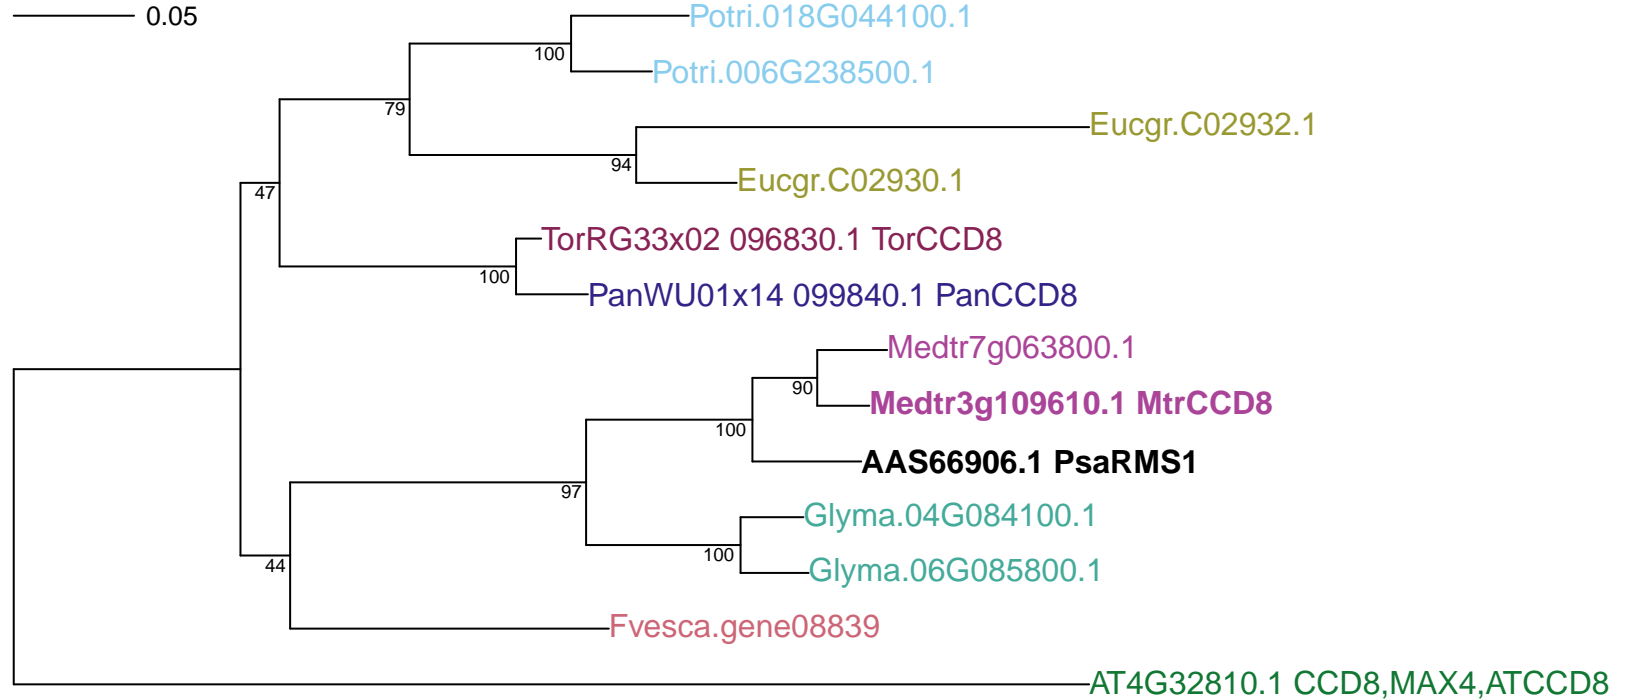

# OG0000957: Transporters. ammonium transporter

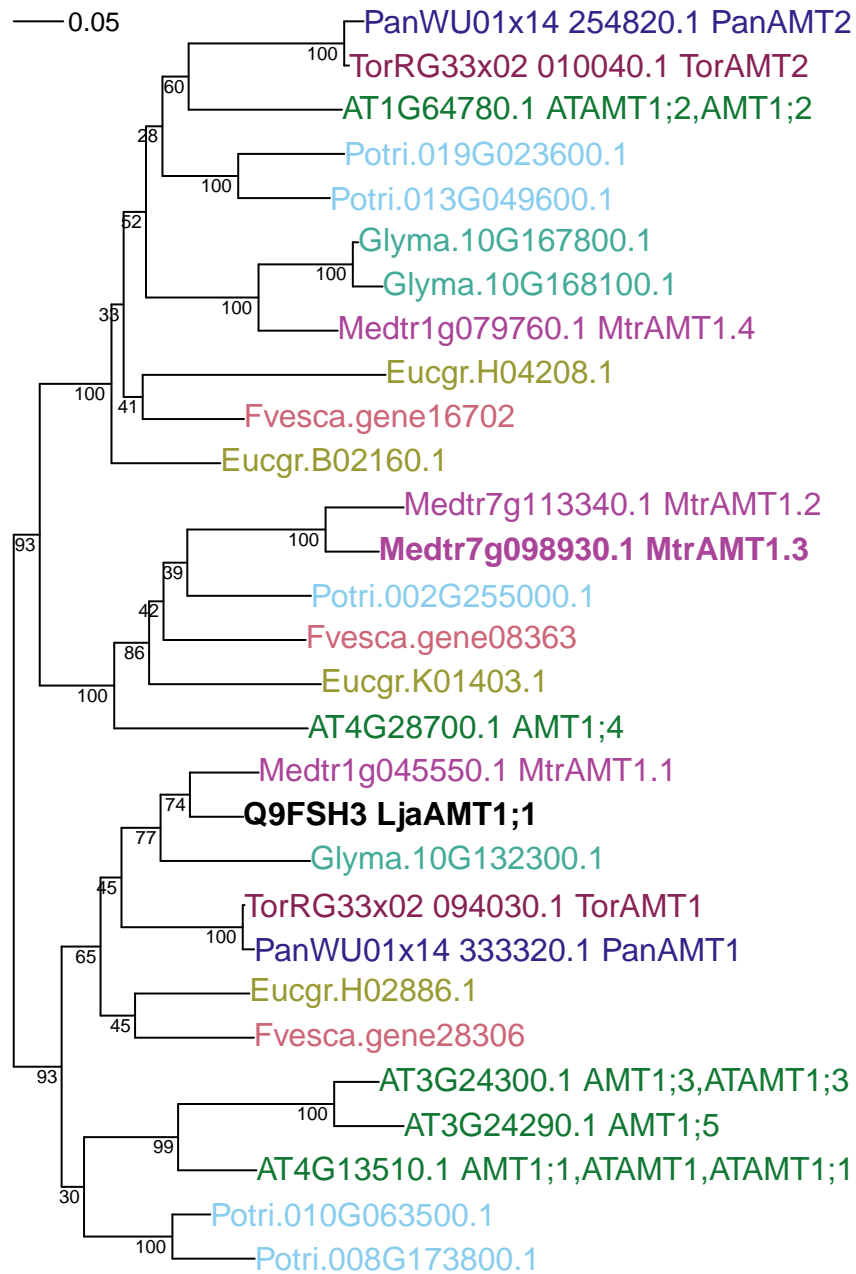

# OG0000407: Transporters. anion transporter

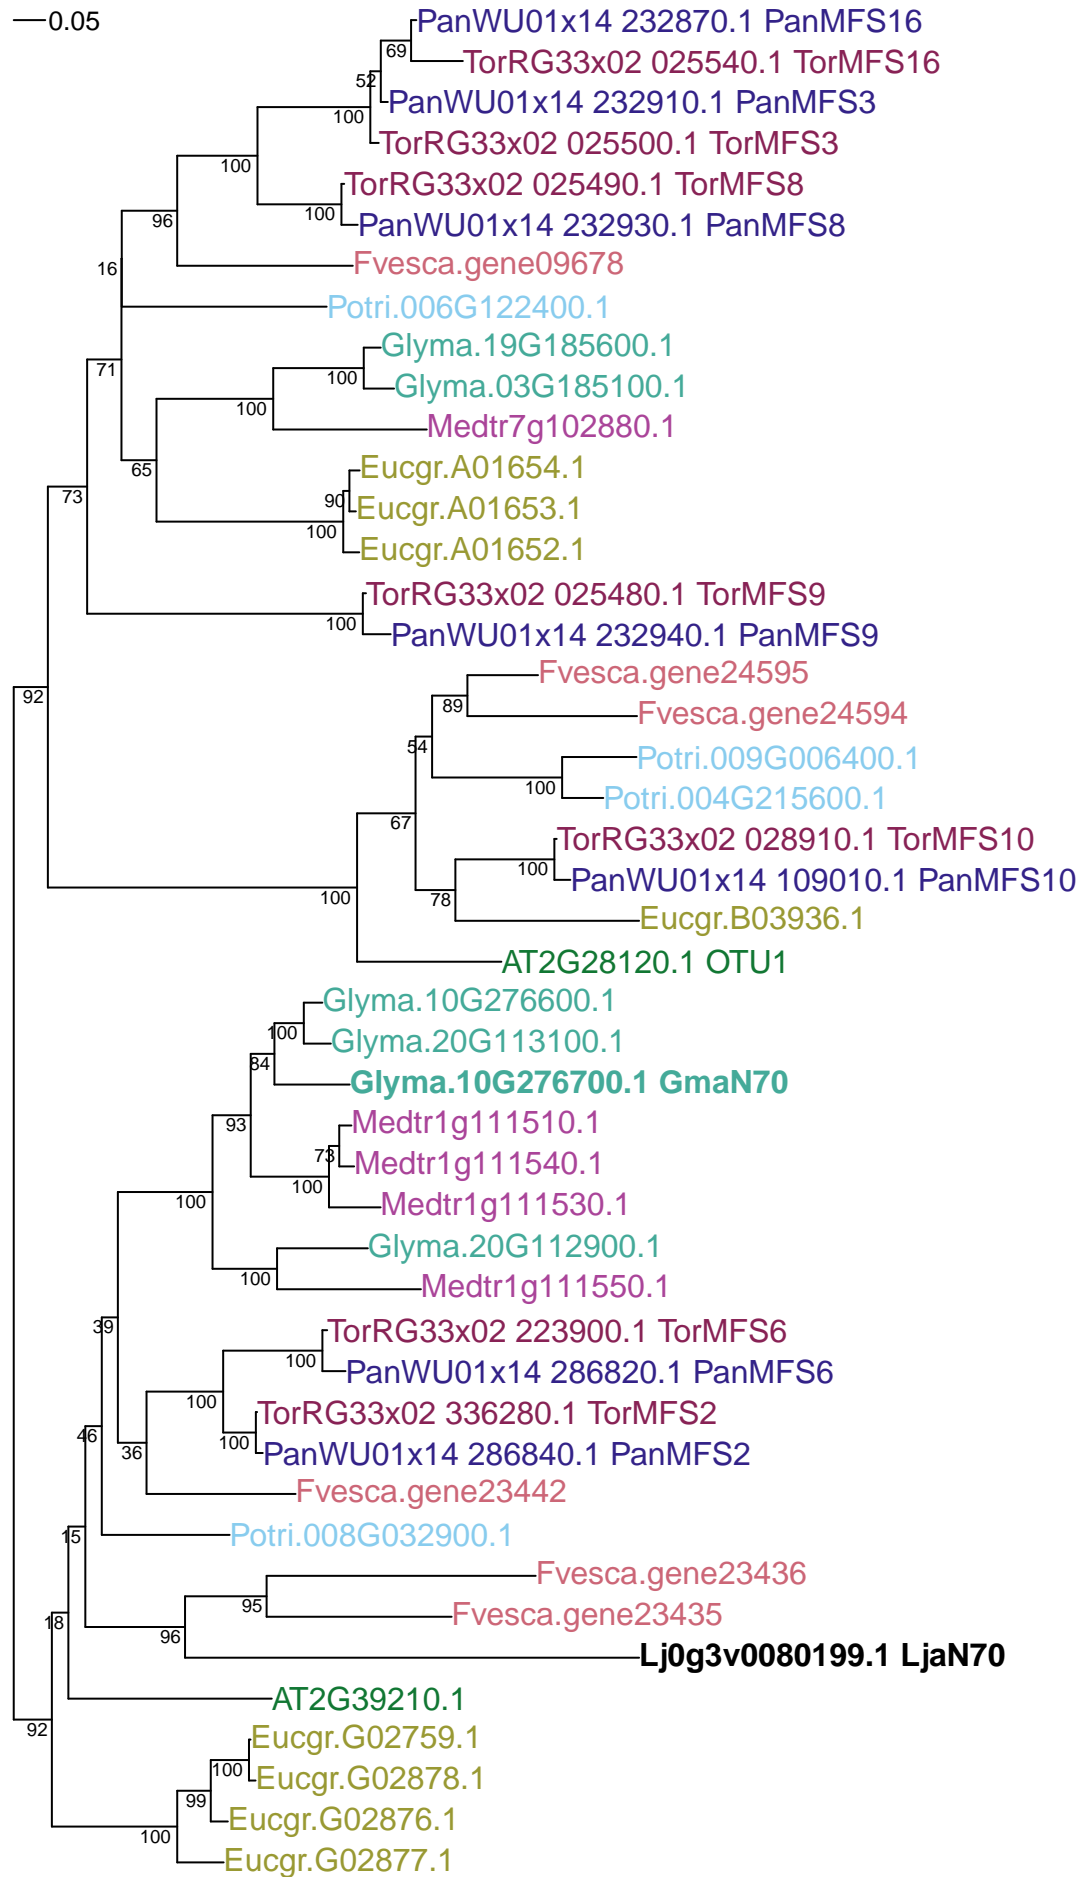

# OG0000659: Transporters. Aquaporin

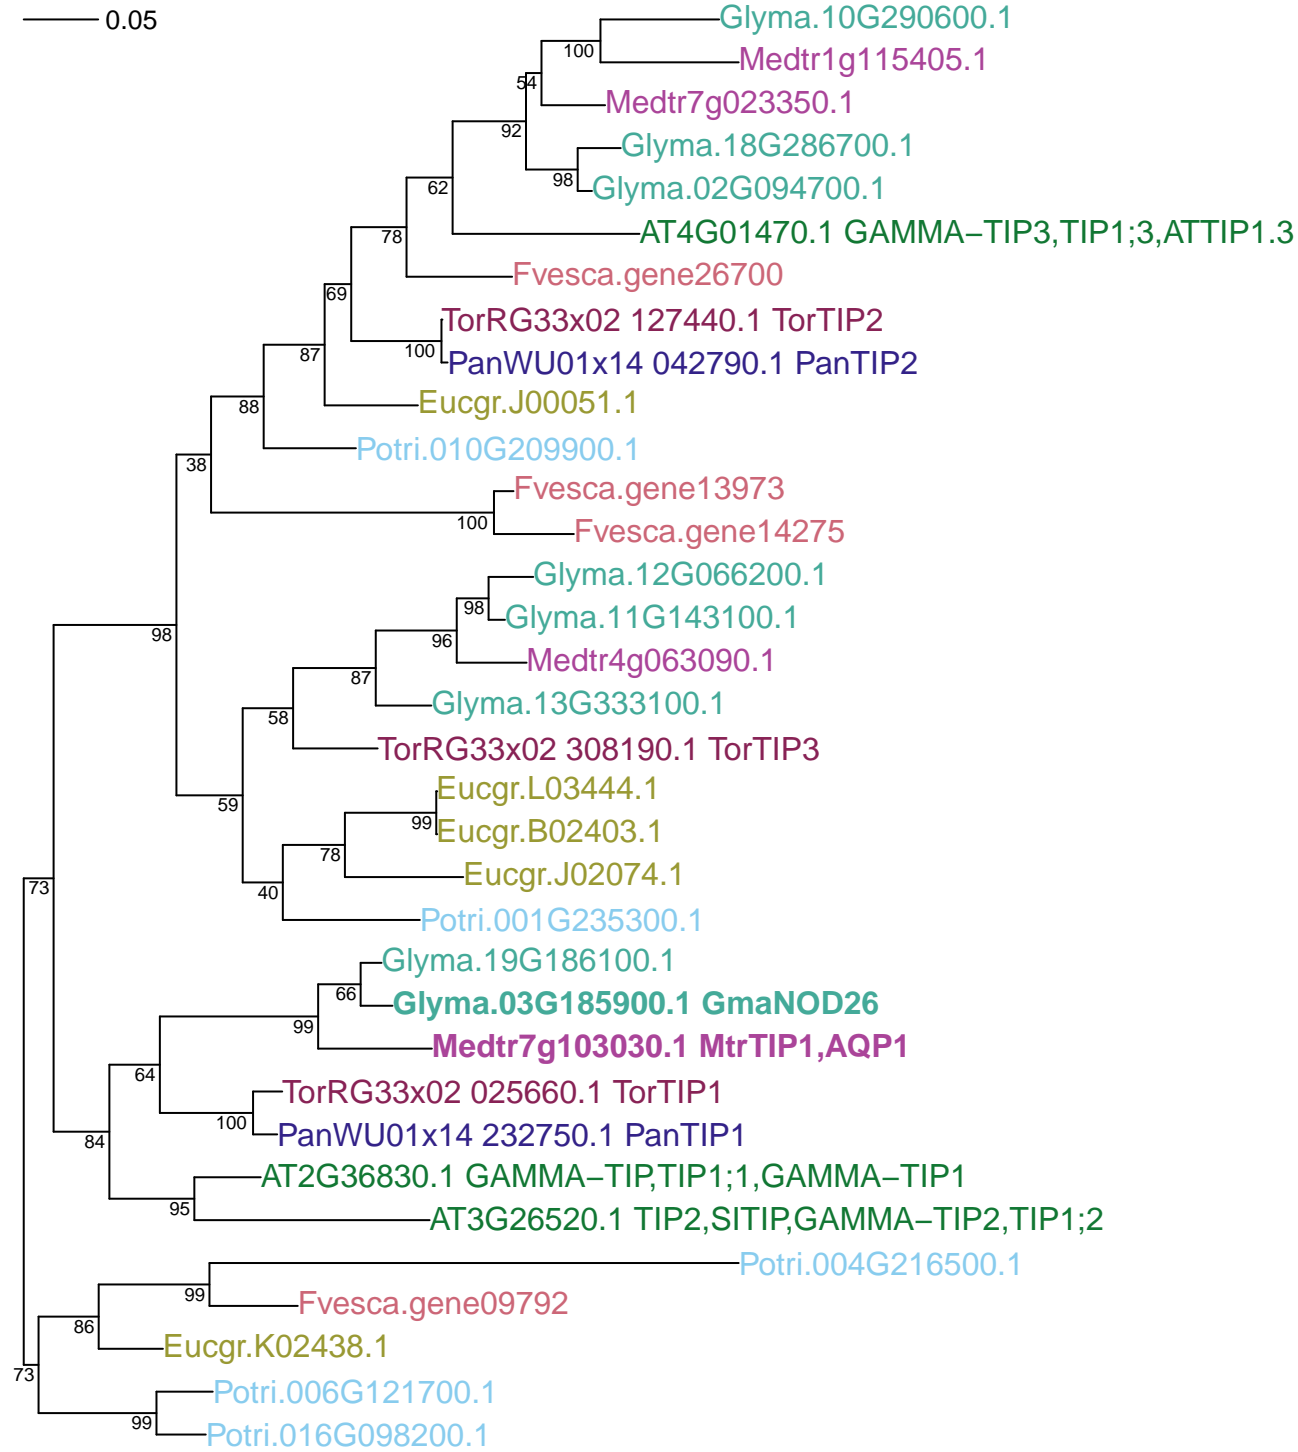

# OG0001473: Transporters. divalent metal transporter

— 0.05

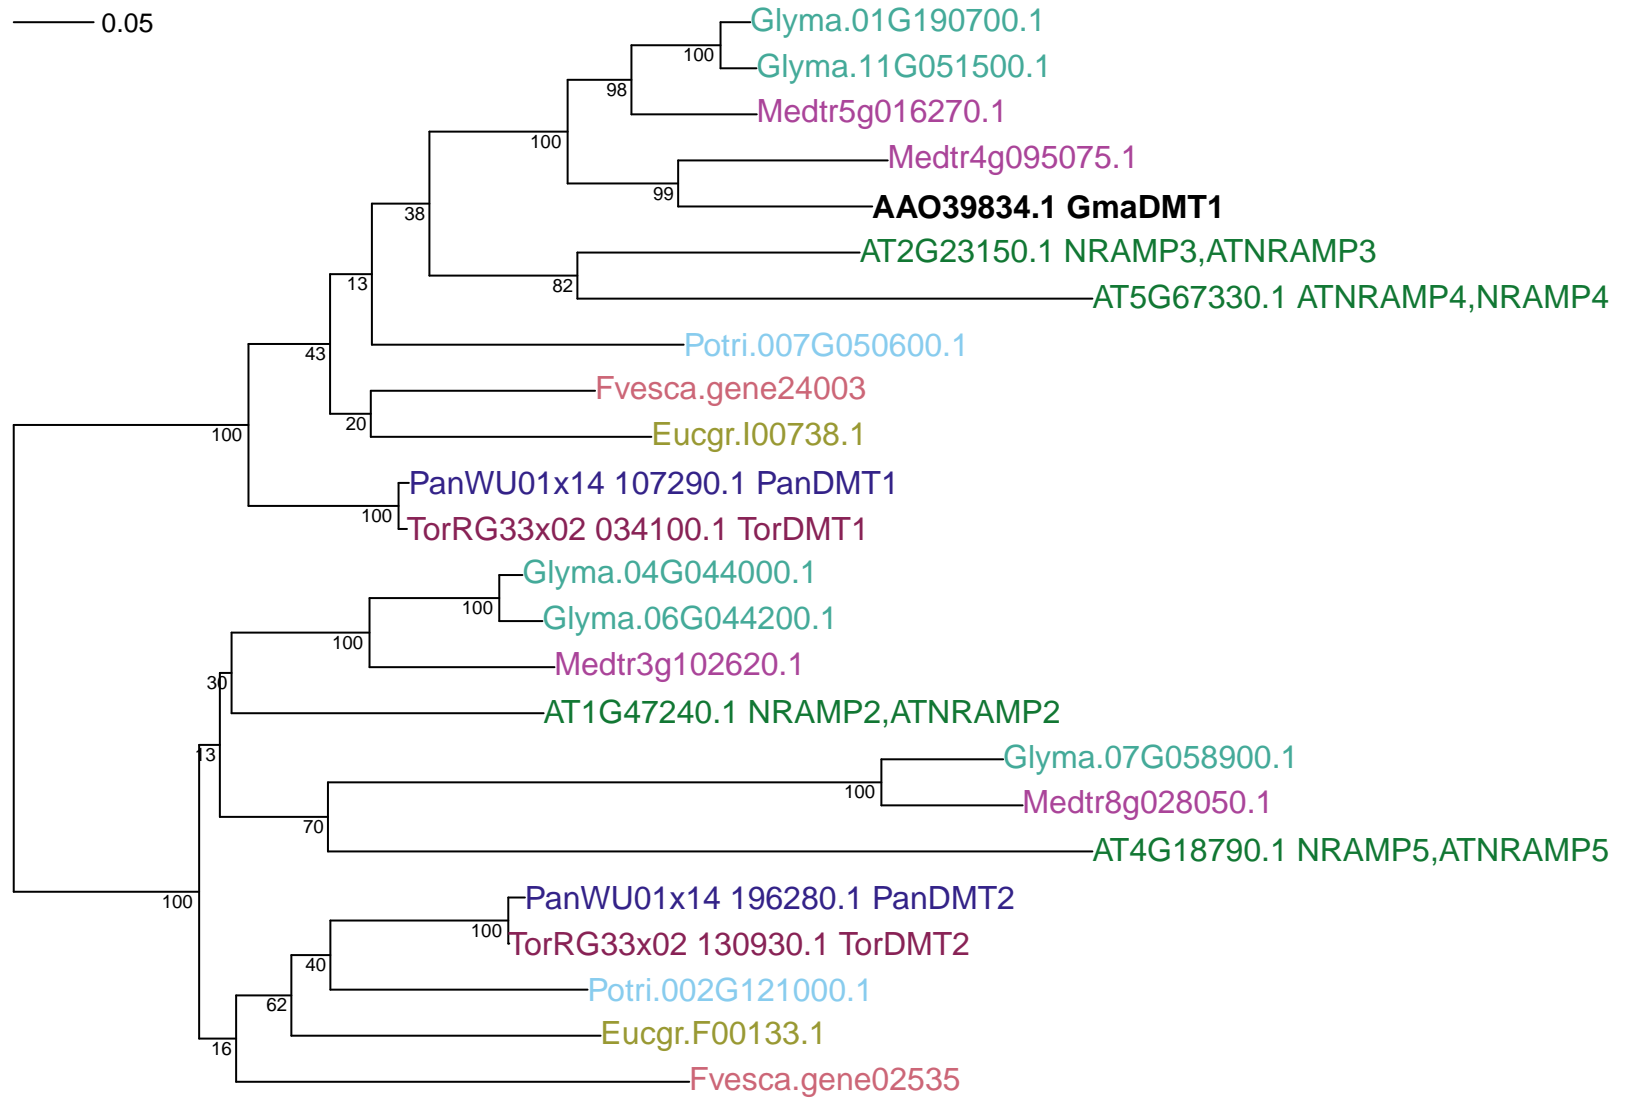

## OG0010523: Transporters. class 1 hemoglobin

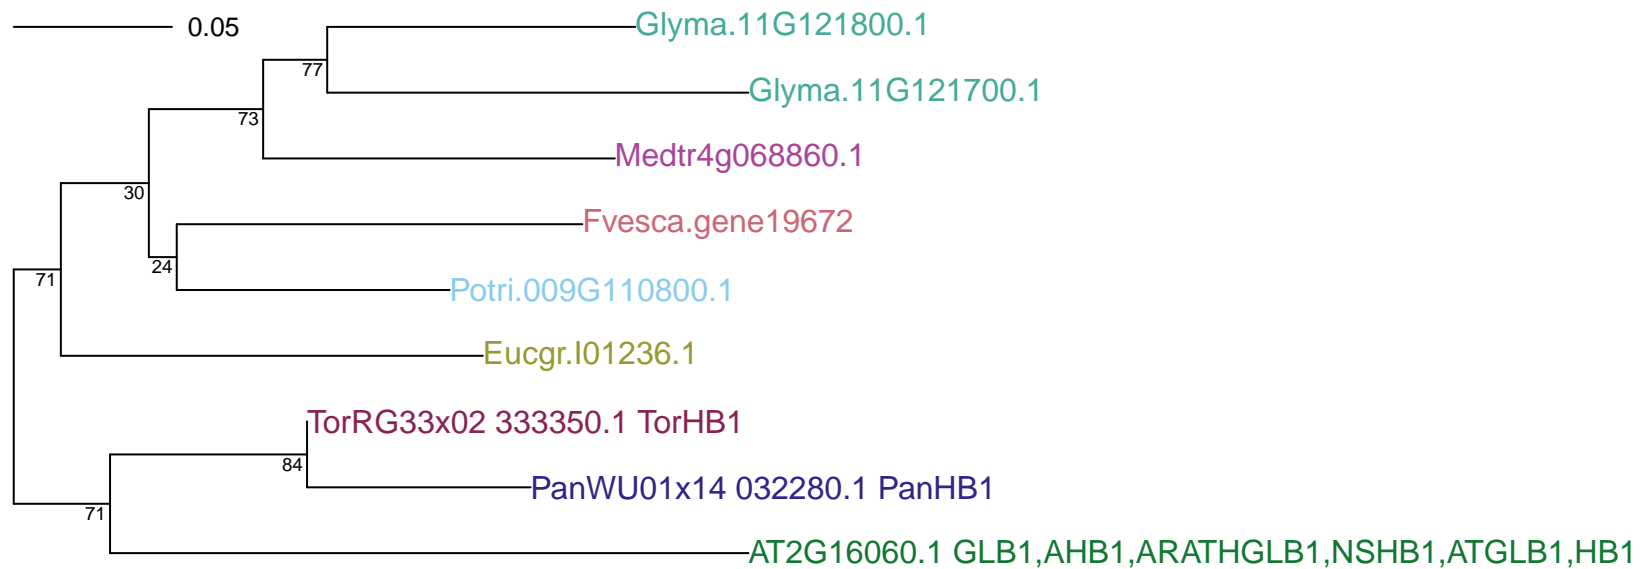

# OG0002188: Transporters. class 2 hemoglobin

—0.05

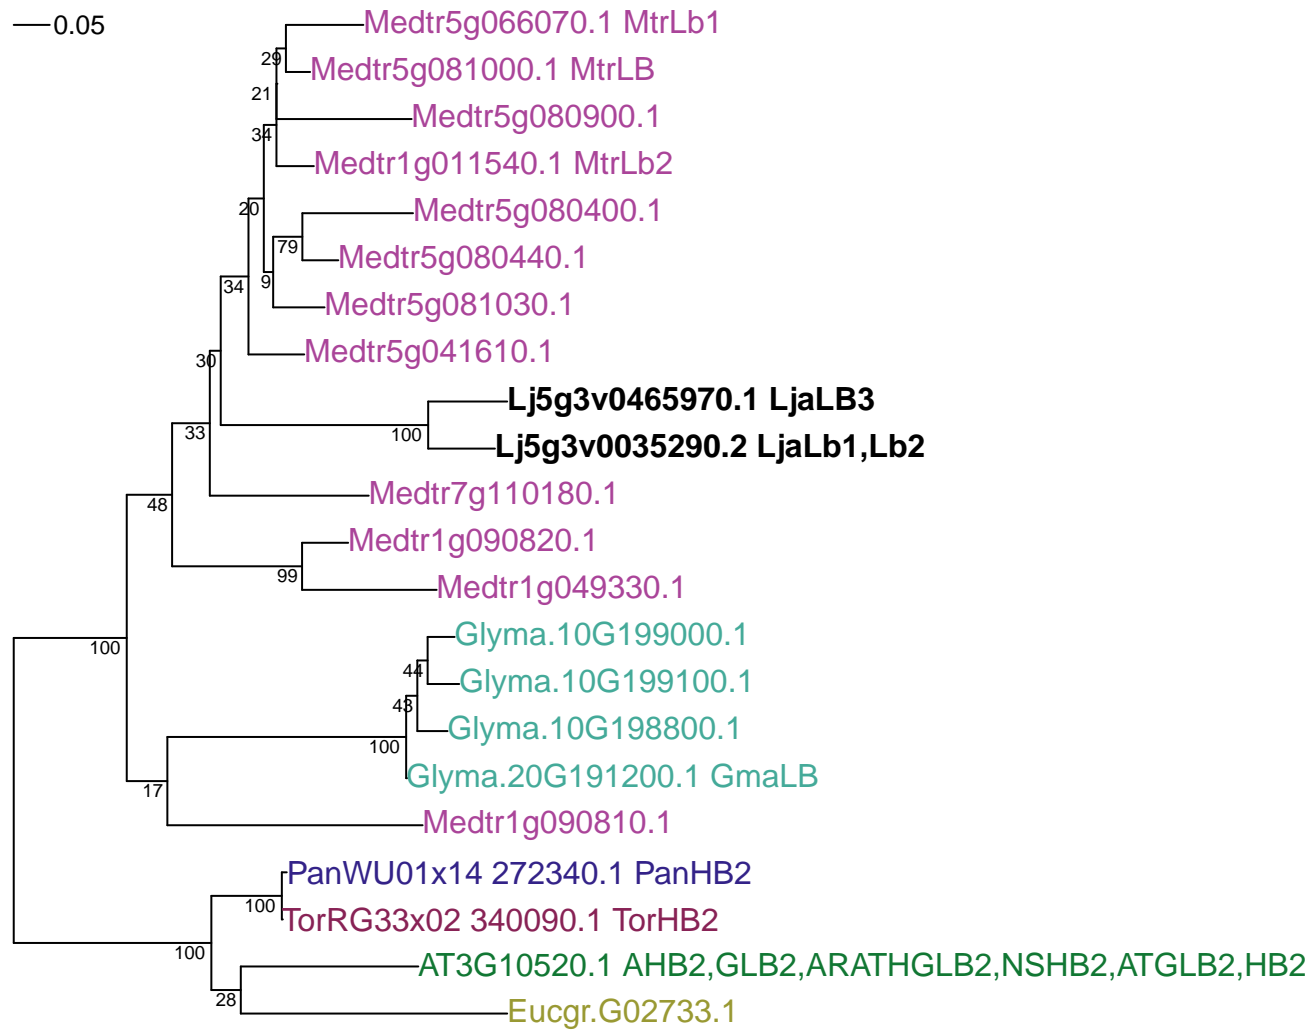

# OG0000938: Transporters. multidrug and toxic compound extrusion protein

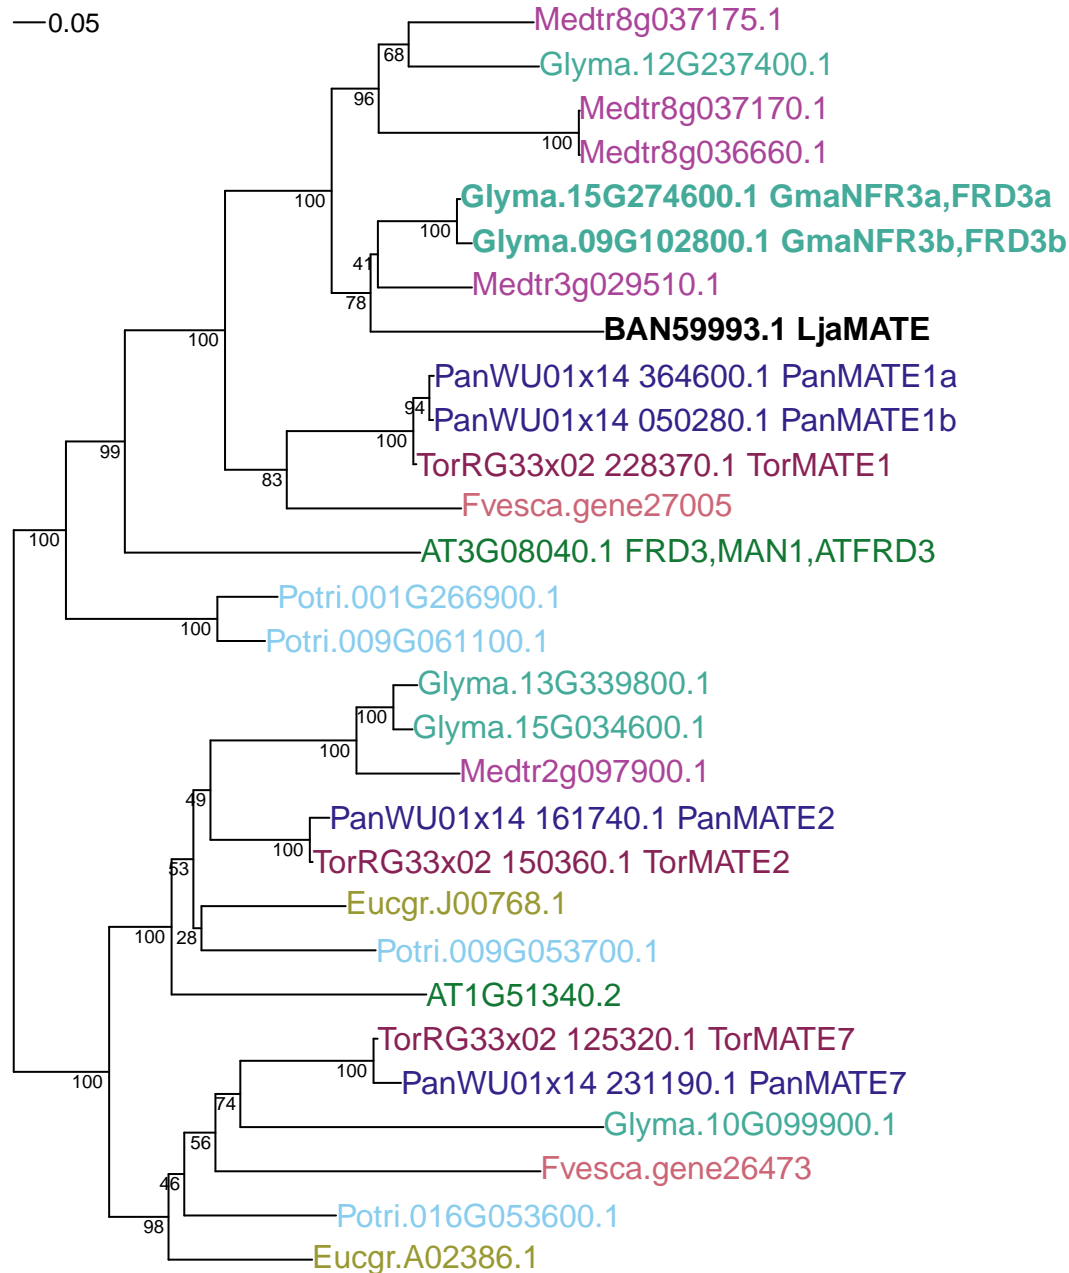



# OG0000599: Transporters. Oligopeptide transporter

— 0.05

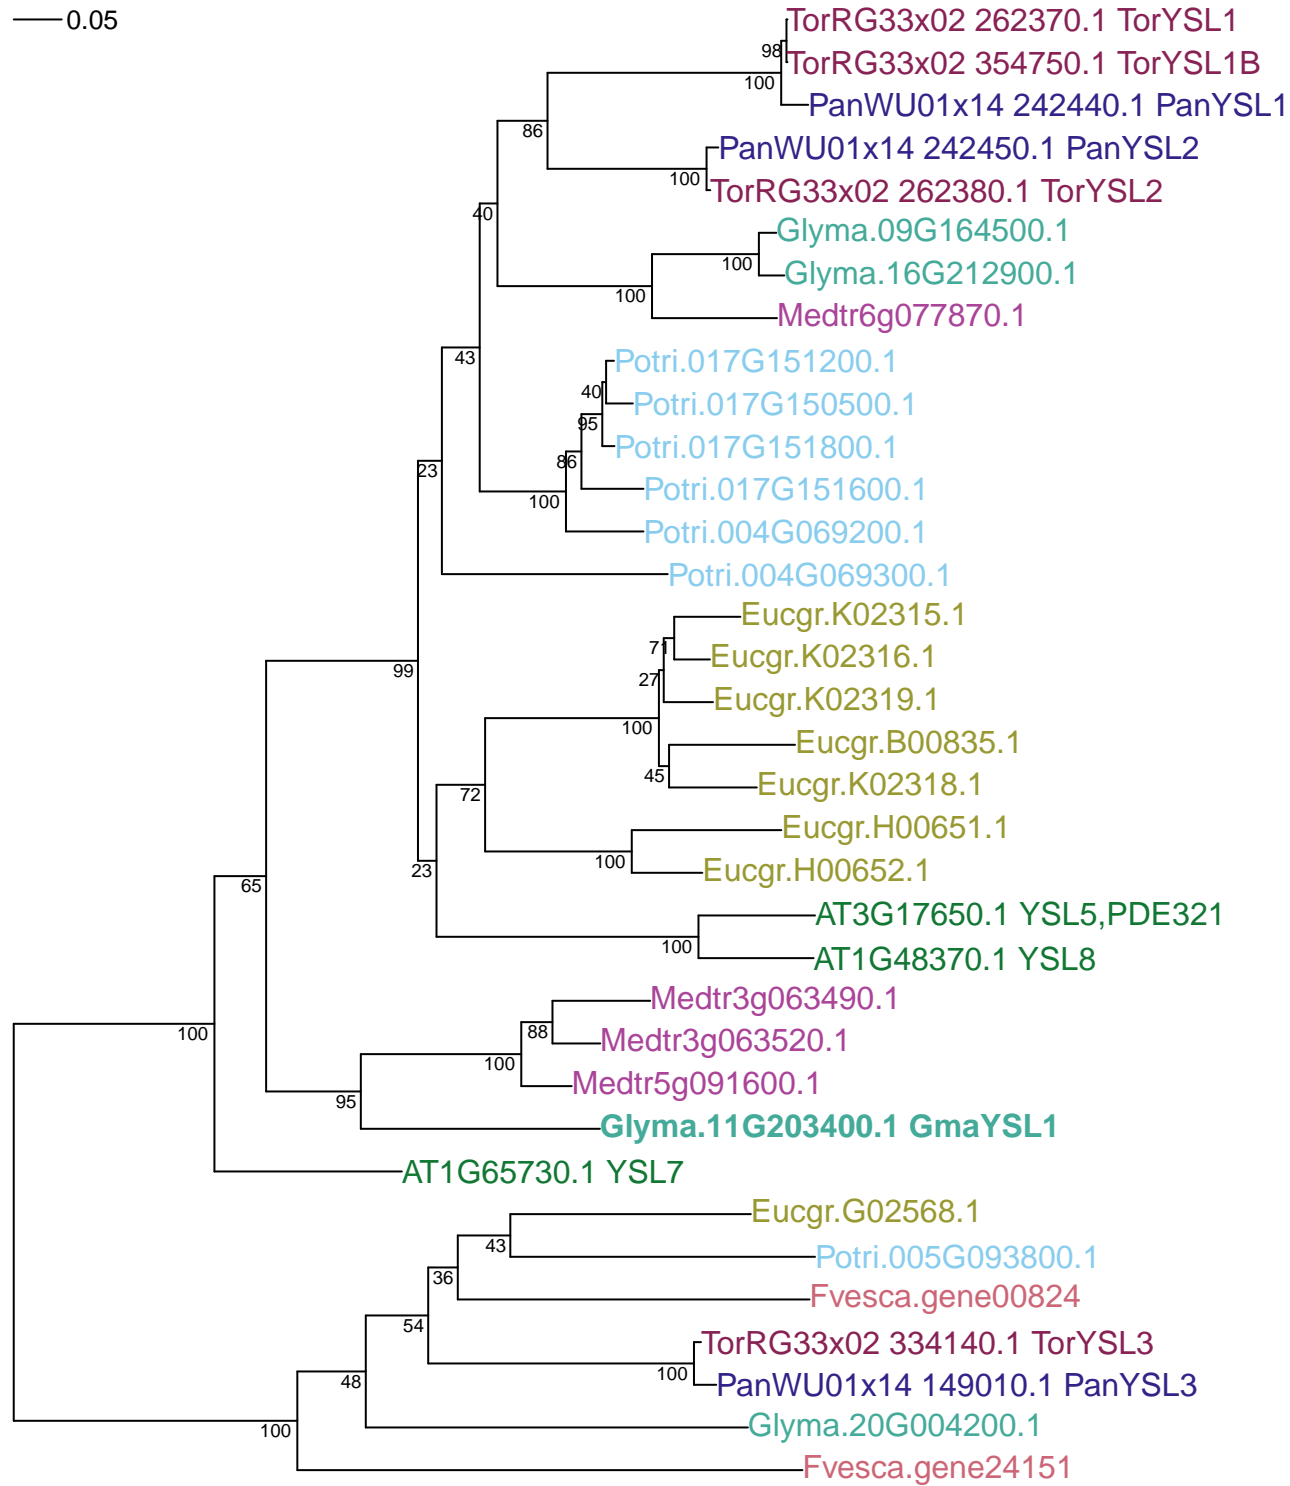

# OG0014077: Transporters. potassium transporter

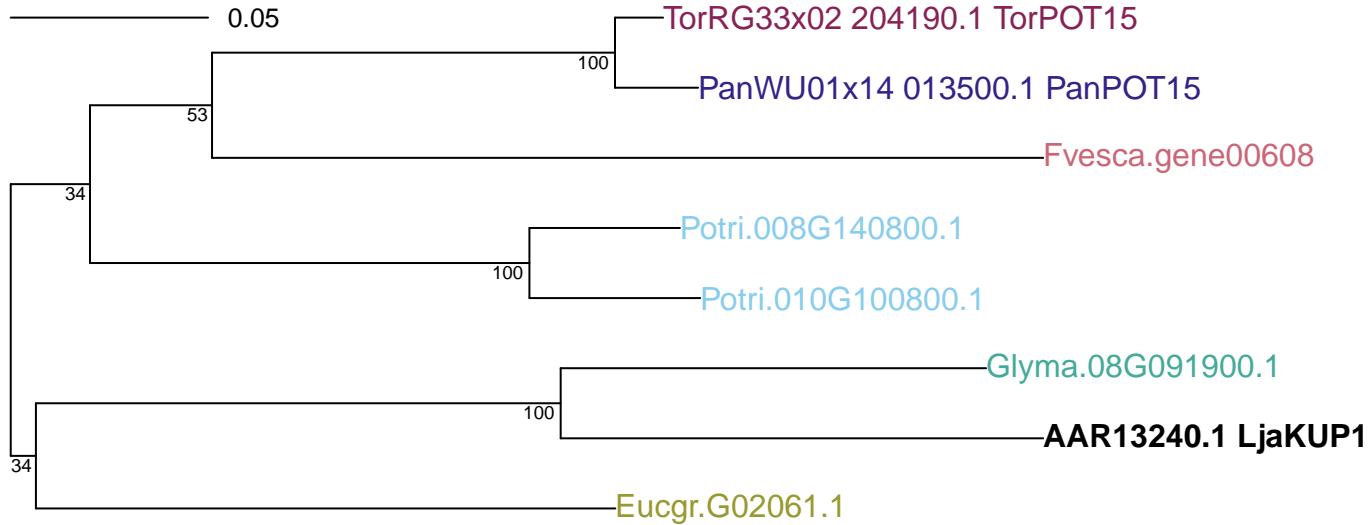

# OG0001109: Transporters. sucrose transporter

— 0.05

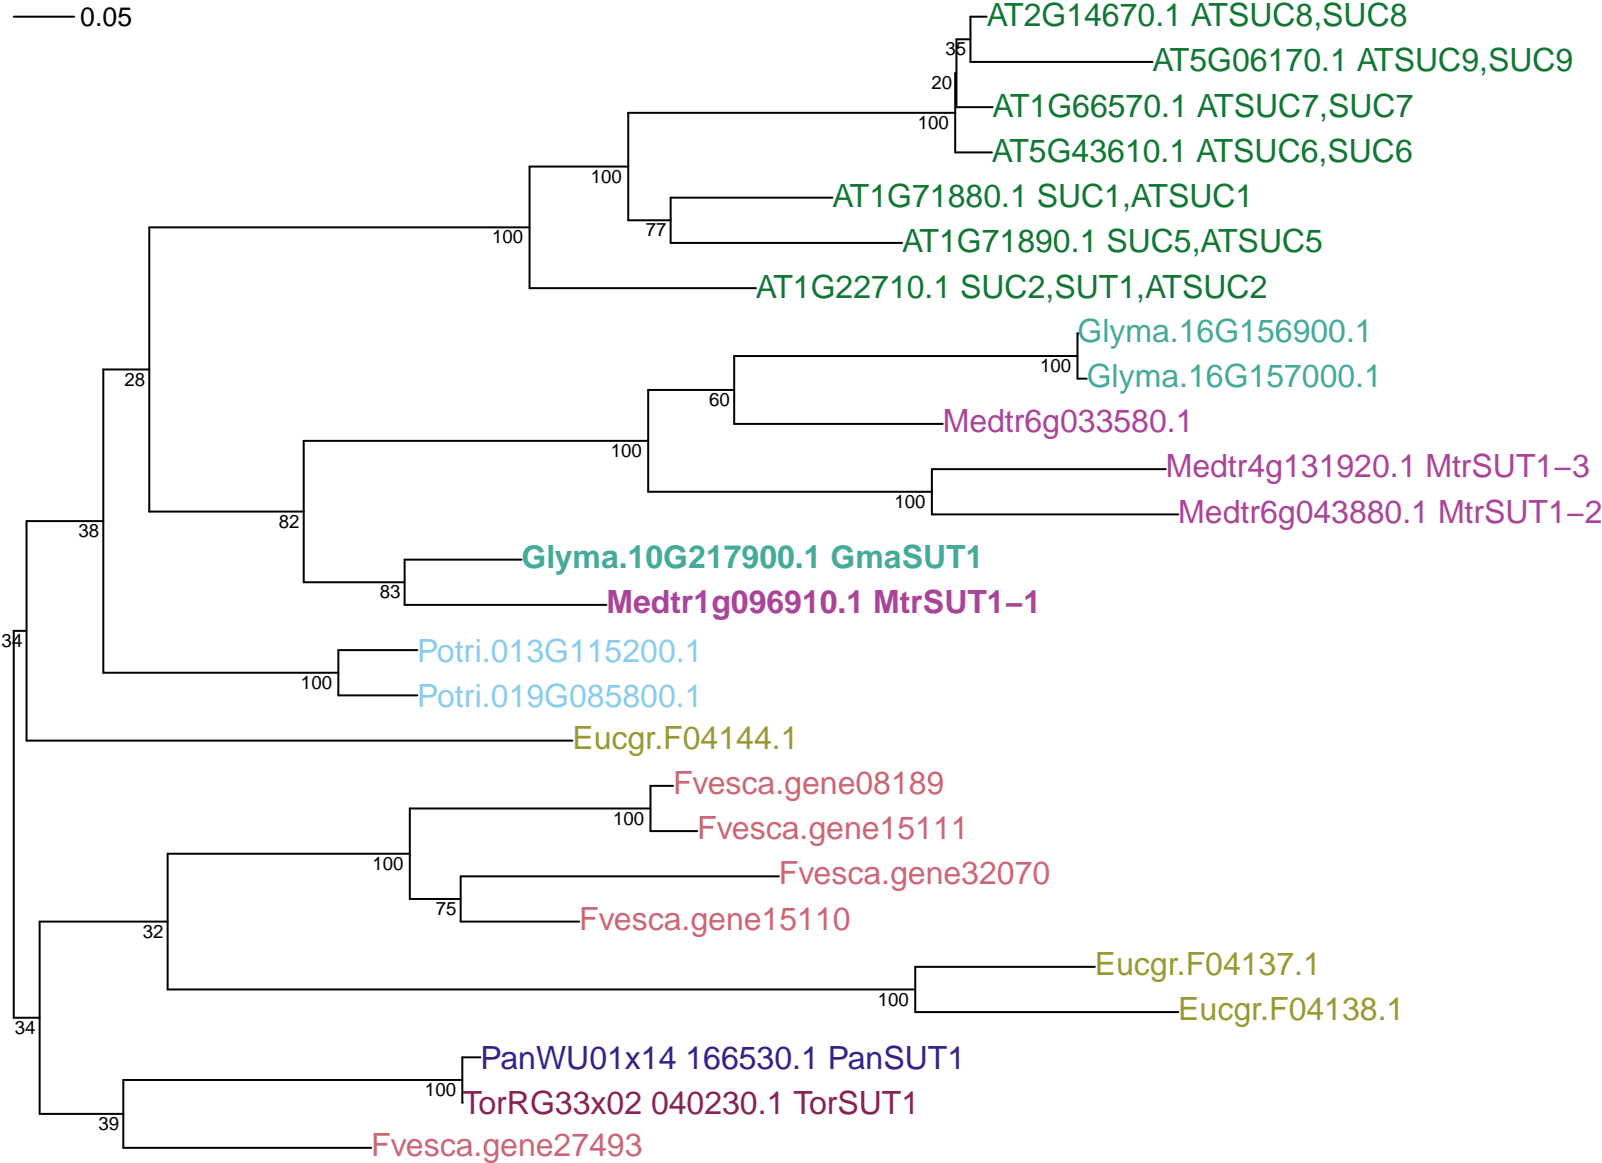

# OG0008004: Transporters. sucrose transporter

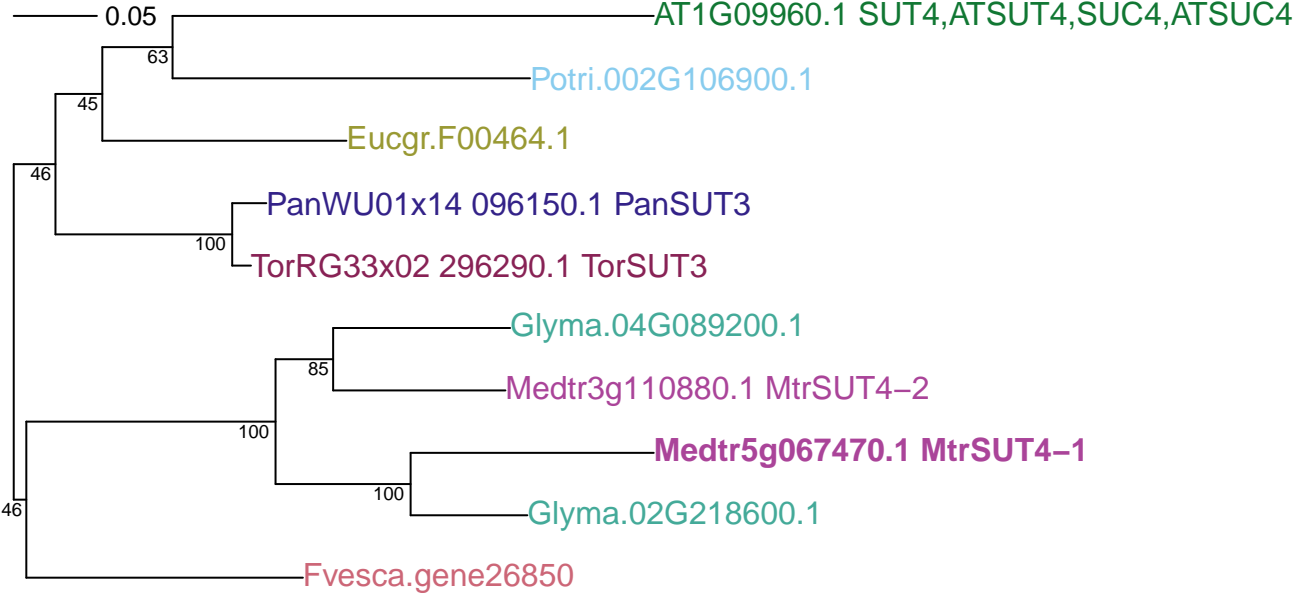



# OG0001069: Transporters. sulfate transporter

— 0.05

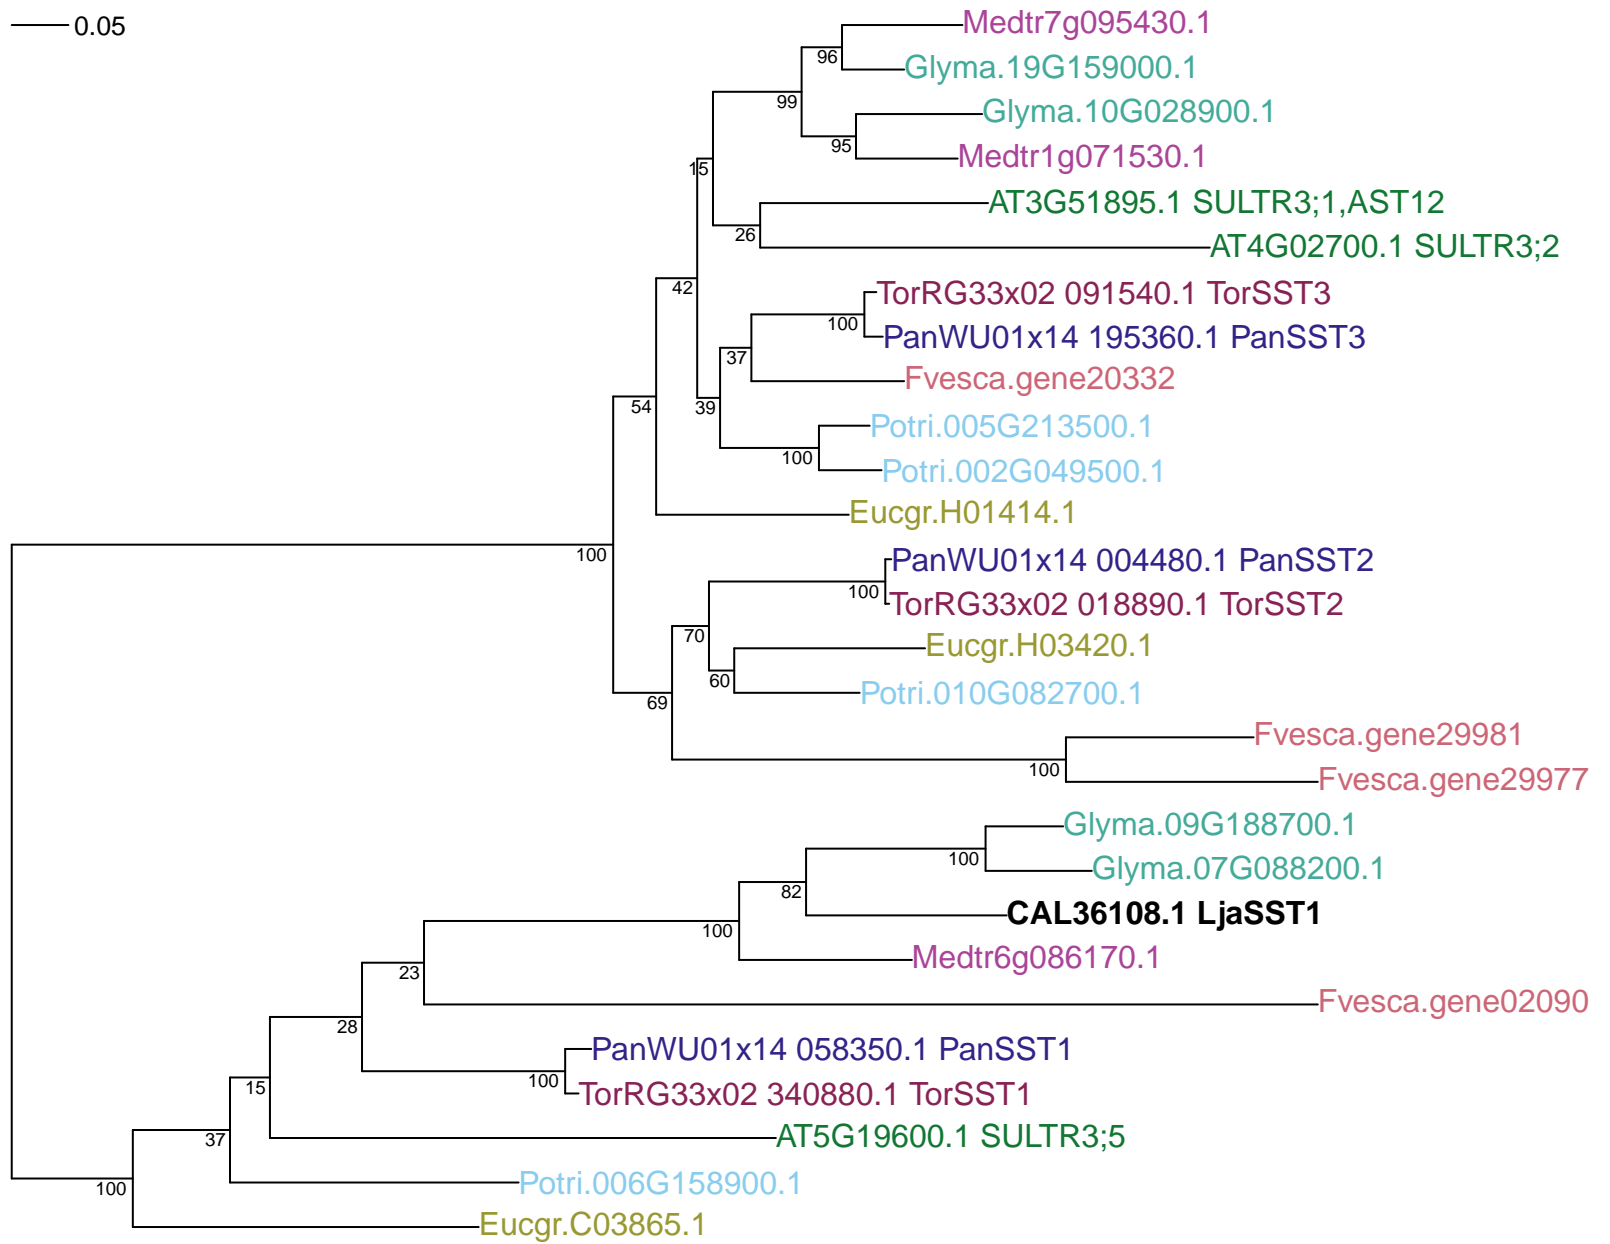

# OG0000681: Transporters. Zinc transporter

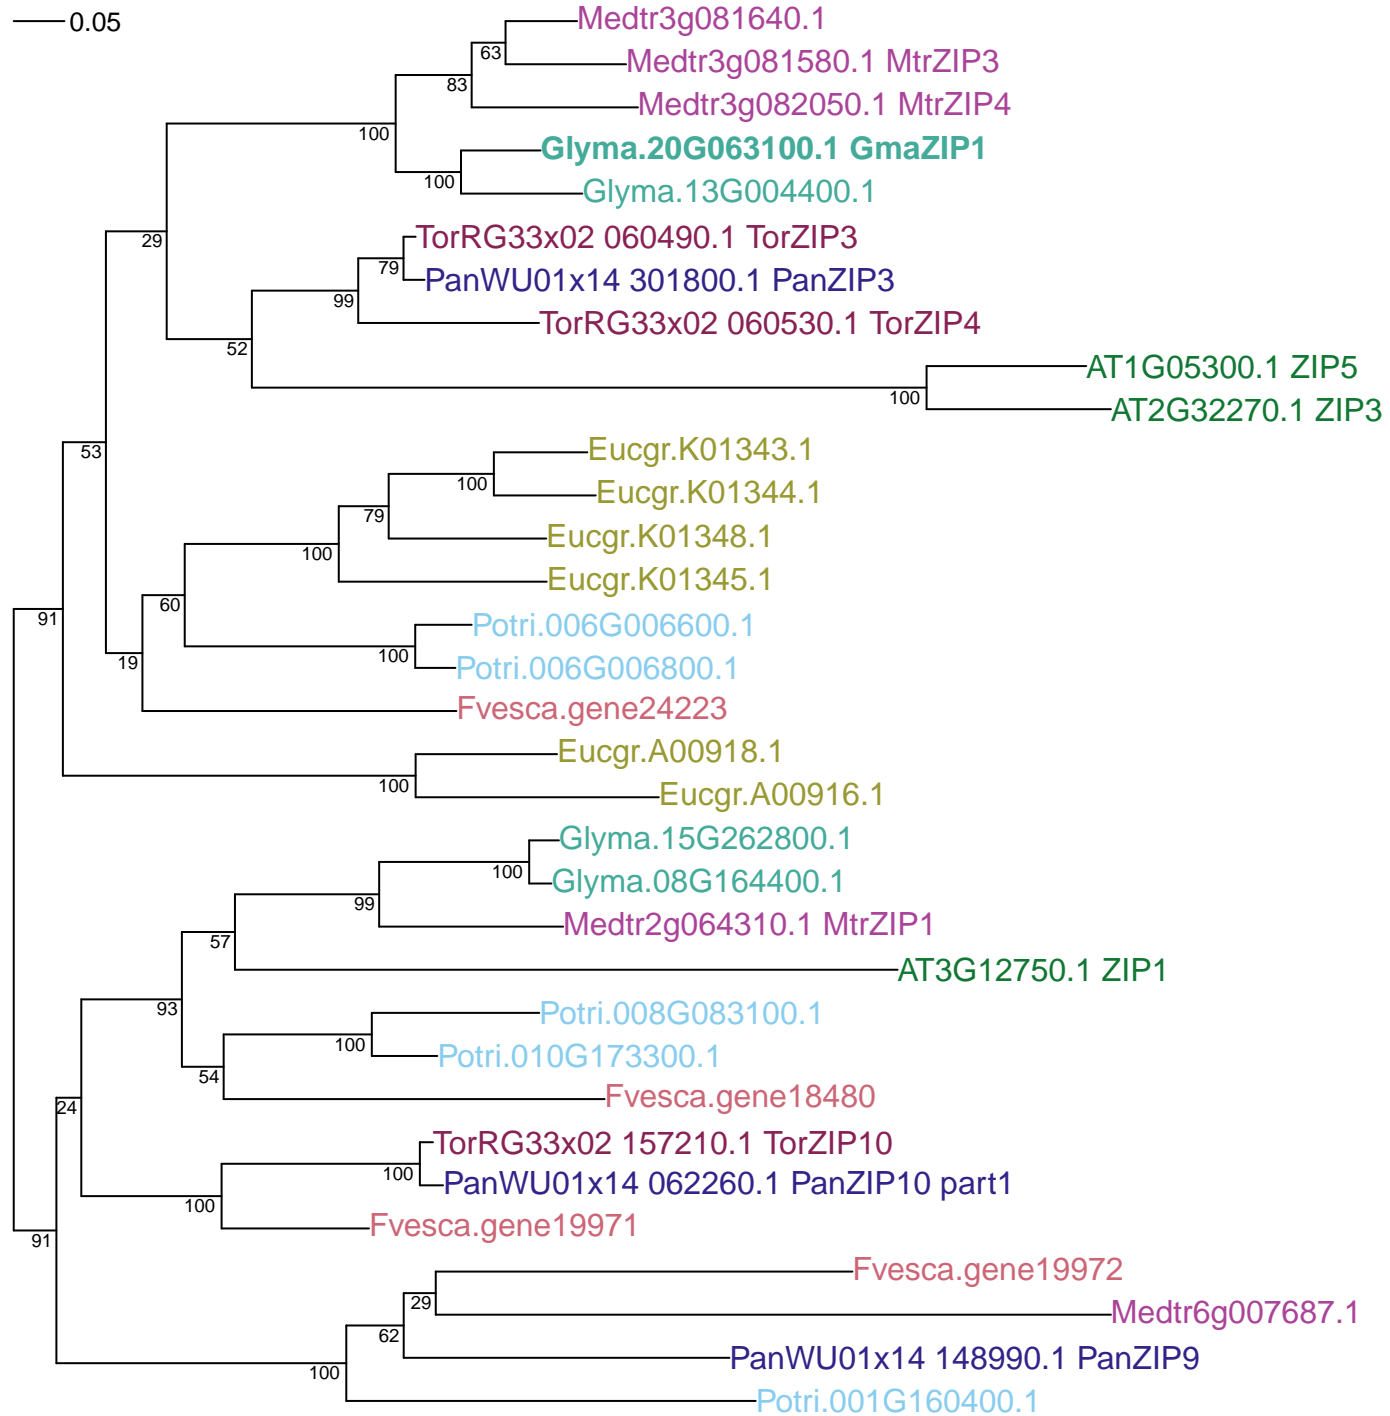

# OG0009828: Enzymes. carbonic anhydrase

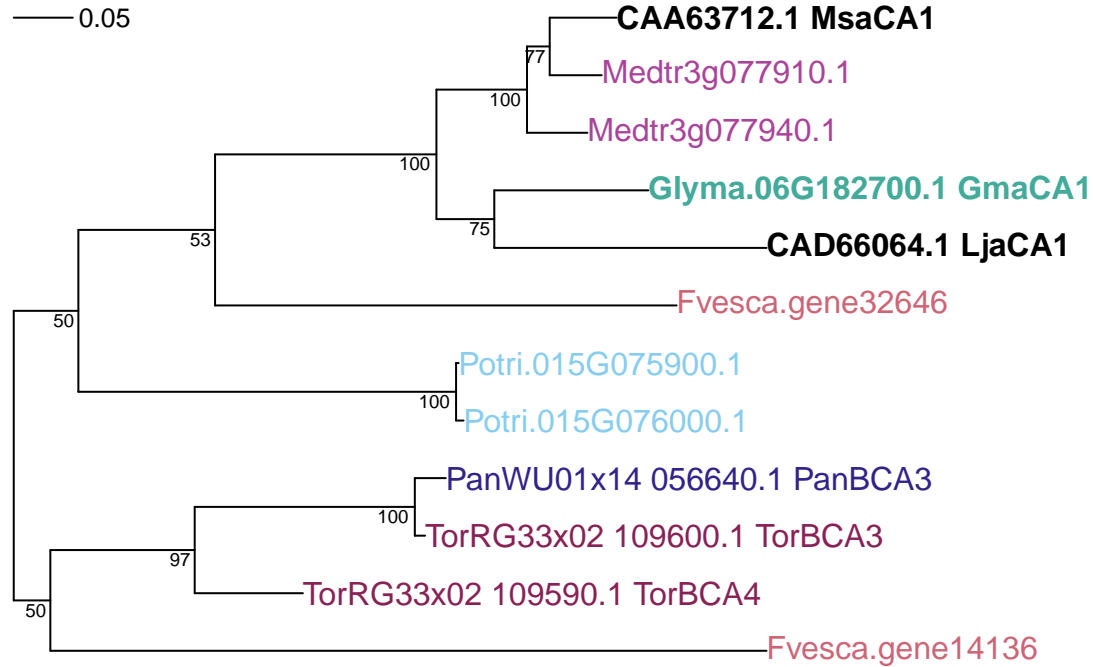



OG0000092: Enzymes. cysteine protease

— 0.05

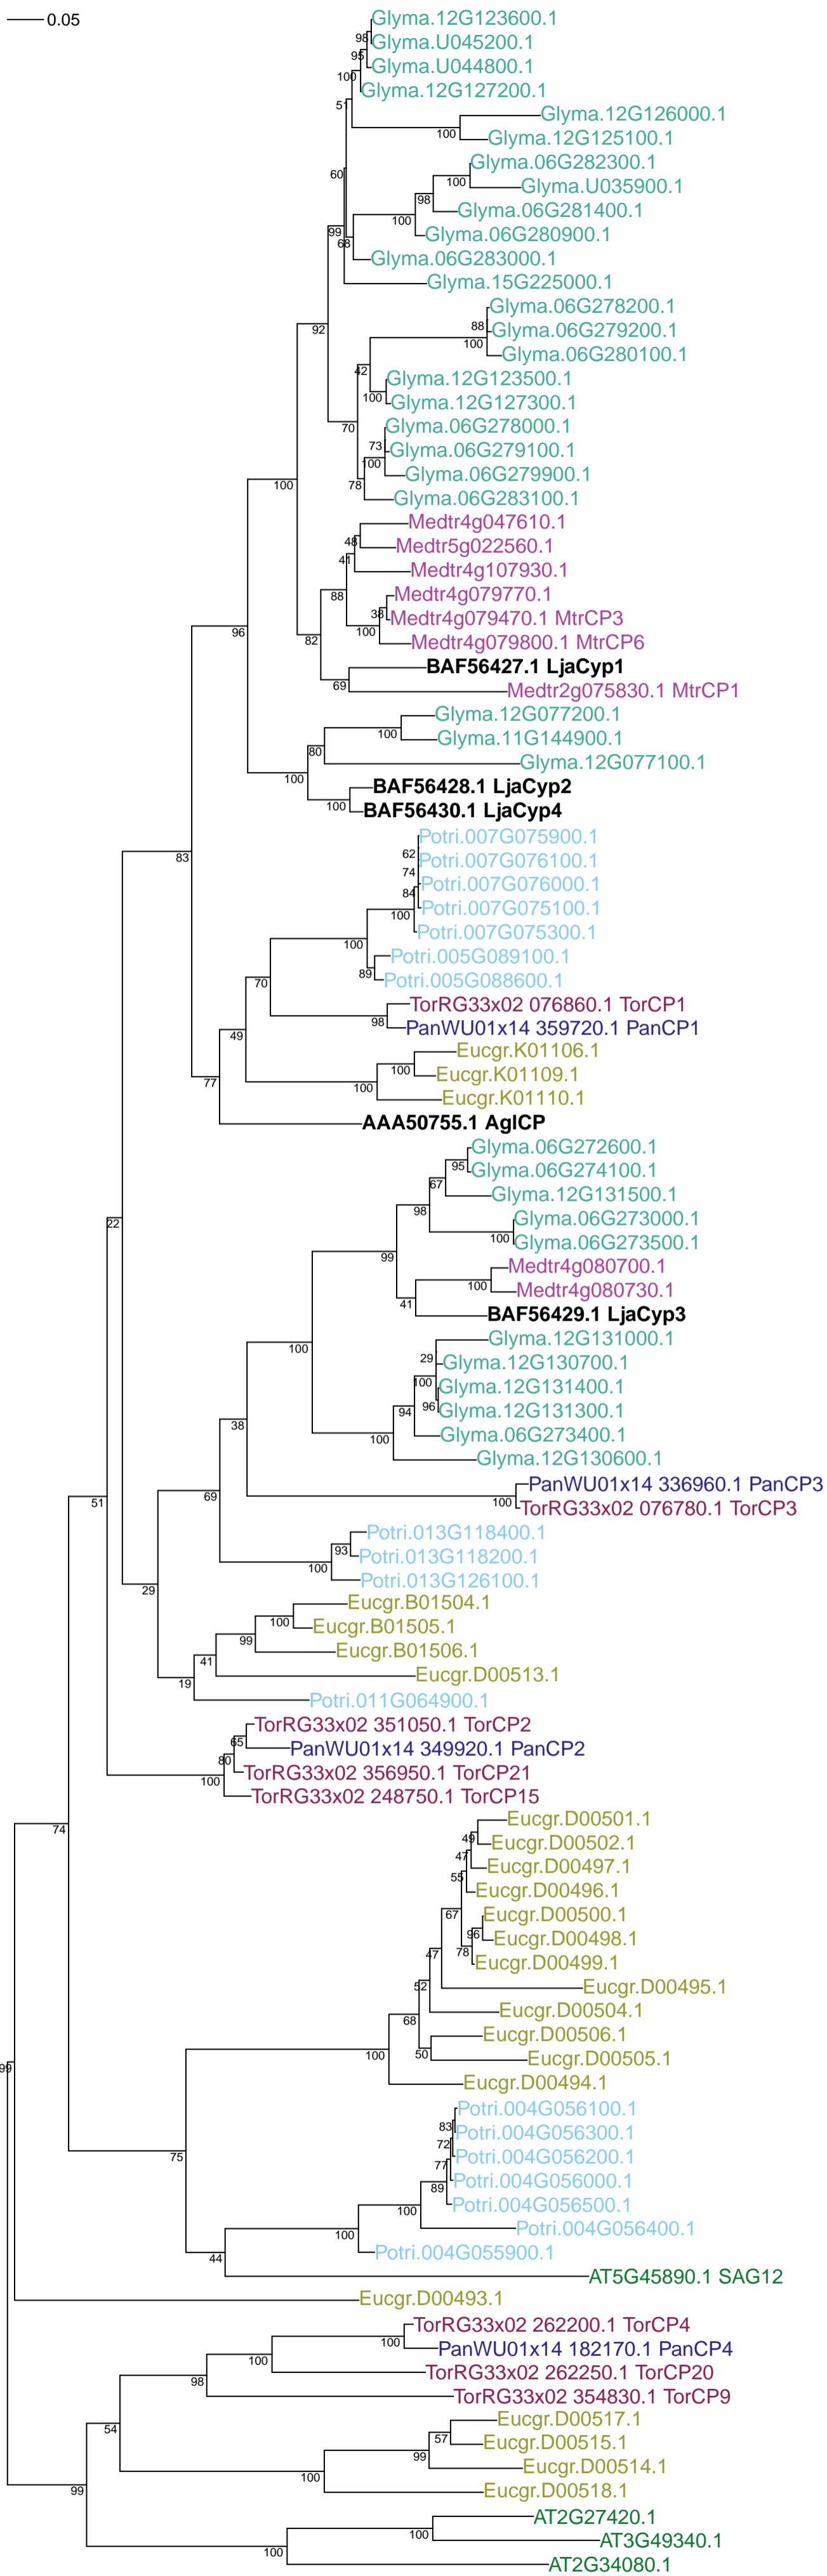

# OG0001704: Enzymes. cysteine protease

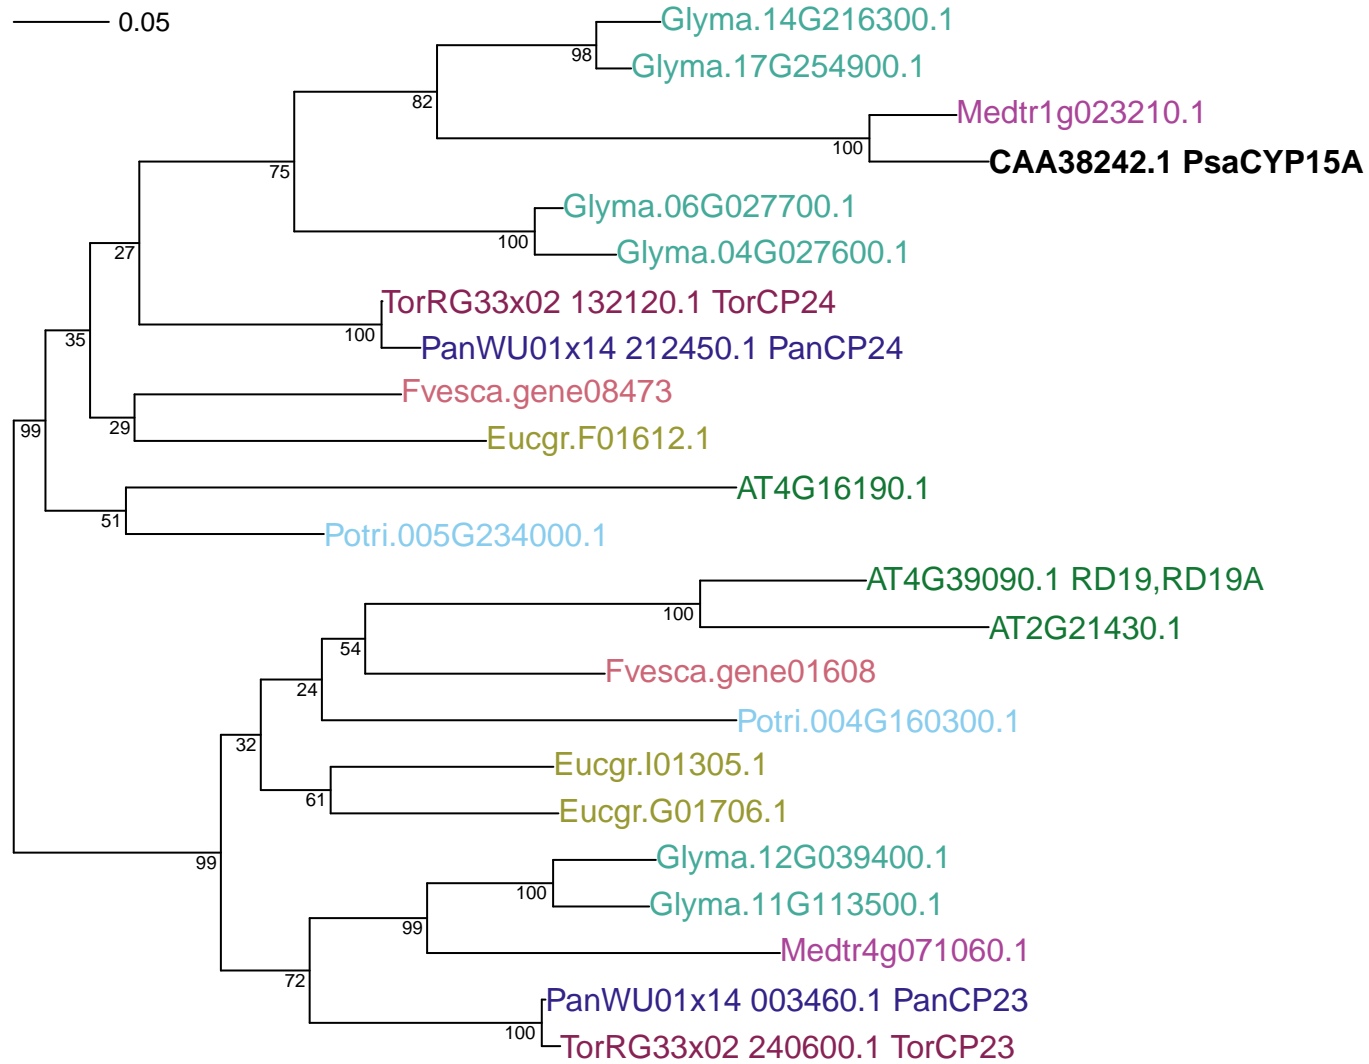

# OG0011624: Enzymes. glutamate synthase

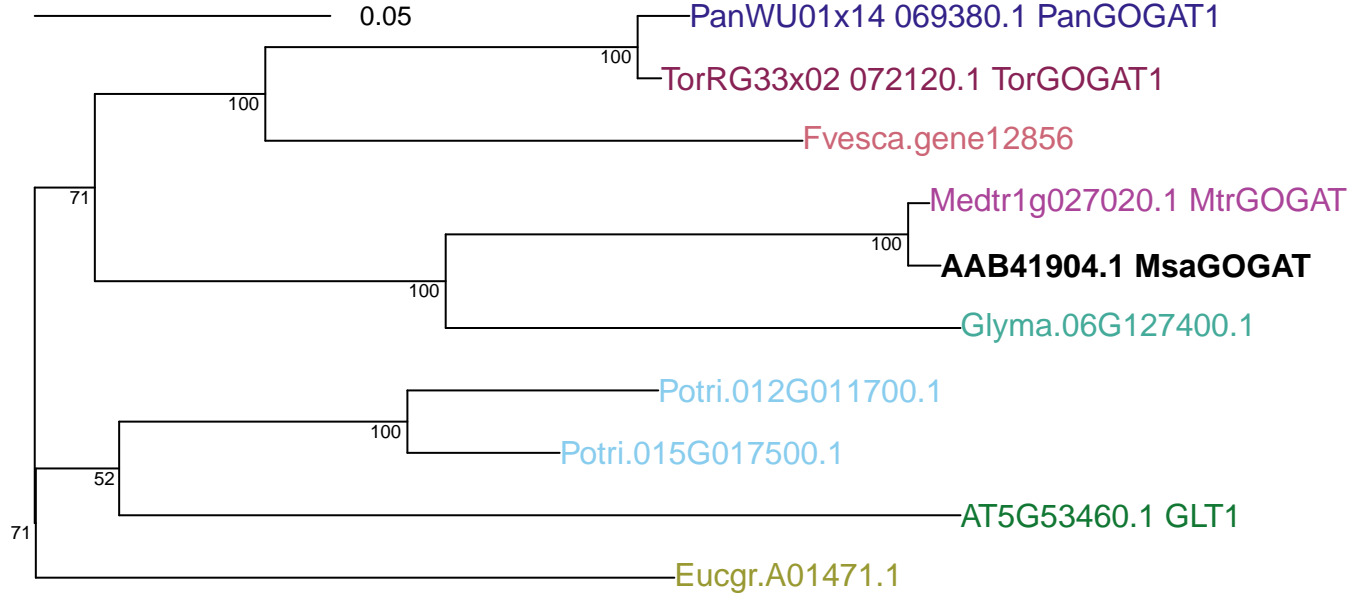

# OG0006224: Enzymes. glutamine synthetase

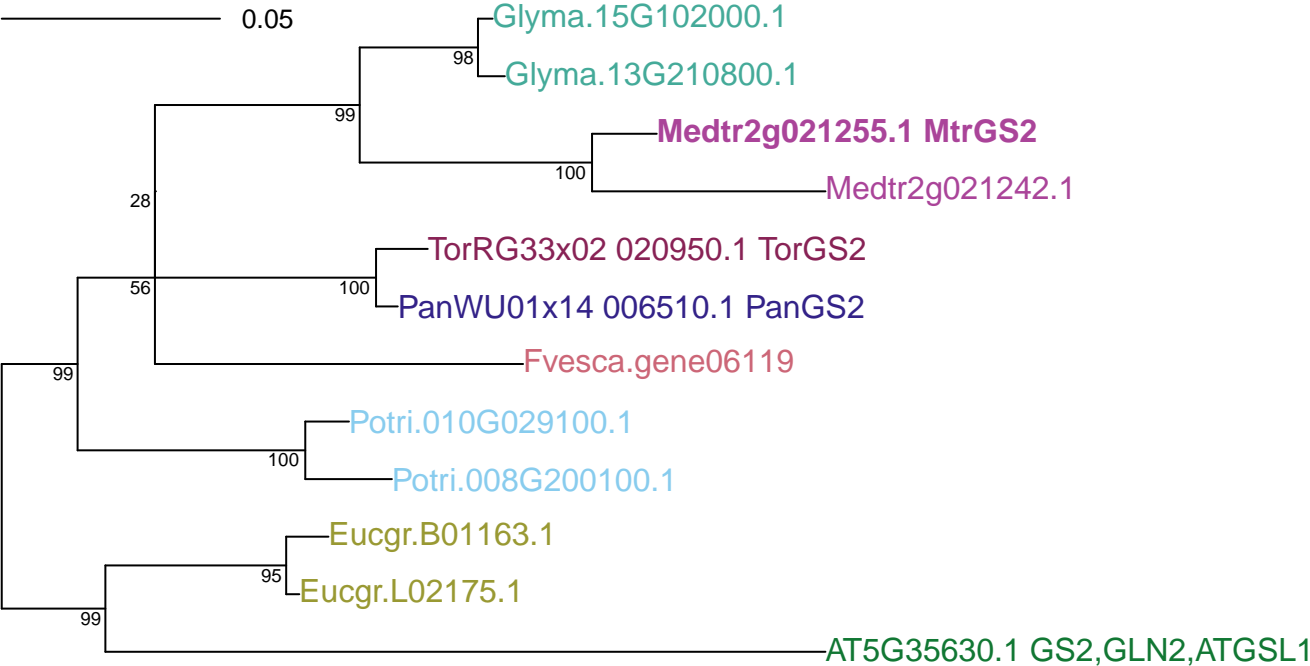

# OG0000690: Enzymes. glutamine synthetase

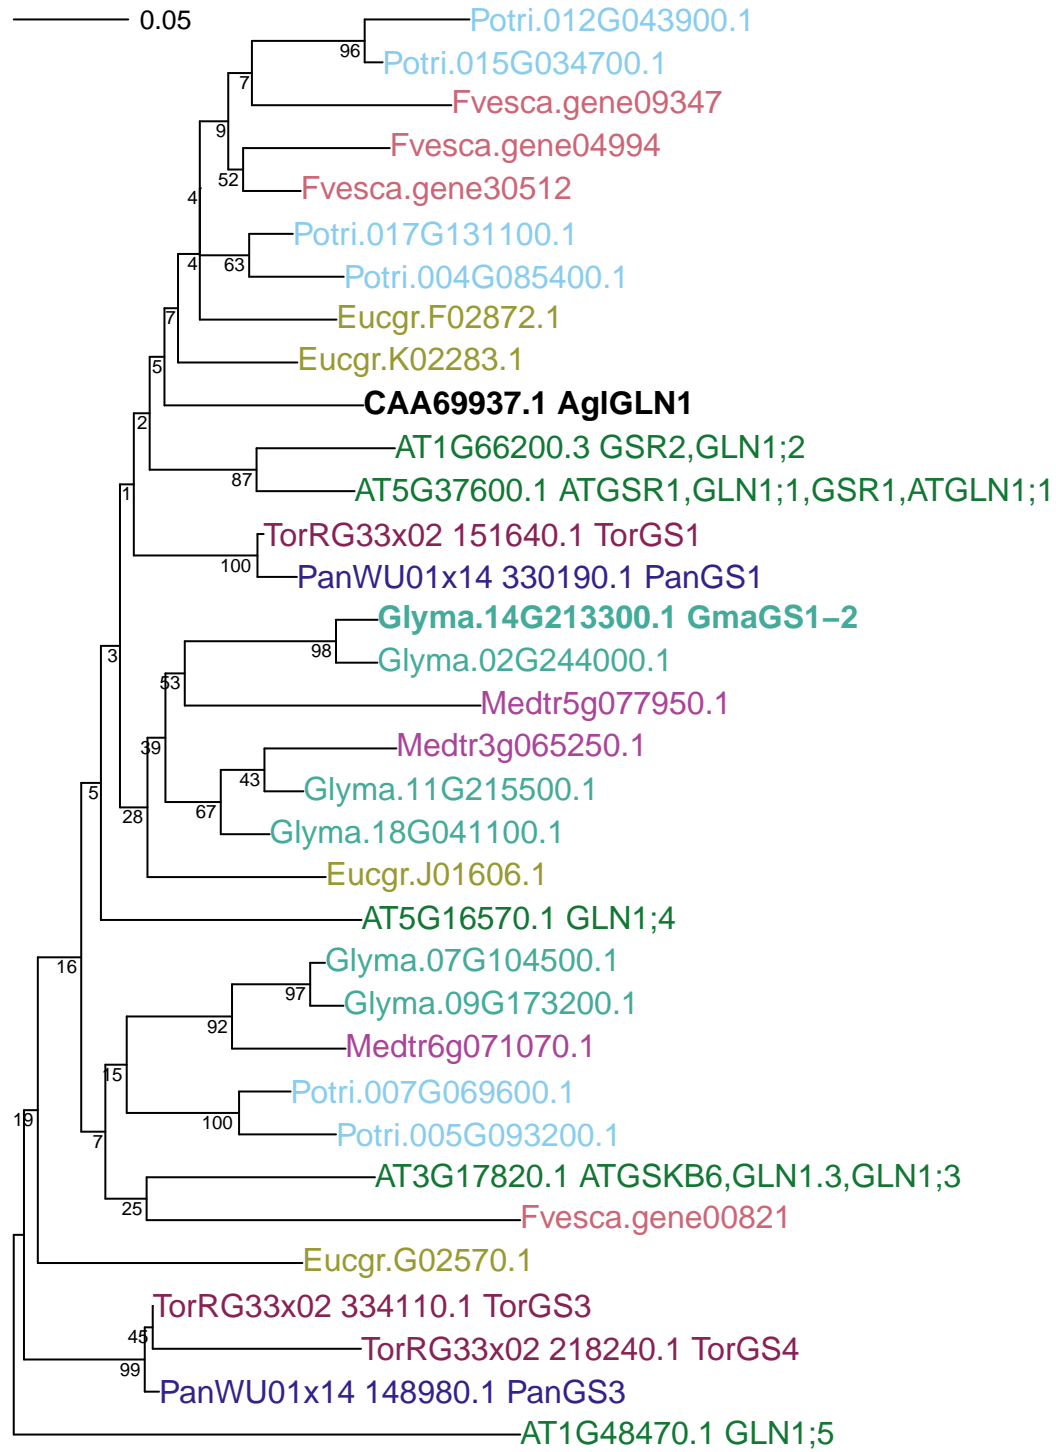

# OG0012294: Enzymes. glycinamide ribonucleotide synthetase

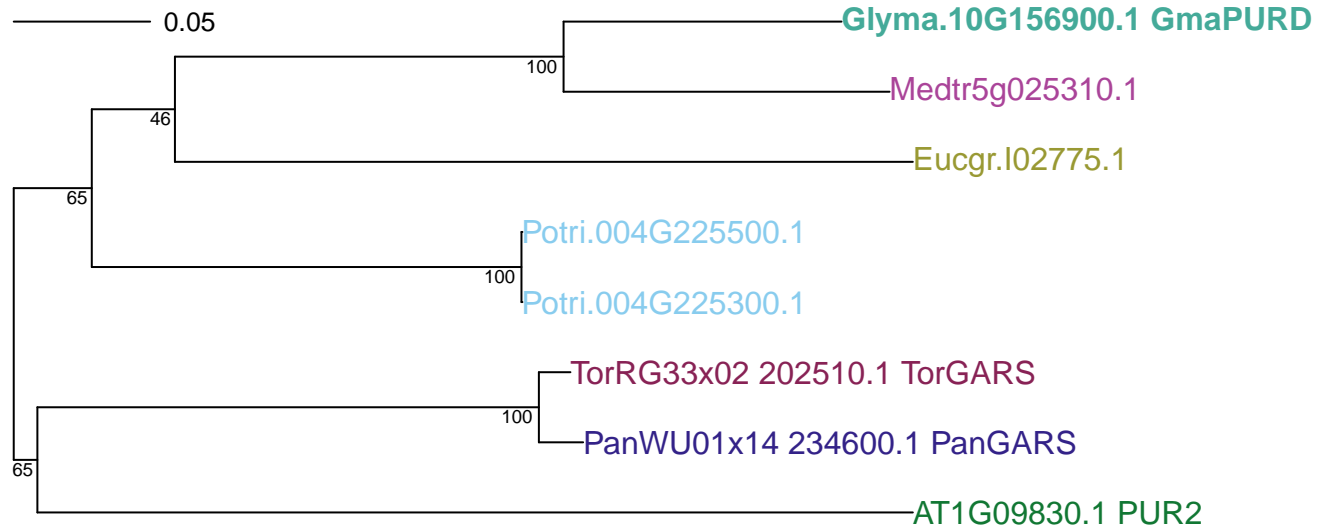

# OG0005486: Enzymes. glycinamide ribonucleotide transformylase

— 0.05

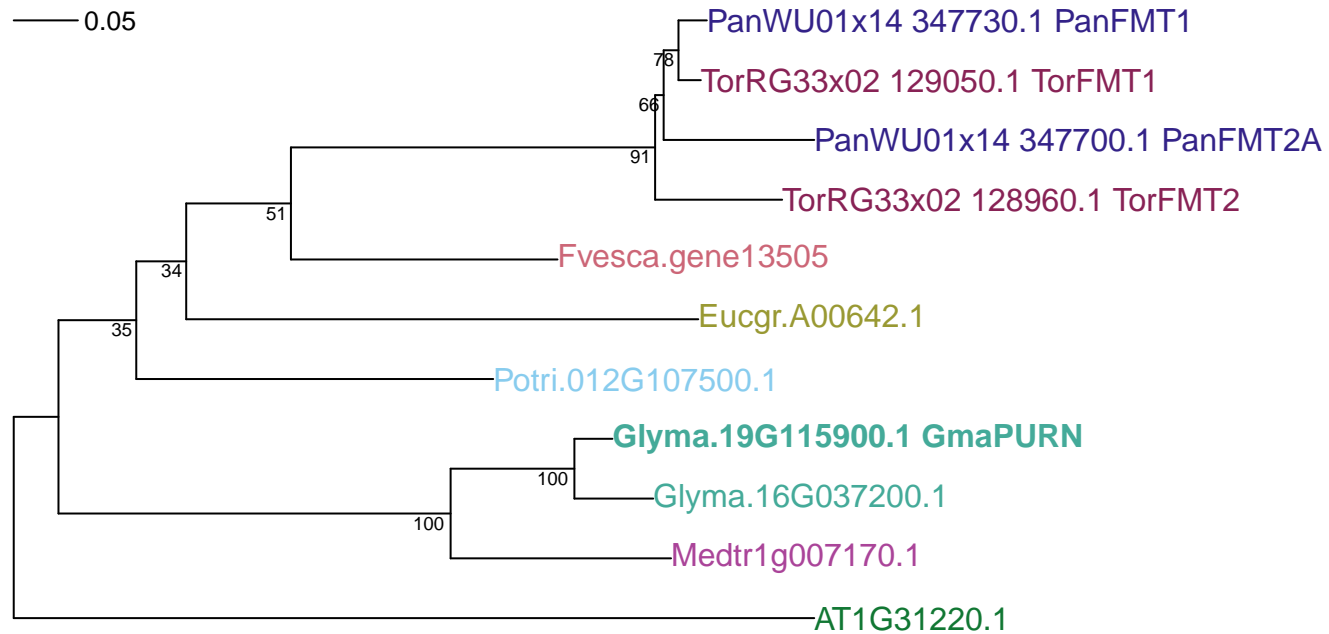

# OG0003526: Enzymes. homocitrate synthase

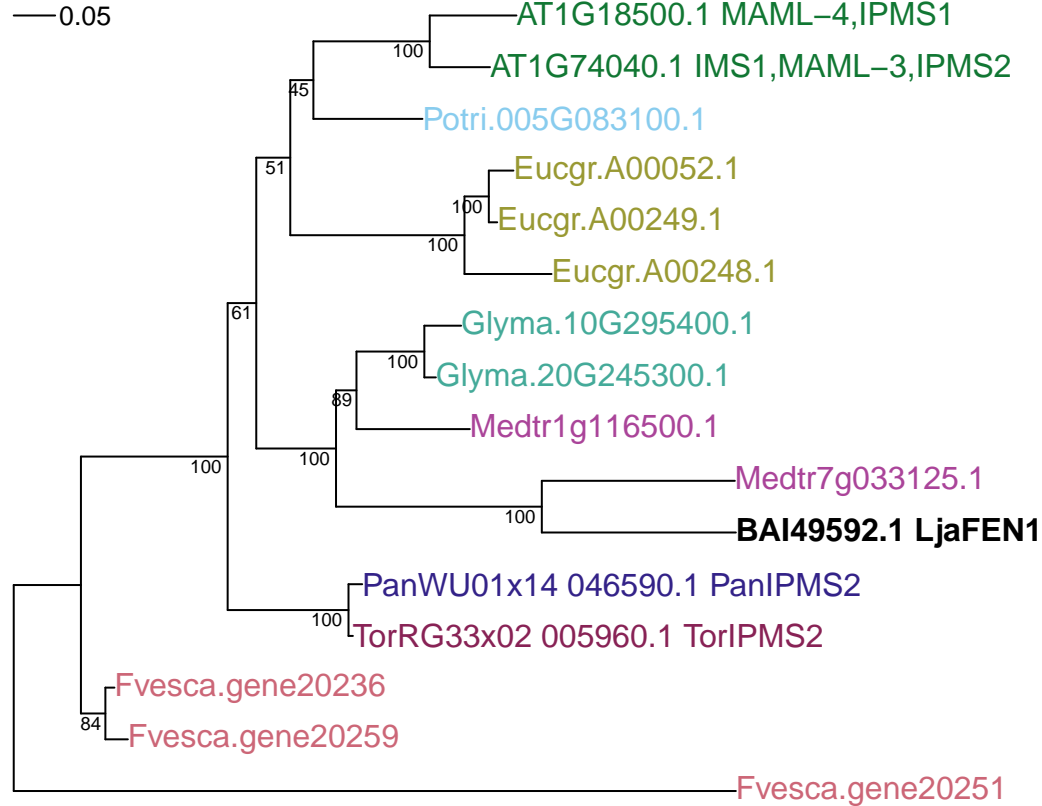



# OG0007185: Enzymes. NADH-malate dehydrogenase

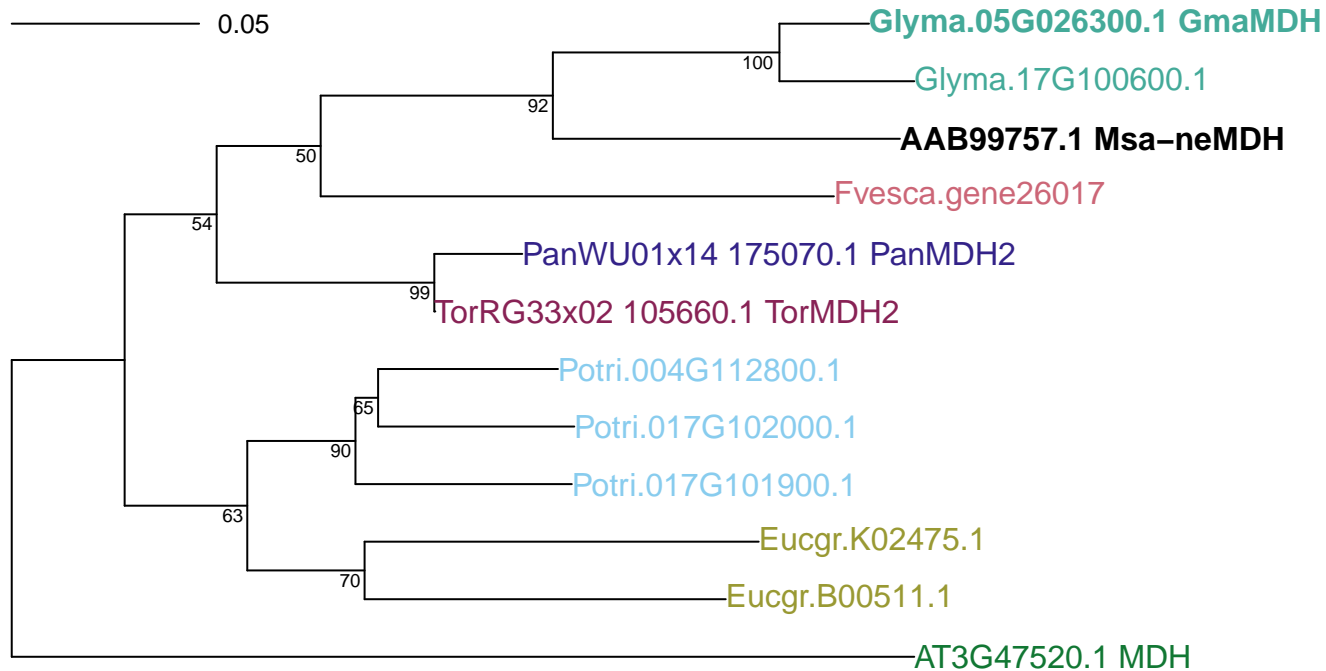

# OG0000602: Enzymes. NADPH oxidase

— 0.05

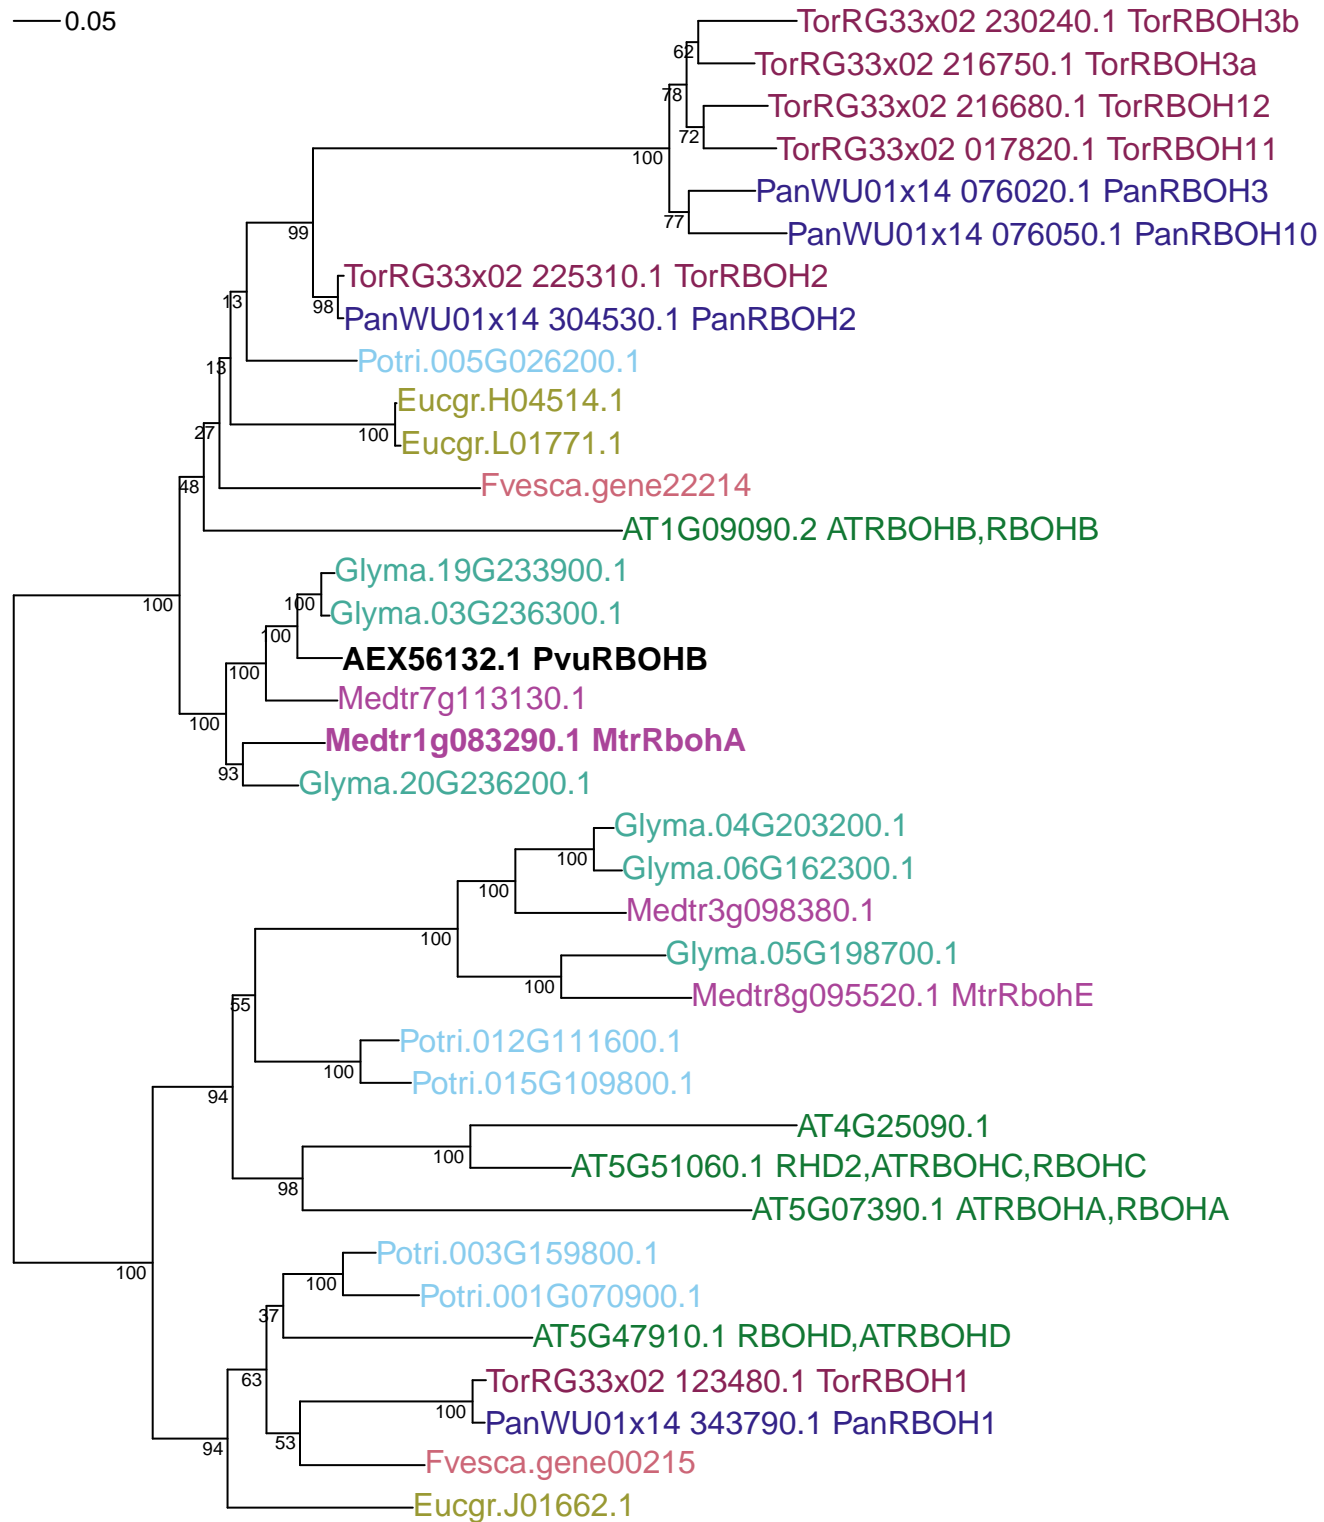

# OG0002024: Enzymes. nicotianamine synthase

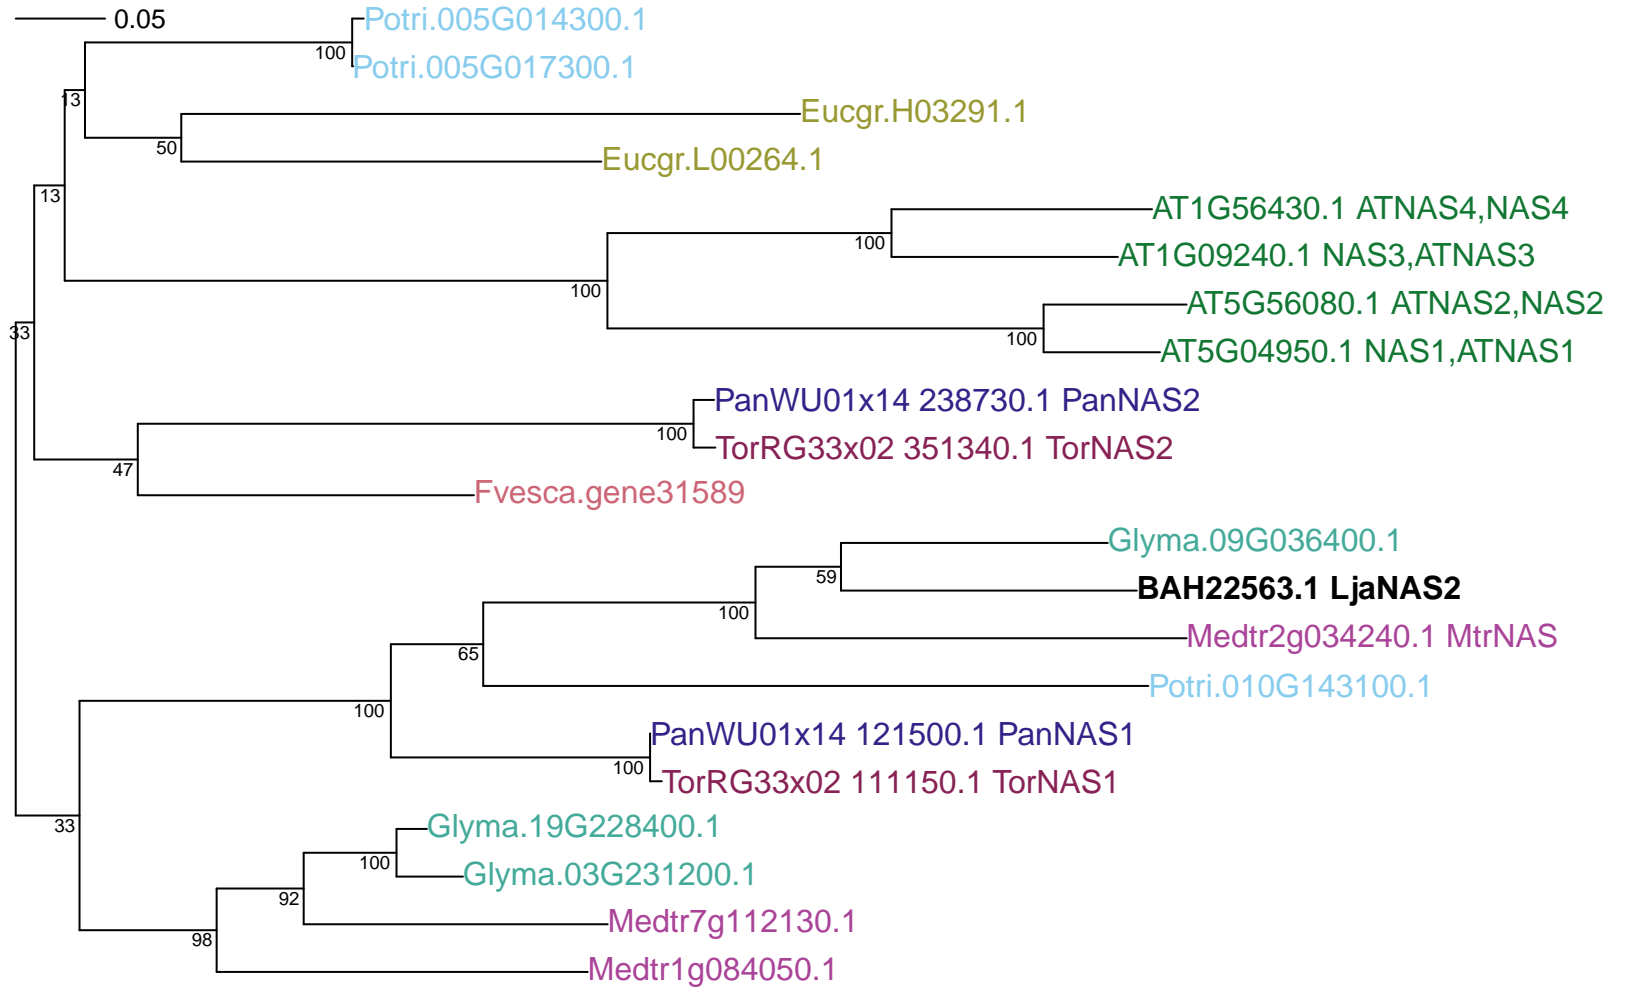

# OG0001113: Enzymes. phosphoenolpyruvate carboxylase

0.05

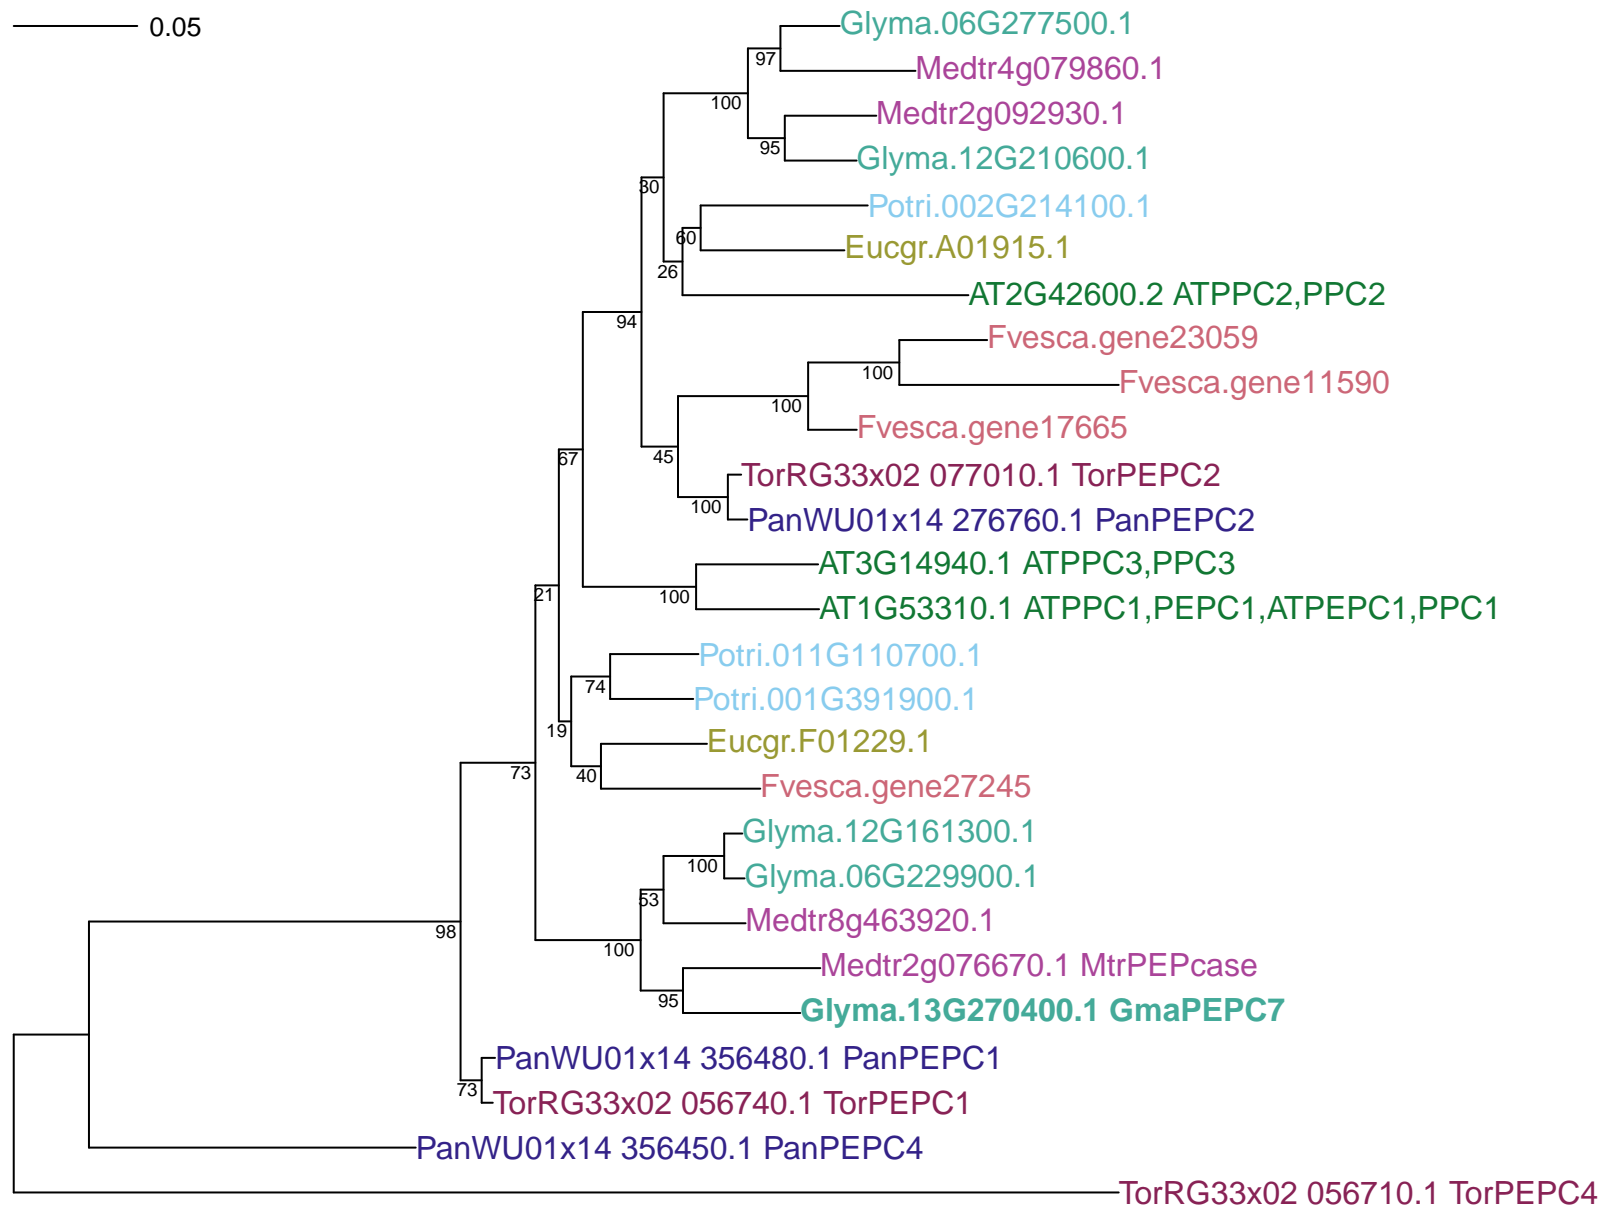

# OG0000392: Enzymes. subtilisin-like protease

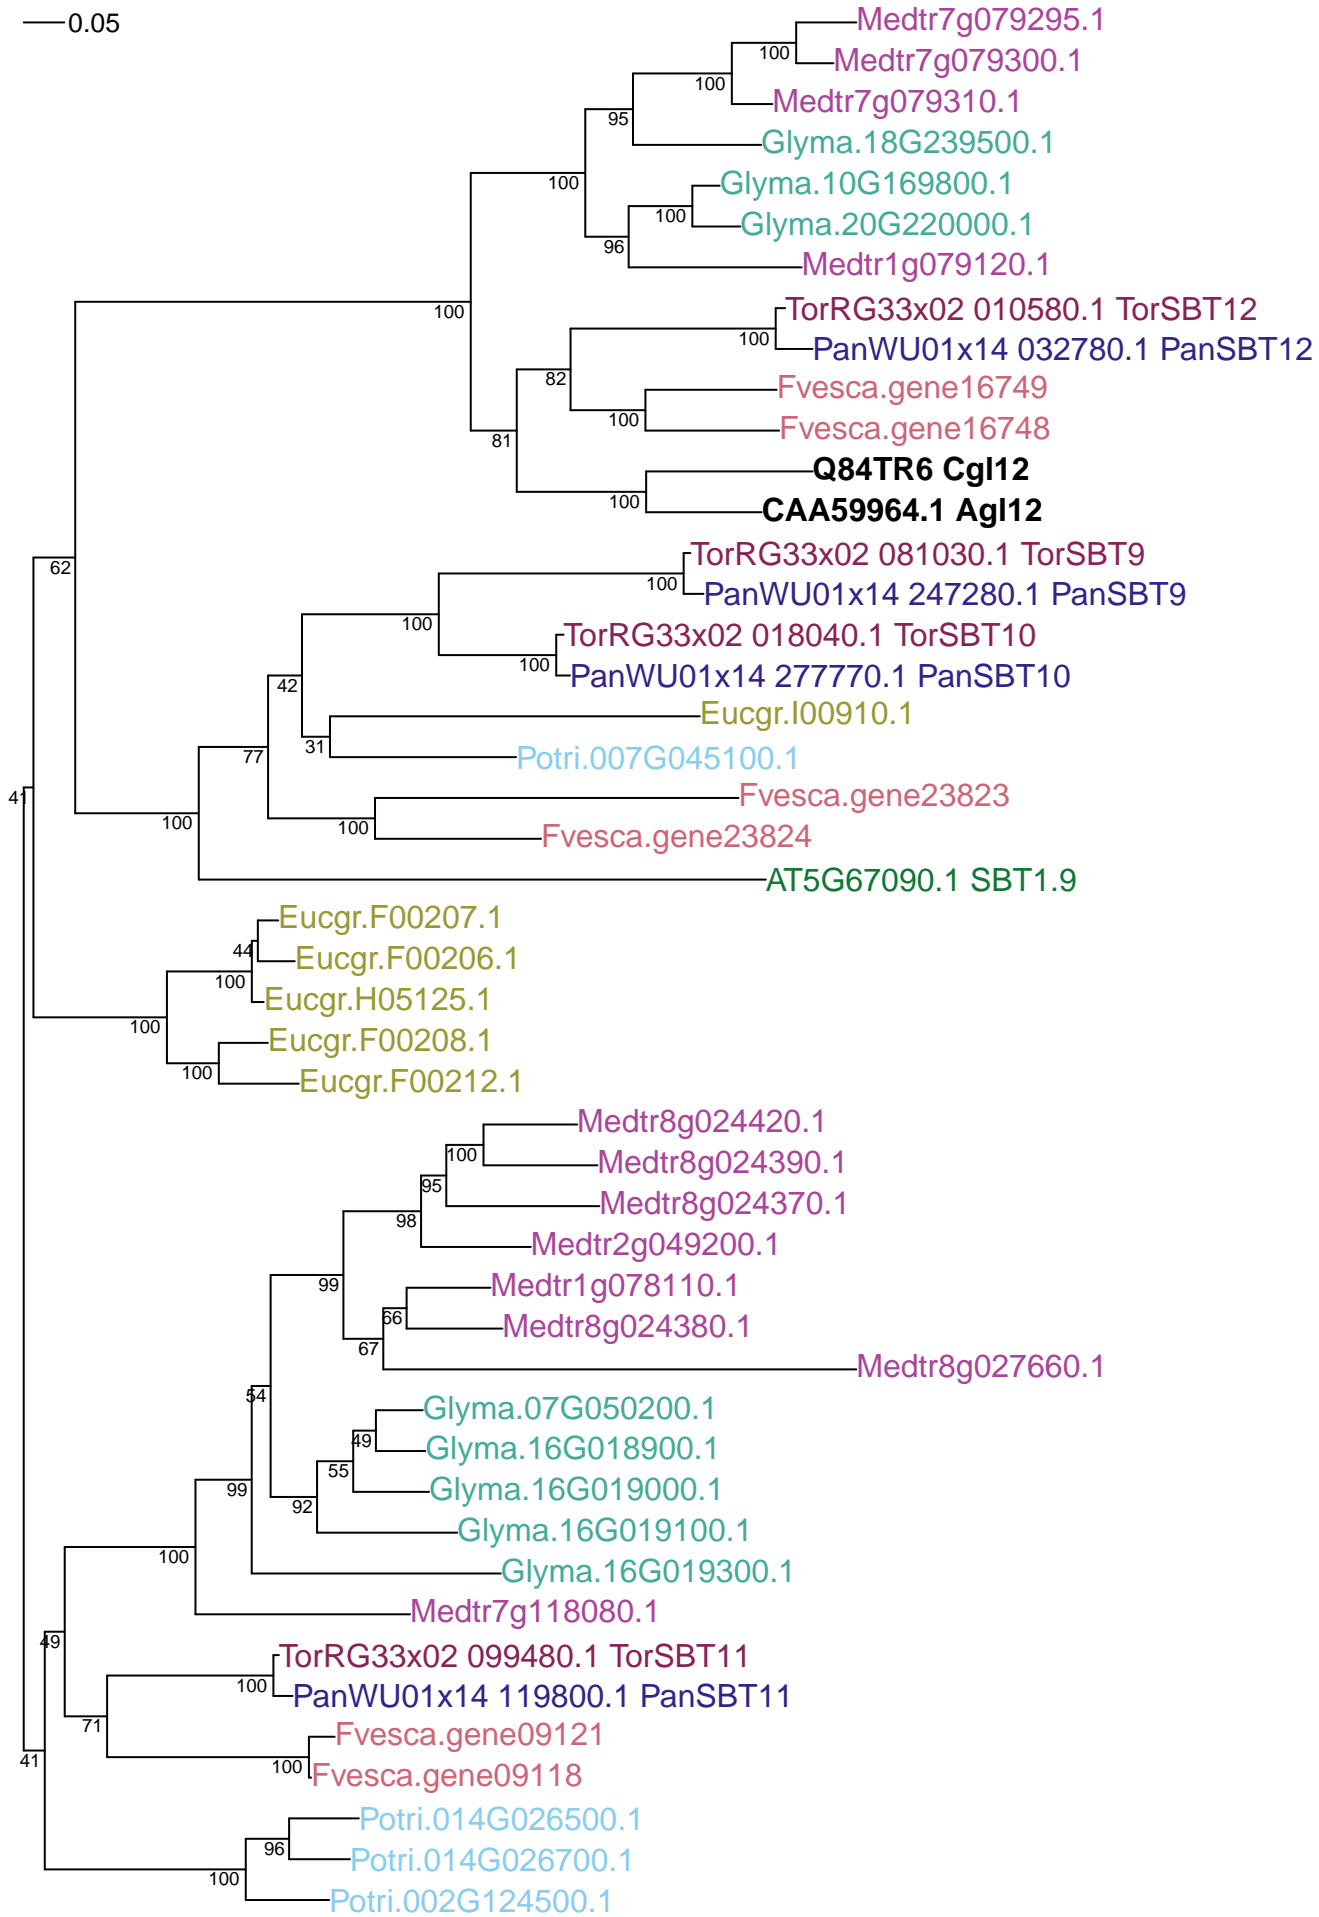

## OG0009725: Enzymes. subtilisin-like serine protease

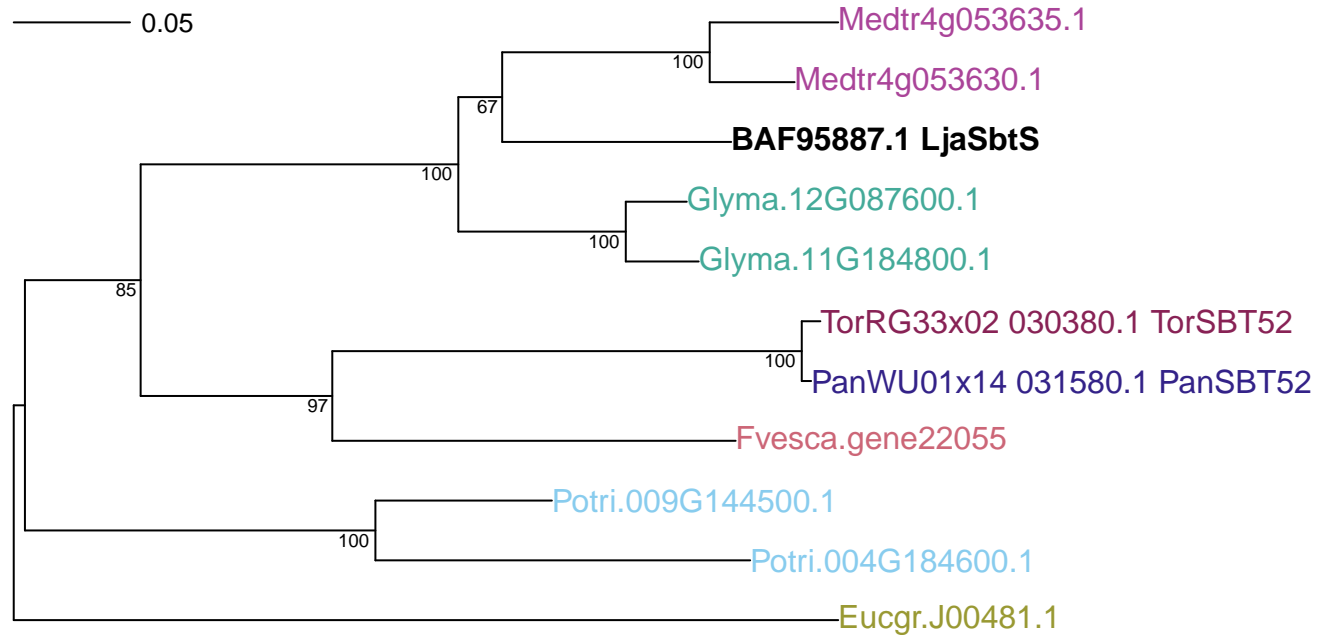

# OG0000900: Enzymes. sucrose synthase

0.05

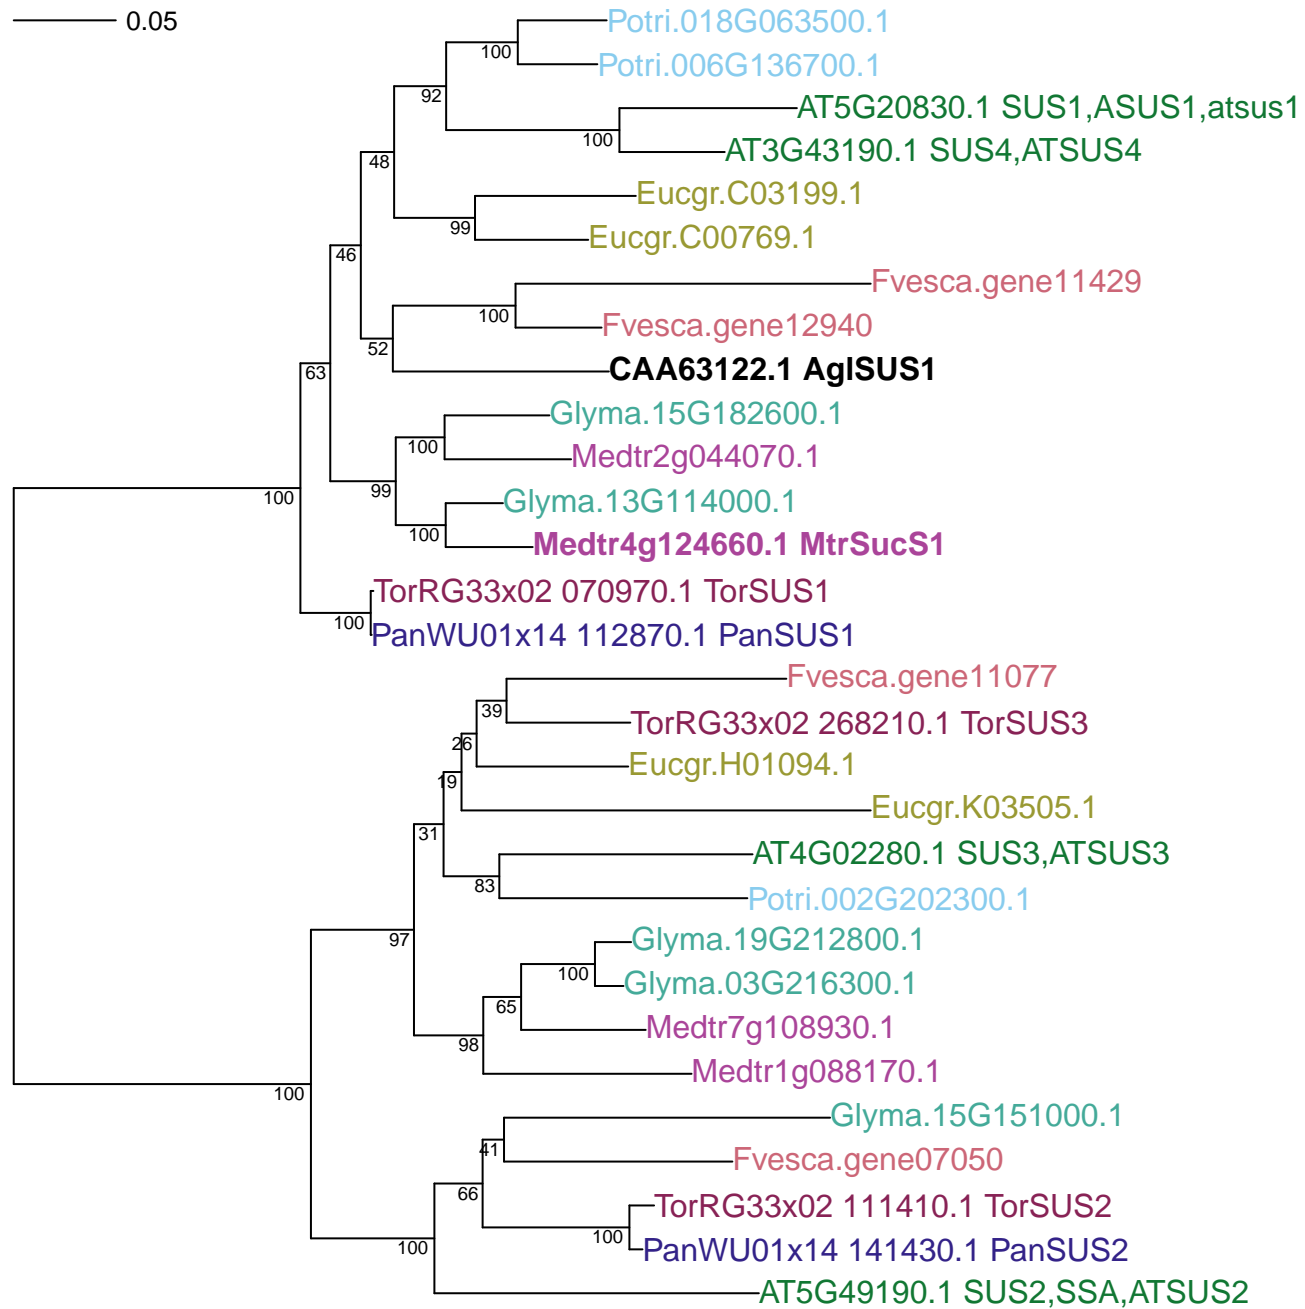

## OG0010416: Enzymes. uricase

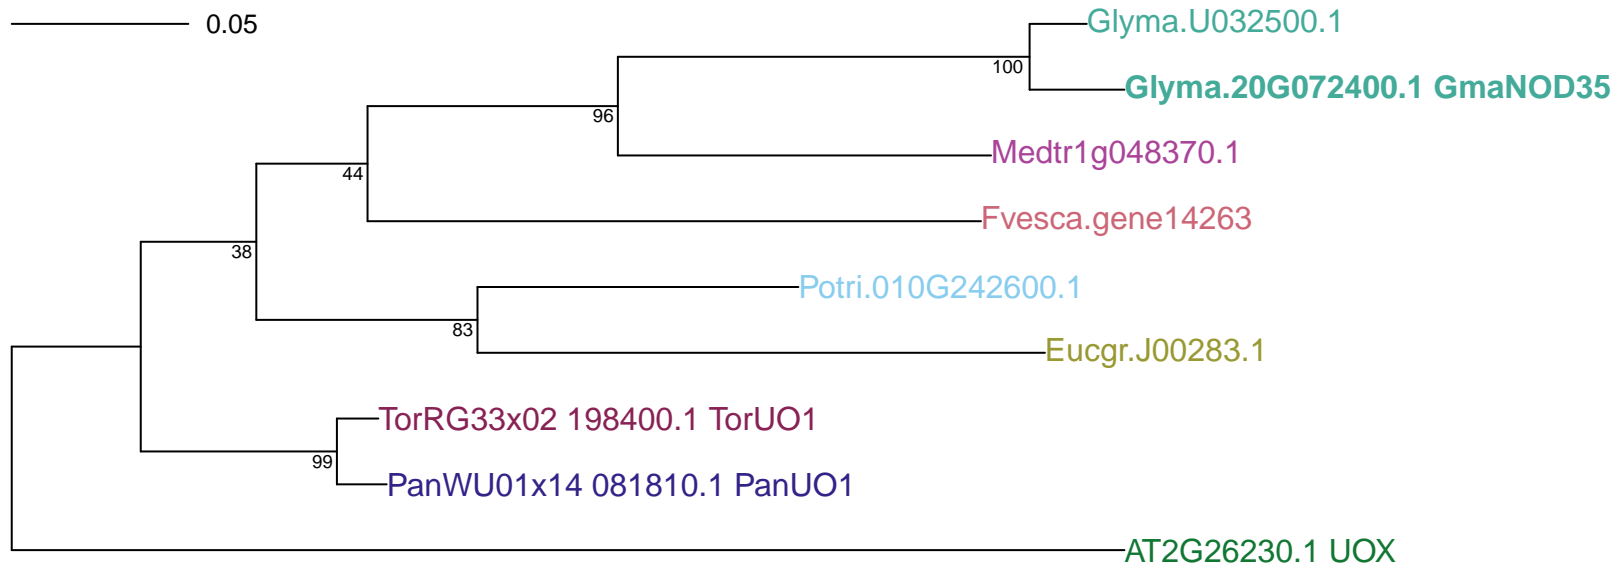

Supplement: pnas.1721395115.sd03.pdf [file pnas.1721395115.sd03.pdf]
