# Supplementary material for: Comparative genomics of the nonlegume Parasponia reveals insights into evolution of nitrogen-fixing rhizobium symbioses
Source: PubMed Central journal article supplement — Proc Natl Acad Sci U S A. 2018 May 1;115(20):E4700–9. doi: 10.1073/pnas.1721395115 (PMC5960304; doi:10.1073/pnas.1721395115), 2018-05-01
Supplement: pnas.1721395115.sapp.pdf [file pnas.1721395115.sapp.pdf]

# Comparative genomics of the non-legume *Parasponia* reveals insights into evolution of nitrogen-fixing rhizobium symbioses

Robin van Velzen<sup>†</sup>, Rens Holmer<sup>†</sup>, Fengjiao Bu<sup>‡</sup>, Luuk Rutten<sup>‡</sup>, Arjan van Zeijl, Wei Liu, Luca Santuari, Qingqin Cao, Trupti Sharma, Defeng Shen, Yuda Roswanjaya, Titis A.K. Wardhani, Maryam Seifi Kalhor, Joelle Jansen, Johan van den Hoogen, Berivan Güngör, Marijke Hartog, Jan Hontelez, Jan Verver, Wei-Cai Yang, Elio Schijlen, Rimi Repin, Menno Schilthuizen, M. Eric Schranz, Renze Heidstra, Kana Miyata, Elena Fedorova, Wouter Kohlen, Ton Bisseling, Sandra Smit, & Rene Geurts

Supplementary figures, tables, and methods.

<sup>†,‡</sup>: These authors contributed equally

## Supplementary figures

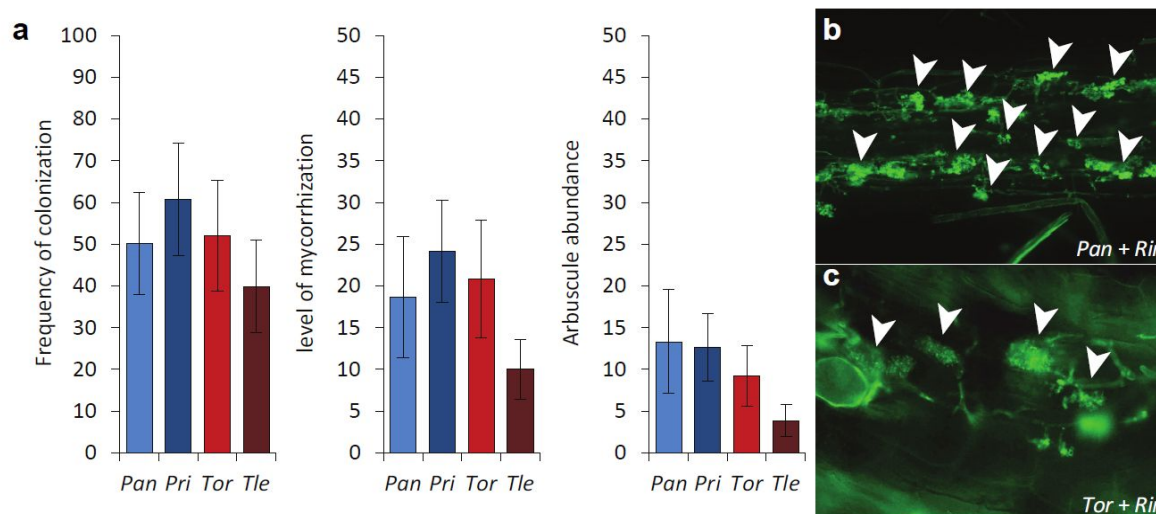

Fig. S1

Arbuscular mycorrhization of *Parasponia* and *Trema* species. **a** Mycorrhization efficiency of *Parasponia andersonii* WU01.14 (Pan), *P. rigida* WU20 (Pri), *Trema orientalis* RG33 (Tor) and *T. levigata* WU50 (Tle), 6 weeks post inoculation with *Rhizophagus irregularis* (Rir), n=10, error bars denote standard errors). **b, c** Confocal image of WGA-Alexafluor 488-stained arbuscules in root segment of either *P. andersonii* (**b**) or *T. orientalis* (**c**).

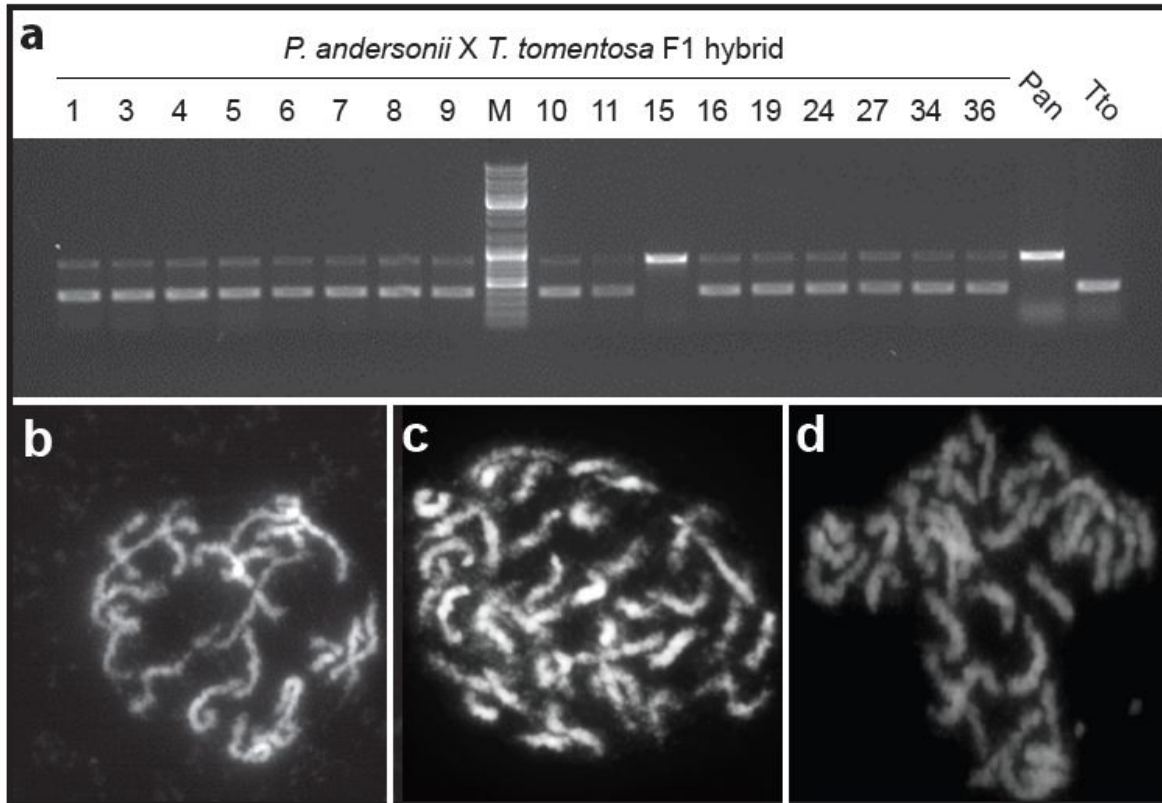

Fig. S2

Genotyping of *Parasponia andersonii* x *Trema tomentosa* F<sub>1</sub> hybrid plants. **a** Genotyping of 17 putative F<sub>1</sub> hybrid plants of the cross *P. andersonii* (Pan) x *T. tomentosa* (Tto) using amplified length polymorphism due to an indel in the *LAX1* promoter. M: generuler DNA ladder mix (ThermoFisher Scientific). Hybrid plants 4, 8, 9, 16, 19 and 36 were used for further experiments. **b-d** Mitotic metaphase chromosome complement of *P. andersonii* ( $2n=2x=20$ ) (**b**), *T. tomentosa* ( $2n=4x=40$ ) (**c**), and F1 hybrid ( $2n=3x=30$ ) (**d**).

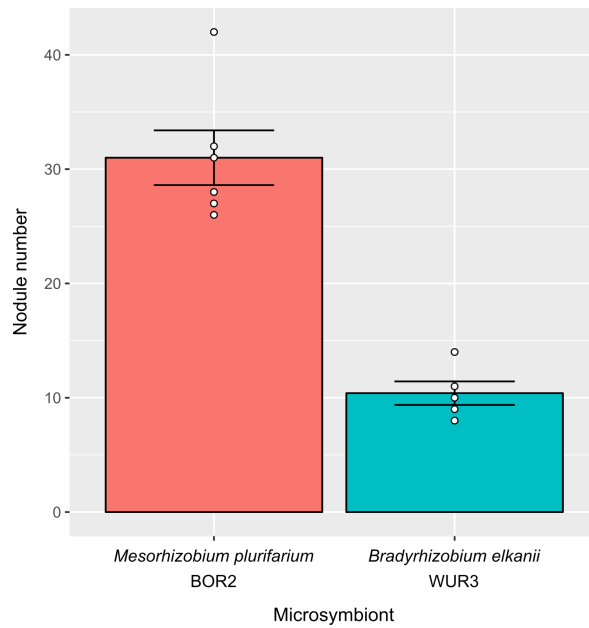

Fig. S3

Nodulation efficiency of *Parasponia andersonii*. Mean number of nodules on roots of *P. andersonii* inoculated with either *Mesorhizobium plurifarium* BOR2 (n=6) or *Bradyrhizobium elkanii* WUR3 microsymbionts (n=5) (6 weeks post inoculation). Dots represent individual measurements.

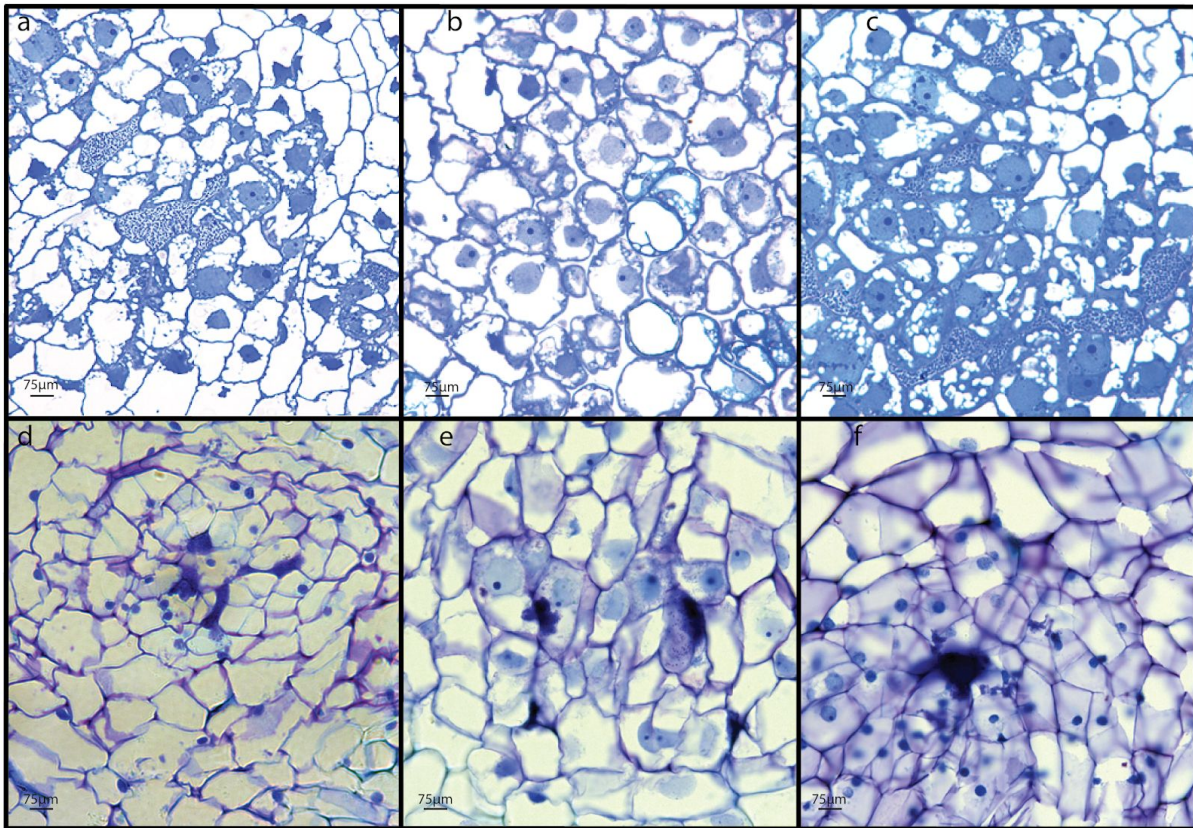

Fig. S4

Longitudinal sections of root nodules of *Parasponia andersonii* x *Trema tomentosa* F1 hybrid plants. Hybrid plants H4, H8, H9, H16, H19 and H36 were clonally propagated and inoculated and inoculated with either *Bradyrhizobium elkanii* WUR3 (**a-c**) or *Mesorhizobium plurifarium* BOR2 (**d-f**). **a** H4 nodule induced by *B. elkanii* WUR3. **b** H8 nodule induced by *B. elkanii* WUR3. **c** H9 nodule induced by *B. elkanii* WUR3. **d** H16 nodule induced by *M. plurifarium* BOR2. **e** H19 nodule induced by *M. plurifarium* BOR2. **f** H36 nodule induced by *M. plurifarium* BOR2. Note absence of intracellular infection in all sectioned nodules.

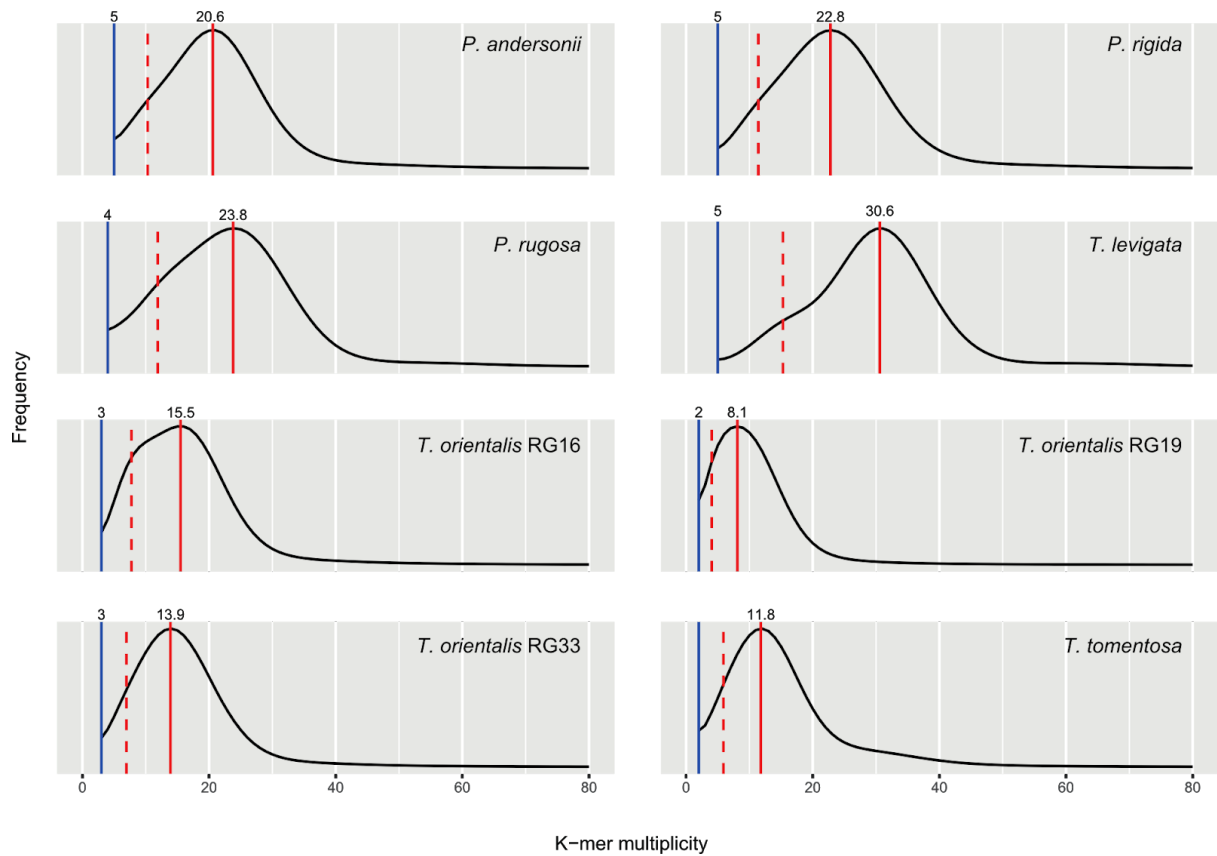

Fig. S5

Genome coverage and heterozygosity estimates based on k-mer analysis of *Parasponia* and *Trema* species. Plots of 21-mer multiplicity frequencies based on jellyfish output showing that *T. levigata* and *T. orientalis* RG16 are relatively heterozygous. Solid red lines indicate estimated genome coverage corresponding to homozygous sequence; dashed red lines indicate half the estimated genome coverage corresponding to heterozygous sequence; blue lines indicate estimated error multiplicity threshold.

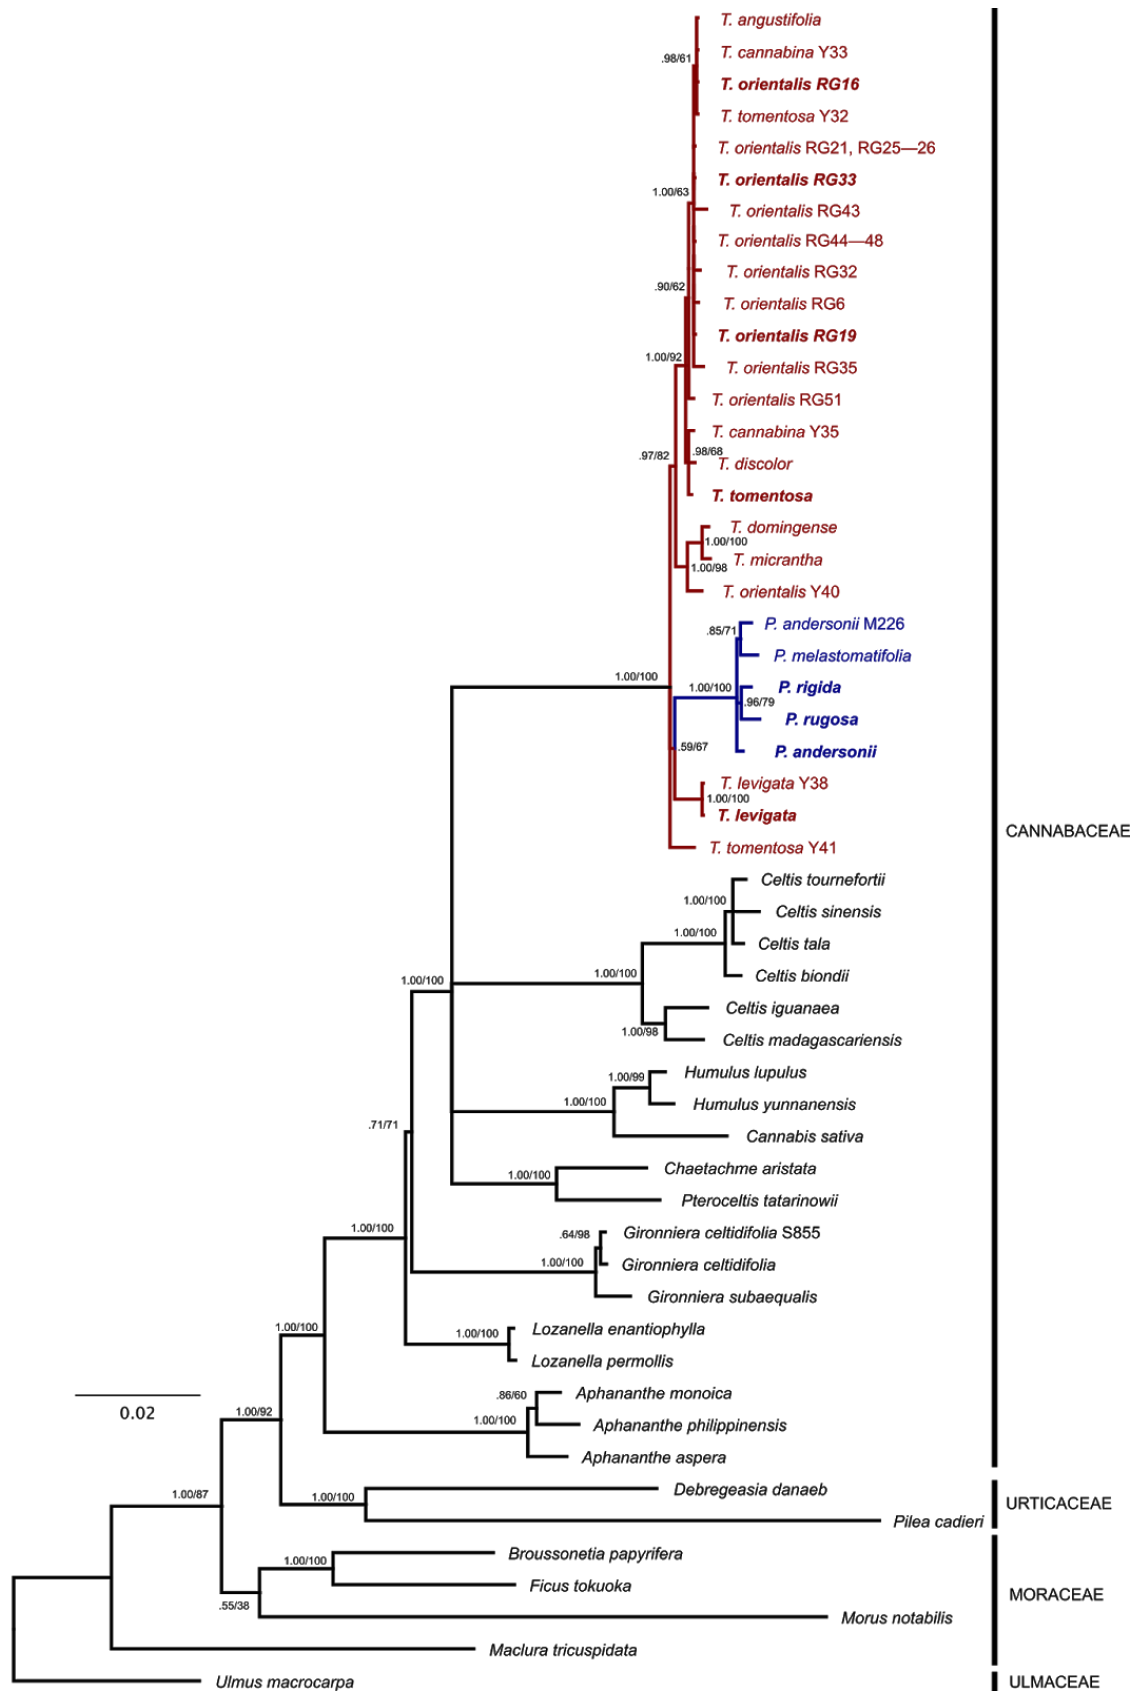

Fig. S6

Phylogenetic reconstruction of the Cannabaceae based on combined analysis of four plastid

markers. Bayesian tree based on five optimal partitions and models of sequence evolution: atpB-rbcL combined with trnL-F (GTR+I+G); first codon position of rbcL (GTR+I+G); second position of rbcL (SYM+I+G); third position of rbcL (GTR+G); rps16 (GTR+G). Node values indicate posterior probability / RAxML bootstrap support; scale bar represents substitutions per site. *Parasponia* lineage is in blue, *Trema* lineages are in red. Note that sister relationship of *Parasponia* and *T. levigata* has low bootstrap support, but is independently supported by four shared sequence insertions (Fig. S8). Accessions selected for comparative genome analysis in bold. GenBank accession numbers are in Dataset S7.



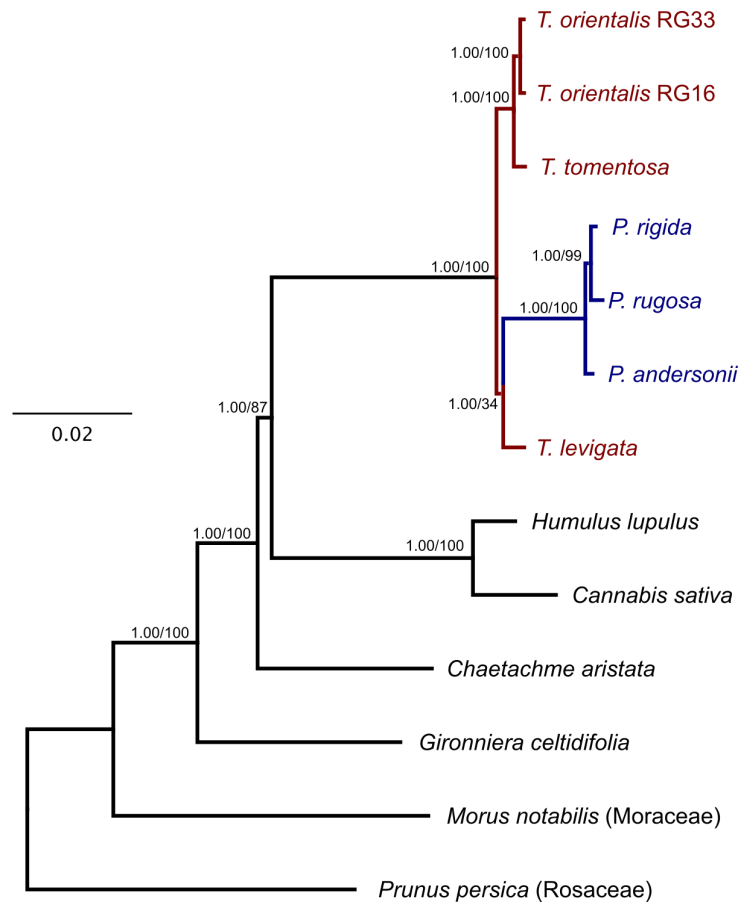

Fig. S7

Phylogenetic reconstruction of the Cannabaceae based on chloroplast genomes. Bayesian tree based on eight optimal partitions and models of sequence evolution: tRNA sequence (HKY+I), rRNA sequence (GTR+I), long single copy region (LSC) coding sequence (GTR+I+G), LSC non-coding sequence (GTR+G), short single copy region (SSC) coding sequence (GTR+G), SSC non-coding sequence (GTR+G), inverted repeat region (IR) coding sequence (GTR+G), and IR non-coding sequence (GTR+G). *Parasponia* lineage is in blue, *Trema* lineages are in red. Note that sister relationship of *Parasponia* and *T. levigata* has low bootstrap support but is independently supported by four shared sequence insertions (Fig. S8). Node values indicate posterior probability / RAxML bootstrap support; scale bar represents substitutions per site. GenBank accession numbers are in Dataset S7.

**a**

|                                |                          |              |          |          |                |                         |
|--------------------------------|--------------------------|--------------|----------|----------|----------------|-------------------------|
|                                | 5,100                    | 5,110        | 5,120    | 5,130    | 5,140          | 5,150                   |
| <i>P. andersonii</i>           | TGTAGACCAACTCTTGTCTCTTAA | CNTAGTCGAT   | TCCATTAT | TCTATA   | TTTA           | -----GAAATT             |
| <i>P. rigida</i>               | TGTAGACCAACTCTTGTCTCTTAA | CNTAGTCGAT   | TCCATTAT | TCTATA   | TTTA           | -----GAGATT             |
| <i>P. rugosa</i>               | TGTAGACCAACTCTTGTCTCTTAA | CNTAGTCGAT   | TCCATTAT | TCTATA   | TTTA           | GAAATTTA                |
| <i>T. levigata</i>             | TGTAGACCAACTCTTGTCTCTTAA | CNTAGTCGAT   | TCCATTAT | TCTATA   | TTTA           | -----AATTAATATT         |
| <i>T. orientalis</i> RG16      | TGTAGACCAACTCTTGTCTCTTAA | CNTA         | -----    | TCCATTAT | TCTAT          | GCTCA                   |
| <i>T. orientalis</i> RG33      | TGTAGACCAACTCTTGTCTCTTAA | CNTA         | -----    | TCCATTAT | TCTAT          | GCTCA                   |
| <i>Cannabis sativa</i>         | TGTAGACCTACTCTTGTCTCTTAA | GNTA         | -----    | TT       | CATTAT         | TCTAT                   |
| <i>Humulus lupulus</i>         | TGTAGACCAACTCTTGTCTCTTAA | GNTA         | -----    | TCCATTAT | TCTAT          | -----                   |
| <i>Chaetachme aristata</i>     | -----                    | CTTGTCTCTTAA | GNTA     | -----    | TCCATTAT       | TCTAT                   |
| <i>Gironniera celtidifolia</i> | TGTAGACTAATCTTGTCTCTTAA  | GNTATC       | TN       | TCCATTAT | TCTAT          | TTTATTCATTT             |
| <i>Morus notabilis</i>         | TGTAGACCAACTCTTGTCTCTTAA | GNT          | -----    | TN       | TCCATTAT       | TCTATCTTTAATATCTTATATTA |
| <i>Prunus persica</i>          | TAAAGGACCGCCCTTGTCTCTTAA | GNTA         | -----    | TCCATTAT | AGANTTAGTACATA | AGATTTT                 |

**b**

|                                |                                     |              |         |            |            |       |       |
|--------------------------------|-------------------------------------|--------------|---------|------------|------------|-------|-------|
|                                | 7,110                               | 7,120        | 7,130   | 7,140      | 7,150      | 7,160 | 7,17  |
| <i>P. andersonii</i>           | TGGCAGCAACATACCAATTTTGGGAAATTTCTTTG | TTTG         | FATCAAA | CAATCATACG | AATG       | ATCA  | AA    |
| <i>P. rigida</i>               | TGGCAGCAACATACCAATTTTGGGAAATTTCTTTG | TTTG         | FATCAAA | CAATCATACG | AATG       | ATCA  | AA    |
| <i>P. rugosa</i>               | TGGCAGCAACATACCAATTTTGGGAAATTTCTTTG | TTTG         | FATCAAA | CAATCATAC  | AATG       | ATCA  | AA    |
| <i>T. levigata</i>             | TGGCAGCAACATACCAATTTTGGGGATTTCTTTG  | TTTG         | FATCAAA | GAATCATACG | AATG       | ATCA  | AA    |
| <i>T. orientalis</i> RG16      | TGGCAGCAACATACCAATTTTGGGGATTTCTTTG  | TTTG         | FATCAAA | GAATCATACG | AATG       | ATCA  | AA    |
| <i>T. orientalis</i> RG33      | TGGCAGCAACATACCAATTTTGGGGATTTCTTTG  | TTTG         | FATCAAA | GAATCATACG | AATG       | ATCA  | AA    |
| <i>Cannabis sativa</i>         | TAGCAGCAACATACCAATTTTGA             | GGGATTTCTTTG | TTT     | FATCAAA    | GAATCATACG | AATG  | TTGA  |
| <i>Humulus lupulus</i>         | TAGCAGCAACATACCAATTTTGA             | GGGATTTCTTTG | TTT     | FATCAAA    | GAATCATACG | AATG  | TTGA  |
| <i>Chaetachme aristata</i>     | TAGCAGCAACATACCAATTTTGGGGATTTCTTTG  | TTTG         | FATCAAA | GAATCAT    | CGAATG     | TTGA  | TTGA  |
| <i>Gironniera celtidifolia</i> | -----                               | -----        | -----   | -----      | -----      | ----- | ----- |
| <i>Morus notabilis</i>         | TGGCAGCAACATACCAATTTT               | TTT          | FATCAAA | GAATCATACG | AATG       | TTGA  | TTGA  |
| <i>Prunus persica</i>          | TGGCAGCAACATACCAATTTT               | TTT          | FATCAAA | GAATCATAT  | GAATG      | TTGA  | TTGA  |

**c**

|                                |              |           |              |        |           |                         |
|--------------------------------|--------------|-----------|--------------|--------|-----------|-------------------------|
|                                | 15,640       | 15,650    | 15,660       | 15,670 | 15,680    | 15,690                  |
| <i>P. andersonii</i>           | AAAAAAGATAAA | AAAGGGGGT | TTGAATG      | AAATAC | AAATACACA | -----TTTTTTTTTTCAATTTTT |
| <i>P. rigida</i>               | AAAAAAGATA   | AAAGGGGGT | TTGAATG      | AAATAC | AAATACACA | -----TTTTTTTTTTCAATTTTT |
| <i>P. rugosa</i>               | AAAAAAGATCA  | AAAGGGGGT | TTGAATG      | AAATAC | AAATACACA | TTTTTTTTTTTTCAATTTTT    |
| <i>T. levigata</i>             | AAAAAAGATA   | AAAGGGGGT | TTGAATG      | AAATAC | AAATACACA | TTTTTTTTTTTTTTCAATTTTT  |
| <i>T. orientalis</i> RG16      | AAAAAAGATAAA | AAAGGGGGT | TTGAATG      | -----  | AAATACACA | TTTTTTTTTTTTTTCAATTTTT  |
| <i>T. orientalis</i> RG33      | AAAAAAGATAAA | AAAGGGGGT | TTGAATG      | -----  | AAATACACA | TTTTTTTTTTTTTTCAATTTTT  |
| <i>Cannabis sativa</i>         | AAAAAAGATAAA | AAAGGGGGT | TTGAATG      | -----  | AAATACACA | TTTTTTTTTTATTTCAATTTTT  |
| <i>Humulus lupulus</i>         | AA           | -----     | AAAGGGGGGTTG | -----  | AAATACACA | TTTTTTTTTTTTCATTTTT     |
| <i>Chaetachme aristata</i>     | AAAAAAGATAAA | AAAGGGGGT | TTG          | -----  | AAATACAG  | -----TTTTTTTATATTTTT    |
| <i>Gironniera celtidifolia</i> | AAAAAAGATAAA | AAAGGGGGT | TTG          | -----  | AAATCACA  | -----TTTTTTATATTTTT     |
| <i>Morus notabilis</i>         | AAAAAGATAAA  | GGGGGGT   | TTG          | -----  | AAATAC    | TTTTTTTTTTCATTTTT       |
| <i>Prunus persica</i>          | AAAAAAGATAAA | AAAGGGGGT | TTG          | -----  | AAATACCA  | -----TTTTTTTTCATTTTT    |

**d**

|                                |           |          |           |          |        |                           |
|--------------------------------|-----------|----------|-----------|----------|--------|---------------------------|
|                                | 75,470    | 75,480   | 75,490    | 75,500   | 75,510 | 75,520                    |
| <i>P. andersonii</i>           | TCGAAAAGT | GATCCT   | TTTTTTTTT | ATATCATT | TATCAT | ATTTAGCTGAATAAAAAAATTA    |
| <i>P. rigida</i>               | TCGAAAAGT | GATCCT   | TTTTTTTTT | ATATCATT | TATCAT | ATTTAGCTGAATAAAAAAATTA    |
| <i>P. rugosa</i>               | TCGAAAAGT | GATCCT   | TTTTTTTTT | ATATCATT | TATCAT | ATTTAGCTGAATAAAAAAATTA    |
| <i>T. levigata</i>             | TCGAAAAGT | GATCCA   | TTTTTTTTT | ATATCATT | TATCAT | ATTTAGCTGAATAAAAAAATTA    |
| <i>T. orientalis</i> RG16      | TCGAAAAGT | GATCCA   | TTTTTTTTT | ATAT     | -----  | ATCATTTAGCTGAATAAAAAAATTA |
| <i>T. orientalis</i> RG33      | TCGAAAAGT | GATCCA   | TTTTTTTTT | ATAT     | -----  | ATCATTTAGCTGAATAAAAAAATTA |
| <i>Cannabis sativa</i>         | TCGAAA    | AAATCCT  | TTTTTTT   | GTAT     | -----  | CATTTAGCTGAATAAAAAAATTA   |
| <i>Humulus lupulus</i>         | TCGAAA    | AAATA    | TTTTTTTTT | TAT      | -----  | CATTTAGCTGAATAAAAAAATTA   |
| <i>Chaetachme aristata</i>     | TYAGNT    | ACCCCTCT | TTCTTTT   | -----    | -----  | ATTTAGCTGAATAAAAAAATTA    |
| <i>Gironniera celtidifolia</i> | -----     | -----    | -----     | -----    | -----  | -----                     |
| <i>Morus notabilis</i>         | TTATA     | AAAAAT   | ATAAGCT   | TATATA   | AA     | -----                     |
| <i>Prunus persica</i>          | TCAT      | ATA      | AAAAAT    | ATTAT    | TG     | -----                     |

**e**

|                                |           |         |        |        |           |           |                     |
|--------------------------------|-----------|---------|--------|--------|-----------|-----------|---------------------|
|                                | 75,300    | 75,310  | 75,320 | 75,330 | 75,340    | 75,350    | 75,360              |
| <i>P. andersonii</i>           | TATCCAAAC | AGTAAT  | TGAGT  | CATTC  | -----     | TTCTTTCAT | TTGGAAAGTATCGAGGGAT |
| <i>P. rigida</i>               | TATCCAAAC | AGTAAT  | TGAGT  | CATTC  | -----     | TTCTTTCAT | TTGGAAAGTATCGAGGGAT |
| <i>P. rugosa</i>               | TATCCAAAC | AGTAAT  | TGAGT  | CATTC  | -----     | TTCTTTCAT | TTGGAAAGTATCGAGGGAT |
| <i>T. levigata</i>             | TATCCAAAC | AGTAAT  | TGAGT  | CATTC  | -----     | TTCTTTCAT | TTGGAAAGTATCGAGGGAT |
| <i>T. orientalis</i> RG16      | -----     | CGGTAAT | TGAGT  | ATTC   | TTCTTTCAT | TTCTTTCAT | TTGGAAAGTATCGAGGGAT |
| <i>T. orientalis</i> RG33      | -----     | CGGTAAT | TGAGT  | ATTC   | TTCTTTCAT | TTCTTTCAT | TTGGAAAGTATCGAGGGAT |
| <i>Cannabis sativa</i>         | -----     | -----   | -----  | -----  | -----     | -----     | TAAAGTATCGAGGGAT    |
| <i>Humulus lupulus</i>         | -----     | -----   | -----  | -----  | -----     | -----     | TAAAGTATCGAGGGAT    |
| <i>Chaetachme aristata</i>     | TATCCAAAC | AGGAAAT | TGAGT  | ATTC   | -----     | TTCTTTCAT | TTGGAAAGTATCGAGGGAT |
| <i>Gironniera celtidifolia</i> | -----     | -----   | -----  | -----  | -----     | -----     | -----               |
| <i>Morus notabilis</i>         | -----     | -----   | -----  | -----  | -----     | -----     | -----               |
| <i>Prunus persica</i>          | TATCCAA   | AAAGT   | AAATAG | AGTGA  | -----     | TTCTTTC   | TTTTCAGTATCGAGGGAT  |

Fig. S8

Chloroplast genome insertions in Cannabaceae. Shared sequence insertions in chloroplast genomes supporting (**a-d**) or refuting (**e**) sister relationship of *Parasponia* and *Trema levigata*. **a** *matK-rps16* intergenic spacer, **b** *rps16-psbK* intergenic spacer, **c** *atpF* intron, **d, e** *petA-psbJ* intergenic spacer. Numbers indicate alignment coordinates; colours indicate percent identity while ignoring gaps: green = 100%, olive = 80-100%, yellow = 60-80%; black rectangles mark shared sequence insertions concerned.

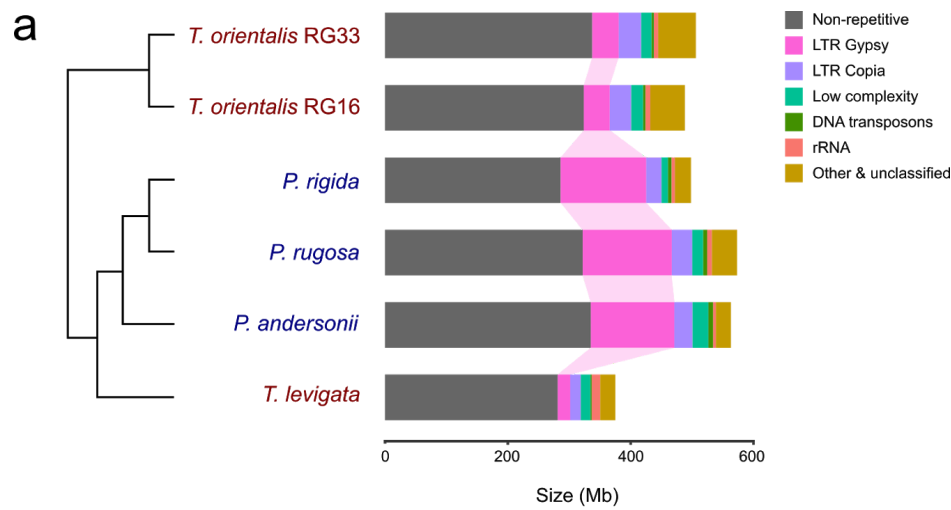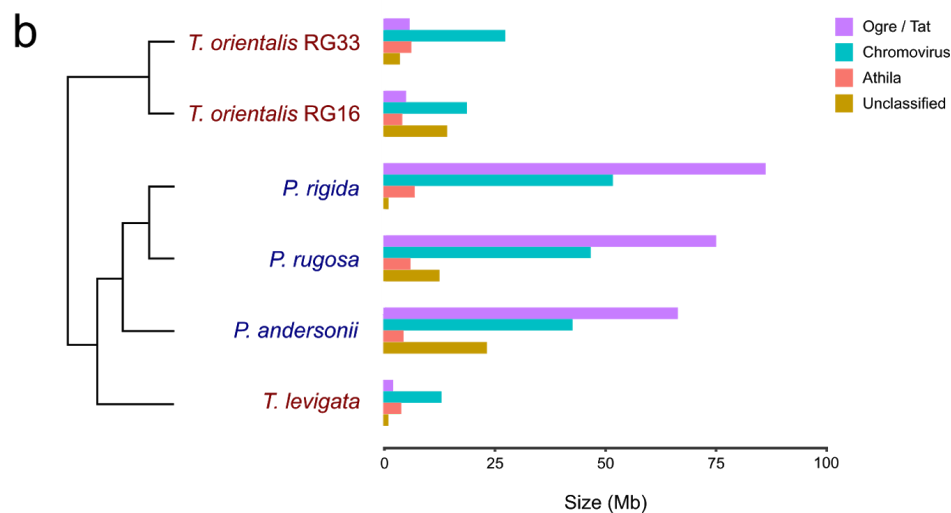

Fig. S9

*Parasponia* and *Trema* genome structure. Estimated genome sizes and fractions of different classes of repeats as detected by RepeatExplorer, calibrated using k-mer based genome size estimates. **a** Total genome sizes and fractions of major repeat classes showing 1) a conserved size of around 300 Mb of non-repetitive sequence, and 2) a large expansion of gypsy-type LTR retrotransposons in all *Parasponia* compared with all *Trema* species. **b** Estimated size of gypsy-type LTR subclasses in *Parasponia* and *Trema* showing that expansion of this class was mainly due to a tenfold increase of Ogre/Tat to around 75Mb in *Parasponia*.

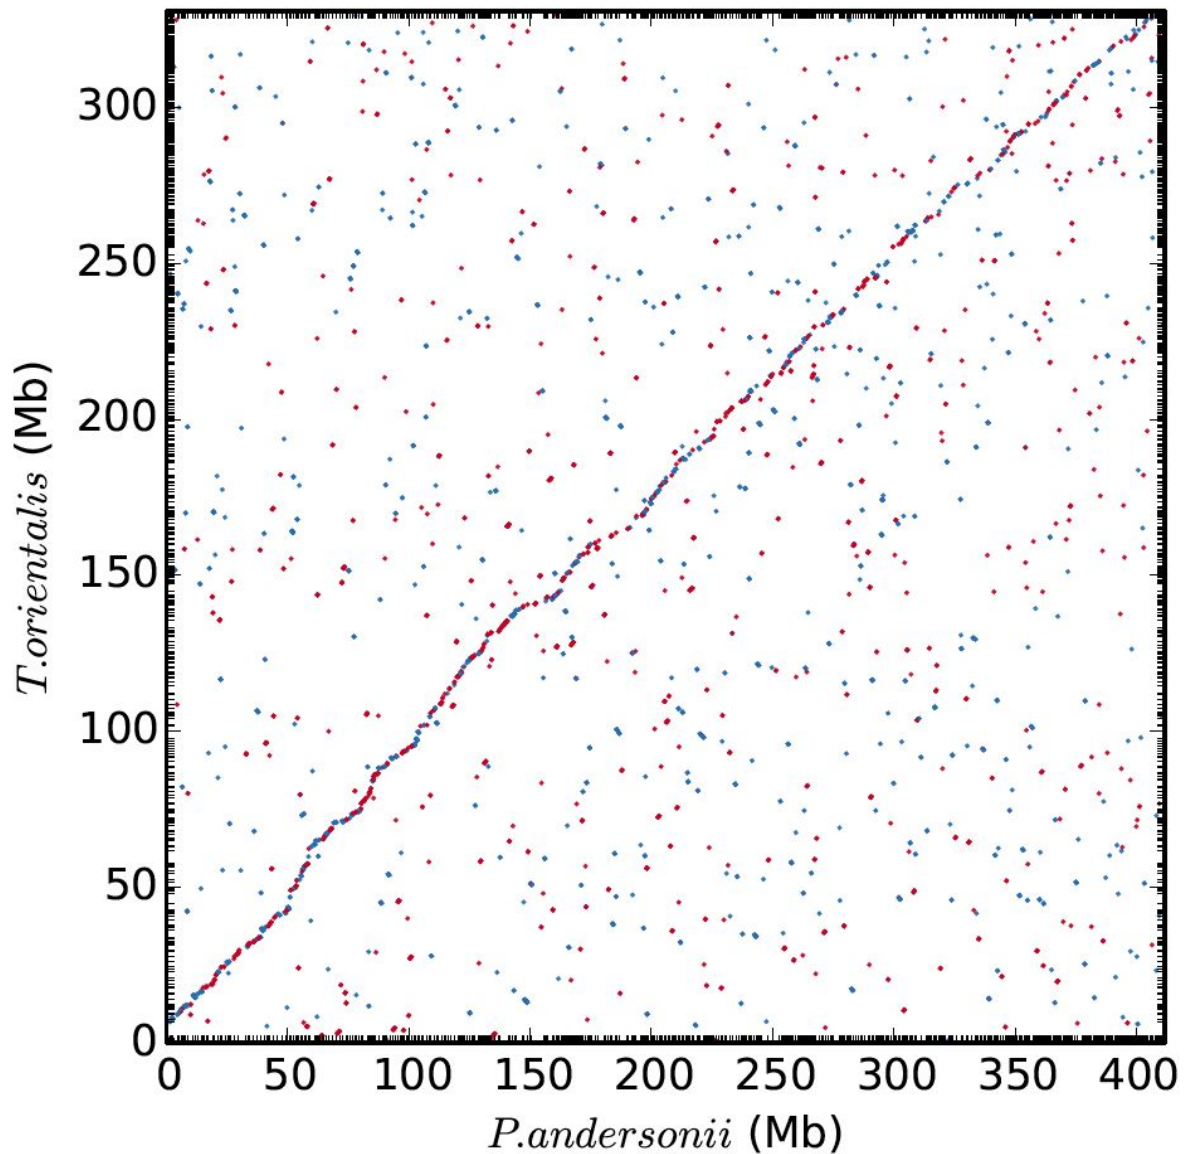

Fig. S10

Whole genome alignment dotplot for *Parasponia andersonii* and *Trema orientalis* RG33.

Maximal unique matching (MUM) alignments were generated using nucmer 4.0.0beta with the following settings: breaklength 500, mincluster 200, maxgap 100, minmatch 80, minalign 7000. Forward alignments are red, reverse alignments are blue. Scaffolds are ordered by alignment size, which results in a clear diagonal line indicating the collinearity of the two genomes.

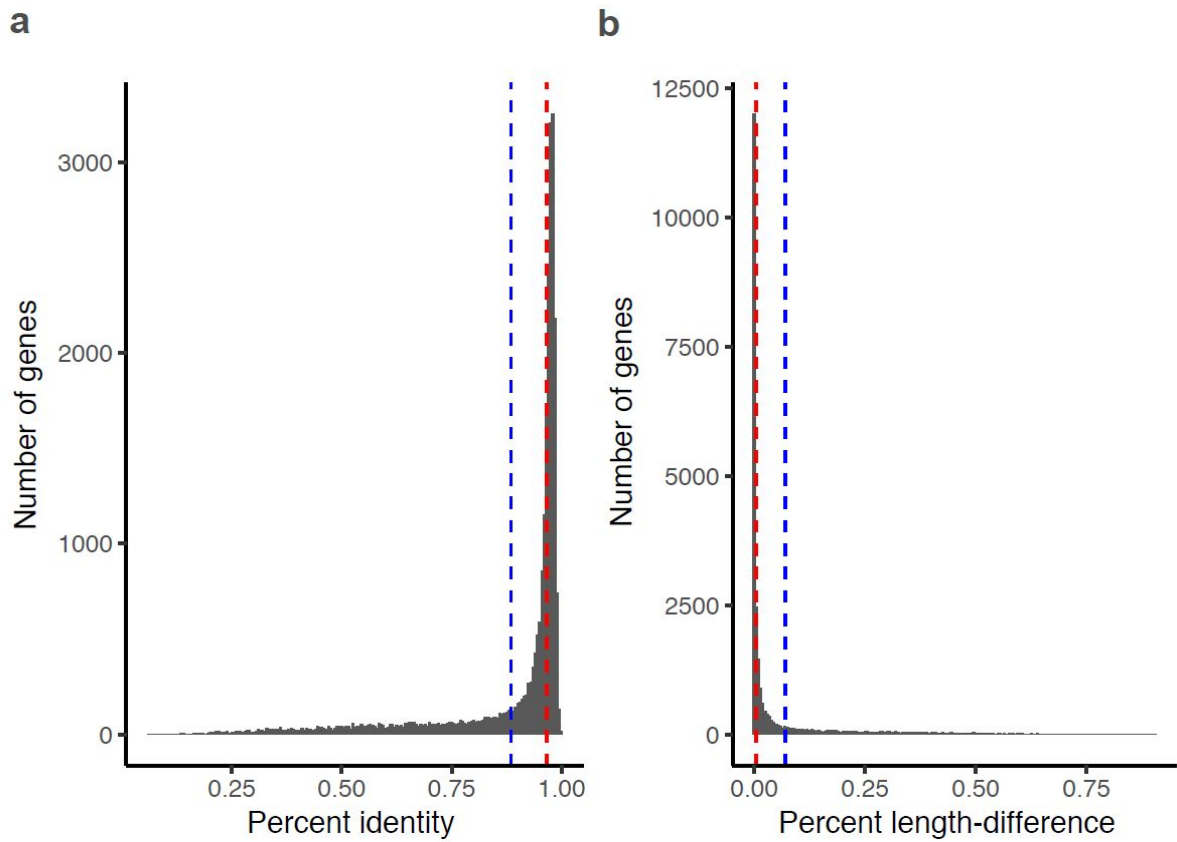

Fig. S11

Identity of *Parasponia andersonii* - *Trema orientalis* putative orthologous gene pairs.

Histograms of (a) percent nucleotide identity (calculated by taking the fraction of identical nucleotides ignoring end gaps using global alignments produced by MAFFT) and (b) length difference of all 25,605 orthologous gene pairs from *P. andersonii* and *T. orientalis* as a percentage of the longest gene. Red line indicates median, blue line indicates mean.

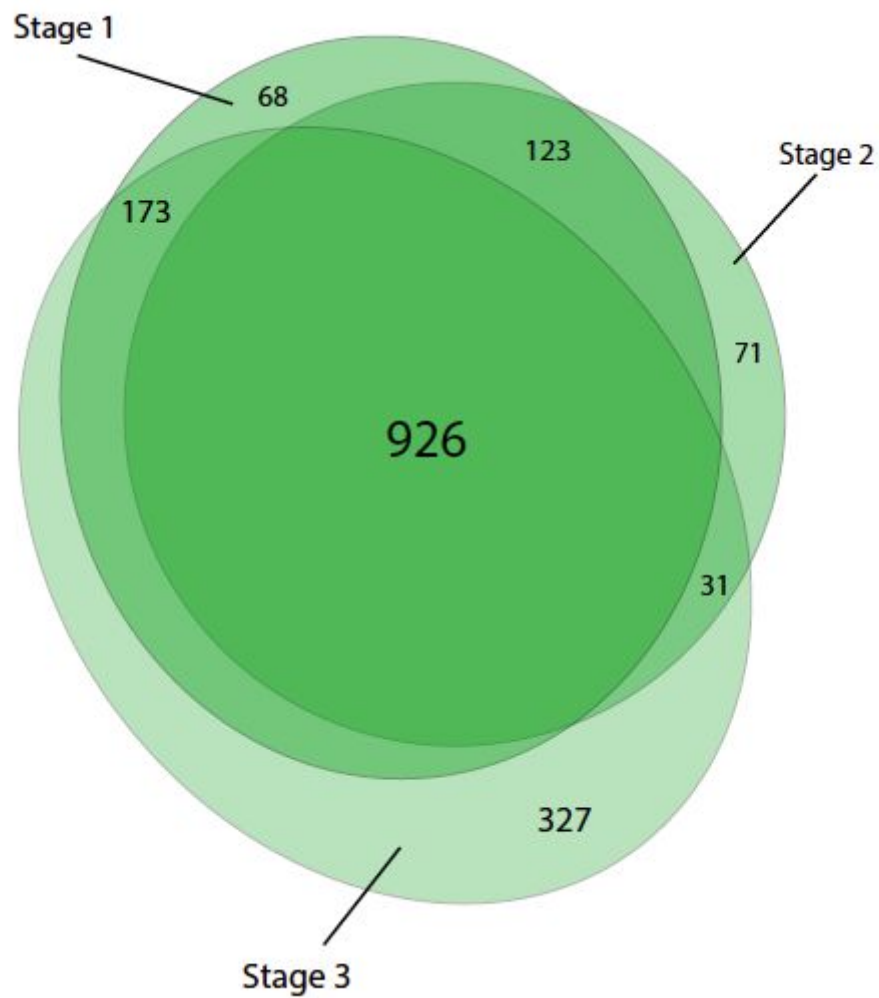

Fig. S12

Venn diagram of *Parasponia andersonii* nodule enhanced genes in 3 developmental stages. Nodule developmental stages according to Fig. 1H-J. List of genes is given in Dataset S4. *P. andersonii* genes are considered 'nodule enhanced' when expression is increased >2-fold in any of 3 nodule developmental stages when compared to non-inoculated root sample. Largest fraction concerns genes enhanced in all 3 stages.

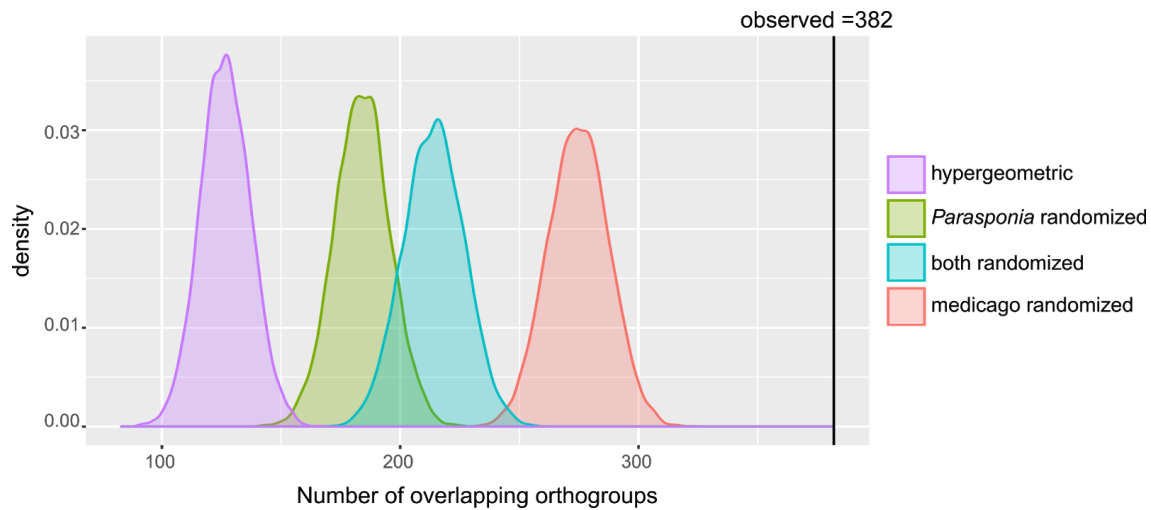

Fig. S13

Statistical testing of common utilization of genes in *Parasponia* and medicago. To assess common utilization of genes in *Parasponia* and medicago nodules we performed statistical testing of overlap between *P. andersonii* and medicago nodule-enhanced genes. Overlap was calculated based on orthogroup membership (i.e. when an orthogroup contains nodule-enhanced genes from *P. andersonii* and medicago it is scored as overlap). Significance of set overlaps is usually calculated based on the hypergeometric distribution. However, because larger orthogroups have higher chance of overlap, the hypergeometric is not suitable. We therefore assessed significance with a permutation test where the null distribution is based on overlap found when gene-orthogroup membership is randomized in the *Parasponia* gene set, the medicago gene set, or both sets (n=10,000). Figure shows density plots of both hypergeometric distribution and permutation random variates. Vertical line shows the observed number of 382 overlapping orthogroups ( $p < 0.0001$  based on permutation tests).



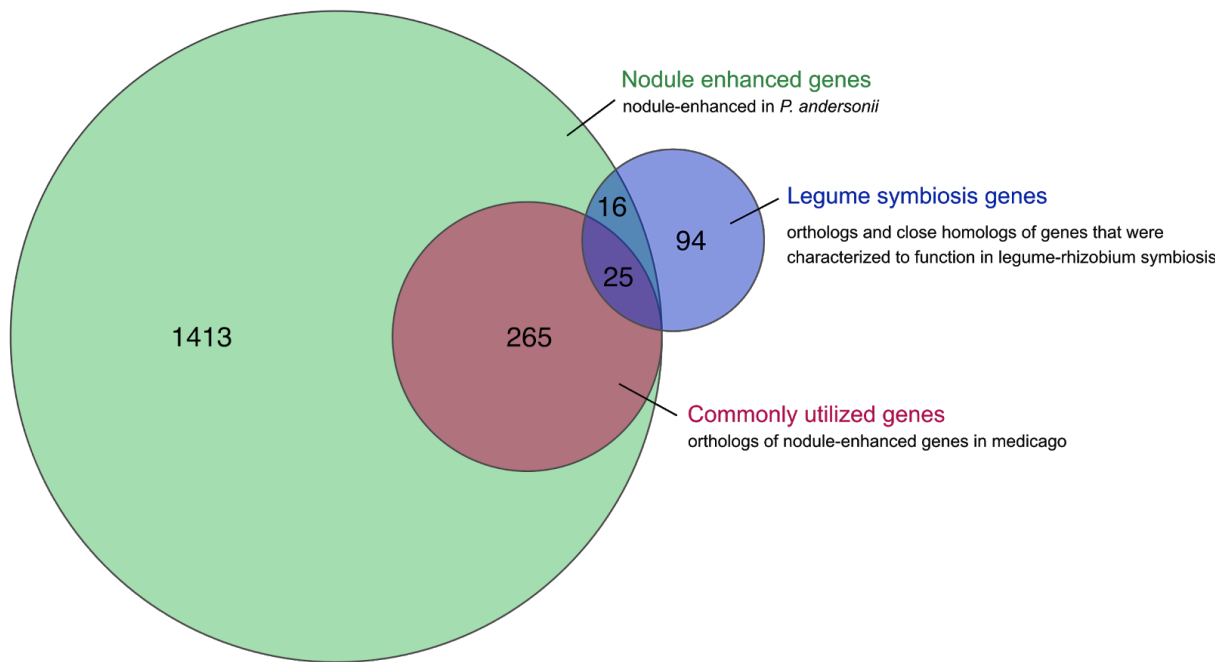

Fig. S14

Venn diagram of *Parasponia andersonii* symbiosis gene sets. Nodule enhanced genes have a significantly enhanced expression level (fold change > 2,  $p < 0.05$ , DESeq2 Wald test) in any of three developmental stages (N = 1,719; Fig. S12, Dataset S4). Commonly utilized genes are nodule-enhanced in *P. andersonii* as well as in the legume medicago (N = 290; Dataset S5, S6). Legume symbiosis genes are putative orthologs or close homologs of genes that were characterized to function in legume-rhizobium symbiosis (N = 135; Dataset S1, S2).

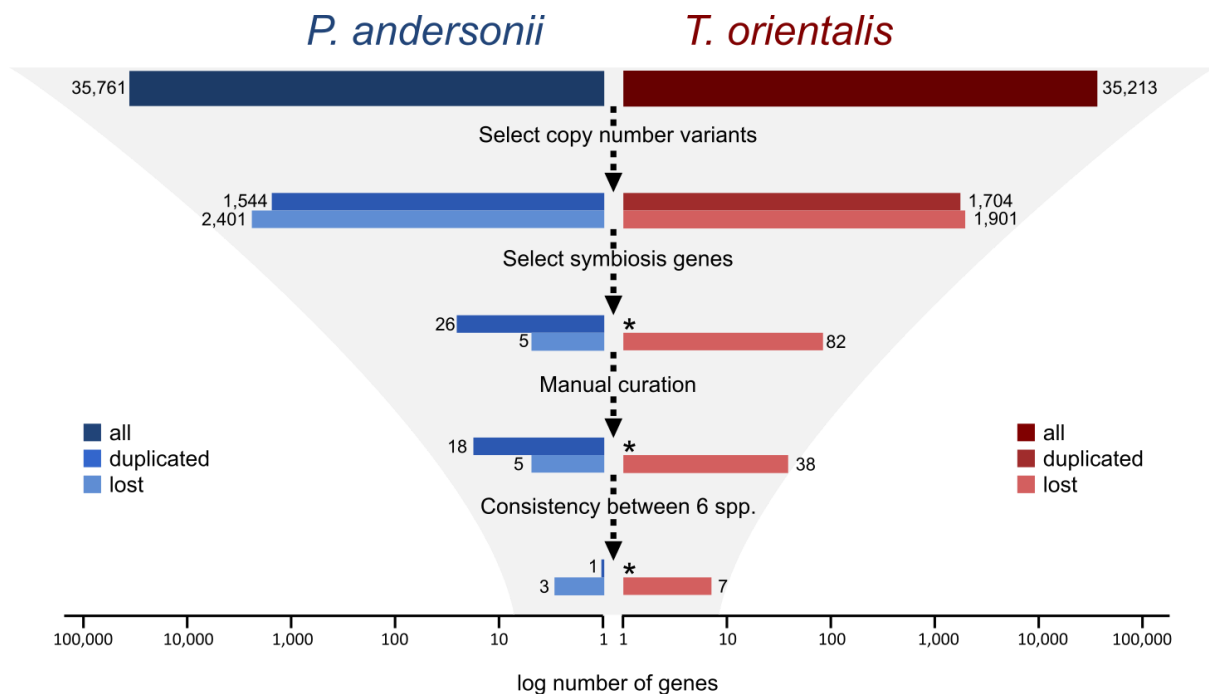

Fig. S15

Filtering steps to establish consistent copy number variants (CNVs) in symbiosis genes. Starting from all annotated gene models, we sequentially i) selected automatically predicted CNVs based on phylogenetic analysis of orthogroups, ii) selected CNVs in 1,817 symbiosis genes, iii) manually curated automatically predicted CNVs using whole-genome alignments between *Parasponia andersonii* and *Trema orientalis*, and iv) selected only those CNVs that were consistent between all sampled *Parasponia* and *Trema* species. \*Note that *Trema*-specific duplications were ignored in the second step because we considered these irrelevant in a symbiotic context.

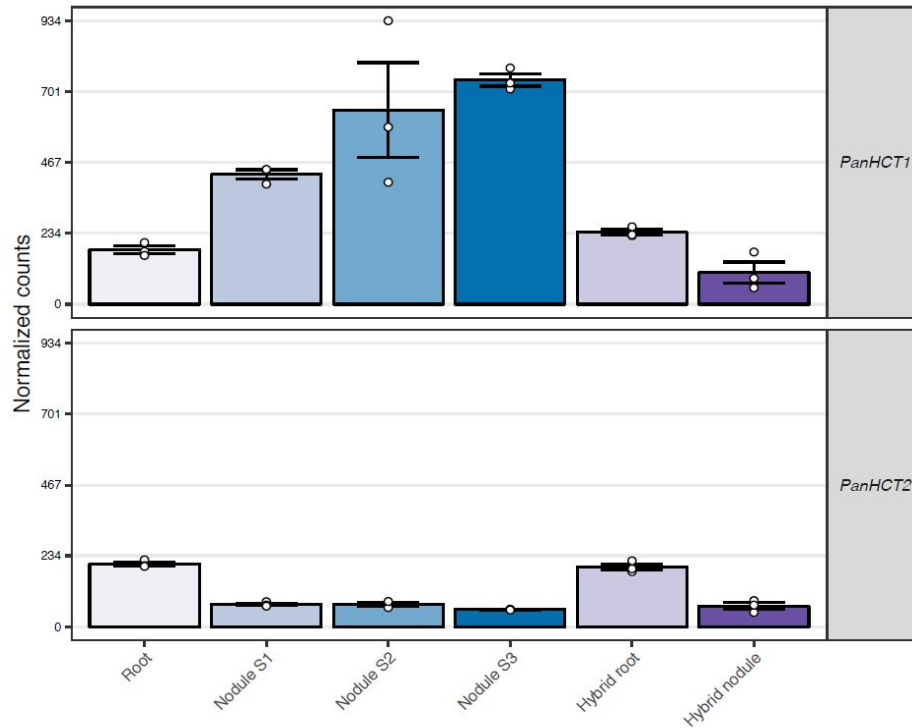

Fig. S16

Expression profile of *PanHCT1* and *PanHCT2* genes. Expression of *Parasponia andersonii* HYDROXYCINNAMOYL-COA SHIKIMATE TRANSFERASE 1 (*PanHCT1*) and *PanHCT2* in *P. andersonii* roots, stage 1-3 nodules, and in *P. andersonii* x *Trema tomentosa* F<sub>1</sub> hybrid roots and nodules (line H9). *PanHCT1* and *PanHCT2* represent the only *Parasponia*-specific gene duplication in the defined symbiosis gene set, as *PanHCT1* is upregulated in nodules. Expression is given in DESeq2 normalized read counts, error bars represent standard error of three biological replicates, dots represent individual expression levels.



*orientalis* RG16 and *T. levigata. PriHCT2* is a putative pseudogene and was not included. HCT1 and HCT2 represent the only *Parasponia* specific gene duplication in the defined symbiosis gene set, as *PanHCT1* was found to be upregulated in nodules. Species included: *Parasponia andersonii* (Pan); *P. rigida* (Pri); *P. rugosa* (Pru) (all in blue); *Trema orientalis* (Tor); *T. orientalis* RG16 (TorRG16); *T. levigata* (Tle) (all in red); *Medicago truncatula* (Mt); *Glycine max* (Glyma), *Prunus persica* (Prupe), *Populus trichocarpa* (Potri); *Fragaria vesca* (Fvesca); *Eucalyptus grandis* (Eugr); *Arabidopsis thaliana* (AT). Node numbers indicate posterior probabilities below 1, scale bar represents substitutions per site.

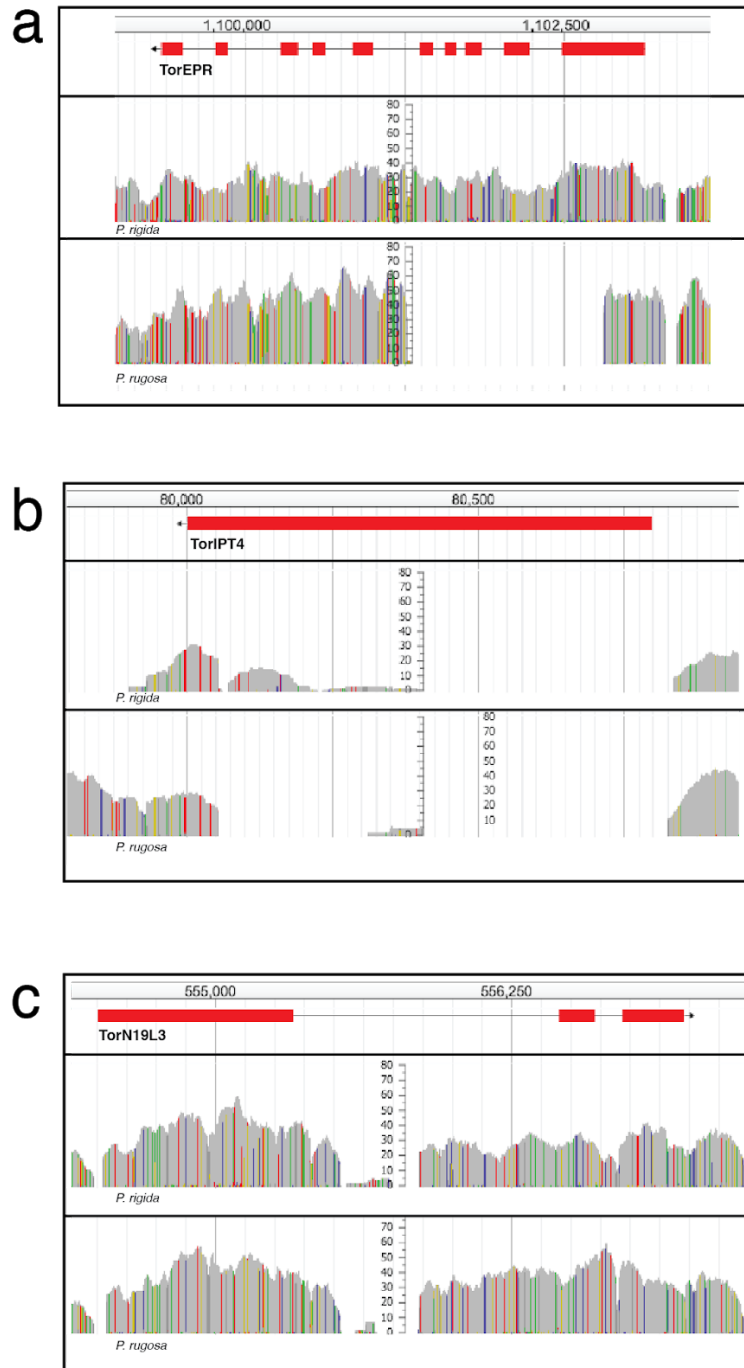

Fig. S18

Read mappings of *Parasponia rigida* and *P. rugosa* to the *Trema orientalis* *EPR*, *IPT4* and *N19L3* genes. Read mappings to genic regions of (a) *TorEPR*, illustrating absence of a large part of the gene in *P. rugosa*. In *P. rigida* *EPR* is a pseudogene due to a single bp insertion causing a frame-shift in the first exon (Fig. S20), (b) *TorIPT4*, illustrating absence of most of the gene in both *P. rigida* and *P. rugosa*, (c) *TorN19L3*, which is a pseudogene in both *P. rigida* and *P. rugosa* due to a large sequence insertion and a 10bp deletion causing frame shifts in the first exon (note that annotated pseudogene sequences are deposited on

GenBank, see Dataset S7 for accession numbers). Coordinates on the x-axis correspond to those of the *T. orientalis* scaffold; red bars depict *T. orientalis* gene models; histograms depict read coverage in grey; nucleotide differences from the *T. orientalis* reference scaffold are in color (green = adenine, blue = cytosine, yellow = guanine, red = thymine).

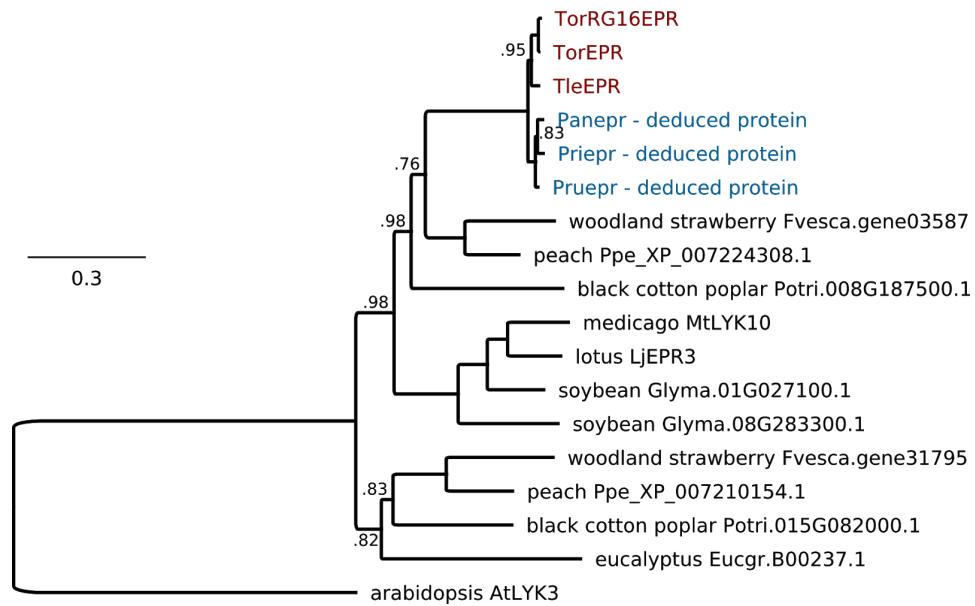

Fig. S19

Phylogenetic reconstruction of the EPR3 orthogroup. Alignment of orthogroup OG0010070 containing exopolysaccharide receptor LjEPR3. Note that all *Parasponia* species lack a functional *EPR* (Fig. S18, S20). Species included: *Trema orientalis* RG33 (Tor); *Trema orientalis* RG16 (TorRG16); *Trema levigata* (Tle) (all in red); *Parasponia Andersonii* (Pan); *Parasponia Rigida* (Pri) *Parasponia Rugosa* (Pru) (all in blue). *Medicago truncatula* (Mt); *Glycine max* (Glyma), *Populus trichocarpa* (Potri); *Fragaria vesca* (Fvesca); *Eucalyptus grandis* (Eugr). Node numbers indicate posterior probabilities below 1, scale bar represents substitutions per site.



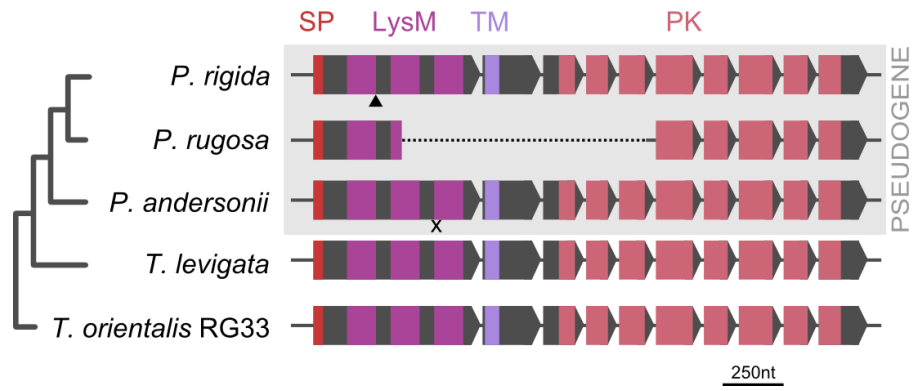

Fig. S20

Independent pseudogenization in *Parasponia* species of *EPR* that is orthologous to the *Lotus japonicus* exopolysaccharide receptor *LjEPR3*. Introns are indicated, but not scaled. X indicates premature stop codon in *P. andersonii epr*, triangle indicate frame-shift in *P. rigida epr*, whereas *P. rugosa epr* contains a large deletion. SP = signal peptide (red); LysM: 3 Lysin Motif domains (magenta); TM = transmembrane domain (lilac); PK = protein kinase (pink).

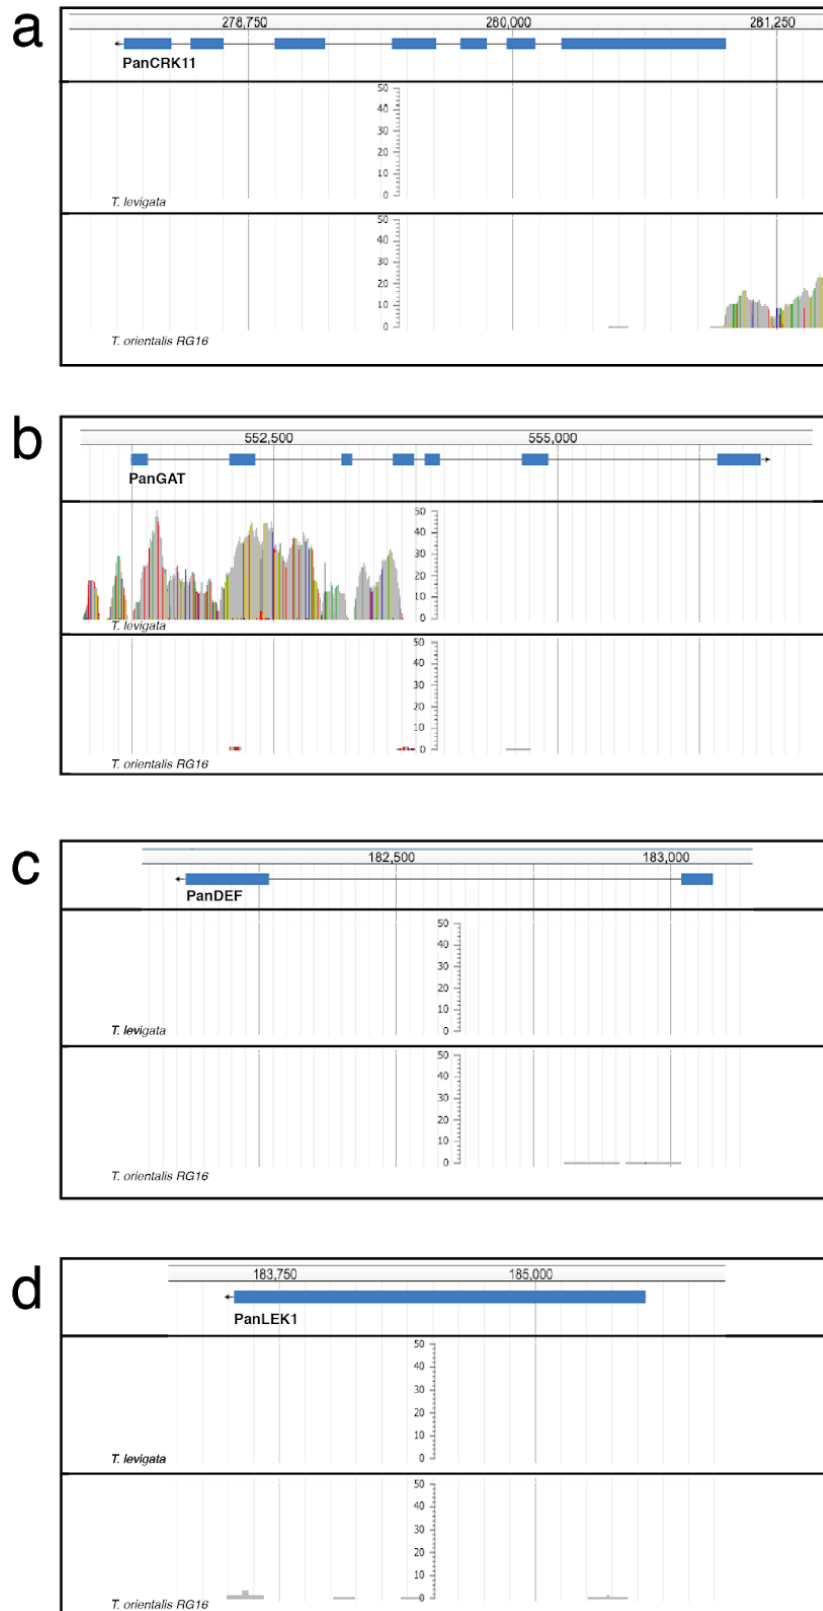

Fig. S21

Read mappings of *Trema orientalis* RG16 and *T. levigata* to the *Parasponia andersonii* *CRK11*, *GAT*, *DEF* and *LEK1* genes. Read mappings to genic regions of (a) *PanCRK11*, illustrating absence of the gene in both *T. levigata* and *T. orientalis* RG16, (b) *PanGAT*,

illustrating absence of most of the gene in *T. levigata* and total absence in *T. orientalis* RG16, (c) *PanDEF*, illustrating absence of the gene in both *T. levigata* and *T. orientalis* RG16. (d) *PanLEK1*, illustrating absence of the gene in both *T. levigata* and *T. orientalis* RG16. Coordinates on the x-axis correspond to those of the *P. andersonii* scaffold; orange bars depict *P. andersonii* gene models; histograms depict read coverage in grey; nucleotide differences from the *P. andersonii* reference scaffold are in color (green = adenine, blue = cytosine, yellow = guanine, red = thymine).

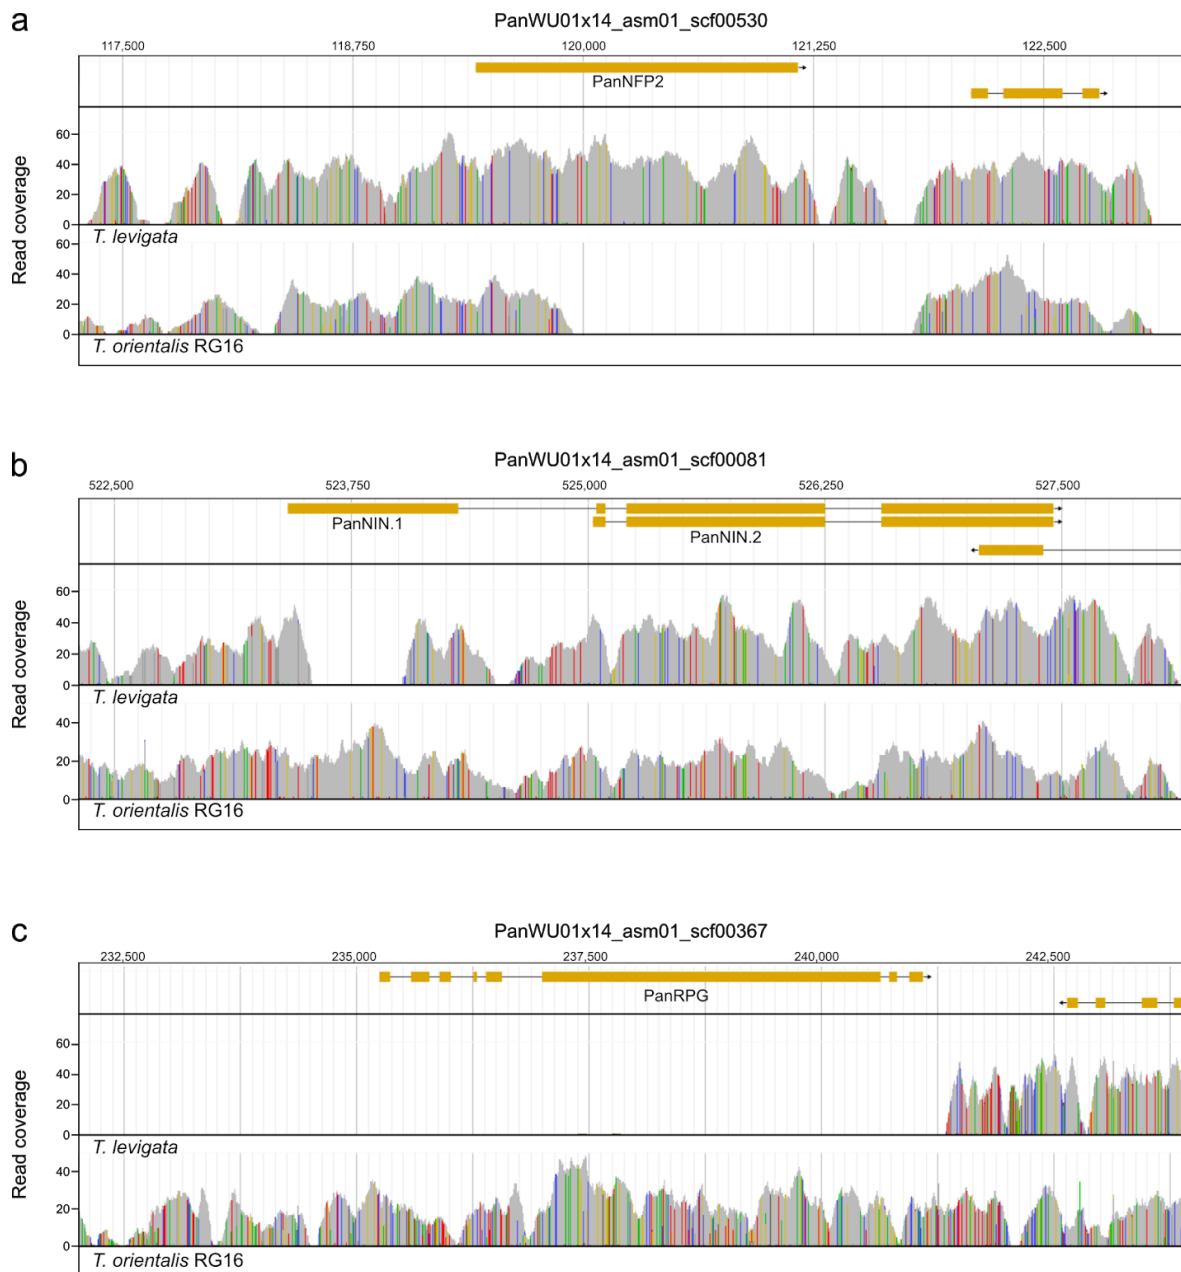

Fig. S22

Read mappings of *Trema orientalis* RG16 and *T. levigata* to the *Parasponia andersonii* *NFP2*, *NIN* and *RPG* genes. Read mappings to genic regions of (a) *PanNFP2*, illustrating absence of a large part of the gene in *T. orientalis* RG16, (b) *PanNIN*, illustrating absence of a large part of the canonical first exon in *T. levigata*, (c) *PanRPG*, illustrating absence of the gene in *T. levigata*. Coordinates on the x-axis correspond to those of the *P. andersonii* scaffold; orange bars depict *P. andersonii* gene models; histograms depict read coverage in grey; nucleotide differences from the *P. andersonii* reference scaffold are in color (green = adenine, blue = cytosine, yellow = guanine, red = thymine).

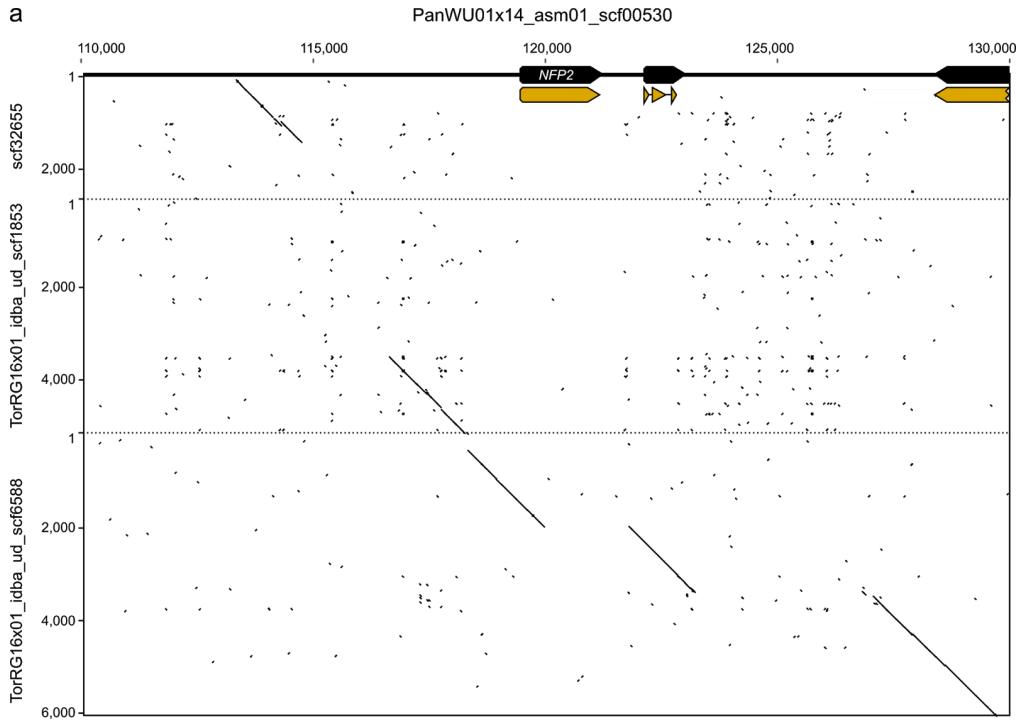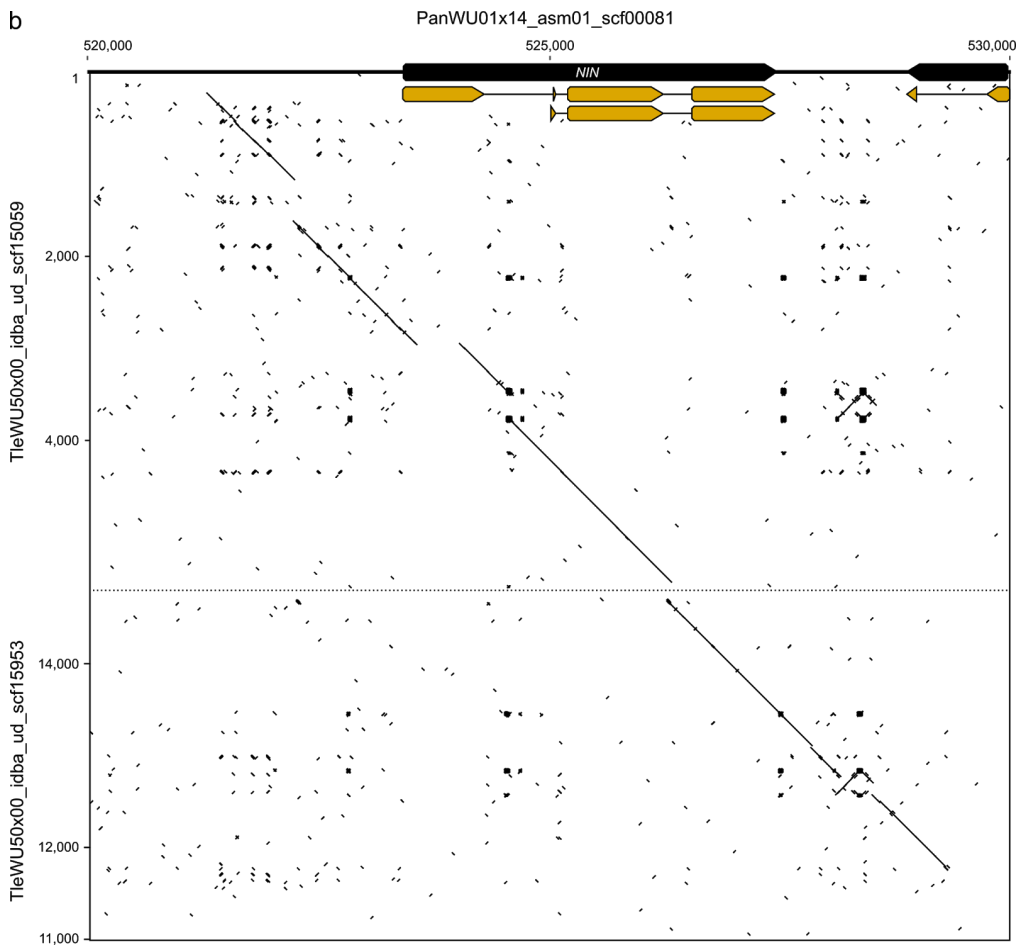

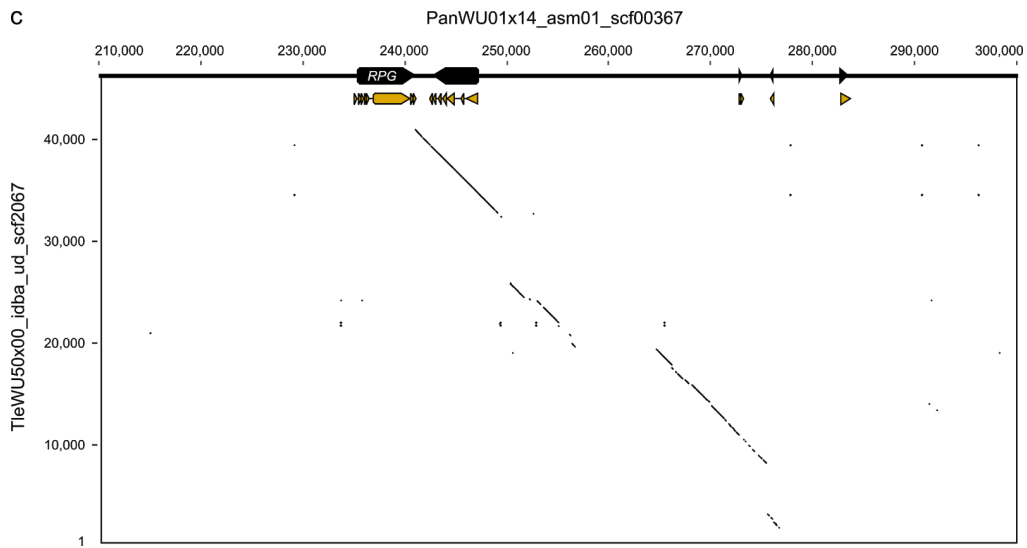

Fig. S23

Genomic alignments of *Trema orientalis* RG16 or *Trema levigata* to *Parasponia andersonii* *NFP2*, *NIN*, and *RPG* gene regions. Genome alignment(s) of (a) *T. orientalis* RG16 with *PanNFP2* gene region, (b) *T. levigata* with *PanNIN* gene region, (c) *T. levigata* with *PanRPG* gene region. Coordinates correspond to those on the draft genome scaffolds; *Parasponia andersonii* gene and CDS models are depicted in black and orange, respectively; different genomic scaffolds are separated by dashed lines. Genomic alignments were performed with the EMBOSS 6.5.7 tool dotmatcher as implemented in the Geneious function dotplot.

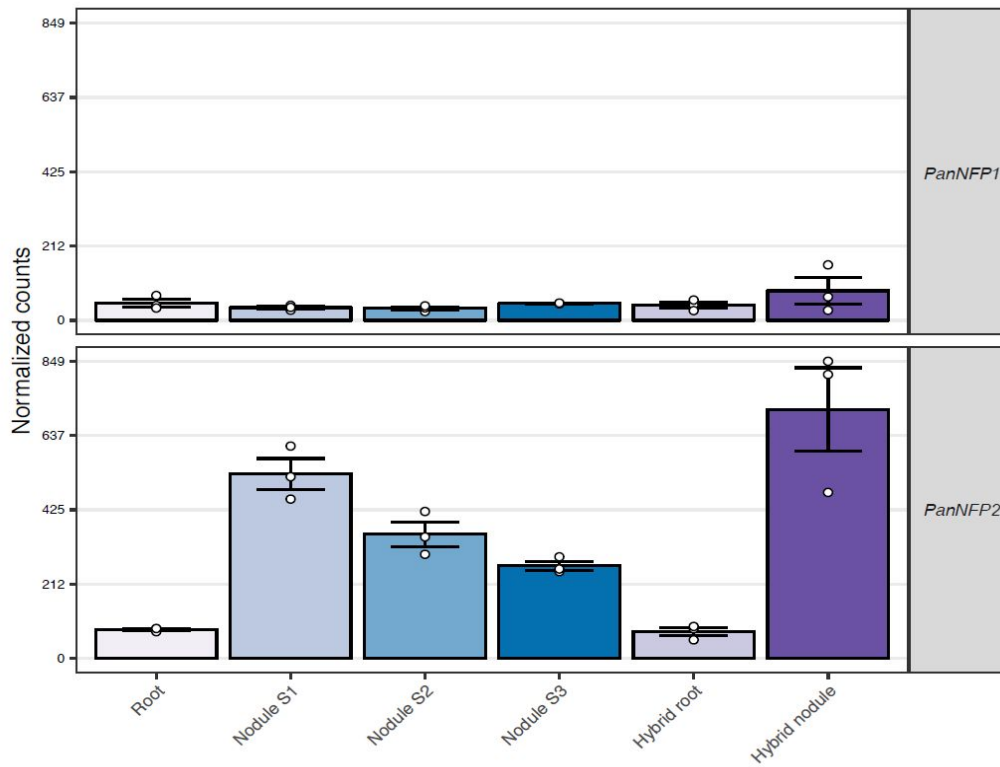

Fig. S24

Expression profile of *PanNFP1* and *PanNFP2* genes. Expression of *P. andersonii* NOD FACTOR PERCEPTION 1 (*PanNFP1*) and *PanNFP2* in *P. andersonii* roots, stage 1-3 nodules, and in *P. andersonii* x *T. tomentos*a F1 hybrid roots and nodules. Expression is given in DESeq2 normalized read counts, error bars represent standard error of three biological replicates, dots represent individual expression levels.

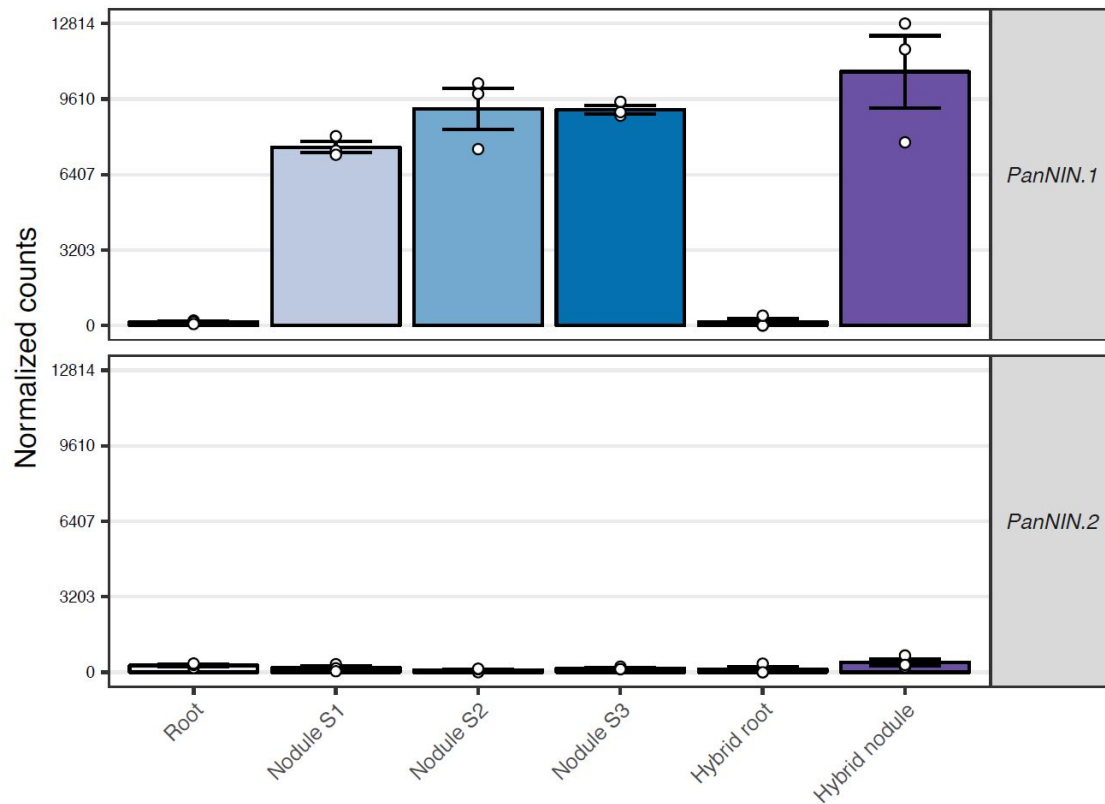

Fig. S25

Expression of *Parasponia andersonii* NODULE INCEPTION (*PanNIN*) gene splice variants. *PanNIN.1* encodes a canonical symbiotic protein, whereas *PanNIN.2* encodes a shorter protein variant that is the result of an alternative start site in an intron. Expression levels were determined by identifying unique DNA sequences for both variants; spanning the intron in case of *PanNIN.1* (CTGCCAAGCGCTTGAGGCTGTTGATCTT), or including the start site of *PanNIN.2* (GCCAATTACCTTGCAGGCTGTTGATCTT) and counting all occurrences in the RNA-seq reads. DESeq2 size factors were used to normalize these counts. The fraction of these normalized counts between *PanNIN.1* and *PanNIN.2* was used to scale the expression levels. Error bars represent standard error of three biological replicates, dots represent individual expression levels.



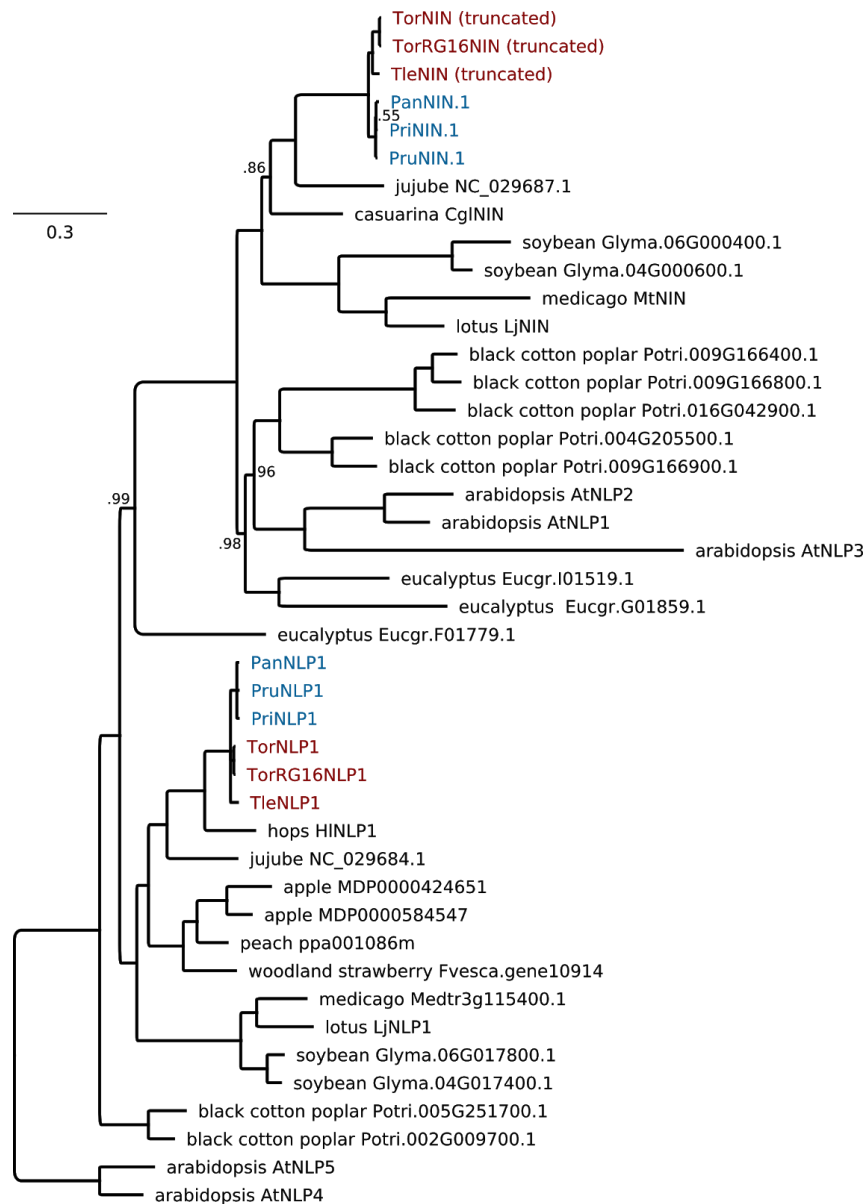

Fig. S26

Phylogenetic reconstruction of NIN orthogroup. Alignment of OG0001118, which includes NIN and NLP1 (NIN-LIKE PROTEIN 1)-like proteins, supplemented with additional species. AtNLP4 and AtNLP5 were included as outgroup. *Parasponia* spp. marked in blue, *Trema* spp. in red. Note that in *Trema* species NIN only occurs in truncated forms (Fig. 6). Included species: *Parasponia andersonii* (Pan); *Parasponia rigida* (Pri); *Parasponia rugosa* (Pru); *Trema orientalis* RG33 (Tor); *Trema orientalis* RG16 (TorRG16); *Trema levigata* (Tle); medicago (*Medicago truncatula*, Mt); lotus (*Lotus japonicus*, Lj); soybean (*Glycine max*, Glyma); peach (*Prunus persica*, ppe); woodland strawberry (*Fragaria vesca*, Fvesca); back cotton poplar (*Populus trichocarpa*, Potri); eucalyptus (*Eucalyptus grandis*, Eugr); arabidopsis (*Arabidopsis thaliana*, At), jujube (*Ziziphus Jujube*) apple (*Malus x domestica*), mulberry (*Morus Notabilis*), hop (*Humulus Lupulus (natsume.shinsuwase.v1.0)*), and

casuarina (*Casuarina glauca*). Node numbers indicate posterior probabilities below 1, scale bar represents substitutions per site.

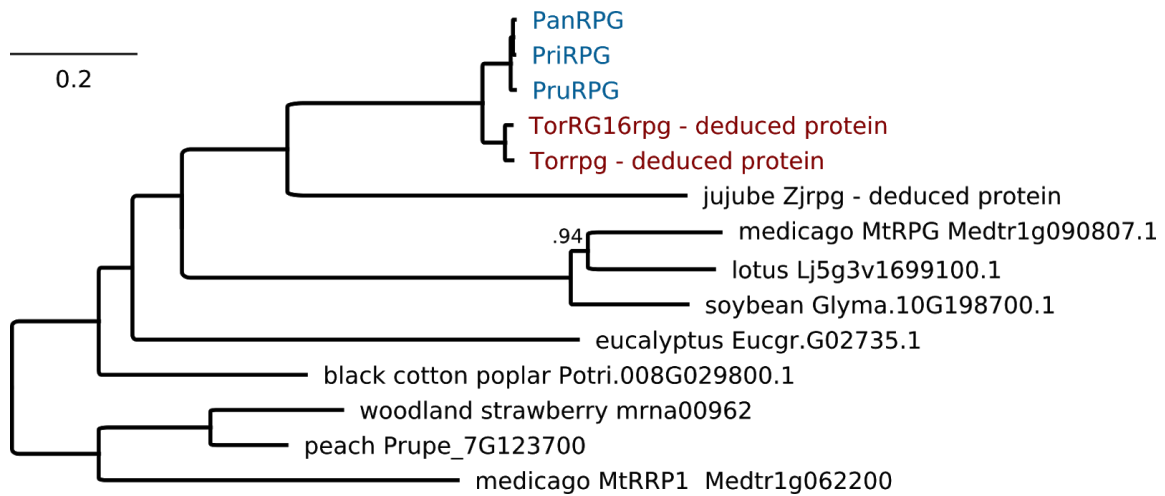

Fig. S27

Phylogenetic reconstruction of the RPG orthogroup. Alignment of OG0014072 was supplemented with RPG homologs of additional species. Included species: *Parasponia andersonii* (Pan) *Parasponia rigida* (Pri); *Parasponia rugosa* (Pru) *Medicago truncatula* (Mt); *Lotus japonicus* (Lj); *Glycine max* (Glyma), *Populus trichocarpa* (Potri); *Eucalyptus grandis* (Eugr). *Trema orientalis* RG33 (Tor); *Trema. orientalis* RG16 (TorRG16). *Ziziphus jujube* (Zj). No other functional RPG proteins could be detected in Rosales species, including *Fragaria vesca* *Ziziphus Jujube*, *Malus Domestica*, *Morus Notabilis*, and *Humulus Lupulus* (*natsume.shinsuwase.v1.0*). Outgroup: *M. truncatula* MtRRP1 (RPG RELATED PROTEIN 1, Medtr1g062200.1). Node numbers indicate posterior probabilities below 1, scale bar represents substitutions per site.

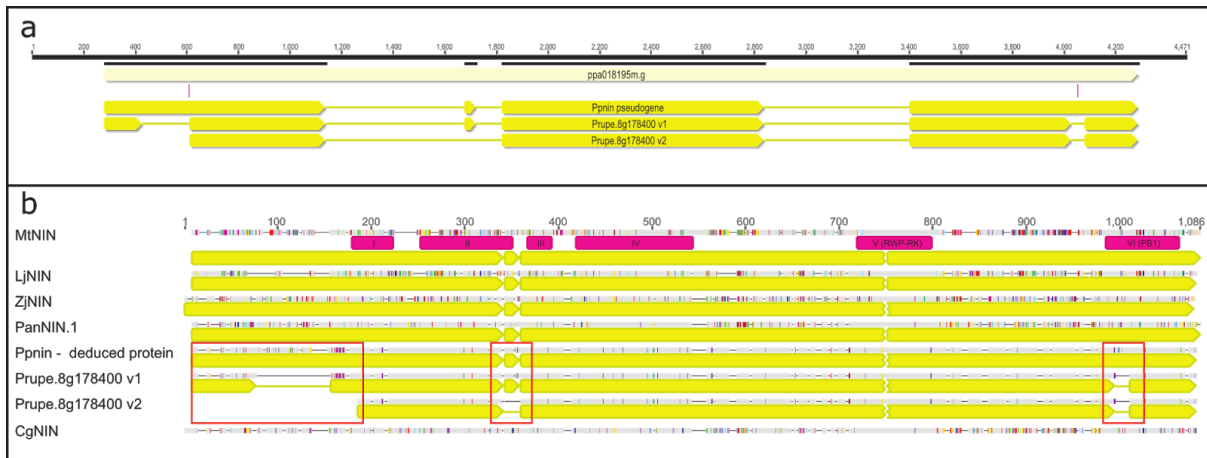

Fig. S28

Annotation of *Prunus persica* locus ppa018195m.g representing *PpNIN*. **a** Comparison of the exon-intron structure of two publicly released gene models (named Prupe.8g17800\_v1 and Prupe.8g178400\_v2) and the gene model used here (*Ppnin* pseudogene). Yellow arrows: exons. Red bars indicate 2 single-nucleotide insertions that affect the coding region of the *Ppnin* pseudogene. **b** Alignment of derived/deduced NIN proteins of 3 *Prunus persica* gene models Prupe.8g17800\_v1, Prupe.8g178400\_v2, and *Ppnin* pseudogene, with *Medicago truncatula* MtNIN, *Lotus japonicus* LjNIN, *Ziziphus jujube* ZjNIN, *Parasponia andersonii* PanNIN.1, and *Casuarina glauca* CgNIN. Six conserved domains are annotated in MtNIN (cyan). Exon structure for all NIN genes indicated in yellow (except CgNIN for which no gene sequence is available). Deviations in the three *Prunus persica* derived/deduced NIN proteins are marked in red boxes.

## Supplementary tables

Table S1

Intergeneric crossings between *Parasponia* and *Trema* species.

| Maternal parent           | Paternal parent           | Result   |
|---------------------------|---------------------------|----------|
| <i>P. andersonii</i>      | <i>T. tomentosa</i>       | positive |
| <i>P. andersonii</i>      | <i>T. orientalis</i> RG33 | negative |
| <i>P. andersonii</i>      | <i>T. levigata</i>        | negative |
| <i>P. rigida</i>          | <i>T. tomentosa</i>       | negative |
| <i>P. rigida</i>          | <i>T. orientalis</i> RG33 | negative |
| <i>T. orientalis</i> RG33 | <i>P. andersonii</i>      | negative |

Result column indicates whether intergeneric crosses could be obtained (positive) or not (negative).

Table S2

*Parasponia-Trema* germplasm collection.

| Species              | Accession  | Chromosome number | Estimated genome size |                 | Origin           | NCBI bioproject |
|----------------------|------------|-------------------|-----------------------|-----------------|------------------|-----------------|
|                      |            |                   | flow cytometry        | k-mers          |                  |                 |
| <i>P. andersonii</i> | PanWU01x14 | 2n=2x=20          | 551                   | 563 (536-591)   | Papua New Guinea | PRJNA272473     |
| <i>P. rigida</i>     | PriWU20x00 | n.d.              | 521                   | 573 (549-600)   | Papua New Guinea | PRJNA272486     |
| <i>P. rugosa</i>     | PruLW88x56 | n.d.              | n.d.                  | 498 (478-520)   | Philippines      | PRJNA272880     |
| <i>T. orientalis</i> | RG6        | n.d.              | 1,931                 | n.d.            | Malaysia: Borneo | n.a.            |
| <i>T. orientalis</i> | RG16       | n.d.              | 483                   | 488 (458-521)   | Malaysia: Borneo | PRJNA272878     |
| <i>T. orientalis</i> | RG19       | n.d.              | 488                   | 629 (560-717)   | Malaysia: Borneo | n.a.            |
| <i>T. orientalis</i> | RG21       | n.d.              | 677                   | n.d.            | Malaysia: Borneo | n.a.            |
| <i>T. orientalis</i> | RG25       | n.d.              | 508                   | n.d.            | Malaysia: Borneo | n.a.            |
| <i>T. orientalis</i> | RG26       | n.d.              | 296                   | n.d.            | Malaysia: Borneo | n.a.            |
| <i>T. orientalis</i> | RG32       | n.d.              | 593                   | n.d.            | Malaysia: Borneo | n.a.            |
| <i>T. orientalis</i> | RG33       | n.d.              | 501                   | 506 (472-545)   | Malaysia: Borneo | PRJNA272482     |
| <i>T. orientalis</i> | RG35       | n.d.              | 593                   | n.d.            | Malaysia: Borneo | n.a.            |
| <i>T. orientalis</i> | RG43       | n.d.              | 2,286                 | n.d.            | Malaysia: Borneo | n.a.            |
| <i>T. orientalis</i> | RG44       | n.d.              | 593                   | n.d.            | Malaysia: Borneo | n.a.            |
| <i>T. orientalis</i> | RG45       | n.d.              | 508                   | n.d.            | Malaysia: Borneo | n.a.            |
| <i>T. orientalis</i> | RG46       | n.d.              | 423                   | n.d.            | Malaysia: Borneo | n.a.            |
| <i>T. orientalis</i> | RG47       | n.d.              | 1,016                 | n.d.            | Malaysia: Borneo | n.a.            |
| <i>T. orientalis</i> | RG48       | n.d.              | 508                   | n.d.            | Malaysia: Borneo | n.a.            |
| <i>T. orientalis</i> | RG51       | n.d.              | 1,524                 | n.d.            | Malaysia: Borneo | n.a.            |
| <i>T. orientalis</i> | WU30       | n.d.              | n.d.                  | n.d.            | Australia        | n.a.            |
| <i>T. levigata</i>   | TleWU50x00 | n.d.              | 271                   | 375 (363-388)   | China            | PRJNA38059      |
| <i>T. tomentosa</i>  | TtoWU10x00 | 2n=4x=40          | 910                   | 997 (919-1,090) | Australia        | PRJNA388567     |

Note that we consider estimated genome sizes based on flow cytometry as less reliable than those based on

k-mer analysis. n.d. = not determined, n.a. = not available.

Table S3

Genome size estimations based on estimated genome coverage.

| <b>Genome</b>             | <b>Total kmers</b> | <b>Error-free kmers</b> | <b>Error threshold</b> | <b>Peak multiplicity</b> | <b>Estimated coverage</b> | <b>Estimated genome size (Mb)</b> |
|---------------------------|--------------------|-------------------------|------------------------|--------------------------|---------------------------|-----------------------------------|
| <i>P. andersonii</i>      | 11,991,734,213     | 11,588,276,008          | 5                      | 21                       | 20.6                      | 563                               |
| <i>P. rigida</i>          | 13,365,390,696     | 13,070,993,890          | 5                      | 23                       | 22.8                      | 573                               |
| <i>P. rugosa</i>          | 12,031,642,877     | 11,861,824,695          | 4                      | 24                       | 23.8                      | 498                               |
| <i>T. levigata</i>        | 11,734,970,688     | 11,483,093,120          | 5                      | 31                       | 30.6                      | 375                               |
| <i>T. orientalis</i> RG16 | 7,681,138,750      | 7,558,426,418           | 3                      | 15                       | 15.5                      | 488                               |
| <i>T. orientalis</i> RG19 | 5,158,370,893      | 5,092,882,606           | 2                      | 8                        | 8.1                       | 629                               |
| <i>T. orientalis</i> RG33 | 7,144,168,594      | 7,031,752,162           | 3                      | 14                       | 13.9                      | 506                               |
| <i>T. tomentosa</i>       | 11,856,769,186     | 11,767,550,254          | 2                      | 12                       | 11.8                      | 997                               |

Table S4

Genome sequencing strategy.

| Species                   | Platform | Library type | Exp. insert size (bp) | Read length (bp) | SRA accession | Raw (Gb) | Clean (Gb) | Est. av. cov. | Mapped (%) | Properly paired (%) | Median insert size |
|---------------------------|----------|--------------|-----------------------|------------------|---------------|----------|------------|---------------|------------|---------------------|--------------------|
| <i>P. andersonii</i>      | MiSeq    | pe           | 400                   | 250              | SRR5457665    | 7,287    | 6,470      | 11            | 97.52      | 82.34               | 456                |
| <i>P. andersonii</i>      | MiSeq    | pe           | 400                   | 250              | SRR5457666    | 6,982    | 6,244      | 11            | 97.72      | 82.30               | 457                |
| <i>P. andersonii</i>      | MiSeq    | pe           | 400                   | 250              | SRR5457667    | 3,603    | 3,208      | 6             | 97.56      | 82.34               | 458                |
| <i>P. andersonii</i>      | HiSeq    | pe           | 500                   | 100              | SRR5457668    | 13,161   | 10,837     | 19            | 91.75      | 83.58               | 254                |
| <i>P. andersonii</i>      | HiSeq    | pe           | 500                   | 100              | SRR5457669    | 4,430    | 3,324      | 6             | 90.54      | 83.61               | 246                |
| <i>P. andersonii</i>      | HiSeq    | mp           | 3,000                 | 100              | SRR5457672    | 12,662   | 6,065      | 11            | 95.32      | 81.05               | 3,676              |
| <i>P. andersonii</i>      | HiSeq    | mp           | 7,000                 | 100              | SRR5457671    | 17,207   | 7,886      | 14            | 95.45      | 79.08               | 6,186              |
| <i>P. andersonii</i>      | HiSeq    | mp           | 10,000                | 100              | SRR5457670    | 9,461    | 4,553      | 8             | 96.25      | 62.96               | 10,412             |
| <i>T. orientalis</i> RG33 | MiSeq    | pe           | 400                   | 250              | SRR5464169    | 5,455    | 4,687      | 9             | 95.99      | 82.66               | 481                |
| <i>T. orientalis</i> RG33 | MiSeq    | pe           | 400                   | 250              | SRR5464170    | 6,616    | 5,721      | 11            | 97.66      | 85.14               | 482                |
| <i>T. orientalis</i> RG33 | MiSeq    | pe           | 400                   | 250              | SRR5464171    | 2,465    | 2,108      | 4             | 97.34      | 85.11               | 482                |
| <i>T. orientalis</i> RG33 | HiSeq    | pe           | 500                   | 100              | SRR5464172    | 9,950    | 8,638      | 17            | 96.50      | 92.87               | 243                |
| <i>T. orientalis</i> RG33 | HiSeq    | mp           | 3,000                 | 100              | SRR5464176    | 6,576    | 2,931      | 6             | 98.08      | 81.89               | 3,169              |
| <i>T. orientalis</i> RG33 | HiSeq    | mp           | 3,000                 | 100              | SRR5464175    | 6,645    | 3,117      | 6             | 98.11      | 82.12               | 3,172              |
| <i>T. orientalis</i> RG33 | HiSeq    | mp           | 7,000                 | 100              | SRR5464173    | 7,060    | 3,282      | 6             | 97.64      | 78.93               | 5,633              |
| <i>T. orientalis</i> RG33 | HiSeq    | mp           | 7,000                 | 100              | SRR5464174    | 7,130    | 3,501      | 7             | 97.67      | 78.90               | 5,635              |
| <i>T. orientalis</i> RG33 | HiSeq    | mp           | 10,000                | 100              | SRR5464178    | 4,479    | 2,043      | 4             | 98.56      | 72.06               | 9,204              |
| <i>T. orientalis</i> RG33 | HiSeq    | mp           | 10,000                | 100              | SRR5464177    | 4,505    | 2,279      | 5             | 98.58      | 72.03               | 9,211              |
| <i>P. rigida</i>          | HiSeq    | pe           | 500                   | 100              | SRR5626387    | 14,263   | 13,147     | 23            | 99.79      | 89.35               | 253                |
| <i>P. rigida</i>          | HiSeq    | pe           | 500                   | 100              | SRR5626388    | 4,723    | 3,931      | 7             | 99.76      | 90.81               | 245                |
| <i>P. rugosa</i>          | HiSeq    | pe           | 500                   | 100              | SRR5631337    | 16,141   | 15,726     | 32            | 99.95      | 83.60               | 480                |
| <i>T. orientalis</i> RG16 | HiSeq    | pe           | 500                   | 100              | SRR5674478    | 11,009   | 9,862      | 20            | 99.89      | 88.52               | 243                |
| <i>T. levigata</i>        | HiSeq    | pe           | 500                   | 100              | SRR5631617    | 16,119   | 15,483     | 41            | 99.91      | 86.85               | 467                |
| <i>T. tomentosa</i>       | HiSeq    | pe           | 500                   | 100              | SRR5679053    | 8,130    | 8,018      | 8             | 99.51      | 68.59               | 481                |
| <i>T. tomentosa</i>       | HiSeq    | pe           | 500                   | 100              | SRR5679052    | 7,678    | 7,574      | 8             | 99.50      | 67.89               | 481                |

pe = paired end, mp = mate pair, Exp. = expected, Est. av. cov. = estimated average coverage.



Table S5

Assembly results of *Parasponia* and *Trema* genome sequences.

|                     | <i>P. andersonii</i> | <i>P. rigida</i> | <i>P. rugosa</i> | <i>T. orientalis</i><br>RG33 | <i>T. orientalis</i> RG16 | <i>T. levigata</i> |       |
|---------------------|----------------------|------------------|------------------|------------------------------|---------------------------|--------------------|-------|
| Assembly size (bp)  | 475,834,238          | 473,976,781      | 440,853,656      | 387,958,189                  | 391,454,457               | 350,420,318        |       |
| # N                 | 24,563,530           | 14,507           | 340,003          | 18,061,089                   | 12,092                    | 501,912            |       |
| # scaffolds         | 2,732                | 213,690          | 199,834          | 2,756                        | 182,478                   | 190,006            |       |
| N50 length (bp)     | 712,846              | 12,913           | 12,790           | 656,203                      | 8,006                     | 14,367             |       |
| N50 index           | 193                  | 9,257            | 9,637            | 157                          | 12,384                    | 6,875              |       |
| N95 length (bp)     | 101,596              | 464              | 397              | 76,336                       | 461                       | 320                |       |
| N95 index           | 828                  | 116,579          | 87,938           | 809                          | 110,056                   | 73,056             |       |
| Min seq length (bp) | 501                  | 100              | 100              | 501                          | 100                       | 100                |       |
| Max seq length (bp) | 4,735,547            | 173,338          | 128,802          | 5,284,217                    | 94,643                    | 117,780            |       |
| GC (%)              | 34.4                 | 34.3             | 34.2             | 33.3                         | 33.3                      | 33.2               |       |
| BUSCO               | %complete            | 95.42            | 92.01            | 90.69                        | 95.00                     | 87.71              | 89.44 |
|                     | %fragmented          | 0.83             | 3.19             | 3.96                         | 1.39                      | 6.46               | 5.21  |
|                     | %missing             | 3.75             | 4.79             | 5.35                         | 3.61                      | 5.83               | 5.35  |
| CEGMA               | %complete            | 91.1             | 87.1             | 87.5                         | 90.7                      | 85.5               | 88.7  |
|                     | %partial             | 97.6             | 97.2             | 97.2                         | 97.2                      | 96.4               | 97.6  |

For BUSCO a set of 1,440 plant-specific genes was used. #N = number of gap sequences, GC% = guanine-cytosine content.

Table S6

Gene models in *Parasponia andersonii* and *Trema orientalis* RG33 reference genomes.

|                   | <i>P. andersonii</i> | <i>T. orientalis</i> RG33 |
|-------------------|----------------------|---------------------------|
| Total gene models | 35,761               | 35,213                    |
| in orthogroups    | 29,393               | 29,958                    |
| orthologous pairs | 25,605               | 25,605                    |
| inparalogs        | 1,544                | 1,704                     |
| singletons        | 1,901                | 2,401                     |
| multi-orthologs   | 343                  | 248                       |
| total CNVs        | 3,445                | 4,105                     |
| BUSCO complete    | 93.30%               | 92.80%                    |
| BUSCO fragmented  | 3.80%                | 4.10%                     |
| BUSCO missing     | 2.90%                | 3.10%                     |

Inparalogs = species specific duplications, singletons = loss of gene in other species, multi-orthologs = duplication in the other species, CNVs = copy number variants. We found no significant enrichment of total CNVs in the symbiosis genes (hypergeometric test,  $p = 0.99$ ). For BUSCO a set of 1,440 plant specific genes was used.

Table S7.

Copy number variants in symbiosis genes that are consistent between *Parasponia* and *Trema* genera.

| Name            | Gene ID           | CNV type                         | Class | Description                                                                           |
|-----------------|-------------------|----------------------------------|-------|---------------------------------------------------------------------------------------|
| <i>PanNFP2</i>  | PanWU01x14_320250 | loss in <i>Trema</i>             | LS,NE | LysM domain containing receptor kinase, putative rhizobium LCO receptor               |
| <i>PanCRK11</i> | PanWU01x14_285030 | loss in <i>Trema</i>             | NE    | Cysteine rich receptor like kinase                                                    |
| <i>PanLEK1</i>  | PanWU01x14_069780 | loss in <i>Trema</i>             | NE    | Concanavalin A-like lectin receptor kinase                                            |
| <i>PanNIN</i>   | PanWU01x14_111140 | loss in <i>Trema</i>             | LS,CR | Ortholog of transcription factor NODULE INCEPTION                                     |
| <i>PanRPG</i>   | PanWU01x14_272380 | loss in <i>Trema</i>             | LS,CR | Ortholog of long coiled-coil protein RHIZOBIUM-DIRECTED POLAR GROWTH                  |
| <i>PanDEF1</i>  | PanWU01x14_187760 | loss in <i>Trema</i>             | NE    | Defensin-like protein                                                                 |
| <i>PanGAT</i>   | PanWU01x14_150960 | loss in <i>Trema</i>             | NE    | Gamma-aminobutyric acid (GABA) transporter                                            |
| <i>PanHCT1</i>  | PanWU01x14_046570 | duplication in <i>Parasponia</i> | NE    | Hydroxycinnamoyl-CoA shikimate / Quinate hydroxycinnamoyl transferase                 |
| <i>TorEPR</i>   | TorRG33x02_052550 | loss in <i>Parasponia</i>        | LS    | LysM domain containing receptor kinase, putative rhizobium exopolysaccharide receptor |
| <i>TorN19L3</i> | TorRG33x02_066920 | loss in <i>Parasponia</i>        | LS    | NODULIN19-like protein                                                                |
| <i>TorIPT4</i>  | TorRG33x02_307000 | loss in <i>Parasponia</i>        | LS    | Isopentenyltransferase                                                                |

Gene ID corresponds to that in *P. andersonii*, or *T. orientalis* in case of gene loss in *Parasponia* species. LS: putative ortholog of legume genes that function in symbiosis (Dataset S1), NE: nodule enhanced expression in *P. andersonii* (Dataset S4), CR: genes that are commonly utilized in *P. andersonii* and medicago (Dataset S5). Expression profiles of the *P. andersonii* genes are depicted in Fig. 4.

Table S8

Sequenced RNA samples.

| Species                   | Description                        | Used in annotation | SRA accession | Mapped (%) | Properly paired (%) |
|---------------------------|------------------------------------|--------------------|---------------|------------|---------------------|
| <i>P. andersonii</i>      | leaves                             | yes                | SRR5631161    | 96         | 93.5                |
| <i>P. andersonii</i>      | stems                              | yes                | SRR5631160    | 95.7       | 93.3                |
| <i>P. andersonii</i>      | female flowers                     | yes                | SRR5631163    | 95.6       | 93                  |
| <i>P. andersonii</i>      | male flowers                       | yes                | SRR5631162    | 95.1       | 92.2                |
| <i>P. andersonii</i>      | young berries                      | yes                | SRR5631157    | 95.5       | 92.7                |
| <i>P. andersonii</i>      | uninoculated root                  | no                 | SRR5631165    | 91.44      | 88.34               |
| <i>P. andersonii</i>      | uninoculated root                  | no                 | SRR5631166    | 91.72      | 88.36               |
| <i>P. andersonii</i>      | uninoculated root                  | no                 | SRR5631164    | 91.32      | 88.26               |
| <i>P. andersonii</i>      | nodule stage 1 M. plurifarium BOR2 | no                 | SRR5631152    | 86.45      | 83.78               |
| <i>P. andersonii</i>      | nodule stage 1 M. plurifarium BOR2 | no                 | SRR5631151    | 79.63      | 76.96               |
| <i>P. andersonii</i>      | nodule stage 1 M. plurifarium BOR2 | no                 | SRR5631150    | 90.7       | 87.78               |
| <i>P. andersonii</i>      | nodule stage 2 M. plurifarium BOR2 | no                 | SRR5631149    | 93.01      | 90                  |
| <i>P. andersonii</i>      | nodule stage 2 M. plurifarium BOR2 | no                 | SRR5631148    | 93.9       | 90.61               |
| <i>P. andersonii</i>      | nodule stage 2 M. plurifarium BOR2 | no                 | SRR5631147    | 91.4       | 88.48               |
| <i>P. andersonii</i>      | nodule stage 3 M. plurifarium BOR2 | no                 | SRR5631146    | 92.31      | 88.79               |
| <i>P. andersonii</i>      | nodule stage 3 M. plurifarium BOR2 | no                 | SRR5631145    | 75.34      | 66.26               |
| <i>P. andersonii</i>      | nodule stage 3 M. plurifarium BOR2 | no                 | SRR5631144    | 85.65      | 80.71               |
| <i>P. andersonii</i>      | lateral root primordia             | yes                | SRR5631155    | 100        | 87.83               |
| <i>P. andersonii</i>      | lateral root primordia             | yes                | SRR5631154    | 100        | 88.38               |
| <i>P. andersonii</i>      | lateral root primordia             | yes                | SRR5631153    | 100        | 77.92               |
| <i>P. andersonii</i>      | 2 cm of root tip.                  | yes                | SRR5631156    | 100        | 73.97               |
| <i>P. andersonii</i>      | 2 cm of root tip.                  | yes                | SRR5631159    | 100        | 81.04               |
| <i>P. andersonii</i>      | 2 cm of root tip.                  | yes                | SRR5631158    | 100        | 75.5                |
| <i>T. orientalis</i> RG33 | lateral root primordia             | yes                | SRR5681931    | 100        | 74.77               |
| <i>T. orientalis</i> RG33 | lateral root primordia             | yes                | SRR5681932    | 100        | 75.46               |
| <i>T. orientalis</i> RG33 | 2 cm of root tip.                  | yes                | SRR5681933    | 100        | 83.58               |
| <i>T. orientalis</i> RG33 | 2 cm of root tip.                  | yes                | SRR5681934    | 100        | 84.8                |
| <i>T. orientalis</i> RG33 | 2 cm of root tip.                  | yes                | SRR5681930    | 100        | 77.61               |
| Hybrid                    | uninoculated hybrid root           | no                 | SRR5641455    | 84.54      | 78.97               |
| Hybrid                    | uninoculated hybrid root           | no                 | SRR5641456    | 83.47      | 77.73               |
| Hybrid                    | uninoculated hybrid root           | no                 | SRR5641457    | 84.7       | 78.63               |
| Hybrid                    | hybrid nodule M. plurifarium BOR2  | no                 | SRR5641458    | 86.8       | 81.28               |
| Hybrid                    | hybrid nodule M. plurifarium BOR2  | no                 | SRR5641459    | 76.45      | 70.65               |
| Hybrid                    | hybrid nodule M. plurifarium BOR2  | no                 | SRR5641460    | 75.94      | 70.29               |

# Supplementary methods

## Seed germination

*Parasponia* and *Trema* seeds were surface sterilized in 4% sodium hypochlorite containing 0.02% (v:v) Tween20, and rinsed thoroughly with sterile water. Sterilized seeds were subjected to 6 temperature cycles (11h 28°C, 6h 4°C) to induce germination. Germinating seeds were transferred to sterile 1.0% agar plates and grown at 28°C with a photoperiod of 16 day and 8h night.

## Arbuscular mycorrhization assay

Two week old seedlings were transferred to 800 ml Sand:Granule:*Rhizophagus irregularis* (*Rir*, INOQ TOP- INOQ GmbH, Schnega Germany) inoculum mixture (1:1:0.01), irrigated with 80 ml ½ strength modified Hoagland solution containing 20 µM K<sub>2</sub>HPO<sub>4</sub> (1) and grown for an additional 6 weeks at 28°C, under a photoperiod of 16/8h (day/night). 50 ml additional nutrient solution was provided once a week. Mycorrhization efficiency was analysed as previously described (2) for three aspects: 1) frequency of fungal colonization in 1 cm root segments; 2) average level of mycorrhization in all root fragments, and 3) arbuscular abundance in all root fragments (Additional file 2: Fig. S1). Arbuscules were WGA-Alexafluor 488-stained and imaged according to Huisman *et al* 2015 (3).

## Nodulation assay

All nodulation assays were conducted with *Mesorhizobium plurifarium* BOR2. This strain was isolated from *P. andersonii* root nodules grown in soil samples collected from the root rhizosphere of *Trema orientalis* plants in Malaysian Borneo, province of Sabah (4). *M. plurifarium* was grown on yeast extract mannitol medium at 28°C (5). Plants were grown in sterile plastic 1 liter pots containing perlite and EKM medium supplemented with 0.375 mM NH<sub>4</sub>NO<sub>3</sub> and rhizobium (OD600:0.05) (6). Nodule number per plant was quantified 6 weeks post inoculation.

To isolate *P. andersonii* nodules at 3 developmental stages nodules were separated based on morphology and size. Stage 1: nodules are round and < 1mm in diameter in size. The outer cell layers of stage 1 nodules are transparent. Light microscopy confirmed that at this stage, rhizobia already reach the central part of the nodule, but are mainly present in the apoplast (Fig. 1h). Stage 2: nodules are brownish, and ~2 mm in size. Nodules have formed an apical meristem and 2-3 cell layers have been infected by rhizobia (Fig. 1i). Stage 3:

nodules are pinkish on the outside due to an accumulation of hemoglobin and > 2 mm in size. Light microscopy showed that stage 3 nodules contain zones of fully infected cells (Fig. 1j). For each of these stages, three biological replicates were used for RNA sequencing.

### **Acetylene reduction assays (ARA)**

Acetylene reduction assays (7) were conducted on nodules harvested 6 weeks post inoculation with *Mesorhizobium plurifarium* strain BOR2. Nodules were sampled per plant and collected in 15 ml headspace vials with screw lids. 2.5 ml of acetylene was injected into the vial and incubated for about 10 minutes, after which 1 ml headspace was used to quantify ethylene nitrogenase activity using an ETD 300 detector (Sensor Sense, Nijmegen, The Netherlands; Isogen, Wageningen, The Netherlands) (8).

### **Microscopy**

Tissue fixation and embedding were done as described by Fedorova et al. 1999 (9). Semi-thin (0.6 µm) sections were cut using a Leica Ultracut microtome and examined by Leica FL light microscope. Electron microscopy analysis was performed using a JEOL JEM 2100 transmission electron microscope equipped with a Gatan US4000 4K×4K camera.

### **Genomic DNA isolation for sequencing**

For comparative genomic analyses, DNA samples were isolated from three *Parasponia* accessions and three *Trema* accessions. Two grams of young leaves were ground in liquid nitrogen, and the still frozen powder resuspended in 50 ml of cold Nuclei Purification Buffer (NPB: 20 mM MOPS pH7, 40 mM NaCl, 90 mM KCl, 0.5 mM EGTA, 2 mM EDTA, 0.5 mM Spermidine3HCl and 0.2 mM Spermin4HCl). The suspension was filtered through a layer of Miracloth, and a 70 µm cell strainer, and subsequently centrifuged at 1,500 g for 10 min, 4°C. The pellet was resuspended in 15 ml of cold NPB + 0.9% (w/w) Triton X100, and incubated on ice for 15 min to allow chloroplasts to denature. The suspension was centrifuged at 1,000 g for 10 min, 4°C to collect nuclei. The pellet was resuspended in 1ml of 65°C Nuclei Lysis Buffer (2% CTAB, 1.4M NaCl, 100mM TrisHCl pH8, 5mM EDTA) supplemented with 100 µg RNase A and incubated for 30 min. at 65°C. Finally, the DNA was cleaned by phenol and chloroform extractions and ethanol precipitation.

For phylogenetic reconstruction DNA was isolated from additional specimens (Additional file 9: Table S12). In case of fresh material the protocol above was used; in case of dried material, 50 mg of dried leaf material was ground in liquid nitrogen, and the still frozen powder was resuspended in 900 µl CTAB buffer (100mM Tris pH 8.0, 1.4M NaCl, 20mM

EDTA pH8.0, 2% CTAB, 1.2%  $\beta$ -mercaptoethanol), and heated for 1 hr at 55°C, with every 15 minutes vortexing for a few seconds. This mixture was two times extracted with (1 volume and half a volume, respectively) chloroform/isoamylalcohol (24/1). The nucleic acids were precipitated by addition of 0.6 volume of cold isopropanol, followed by overnight storage at -20°C. After centrifugation, the pellet was washed with 70% ethanol, air-dried and overnight left in 0.5mM Tris pH8.5/50 $\mu$ M EDTA pH8.0 at 8°C to dissolve. DNA concentration was measured using a Qubit Fluorometer. 1 $\mu$ g of DNA was diluted to 100 $\mu$ l in 10mM Tris pH8.0/0.1mM EDTA pH8.0, 10 $\mu$ g RNase A was added, followed by 10 minutes incubation at 37°C. The DNA from this mixture was cleaned-up using a NucleoSpin gDNA Clean-up XS kit (Machery-Nagel, 52355 Duerren, Germany).

### **RNA isolation for sequencing**

RNA samples from various tissues and nodulation stages were isolated from *P. andersonii* and *Trema orientalis* RG33 (Table S8). 10 to 50 mg tissue was ground in liquid nitrogen, transferred in 0.7 ml 65°C extraction buffer (2% CTAB, 2.5% PVP-40 in 2M NaCl, 25mM EDTA, 100mM TrisHCl pH 8) and incubated at 65°C for 10 min. 75  $\mu$ l 3M NaAc pH5.6 was added to the suspension, which was subsequently extracted with phenol-chloroform and chloroform. The RNA was precipitated by addition of 2/3 volume of isopropanol and 10  $\mu$ g glycogen as a carrier. The pellet was dissolved in 100 $\mu$ l MilliQ water and treated with DNase according to the manufacturer's protocol (Qiagen RNeasy handbook, Appendix E). To remove the DNase phenol and chloroform extractions were performed followed by an ethanol precipitation. Library preparation and RNA sequencing was conducted by B.G.I. (Shenzhen, China).

### **DNA Library preparation and sequencing**

Paired-end Illumina genomic DNA libraries (insert size 500bp, 100bp reads) were prepared for all accessions (Table S4). Mate-pair libraries (3Kb, 7Kb, and 10Kb) and overlapping fragment libraries (450bp insert size, 250bp reads) were prepared for the reference accessions (*P. andersonii* accession WU01 and *T. orientalis* accession RG33). Paired-end and mate-pair libraries were sequenced on an Illumina HiSeq2000, overlapping libraries were sequenced on an Illumina MiSeq. For the *P. andersonii* and *T. orientalis* reference genomes, a total of 75Gb (~132x genome coverage) and 61Gb (~121x coverage) of data was produced respectively. The other accessions were sequenced at an average coverage of ~30X.

Illumina libraries were prepared: 500bp insert size paired-end libraries for all accessions,

mate-pair libraries (3Kb, 7Kb, and 10Kb) and overlapping fragment libraries (450bp insert size, 250bp reads) for the reference accessions (*P. andersonii* accession WU01 and *T. orientalis* accession RG33). Paired-end and mate-pair libraries were sequenced on an Illumina HiSeq2000 instrument using 101, 7, 101 flow cycles for forward, index and reverse reads, respectively. DNA Mate Pair libraries for *P. andersonii* and *T. orientalis* RG33 were made according to Nextera Mate Pair sample preparation Guide (Illumina) with few adaptations. Approximately 4 µg DNA was used for tagmentation in a 400 µL volume at 55°C for 30 minutes. Tagmented DNA was purified using a Zymoclean purification column and eluted in 30 µL elution buffer. Strand displacement of tagmented DNA was done for 30 minutes at room temperature. DNA was then purified using AmpureXP beads (Agencourt). Yield and fragment size were analyzed using Qubit fluorescence quantification (Thermo Fisher Scientific) and Bioanalyzer12000 DNA chip (Agilent technologies) respectively. Approximately 750 ng tagmented repaired DNA was loaded on a 0.6% Megabase agarose gel (Bio-rad) with SYBR safe (Thermo Fisher Scientific) staining. After electrophoresis for 3 hours at 100 Volt, a clear smear of 2 to 15 kb DNA fragments was visible.. Of both *Trema* and *Parasponia* tagmented DNA three fractions were isolated from gel, i.e. 3 to 6 kb, 7 to 9 kb and 10 to 15 kb. DNA was recovered from gel slices using Large fragment DNA recovery kit (Zymo) followed by DNA circularization for 18 hours at 30°C, exonuclease treatment at 37°C for 1 hour and inactivation at 70°C both for 30 minutes using a water bath. Remaining circularized DNA molecules were sheared using a Covaris E210 focused ultrasonicator to approximately 500 bp target size. Sheared fragments containing a biotinylated circularization adapter were enriched using M280 streptavidin Dynabeads (Thermo Fisher Scientific), followed by standard end repair, A-tailing and barcoded adapter ligation according to manufacturer's protocol (Illumina), all incubation steps using a 2720 thermocycler (Thermo Fisher Scientific). Adapter-ligated fragments were then amplified using 15 PCR cycles, purified twice with ampureXP beads and re-suspend in 20 µL elution buffer. Final libraries were quantified by Qubit and Bioanalyzer High Sensitivity DNA assay.

In addition, overlapping libraries were prepared. Approximately 750 ng was sheared in a 120µL volume using a Covaris E210 device for 450bp target fragment size. End repair, A-tailing, barcoded Adapter ligation and PCR library amplification were all performed according to Illumina TruSeq LT DNA gel free library prep guidelines. Adapter Ligated DNA fragments were purified using AmpureXP with 20 µL elution buffer and size selected using two slots on a 2% Agarose dye free gel (Blue Pippin, Sage Science). Size selection of *Parasponia* DNA was done using a tight selection protocol (575 bp target), whereas *Trema*



DNA size selection was done using a narrow range selection protocol (525 to 615 bp range). Size-selected fragments were Ampure XP purified and finally eluted in 20  $\mu$ L Elution Buffer TE. Libraries were quantified by Qubit fluorescence and library fragment size was analyzed by Bioanalyzer High Sensitivity DNA assay.

The barcoded overlapping libraries of *Trema* and *Parasponia* were sequenced on a MiSeq instrument (2\*251 cycles for Paired End sequencing plus 7 cycles for the indexing reads). For the *Parasponia* and *Trema* reference genomes, a total of 75Gb (~132x genome coverage) and 61Gb (~121x coverage) of data was produced respectively. The barcoded Mate Pair libraries were loaded for DNA clustering on two lanes of an Illumina Paired-End flow cell using a cBot. Sequencing was done on an HiSeq2000 instrument using 101, 7, 101 flow cycles for forward, index and reverse reads. The barcoded overlapping libraries of *Trema* and *Parasponia* were equimolar pooled for clustering and sequencing on an Illumina MiSeq instrument using six MiSeq V3 flow-cells and 2\*300 cycles for Paired End sequencing plus 7 cycles for the indexing reads. De-multiplexing of resulting data was carried out using Casava 1.8 software. A list of DNA samples is given in Additional file 3: Table S5.

### **Estimation of heterozygosity levels and genome size**

To generate preliminary estimates of genome size of available germplasm we used flow cytometry generally as described previously (10, 11). In short; nuclei were isolated from leaf tissue ground in liquid nitrogen and suspended in 10 ml ice-cold Nuclear preparation buffer (NPB; 20 mM MOPS pH 7 40 mM NaCl, 90 mM KCl, 0.5 mM EGTA, 2 mM EDTA, 0.5 mM Spermidine, 0.2 mM Spermine and Complete Protease Inhibitor cocktail of Sigma-Aldrich). The suspension was filtered through a 70  $\mu$ m cell strainer and spun 10 min at 1,000 g at 4°C. The pellet was resuspended in 1 ml NPB complemented with 0.1% Triton X-100, transfer to 1.5 ml LoBind Eppendorf tube, and spun at 1,000 g for 10 min at 4 °C. Subsequently, the pellet containing nuclei were resuspended in NPB buffer containing 50  $\mu$ g/ml propidium iodide (PI). These were analysed FACS Aria II (Becton Dickenson) using a 488 nm laser with the following modifications: Biparametric contour plots of FL1-A (616/23 nm band-pass filter) versus FL2-A (530/30 nm band-pass filter) were generated followed by gating the nuclei derived PI signals and representing these in a uniparametric histogram of FL1-A fluorescence that was used to estimate genome size. To calibrate the flow cytometry results *Medicago truncatula* cv. Jemalong A17 (~500 Mb) was included as a standard genome.

To assess levels of heterozygosity and more accurately estimate genome size we performed

k-mer analyses based on medium-coverage sequence data. Multiplicities of 21-mers were extracted from the reads using Jellyfish (version 2.2.0) (12) and processed using custom R scripts. First, a multiplicity threshold was determined below which most k-mers are considered to represent sequencing errors and which were excluded from further analysis. In principle, errors occur randomly and this generates a high-frequency peak at multiplicity 1 after which frequency decreases and subsequently increases due to a broad frequency peak around the mean genome coverage. The error multiplicity threshold was therefore set at the multiplicity with the lowest frequency between these two peaks. Next, we identified the peak multiplicity as the one with the highest frequency. Homozygous genome coverage was estimated by scaling the peak multiplicity proportional to the difference of its frequency with that of multiplicities one below and above. Heterozygous coverage was defined as half that of the homozygous coverage (Additional file 2: Fig. S5). Finally, genome size was calculated as the total number of error-free k-mers divided by the estimated homozygous genome coverage (Additional file 3: Table S4). These estimates are generally comparable to those based on our flow cytometry measurements (Additional file 3: Table S3) except for genomes that differed much from the standard genome used to calibrate measurements. This inconsistency is probably due to the use of a single standard to calibrate FACS measurements. We therefore considered the quantitative genome estimates based on k-mer analysis a more accurate estimation of genome size.

### **Characterization of repetitive sequences**

Repetitive sequences are inherently difficult to assemble. We therefore characterized and quantified repetitive element using the ab initio graph-based clustering approach implemented in RepeatExplorer (13). Analyses were based on random subsamples of 20,000 paired-end reads and included a reclustering step where clusters with shared mate pairs are merged (threshold  $k=0.2$ ). Repeat classification was based on the RepeatExplorer Viridiplantae dataset and on plant organellar sequences. Relative sizes of repetitive sequences in the genome were scaled by the genome size estimations based on k-mer analysis to generate absolute sizes in Mb (Fig. S9).

### **Assembly of reference genomes**

Raw sequencing data were preprocessed as follows: first, adapters (standard and junction) were removed and reads were trimmed using fastq-mcf (version 1.04.676) (14). Minimum remaining sequence length was set to 50 for HiSeq data and 230 for MiSeq data. Duplicates were removed using FastUniq (version 1.1) (14, 15). Chloroplast and mitochondrial genomes

were assembled first with IOGA (version 1) using reference sets of plant chloroplast and mitochondrial genomes (16). Chloroplast and mitochondrial reads were identified and separated from the nuclear reads by mapping to four organellar assemblies (*Parasponia andersonii*, *Trema orientalis*, *Morus indica*, *Malus x domestica*) using BWA-MEM (version 0.7.10) (17). (2.5% of reads were filtered in *P. andersonii* and 1.7% in *T. orientalis* RG33). Finally, a contamination database was produced by BLASTing preliminary in-house *Parasponia andersonii* and *Trema orientalis* draft genome assemblies against NCBI's nt database. Hits outside the plant kingdom were selected using a custom script and corresponding sequences were downloaded from GenBank. The contamination database was then supplemented with plant virus sequences (<http://www.dpvweb.net/seqs/allplantfasta.zip>). Genomics reads were filtered by mapping to this contamination database (0.1% reads were filtered in *P. andersonii* and 0.2% in *T. orientalis* RG33).

The preprocessed data were *de novo* assembled using ALLPATHS-LG (release 48961) (18). Relevant parameters were PLOIDY=2 and GENOME\_SIZE=600000000. The assemblies were performed on the Breed4Food High-Performance Cluster from Wageningen UR (<http://breed4food.com>).

Remaining contamination in the ALLPATHS-LG assembly was identified by blasting the assembled contigs to their respective chloroplast and mitochondrial genomes, the NCBI nr and univec databases (Downloaded 29 October 2014) and by mapping back genomic reads of the HiSeq 500bp insert size library. Regions were removed if they matched all of the following criteria: (1) significant blast hits with more than 98% identity (for the nr database only blast results that were not plant-derived were selected); (2) read coverage lower than 2 or higher than 50 (average coverage for the HiSeq 500bp insert size library is ~30x); (3) number of properly paired reads lower than 2.

Resulting contigs were subsequently scaffolded with two rounds of SSPACE-standard (v3.0) (19) with the mate-pair libraries using default settings. In order to use reads mapped with BWA-MEM (v0.7.10) we used a python script written by Peter Cock to convert sam files to tabular format (available on [Github](#)). We used the output of the second run of SSPACE scaffolding as the final assembly.

### **Assembly of *Parasponia* and *Trema* draft genomes**

To assess whether gene copy number variants of interest are also present in other,

non-reference *Parasponia* and *Trema* genomes, we assembled genomic sequences of *P. rigida*, *P. rugosa*, *T. levigata*, and *T. orientalis* accession RG16 based on the medium-coverage sequence data that was also used for *k*-mer analysis (Table S4, S5). Assembly was performed with the iterative de Bruijn graph assembler IDBA-UD version 1.1.1 (20), iterating from 30-mers (assembling low-coverage regions) to 120-mers (accurately assembling regions of high coverage), with incremental steps of 20. Genes of interest were manually annotated and putatively lost genes or gene fragments were confirmed based on (I.) genomic alignments performed with the EMBOSS 6.5.7 tool (21) dotmatcher as implemented in the Geneious function dotplot (Fig. S23), and (II.) mapping the medium-coverage reads of *P. rigida* and *P. rugosa* to the *T. orientalis* RG33 reference genome and *T. orientalis* RG16 and *T. levigata* to the *P. andersonii* reference genome (Fig. S18,21-22). Mapping was done with BWA-MEM version 0.7.10 (17) with default parameters and unfiltered reads. Mappings covered on average ~95-96% of all exons comprising CDS with an average coverage of ~27x for *P. rigida*, ~34x for *P. rugosa*, ~34x for *T. levigata*, and ~20x for *T. orientalis* RG16 as determined using the samtools bedcov function (22).

### **Phylogenetic reconstructions**

Multiple sequence alignments were generated using MAFFT version 7.017 (23). Phylogenetic analyses of Cannabaceae were based on nucleotide alignments and performed using MrBayes version 3.2.2 (24). The first phylogenetic reconstruction of Cannabaceae was based on four markers comprising data from Yang et al. 2013 (25) supplemented with new data generated with primers and protocols published therein (Dataset S7) with five optimal partitions and models of sequence evolution: atpB-rbcL combined with trnL-F (GTR+I+G); first codon position of rbcL (GTR+I+G); second position of rbcL (SYM+I+G); third position of rbcL (GTR+G); rps16 (GTR+G). The second phylogenetic reconstruction of Cannabaceae was based on whole chloroplast genomes (Dataset S7) with eight optimal partitions and models of sequence evolution: tRNA sequence (HKY+I), rRNA sequence (GTR+I), long single copy region (LSC) coding sequence (GTR+I+G), LSC non-coding sequence (GTR+G), short single copy region (SSC) coding sequence (GTR+G), SSC non-coding sequence (GTR+G), inverted repeat region (IR) coding sequence (GTR+G), and IR non-coding sequence (GTR+G).

Phylogenetic analyses of genes were based on amino acid sequences. Analyses of orthogroups comprising legume symbiosis genes (146 orthogroups) and nodule-enhanced genes (414 orthogroups) were performed using RAxML version 8.2.11 setting

gamma-distributed rate variation, estimating optimal models of amino acid sequence evolution (PROTGAMMAAUTO), and running 100 fast bootstrap replicates to assess clade support. Analyses of HB, *NFP*, *HCT*, *EPR*, *NIN*, and *RPG* genes were performed using MrBayes version 3.2.6 running 2.2 million generations, setting gamma-distributed rate variation and integrating over different models of amino acid sequence evolution (aamodelpr=mixed). For *NFP* analyses was based on the kinase domain only, because based on the full-length sequences the relationships between the *NFP1* and *NFP2* paralogs remained unresolved.

## References

1. Hoagland DR, Arnon DI (1950) The water-culture method for growing plants without soil. *Circular California Agricultural Experiment Station* 347:1–32.
2. Trouvelot A, Kough JL, Gianinazzi-Pearson V (1986) Mesure de taux de mycorhization VA d'un système racinaire. Recherche de méthodes d'estimation ayant une signification fonctionnelle. *Physiological and Genetic Aspects of Mycorrhizae*, ed Gianinazzi-Pearson GS V (INRA Press, Paris), pp 217–221.
3. Huisman R, et al. (2015) Haustorium formation in *Medicago truncatula* roots infected by *Phytophthora palmivora* does not involve the common endosymbiotic program shared by arbuscular mycorrhizal fungi and rhizobia. *Mol Plant Microbe Interact* 28(12):1271–1280.
4. Merckx VSFT, et al. (2015) Evolution of endemism on a young tropical mountain. *Nature* 524:347–350.
5. Op den Camp RHM, et al. (2012) Nonlegume *Parasponia andersonii* deploys a broad rhizobium host range strategy resulting in largely variable symbiotic effectiveness. *Mol Plant Microbe Interact* 25(7):954–963.
6. Becking JH (1983) The *Parasponia parviflora*—*Rhizobium* symbiosis. Host specificity, growth and nitrogen fixation under various conditions. *Plant Soil* 75(3):309–342.
7. Bergersen FJ (1970) The quantitative relationship between nitrogen fixation and the acetylene-reduction assay. *Aust Jnl Of Bio Sci* 23(4):1015–1026.

8. Cristescu SM, Persijn ST, te Lintel Hekkert S, Harren FJM (2008) Laser-based systems for trace gas detection in life sciences. *Appl Phys B* 92(3):343–349.
9. Fedorova E, et al. (1999) Localization of H(+)-ATPases in soybean root nodules. *Planta* 209(1):25–32.
10. Hare EE, Johnston JS (2011) Genome size determination using flow cytometry of propidium iodide-stained nuclei. *Methods Mol Biol* 772:3–12.
11. Galbraith DW, Lambert GM (2012) High-throughput monitoring of plant nuclear DNA contents via flow cytometry. *Methods Mol Biol* 918:311–325.
12. Marçais G, Kingsford C (2011) A fast, lock-free approach for efficient parallel counting of occurrences of k-mers. *Bioinformatics* 27(6):764–770.
13. Novák P, Neumann P, Pech J, Steinhaisl J, Macas J (2013) RepeatExplorer: a Galaxy-based web server for genome-wide characterization of eukaryotic repetitive elements from next-generation sequence reads. *Bioinformatics* 29(6):792–793.
14. Aronesty E (2013) Comparison of sequencing utility programs. *Open Bioinforma J* 7(1):1–8.
15. Xu H, et al. (2012) FastUniq: a fast de novo duplicates removal tool for paired short reads. *PLoS One* 7(12):e52249.
16. Bakker FT, et al. (2016) Herbarium genomics: plastome sequence assembly from a range of herbarium specimens using an Iterative Organelle Genome Assembly pipeline. *Biol J Linn Soc Lond* 117(1):33–43.
17. Li H, Durbin R (2009) Fast and accurate short read alignment with Burrows–Wheeler transform. *Bioinformatics* 25(14):1754–1760.
18. Gnerre S, et al. (2011) High-quality draft assemblies of mammalian genomes from massively parallel sequence data. *Proc Natl Acad Sci U S A* 108(4):1513–1518.
19. Boetzer M, Henkel CV, Jansen HJ, Butler D, Pirovano W (2011) Scaffolding pre-assembled contigs using SSPACE. *Bioinformatics* 27(4):578–579.
20. Peng Y, Leung HCM, Yiu SM, Chin FYL (2012) IDBA-UD: a de novo assembler for single-cell and metagenomic sequencing data with highly uneven depth. *Bioinformatics*

28(11):1420–1428.

21. Rice P, Longden I, Bleasby A (2000) EMBOSS: the European Molecular Biology Open Software Suite. *Trends Genet* 16(6):276–277.
22. Li H, et al. (2009) The Sequence Alignment/Map format and SAMtools. *Bioinformatics* 25(16):2078–2079.
23. Katoh K, Standley DM (2013) MAFFT multiple sequence alignment software version 7: improvements in performance and usability. *Mol Biol Evol* 30(4):772–780.
24. Ronquist F, Huelsenbeck JP (2003) MrBayes 3: Bayesian phylogenetic inference under mixed models. *Bioinformatics* 19(12):1572–1574.
25. Yang M-Q, et al. (2013) Molecular phylogenetics and character evolution of Cannabaceae. *Taxon* 62(3):473–485.
